# Supplementary material for: Patients with Systemic Juvenile Idiopathic Arthritis (SJIA) Show Differences in Autoantibody Signatures Based on Disease Activity
Source: Biomolecules. 2023 Sep 15;13(9):1392. doi: 10.3390/biom13091392 (PMC10527260; doi:10.3390/biom13091392)
Supplement: Supplementary file 1 [file biomolecules-13-01392-s001.zip › supplementary_tables_KRAINER.xlsx]

## Sheet: Table S1
		active (n=26)
no of active joints 2		4 (2 - 11)
		% documented: 31
Arthritis 3		5 (62,5)
		% documented: 31
Fever 3		4 (50)
		% documented: 31
Skin and muscous membrane involvment 3		3 (37,5)
		% documented: 31
Hepatosplenomegaly3		1 (12,5)
		% documented: 31
Lymphadenopathy3		2 (25)
		% documented: 31
Serositis3		2 (25)
		% documented: 31
Macrophage activation syndrome3		1 (12,5)
		% documented: 31
1 in years
2 median (range)
3 n (%)

## Sheet: Table S2
row.names	names	SYMBOL	ID	logFC	AveExpr	t	P.Value	adj.P.Val	B		Similarity	Score	Gaps
58	RZPDp9028K034Q	IARS2	RZPDp9028K034Q	0.745283	8.51147	3.29055	0.00322913	0.668556	-2.48401		70.1%	584.5	1.4%
12	RZPDp9027F197Q	CALM3	RZPDp9027F197Q	0.591418	8.78184	3.89346	0.000742496	0.668556	-1.77263
423	RZPDp9027I1515Q	MEIS3	RZPDp9027I1515Q	0.576383	9.3672	2.52067	0.0191758	0.668556	-3.37831
1226	RZPDp9028H069Q	CC2D1B	RZPDp9028H069Q	-0.714026	7.84964	-2.01821	0.0554908	0.678182	-3.91557
638	RZPDp9027I1518Q	ZNF232	RZPDp9027I1518Q	0.541771	9.47549	2.32035	0.0296364	0.669829	-3.59907		67.3%	711.5	4.3%
53	RZPDp9028J033Q	MAFF	RZPDp9028J033Q	0.534935	8.60518	3.32658	0.00296153	0.668556	-2.44134		61.3%	407.0	4.5%
251	RZPDp9028F176Q	IGHV3-21	RZPDp9028F176Q	0.529787	8.27987	2.73404	0.0118852	0.668556	-3.13604
159	RZPDp9028K037Q	BYSL	RZPDp9028K037Q	0.52303	8.11488	2.93036	0.00756644	0.668556	-2.90841
65	RZPDp9027B1615Q	SDHA	RZPDp9027B1615Q	0.517994	8.94921	3.25024	0.00355647	0.668556	-2.53174		71.0%	688.5	1.7%
117	RZPDp9028I145Q	ARID1A	RZPDp9028I145Q	0.516456	7.84415	3.04339	0.00580907	0.668556	-2.77591
2313	RZPDp9027C188Q	WASHC1	RZPDp9027C188Q	-0.573115	8.99991	-1.63696	0.115375	0.746045	-4.2773
20	RZPDp9028C034Q	TPM4	RZPDp9028C034Q	0.516156	8.08584	3.73984	0.00108378	0.668556	-1.95269
1688	RZPDp9027A168Q	HDAC5	RZPDp9027A168Q	-0.56906	9.51781	-1.83563	0.0794959	0.703841	-4.09478
392	RZPDp9027M172Q	RBM5	RZPDp9027M172Q	0.513303	8.9323	2.558	0.0176543	0.668556	-3.3364		62.6%	390.5	2.1%
1656	RZPDp9027A188Q	MKKS	RZPDp9027A188Q	-0.554476	7.7573	-1.84364	0.0782787	0.703841	-4.08714
1168	RZPDp9027P118Q	CSAD	RZPDp9027P118Q	-0.546154	9.41703	-2.04727	0.0523301	0.669905	-3.88614
582	RZPDp9028B1110Q	IDS	RZPDp9028B1110Q	0.509831	7.72074	2.37335	0.0264487	0.669829	-3.54139
1100	RZPDp9028E152Q	TLE2	RZPDp9028E152Q	0.506472	7.41757	2.07518	0.0494468	0.669829	-3.85766
294	RZPDp9027N063Q	PPP1R15A	RZPDp9027N063Q	0.504665	9.1906	2.66632	0.0138548	0.668556	-3.21361
67	RZPDp9027I1616Q	DRAXIN	RZPDp9027I1616Q	0.50076	9.12064	3.24729	0.00358168	0.668556	-2.53524
1771	RZPDp9028A206Q	SPTBN1	RZPDp9028A206Q	-0.52013	7.98052	-1.80311	0.084611	0.716303	-4.1256
589	RZPDp9027I061Q	GSK3A	RZPDp9027I061Q	0.497397	9.12707	2.36531	0.0269113	0.669829	-3.55018
929	RZPDp9027A062Q	SYT3	RZPDp9027A062Q	0.490447	9.43822	2.1504	0.0423715	0.669829	-3.77987
1049	RZPDp9028P0316Q	ANXA11	RZPDp9028P0316Q	0.481363	7.24003	2.09194	0.0477843	0.669829	-3.84045
1526	RZPDp9028I091Q	PSMB5	RZPDp9028I091Q	-0.503369	8.1151	-1.88785	0.0718449	0.702767	-4.04457
100	RZPDp9028M1111Q	ZNF784	RZPDp9028M1111Q	0.481306	8.16975	3.09575	0.00513474	0.668556	-2.71427
2278	RZPDp9027I1615Q	ABHD8	RZPDp9027I1615Q	-0.500388	7.72067	-1.64555	0.113579	0.746045	-4.2697
491	RZPDp9027B058Q	PDAP1	RZPDp9027B058Q	0.472255	9.49632	2.45279	0.0222591	0.669829	-3.45394
1314	RZPDp9027K1514Q	TOMM40	RZPDp9027K1514Q	-0.497356	8.80246	-1.98162	0.0597103	0.681307	-3.95229
327	RZPDp9028B078Q	VPS41	RZPDp9028B078Q	0.467729	7.64037	2.62363	0.0152499	0.668556	-3.2622
30	RZPDp9028G1512Q	LAG3	RZPDp9028G1512Q	0.465234	7.55317	3.55137	0.00171861	0.668556	-2.17507
536	RZPDp9028B129Q	TBCB	RZPDp9028B129Q	0.462409	7.86365	2.41395	0.0242245	0.669829	-3.49685
89	RZPDp9028O1715Q	WDTC1	RZPDp9028O1715Q	0.459226	8.43731	3.14802	0.00453702	0.668556	-2.6526
7	RZPDp9028E234Q	TNFRSF21	RZPDp9028E234Q	0.458788	7.91973	4.0164	0.000547952	0.668556	-1.62961
523	RZPDp9028E0313Q	PFAS	RZPDp9028E0313Q	0.453828	7.73376	2.42673	0.0235608	0.669829	-3.48276
256	RZPDp9028G154Q	TUFT1	RZPDp9028G154Q	0.452609	8.83976	2.72988	0.0119983	0.668556	-3.14083
395	RZPDp9027L0717Q	FGFR3	RZPDp9027L0717Q	0.447761	8.32451	2.55644	0.0177158	0.668556	-3.33816
511	RZPDp9028A147Q	TICAM1	RZPDp9028A147Q	0.441984	7.78172	2.43404	0.0231887	0.669829	-3.47469
250	RZPDp9027J2019Q	ARFIP2	RZPDp9027J2019Q	0.441545	9.79918	2.73495	0.0118607	0.668556	-3.135
1458	RZPDp9027L1817Q	SLC25A29	RZPDp9027L1817Q	-0.466096	8.50959	-1.91292	0.0684053	0.701198	-4.02016
39	RZPDp9028E245Q	KHSRP	RZPDp9028E245Q	0.438329	7.89308	3.43883	0.0022588	0.668556	-2.30832
568	RZPDp9028P024Q	ARHGDIA	RZPDp9028P024Q	0.431553	8.43352	2.3867	0.0256972	0.669829	-3.52678
10	RZPDp9028A1415Q	THAP4	RZPDp9028A1415Q	0.430434	7.63412	3.94877	0.0006477	0.668556	-1.70815
47	RZPDp9028J0810Q	ABCF1	RZPDp9028J0810Q	0.430067	7.64604	3.35314	0.00277817	0.668556	-2.40987
111	RZPDp9028F166Q	TADA3	RZPDp9028F166Q	0.426603	8.12101	3.06036	0.00558169	0.668556	-2.75594
1069	RZPDp9027P211Q	IGSF9	RZPDp9027P211Q	0.424901	8.89965	2.08567	0.0484001	0.669829	-3.84689
311	RZPDp9028N236Q	SOX4	RZPDp9028N236Q	0.42309	7.6718	2.6492	0.0143992	0.668556	-3.23313
221	RZPDp9027B1415Q	COL1A1	RZPDp9027B1415Q	0.422174	8.96817	2.78091	0.0106806	0.668556	-3.08205
785	RZPDp9027M181Q	SH2B1	RZPDp9027M181Q	0.421897	8.38847	2.23428	0.0355691	0.669829	-3.69146
351	RZPDp9027D0312Q	APBA2	RZPDp9027D0312Q	0.420866	9.08088	2.59631	0.0162111	0.668556	-3.29317
167	RZPDp9028M224Q	ADAM15	RZPDp9028M224Q	0.420706	8.28073	2.91058	0.00792219	0.668556	-2.9315
136	RZPDp9027A038Q	SPTBN2	RZPDp9027A038Q	0.417339	9.6354	2.97826	0.00676717	0.668556	-2.85236
28	RZPDp9027M046Q	CCDC92	RZPDp9027M046Q	0.417203	8.07175	3.5992	0.00152939	0.668556	-2.11852
34	RZPDp9028C189Q	TAP1	RZPDp9028C189Q	0.417061	7.71718	3.48844	0.00200282	0.668556	-2.24956
139	RZPDp9027A222Q	FNBP1L	RZPDp9027A222Q	0.416948	9.12042	2.96799	0.00693133	0.668556	-2.86439
17	RZPDp9028A197Q	PLXNA2	RZPDp9028A197Q	0.416158	7.42757	3.77053	0.00100507	0.668556	-1.91661
102	RZPDp9028A1216Q	PPP6R1	RZPDp9028A1216Q	0.415511	7.20024	3.09371	0.00515958	0.668556	-2.71667
1372	RZPDp9028G0612Q	AKAP8	RZPDp9028G0612Q	-0.437184	7.43497	-1.94962	0.0636318	0.693924	-3.98408
516	RZPDp9027M062Q	CHGB	RZPDp9027M062Q	0.413136	9.26307	2.43084	0.0233509	0.669829	-3.47822
35	RZPDp9027J075Q	CYB5R4	RZPDp9027J075Q	0.41302	8.72812	3.48636	0.00201295	0.668556	-2.25202
1260	RZPDp9027G106Q	ERP29	RZPDp9027G106Q	-0.432945	11.0613	-2.00331	0.057176	0.679423	-3.93057
1156	RZPDp9027A1116Q	ME3	RZPDp9027A1116Q	-0.432087	9.21937	-2.0507	0.051968	0.669905	-3.88265
3092	RZPDp9028C152Q	SPTBN1	RZPDp9028C152Q	-0.432079	8.20313	-1.45413	0.159544	0.773623	-4.43214
29	RZPDp9027M034Q	GPX1	RZPDp9027M034Q	0.412388	8.8407	3.55688	0.00169568	0.668556	-2.16855
153	RZPDp9028B091Q	MAFF	RZPDp9028B091Q	0.411997	7.62249	2.94039	0.00739192	0.668556	-2.89668
242	RZPDp9028D084Q	LTBP4	RZPDp9028D084Q	0.411273	7.77043	2.74923	0.0114814	0.668556	-3.11857
324	RZPDp9027M061Q	DDX11	RZPDp9027M061Q	0.410897	8.96889	2.62618	0.015163	0.668556	-3.2593
274	RZPDp9028A054Q	COMP	RZPDp9028A054Q	0.408172	7.92206	2.70425	0.0127165	0.668556	-3.17023
48	RZPDp9027F055Q	APLP1	RZPDp9027F055Q	0.405163	9.29492	3.3508	0.00279388	0.668556	-2.41264
1958	RZPDp9027B135Q	PSMD8	RZPDp9027B135Q	-0.419143	7.75598	-1.74099	0.0951719	0.727283	-4.18347
794	RZPDp9027H0116Q	RUVBL1	RZPDp9027H0116Q	0.404711	8.9628	2.22865	0.0359929	0.669829	-3.69745
1198	RZPDp9027K2211Q	RFC2	RZPDp9027K2211Q	-0.416707	10.2659	-2.03419	0.0537328	0.671955	-3.89942
827	RZPDp9028N0610Q	PLXNA1	RZPDp9028N0610Q	0.403775	7.91949	2.20969	0.0374528	0.669829	-3.71755
73	RZPDp9028L1210Q	BTBD11	RZPDp9028L1210Q	0.402311	8.55833	3.23651	0.00367509	0.668556	-2.54799
358	RZPDp9028G037Q	INTS1	RZPDp9028G037Q	0.402216	8.4554	2.58825	0.0165052	0.668556	-3.30228
50	RZPDp9028B196Q	TASOR	RZPDp9028B196Q	0.40212	7.44887	3.33584	0.00289631	0.668556	-2.43037
199	RZPDp9027F062Q	SPSB3	RZPDp9027F062Q	0.40154	8.91912	2.82973	0.00954922	0.668556	-3.02556
1491	RZPDp9027C1411Q	NUP88	RZPDp9027C1411Q	-0.412872	9.4206	-1.90257	0.0698073	0.701959	-4.03026
189	RZPDp9028F066Q	RPS5	RZPDp9028F066Q	0.401248	7.96915	2.84228	0.00927728	0.668556	-3.01099
488	RZPDp9028E179Q	ZNF749	RZPDp9028E179Q	0.401104	8.47172	2.45768	0.0220223	0.669829	-3.44851
306	RZPDp9028C155Q	MAGI1	RZPDp9028C155Q	0.39998	8.21021	2.6543	0.014235	0.668556	-3.22732
829	RZPDp9027E062Q	NMT1	RZPDp9027E062Q	0.398302	9.27927	2.20822	0.0375682	0.669829	-3.7191
821	RZPDp9027F1514Q	CAMKV	RZPDp9027F1514Q	0.397935	9.67419	2.21178	0.0372889	0.669829	-3.71533
165	RZPDp9028A2114Q	PUM3	RZPDp9028A2114Q	0.397755	7.30472	2.91341	0.00787031	0.668556	-2.9282
308	RZPDp9027N184Q	PALM	RZPDp9027N184Q	0.396774	8.83284	2.65161	0.0143214	0.668556	-3.23038
2500	RZPDp9027P0211Q	PLCG1	RZPDp9027P0211Q	-0.408361	8.30932	-1.59034	0.125535	0.752861	-4.31804
63	RZPDp9028B0518Q	TNIP1	RZPDp9028B0518Q	0.395588	7.54753	3.25601	0.00350769	0.668556	-2.52491
650	RZPDp9027J0612Q	UBXN1	RZPDp9027J0612Q	0.395184	9.27536	2.31295	0.0301079	0.669829	-3.60707
176	RZPDp9028A044Q	ABTB1	RZPDp9028A044Q	0.39485	7.78987	2.87533	0.0085962	0.668556	-2.97258
40	RZPDp9028A124Q	HBB	RZPDp9028A124Q	0.394049	8.07409	3.4319	0.00229702	0.668556	-2.31653
255	RZPDp9028N104Q	ZCCHC9	RZPDp9028N104Q	0.392157	8.08576	2.7301	0.0119921	0.668556	-3.14057
606	RZPDp9027E1815Q	TMEM183A	RZPDp9027E1815Q	0.390884	9.86704	2.35047	0.0277838	0.669829	-3.56636
24	RZPDp9027M051Q	FLOT1	RZPDp9027M051Q	0.388343	8.34972	3.67994	0.00125531	0.668556	-2.02322
2355	RZPDp9027P2311Q	EPS15L1	RZPDp9027P2311Q	-0.400776	9.64572	-1.62753	0.117372	0.746943	-4.28561
797	RZPDp9028B223Q	IGKC	RZPDp9028B223Q	0.387749	8.75864	2.22624	0.0361755	0.669829	-3.70001
303	RZPDp9027I091Q	CPNE6	RZPDp9027I091Q	0.387174	8.40042	2.65823	0.0141095	0.668556	-3.22283
786	RZPDp9028N176Q	CDC16	RZPDp9028N176Q	0.386158	7.79155	2.23378	0.0356066	0.669829	-3.69199
204	RZPDp9028F174Q	C8orf37	RZPDp9028F174Q	0.386155	8.10384	2.82001	0.00976494	0.668556	-3.03682
113	RZPDp9028E066Q	EIF3F	RZPDp9028E066Q	0.385581	7.54937	3.05369	0.00567003	0.668556	-2.76379
945	RZPDp9028D224Q	MCM5	RZPDp9028D224Q	0.38481	7.89608	2.14246	0.0430729	0.669829	-3.78815
1295	RZPDp9027C2415Q	IFRD2	RZPDp9027C2415Q	-0.396804	9.39108	-1.98709	0.0590617	0.681307	-3.94682
207	RZPDp9027I077Q	LRSAM1	RZPDp9027I077Q	0.384664	8.16817	2.80586	0.0100872	0.668556	-3.0532
86	RZPDp9027D046Q	ZFP36L1	RZPDp9027D046Q	0.384228	8.61517	3.16257	0.00438305	0.668556	-2.63542
1614	RZPDp9027A2113Q	LMF2	RZPDp9027A2113Q	-0.395849	9.62608	-1.85735	0.076231	0.703841	-4.074
877	RZPDp9028M127Q	ATXN3	RZPDp9028M127Q	0.384011	8.84508	2.18217	0.0396676	0.669829	-3.74658
312	RZPDp9028J0320Q	HLA-C	RZPDp9028J0320Q	0.381428	8.95013	2.6457	0.0145129	0.668556	-3.23711
1710	RZPDp9027M1218Q	RPL3	RZPDp9027M1218Q	-0.392193	8.65209	-1.82912	0.0804975	0.705789	-4.10097
1278	RZPDp9027I0611Q	STIP1	RZPDp9027I0611Q	-0.391252	9.38927	-1.99351	0.0583091	0.681307	-3.9404
934	RZPDp9027N034Q	EHMT2	RZPDp9027N034Q	0.379627	9.21597	2.1475	0.0426261	0.669829	-3.78289
599	RZPDp9028N1619Q	WBP2	RZPDp9028N1619Q	0.378991	7.30905	2.36026	0.0272056	0.669829	-3.5557
1592	RZPDp9027G048Q	MORF4L2	RZPDp9027G048Q	-0.389564	9.24551	-1.86312	0.075384	0.703841	-4.06846
572	RZPDp9028D156Q	SF3B1	RZPDp9028D156Q	0.377557	7.54046	2.37714	0.0262335	0.669829	-3.53725
712	RZPDp9028O154Q	C3	RZPDp9028O154Q	0.377367	9.40046	2.27743	0.0324714	0.669829	-3.64534
1247	RZPDp9028M0611Q	IL1RN	RZPDp9028M0611Q	-0.388141	8.18922	-2.00939	0.0564827	0.678323	-3.92446
79	RZPDp9027B217Q	ACBD3	RZPDp9027B217Q	0.374834	8.98753	3.20703	0.00394297	0.668556	-2.58287
1607	RZPDp9028J1715Q	CALHM2	RZPDp9028J1715Q	-0.388005	8.12432	-1.85935	0.0759365	0.703841	-4.07208
549	RZPDp9028F185Q	RNF43	RZPDp9028F185Q	0.37282	7.90432	2.40113	0.0249075	0.669829	-3.51095
2049	RZPDp9028N1020Q	TSPYL1	RZPDp9028N1020Q	-0.387132	9.84636	-1.71243	0.100393	0.733779	-4.20962
293	RZPDp9028J0515Q	ZFX	RZPDp9028J0515Q	0.371967	8.77081	2.66642	0.0138515	0.668556	-3.21349
138	RZPDp9028L0615Q	FBXO42	RZPDp9028L0615Q	0.370559	7.35902	2.96896	0.00691564	0.668556	-2.86325
14	RZPDp9027M044Q	ZC3H7A	RZPDp9027M044Q	0.368555	9.22618	3.83374	0.000860271	0.668556	-1.84246
81	RZPDp9028P2310Q	RAD21	RZPDp9028P2310Q	0.3681	7.31753	3.19886	0.00402052	0.668556	-2.59253
134	RZPDp9027B212Q	ODC1	RZPDp9027B212Q	0.367383	8.78149	2.9812	0.00672082	0.668556	-2.84892
3154	RZPDp9027I2110Q	AKT3	RZPDp9027I2110Q	-0.382864	8.87155	-1.44039	0.163355	0.775771	-4.44323
68	RZPDp9028M034Q	MANSC1	RZPDp9028M034Q	0.366591	7.97212	3.24569	0.00359539	0.668556	-2.53713
80	RZPDp9028M125Q	SCAND1	RZPDp9028M125Q	0.366575	7.84026	3.20404	0.00397115	0.668556	-2.5864
15	RZPDp9028B155Q	CNN1	RZPDp9028B155Q	0.365094	8.05707	3.83361	0.000860546	0.668556	-1.84262
798	RZPDp9027F1416Q	C2CD2L	RZPDp9027F1416Q	0.364646	9.50952	2.22557	0.036226	0.669829	-3.70071
429	RZPDp9027B033Q	HES5	RZPDp9027B033Q	0.359592	9.25243	2.51251	0.019524	0.668556	-3.38744
397	RZPDp9027I027Q	GAREM1	RZPDp9027I027Q	0.359125	9.02026	2.55106	0.0179285	0.668556	-3.34421
534	RZPDp9028D196Q	VDAC1	RZPDp9028D196Q	0.358849	7.52281	2.41595	0.0241194	0.669829	-3.49465
96	RZPDp9028E205Q	ID3	RZPDp9028E205Q	0.358826	7.63481	3.10701	0.00499986	0.668556	-2.70099
238	RZPDp9027J2117Q	CALM3	RZPDp9027J2117Q	0.358745	8.93648	2.7576	0.0112645	0.668556	-3.10893
2873	RZPDp9027G2316Q	PJA2	RZPDp9027G2316Q	-0.377356	8.85204	-1.50356	0.146427	0.762868	-4.39161
160	RZPDp9027A0710Q	PITPNM1	RZPDp9027A0710Q	0.35806	9.25264	2.92509	0.00765967	0.668556	-2.91456
103	RZPDp9027E199Q	FIS1	RZPDp9027E199Q	0.35576	8.1623	3.09262	0.00517277	0.668556	-2.71795
49	RZPDp9027J155Q	HSPA9	RZPDp9027J155Q	0.35559	8.80891	3.34109	0.00285991	0.668556	-2.42414
890	RZPDp9027E196Q	ASPSCR1	RZPDp9027E196Q	0.355447	8.50254	2.16904	0.0407654	0.669829	-3.76036
442	RZPDp9027G161Q	TNKS	RZPDp9027G161Q	0.354871	7.97296	2.49998	0.0200705	0.668556	-3.40144
3352	RZPDp9027K247Q	CD2BP2	RZPDp9027K247Q	-0.374571	9.41789	-1.39798	0.175578	0.783523	-4.47693
154	RZPDp9028O074Q	PPM1G	RZPDp9028O074Q	0.353108	8.04253	2.93683	0.00745342	0.668556	-2.90085
2416	RZPDp9028O0912Q	RPSA	RZPDp9028O0912Q	-0.373132	7.60615	-1.61137	0.120865	0.749902	-4.29977
614	RZPDp9028E124Q	GDF15	RZPDp9028E124Q	0.352974	7.81981	2.34232	0.0282741	0.669829	-3.57523
667	RZPDp9028E144Q	IL4R	RZPDp9028E144Q	0.351488	7.65859	2.30643	0.0305298	0.669829	-3.61412
989	RZPDp9028B0717Q	PTPRC	RZPDp9028B0717Q	0.350673	6.99736	2.11804	0.0452951	0.669829	-3.81351
1479	RZPDp9027M1913Q	BRF2	RZPDp9027M1913Q	-0.368551	9.45621	-1.9068	0.0692315	0.701541	-4.02614
1380	RZPDp9027G0111Q	DCAF13	RZPDp9027G0111Q	-0.368531	8.92683	-1.94732	0.0639212	0.694228	-3.98635
99	RZPDp9027A1616Q	IKZF4	RZPDp9027A1616Q	0.348145	9.31925	3.09923	0.00509262	0.668556	-2.71016
18	RZPDp9027E031Q	DDX47	RZPDp9027E031Q	0.347394	8.68832	3.75159	0.00105296	0.668556	-1.93887
481	RZPDp9027M222Q	TUBGCP6	RZPDp9027M222Q	0.344532	9.15196	2.46802	0.0215296	0.668556	-3.43704
735	RZPDp9027D148Q	SH3BP5	RZPDp9027D148Q	0.341999	7.86531	2.26333	0.0334553	0.669829	-3.66046
78	RZPDp9027E091Q	BCL11A	RZPDp9027E091Q	0.34084	8.63142	3.21871	0.00383468	0.668556	-2.56905
340	RZPDp9027D1417Q	HSPA5	RZPDp9027D1417Q	0.33919	7.6097	2.60837	0.01578	0.668556	-3.27951
337	RZPDp9028M106Q	XPNPEP3	RZPDp9028M106Q	0.338477	8.00314	2.61106	0.0156854	0.668556	-3.27646
137	RZPDp9027J217Q	RAB14	RZPDp9027J217Q	0.338074	8.6614	2.97492	0.00682018	0.668556	-2.85628
4003	RZPDp9027I0511Q	RAB8A	RZPDp9027I0511Q	-0.366894	9.95858	-1.28969	0.210095	0.786738	-4.55939
232	RZPDp9028A055Q	HMGB2	RZPDp9028A055Q	0.337872	7.58267	2.7677	0.0110079	0.668556	-3.09729
1284	RZPDp9027L1713Q	SEPTIN7P14	RZPDp9027L1713Q	-0.365701	9.53805	-1.9913	0.0585672	0.681307	-3.94261
699	RZPDp9028E1011Q	FASN	RZPDp9028E1011Q	0.337536	7.60452	2.28656	0.0318481	0.669829	-3.63553
590	RZPDp9028N058Q	ZNRF1	RZPDp9028N058Q	0.336683	8.01501	2.36529	0.0269122	0.669829	-3.5502
281	RZPDp9028I2411Q	ZNF441	RZPDp9028I2411Q	0.335986	9.02062	2.69241	0.0130622	0.668556	-3.1838
843	RZPDp9028L016Q	SPON2	RZPDp9028L016Q	0.335485	7.17085	2.19958	0.0382527	0.669829	-3.72823
124	RZPDp9028C2411Q	TXNIP	RZPDp9028C2411Q	0.335147	7.69399	3.0019	0.00640307	0.668556	-2.82464
123	RZPDp9027K197Q	CSDE1	RZPDp9027K197Q	0.333811	8.3899	3.00357	0.00637804	0.668556	-2.82268
5	RZPDp9028A189Q	DECR2	RZPDp9028A189Q	0.333661	7.55294	4.21797	0.000332476	0.668556	-1.39772
424	RZPDp9028B175Q	EPN1	RZPDp9028B175Q	0.333341	7.65566	2.52031	0.0191911	0.668556	-3.37872
485	RZPDp9027M247Q	SRSF4	RZPDp9027M247Q	0.33329	8.10506	2.46492	0.0216764	0.669829	-3.44048
27	RZPDp9027J181Q	PPIB	RZPDp9027J181Q	0.332571	8.48588	3.6149	0.00147186	0.668556	-2.09997
711	RZPDp9028B088Q	NELL2	RZPDp9028B088Q	0.332201	7.96443	2.27862	0.0323897	0.669829	-3.64407
1460	RZPDp9028I0617Q	HLA-A	RZPDp9028I0617Q	-0.363015	8.00554	-1.91253	0.0684583	0.701198	-4.02055
416	RZPDp9028J0213Q	SP2	RZPDp9028J0213Q	0.332005	7.65184	2.52534	0.0189788	0.668556	-3.37308
505	RZPDp9028O0513Q	EP400	RZPDp9028O0513Q	0.331572	7.79686	2.44062	0.0228582	0.669829	-3.46741
292	RZPDp9027E094Q	PPM1B	RZPDp9027E094Q	0.33108	8.74108	2.66961	0.0137523	0.668556	-3.20985
851	RZPDp9028J0113Q	HAGH	RZPDp9028J0113Q	0.330584	7.18821	2.19459	0.0386537	0.669829	-3.7335
214	RZPDp9028M1416Q	HLA-C	RZPDp9028M1416Q	0.329631	7.36676	2.79886	0.0102504	0.668556	-3.0613
302	RZPDp9027E237Q	JOSD2	RZPDp9027E237Q	0.328866	8.23943	2.65868	0.0140953	0.668556	-3.22232
41	RZPDp9028G164Q	ANKLE2	RZPDp9028G164Q	0.327505	7.66029	3.428	0.00231882	0.668556	-2.32116
2528	RZPDp9028P1915Q	CBX4	RZPDp9028P1915Q	-0.36035	7.95195	-1.58324	0.127147	0.753307	-4.32418
629	RZPDp9027O014Q	FTH1	RZPDp9027O014Q	0.326741	9.24853	2.32513	0.0293345	0.669829	-3.59388
45	RZPDp9027E176Q	DNAJC7	RZPDp9027E176Q	0.326521	8.09164	3.37186	0.00265557	0.668556	-2.38767
1059	RZPDp9028I148Q	TOR1A	RZPDp9028I148Q	0.326512	7.36917	2.08917	0.0480556	0.669829	-3.8433
344	RZPDp9028J076Q	OS9	RZPDp9028J076Q	0.326407	7.63764	2.60011	0.0160738	0.668556	-3.28886
1075	RZPDp9027F084Q	DCTN2	RZPDp9027F084Q	0.325955	8.89618	2.08355	0.0486101	0.669829	-3.84907
25	RZPDp9027N174Q	ANK3	RZPDp9027N174Q	0.325742	9.36265	3.67307	0.00127661	0.668556	-2.03132
444	RZPDp9028J204Q	AKNA	RZPDp9028J204Q	0.325465	7.6785	2.49864	0.02013	0.668556	-3.40294
116	RZPDp9028N096Q	DVL2	RZPDp9028N096Q	0.324261	7.79433	3.04545	0.00578104	0.668556	-2.77349
744	RZPDp9027M224Q	TP53BP2	RZPDp9027M224Q	0.324174	9.39533	2.26045	0.0336599	0.669829	-3.66354
254	RZPDp9027J054Q	PKM	RZPDp9027J054Q	0.322035	9.28148	2.73168	0.0119492	0.668556	-3.13875
382	RZPDp9027J241Q	PUM1	RZPDp9027J241Q	0.321441	8.65045	2.56544	0.0173648	0.668556	-3.32801
77	RZPDp9028A177Q	MMP2	RZPDp9028A177Q	0.320662	7.82069	3.21995	0.00382333	0.668556	-2.56759
145	RZPDp9028B158Q	NMT1	RZPDp9028B158Q	0.32054	7.60319	2.94585	0.0072986	0.668556	-2.8903
229	RZPDp9027K201Q	C20orf27	RZPDp9027K201Q	0.320528	8.20319	2.76957	0.0109608	0.668556	-3.09513
285	RZPDp9027I057Q	MAP7D1	RZPDp9027I057Q	0.320069	8.28971	2.69063	0.0131147	0.668556	-3.18583
246	RZPDp9028A018Q	UBXN1	RZPDp9028A018Q	0.319705	7.3507	2.74547	0.0115801	0.668556	-3.1229
548	RZPDp9028K044Q	IGKC	RZPDp9028K044Q	0.319563	8.6784	2.40475	0.0247127	0.669829	-3.50697
4491	RZPDp9027D222Q	PPFIA3	RZPDp9027D222Q	-0.35236	8.85874	-1.20314	0.241273	0.805413	-4.62141
725	RZPDp9028C076Q	COL1A1	RZPDp9028C076Q	0.319544	8.3037	2.26926	0.0330382	0.669829	-3.65411
329	RZPDp9027B194Q	MYL6	RZPDp9027B194Q	0.319205	8.90436	2.6206	0.015354	0.668556	-3.26564
43	RZPDp9028A087Q	PAM	RZPDp9028A087Q	0.319007	7.75307	3.42621	0.00232887	0.668556	-2.32327
42	RZPDp9028A194Q	FN1	RZPDp9028A194Q	0.318927	8.04164	3.42628	0.00232849	0.668556	-2.32319
247	RZPDp9028M0511Q	PHF1	RZPDp9028M0511Q	0.318488	7.92616	2.74412	0.0116158	0.668556	-3.12445
1233	RZPDp9028M2021Q	RPL23	RZPDp9028M2021Q	-0.348186	8.77883	-2.01294	0.0560811	0.678323	-3.92088
1083	RZPDp9028K226Q	PAK2	RZPDp9028K226Q	0.317586	7.8065	2.08146	0.048818	0.669829	-3.85122
228	RZPDp9027N224Q	RTN4	RZPDp9027N224Q	0.317093	9.84387	2.76973	0.0109569	0.668556	-3.09495
842	RZPDp9028E244Q	MAP1B	RZPDp9028E244Q	0.316982	7.7409	2.19965	0.0382473	0.669829	-3.72816
1012	RZPDp9027B1410Q	PSMC4	RZPDp9027B1410Q	0.316724	9.56744	2.10777	0.0462611	0.669829	-3.82414
317	RZPDp9028I227Q	NPM3	RZPDp9028I227Q	0.316191	7.48614	2.6379	0.0147695	0.668556	-3.24599
115	RZPDp9028L147Q	MIOS	RZPDp9028L147Q	0.315497	7.30487	3.04969	0.00572362	0.668556	-2.7685
755	RZPDp9027E039Q	FGFR3	RZPDp9027E039Q	0.314529	8.59875	2.25405	0.0341179	0.669829	-3.67038
1997	RZPDp9027E0618Q	EME2	RZPDp9027E0618Q	-0.347218	8.71185	-1.72861	0.0974062	0.730179	-4.19484
528	RZPDp9028H039Q	G6PD	RZPDp9028H039Q	0.314467	8.04997	2.42241	0.023783	0.669829	-3.48752
1064	RZPDp9027E059Q	TRIO	RZPDp9027E059Q	0.313082	8.89152	2.08762	0.0482084	0.669829	-3.8449
486	RZPDp9027M037Q	MAP4	RZPDp9027M037Q	0.312993	8.01085	2.46167	0.0218313	0.669829	-3.44409
234	RZPDp9028D148Q	RPS2	RZPDp9028D148Q	0.312926	7.2329	2.76726	0.0110188	0.668556	-3.09779
175	RZPDp9027A2218Q	HSPB1	RZPDp9027A2218Q	0.312723	8.19216	2.87796	0.00854396	0.668556	-2.96952
874	RZPDp9028L026Q	RPS5	RZPDp9028L026Q	0.312335	7.22858	2.18673	0.0392926	0.669829	-3.74178
150	RZPDp9028J187Q	ZYX	RZPDp9028J187Q	0.312086	7.64458	2.94182	0.00736742	0.668556	-2.89502
258	RZPDp9028N208Q	NFKBIE	RZPDp9028N208Q	0.31125	7.94484	2.71777	0.0123326	0.668556	-3.15472
618	RZPDp9028H1815Q	ACRBP	RZPDp9028H1815Q	0.31092	7.55582	2.33653	0.0286275	0.669829	-3.58152
608	RZPDp9028K094Q	IGKC	RZPDp9028K094Q	0.309261	9.13144	2.34914	0.0278637	0.669829	-3.56782
148	RZPDp9028E206Q	PSMA2	RZPDp9028E206Q	0.309229	7.65074	2.94524	0.00730896	0.668556	-2.89102
506	RZPDp9027J065Q	KLC2	RZPDp9027J065Q	0.308678	9.2652	2.44035	0.0228718	0.669829	-3.46771
493	RZPDp9028N0116Q	DAG1	RZPDp9028N0116Q	0.308384	7.26385	2.45245	0.0222755	0.669829	-3.45431
653	RZPDp9028C1816Q	PLEKHJ1	RZPDp9028C1816Q	0.308122	7.35602	2.31084	0.0302438	0.669829	-3.60935
966	RZPDp9028N0815Q	KRT18	RZPDp9028N0815Q	0.307617	7.43892	2.13273	0.0439461	0.669829	-3.79827
1294	RZPDp9027E2013Q	TPT1	RZPDp9027E2013Q	-0.34153	8.92348	-1.98785	0.0589722	0.681307	-3.94606
559	RZPDp9027A219Q	ARID5A	RZPDp9027A219Q	0.307147	8.87752	2.39034	0.0254959	0.669829	-3.52279
428	RZPDp9027I043Q	PRIM1	RZPDp9027I043Q	0.306357	8.94181	2.5144	0.0194429	0.668556	-3.38533
856	RZPDp9028K1612Q	ZFP36L1	RZPDp9028K1612Q	0.305008	7.91307	2.19211	0.0388547	0.669829	-3.73612
1662	RZPDp9028K0921Q	TRIM38	RZPDp9028K0921Q	-0.341339	8.10989	-1.84294	0.0783841	0.703841	-4.0878
2518	RZPDp9027K1313Q	HES1	RZPDp9027K1313Q	-0.341301	10.264	-1.58588	0.126545	0.753116	-4.3219
3500	RZPDp9027C1815Q	BRAT1	RZPDp9027C1815Q	-0.34113	8.24713	-1.37309	0.183086	0.783523	-4.49635
1228	RZPDp9027O0115Q	OTUD1	RZPDp9027O0115Q	-0.339665	8.08069	-2.01759	0.0555599	0.678182	-3.9162
580	RZPDp9027B052Q	EXOSC8	RZPDp9027B052Q	0.30454	8.05363	2.37383	0.0264212	0.669829	-3.54087
2961	RZPDp9027A1317Q	IDH3B	RZPDp9027A1317Q	-0.338904	7.53666	-1.48553	0.151106	0.764092	-4.40651
1711	RZPDp9027M2113Q	PSMC2	RZPDp9027M2113Q	-0.338379	9.22554	-1.82844	0.0806034	0.706305	-4.10162
557	RZPDp9028P017Q	PIM2	RZPDp9028P017Q	0.303856	7.40935	2.39264	0.0253695	0.669829	-3.52027
472	RZPDp9028J2320Q	IGHM	RZPDp9028J2320Q	0.303113	7.76846	2.47468	0.0212179	0.668556	-3.42964
235	RZPDp9028J126Q	MYH14	RZPDp9028J126Q	0.302309	7.65419	2.76598	0.011051	0.668556	-3.09927
807	RZPDp9028J196Q	TRADD	RZPDp9028J196Q	0.301851	7.53759	2.22195	0.0365025	0.669829	-3.70456
385	RZPDp9028L2311Q	PEBP1	RZPDp9028L2311Q	0.301674	8.15998	2.56468	0.0173943	0.668556	-3.32888
1904	RZPDp9027C1718Q	TCOF1	RZPDp9027C1718Q	-0.336069	9.59854	-1.76027	0.0917798	0.72138	-4.16565
196	RZPDp9027N0816Q	TNFRSF25	RZPDp9027N0816Q	0.300843	10.112	2.83598	0.00941285	0.668556	-3.0183
1186	RZPDp9027C067Q	ATAD3A	RZPDp9027C067Q	-0.335195	9.84397	-2.03974	0.0531336	0.670849	-3.89379
519	RZPDp9027B1816Q	CCDC136	RZPDp9027B1816Q	0.3008	10.6865	2.42976	0.0234059	0.669829	-3.47942
1217	RZPDp9027E136Q	GDI1	RZPDp9027E136Q	-0.334752	7.98372	-2.0225	0.0550138	0.677323	-3.91124
1117	RZPDp9027J0712Q	DNAJC7	RZPDp9027J0712Q	-0.334697	10.1212	-2.06801	0.0501739	0.669829	-3.865
286	RZPDp9028J094Q	PCNT	RZPDp9028J094Q	0.300684	8.13314	2.69039	0.0131218	0.668556	-3.1861
459	RZPDp9028K036Q	CDH1	RZPDp9028K036Q	0.30058	8.36283	2.48443	0.0207687	0.668556	-3.41879
852	RZPDp9027B064Q	DOCK4	RZPDp9027B064Q	0.300087	8.2787	2.19405	0.0386973	0.669829	-3.73407
570	RZPDp9028G2213Q	CEP85L	RZPDp9028G2213Q	0.299723	8.39401	2.38363	0.0258684	0.669829	-3.53015
98	RZPDp9028O097Q	CEP72	RZPDp9028O097Q	0.299329	8.37433	3.10156	0.00506468	0.668556	-2.70741
140	RZPDp9027N073Q	SUGP1	RZPDp9027N073Q	0.299254	8.7089	2.9677	0.006936	0.668556	-2.86473
185	RZPDp9027E093Q	CCDC106	RZPDp9027E093Q	0.299058	8.5979	2.85488	0.00901185	0.668556	-2.99637
1013	RZPDp9027N014Q	PDCD6IP	RZPDp9027N014Q	0.299013	7.87738	2.1076	0.0462768	0.669829	-3.82431
91	RZPDp9027P241Q	RPL4	RZPDp9027P241Q	0.298598	8.37727	3.13137	0.00471972	0.668556	-2.67225
1366	RZPDp9027E2314Q	EIF2A	RZPDp9027E2314Q	-0.330147	9.13629	-1.95178	0.0633592	0.693924	-3.98194
1493	RZPDp9028O101Q	OPA1	RZPDp9028O101Q	-0.3296	9.37707	-1.90042	0.0701015	0.702767	-4.03236
2037	RZPDp9028K0718Q	FBXO44	RZPDp9028K0718Q	-0.329455	8.55546	-1.7163	0.0996719	0.733155	-4.20609
418	RZPDp9027E1412Q	IK	RZPDp9027E1412Q	0.298552	10.1437	2.5232	0.0190686	0.668556	-3.37547
705	RZPDp9027K1416Q	CTSK	RZPDp9027K1416Q	0.297922	9.0933	2.28377	0.0320373	0.669829	-3.63853
152	RZPDp9028E056Q	TRMT12	RZPDp9028E056Q	0.297899	7.29407	2.94072	0.00738625	0.668556	-2.8963
477	RZPDp9028O133Q	IGHG1	RZPDp9028O133Q	0.296467	9.32811	2.47133	0.021374	0.668556	-3.43336
460	RZPDp9027M0312Q	KTN1	RZPDp9027M0312Q	0.296086	7.79967	2.48375	0.0207999	0.668556	-3.41955
3450	RZPDp9027L0811Q	TTC5	RZPDp9027L0811Q	-0.32737	9.7554	-1.38173	0.180452	0.783523	-4.48964
918	RZPDp9028A2318Q	NARS1	RZPDp9028A2318Q	0.296043	6.76005	2.15659	0.0418324	0.669829	-3.7734
1158	RZPDp9027C0814Q	CNPPD1	RZPDp9027C0814Q	-0.326493	10.1173	-2.05031	0.0520086	0.669905	-3.88305
1925	RZPDp9028G2014Q	IPO4	RZPDp9028G2014Q	-0.325971	8.6282	-1.75191	0.0932361	0.725887	-4.17338
2392	RZPDp9027K1413Q	GPAA1	RZPDp9027K1413Q	-0.325916	9.54051	-1.61811	0.119398	0.747006	-4.29388
157	RZPDp9028L0310Q	MECP2	RZPDp9028L0310Q	0.295748	7.27753	2.93495	0.0074861	0.668556	-2.90304
87	RZPDp9028D1317Q	NRBP2	RZPDp9028D1317Q	0.295437	7.65407	3.1604	0.00440564	0.668556	-2.63798
188	RZPDp9028J1210Q	HSPA9	RZPDp9028J1210Q	0.294382	7.88345	2.84832	0.0091491	0.668556	-3.00398
205	RZPDp9027A091Q	EFEMP1	RZPDp9027A091Q	0.29381	8.18076	2.81419	0.00989638	0.668556	-3.04356
1795	RZPDp9027I0710Q	DRAP1	RZPDp9027I0710Q	-0.324012	9.50826	-1.79482	0.0859581	0.717103	-4.13339
2545	RZPDp9027C0511Q	DDIT4	RZPDp9027C0511Q	-0.323927	10.1197	-1.57885	0.128151	0.753661	-4.32796
1563	RZPDp9027C1016Q	MAP6	RZPDp9027C1016Q	-0.323711	9.54805	-1.8751	0.0736511	0.703841	-4.05691
504	RZPDp9028F1516Q	ZNF76	RZPDp9028F1516Q	0.293659	8.47634	2.44118	0.0228307	0.669829	-3.4668
74	RZPDp9027J064Q	KRT7	RZPDp9027J064Q	0.293292	8.98129	3.2261	0.00376762	0.668556	-2.56031
809	RZPDp9028I236Q	BOK	RZPDp9028I236Q	0.292941	7.36411	2.21902	0.0367279	0.669829	-3.70767
403	RZPDp9028E0115Q	SQSTM1	RZPDp9028E0115Q	0.292887	8.24903	2.54264	0.0182662	0.668556	-3.35367
740	RZPDp9028C107Q	RPL7A	RZPDp9028C107Q	0.292841	7.6363	2.26142	0.033591	0.669829	-3.66251
127	RZPDp9028F245Q	KLF4	RZPDp9028F245Q	0.292735	7.73343	2.99045	0.0065769	0.668556	-2.83806
376	RZPDp9027I082Q	GOLGB1	RZPDp9027I082Q	0.291799	8.71306	2.57214	0.0171081	0.668556	-3.32046
1845	RZPDp9027O1310Q	LCORL	RZPDp9027O1310Q	-0.321916	10.171	-1.77762	0.0888149	0.72138	-4.1495
2821	RZPDp9027M0611Q	CENPB	RZPDp9027M0611Q	-0.321811	9.24851	-1.51336	0.143935	0.762868	-4.38346
916	RZPDp9027J1410Q	FAM3A	RZPDp9027J1410Q	0.291352	9.40486	2.15714	0.0417846	0.669829	-3.77283
2393	RZPDp9027A2313Q	FAF1	RZPDp9027A2313Q	-0.321514	9.84813	-1.61806	0.119409	0.747006	-4.29392
2701	RZPDp9028I2316Q	ACSS1	RZPDp9028I2316Q	-0.320288	7.77371	-1.54324	0.136545	0.757747	-4.35835
391	RZPDp9027A182Q	PIGK	RZPDp9027A182Q	0.291043	8.63501	2.55892	0.0176185	0.668556	-3.33537
252	RZPDp9027M032Q	ACOT2	RZPDp9027M032Q	0.290809	8.01854	2.73374	0.0118934	0.668556	-3.13639
168	RZPDp9028B185Q	FTH1	RZPDp9028B185Q	0.289938	7.60733	2.89735	0.00816907	0.668556	-2.94694
1299	RZPDp9027M0917Q	IMPACT	RZPDp9027M0917Q	-0.318102	8.62221	-1.98577	0.0592178	0.681307	-3.94814
700	RZPDp9027J183Q	AZGP1	RZPDp9027J183Q	0.289859	8.9077	2.28654	0.0318498	0.669829	-3.63556
1293	RZPDp9027A1813Q	RPS29	RZPDp9027A1813Q	-0.316948	9.6226	-1.98787	0.0589702	0.681307	-3.94604
161	RZPDp9028N041Q	PACSIN3	RZPDp9028N041Q	0.289852	8.08367	2.9224	0.00770771	0.668556	-2.9177
902	RZPDp9027J158Q	SUPT5H	RZPDp9027J158Q	0.289231	9.49715	2.16141	0.0414162	0.669829	-3.76836
233	RZPDp9027J062Q	ZMYND8	RZPDp9027J062Q	0.289029	9.11985	2.76761	0.0110101	0.668556	-3.09739
239	RZPDp9027I033Q	ZNF266	RZPDp9027I033Q	0.288743	8.58637	2.75713	0.0112766	0.668556	-3.10948
1105	RZPDp9027E175Q	FBN3	RZPDp9027E175Q	0.288668	8.73486	2.07292	0.0496749	0.669829	-3.85997
1976	RZPDp9027G1711Q	PTPRM	RZPDp9027G1711Q	-0.315877	9.58337	-1.73555	0.0961478	0.728206	-4.18847
2258	RZPDp9027P136Q	PIK3R2	RZPDp9027P136Q	-0.315844	9.38719	-1.65018	0.112622	0.746045	-4.2656
1291	RZPDp9027D0912Q	ZNF577	RZPDp9027D0912Q	-0.315549	8.31319	-1.98826	0.0589238	0.681307	-3.94565
3391	RZPDp9027A1913Q	CEP57	RZPDp9027A1913Q	-0.31545	9.26267	-1.39084	0.177705	0.783523	-4.48253
1932	RZPDp9027L2012Q	RBM4	RZPDp9027L2012Q	-0.315428	9.47923	-1.749	0.0937497	0.726798	-4.17608
469	RZPDp9027G194Q	DDX42	RZPDp9027G194Q	0.288349	8.56877	2.47862	0.0210351	0.668556	-3.42525
310	RZPDp9028B0315Q	NOP2	RZPDp9028B0315Q	0.287957	8.24905	2.64966	0.0143844	0.668556	-3.2326
868	RZPDp9027G2115Q	PODXL2	RZPDp9027G2115Q	0.287953	9.25387	2.18835	0.0391604	0.669829	-3.74008
1164	RZPDp9027N2313Q	YPEL1	RZPDp9027N2313Q	-0.314321	8.81991	-2.04874	0.052175	0.669905	-3.88465
1586	RZPDp9027G1719Q	PPP2R2D	RZPDp9027G1719Q	-0.313961	8.45612	-1.86496	0.0751157	0.703841	-4.06669
1311	RZPDp9027G1312Q	SRP14	RZPDp9027G1312Q	-0.313085	9.30949	-1.98248	0.0596077	0.681307	-3.95143
388	RZPDp9028F1815Q	TNRC6B	RZPDp9028F1815Q	0.287349	7.49809	2.56191	0.0175016	0.668556	-3.33199
2106	RZPDp9027M1411Q	TERF2IP	RZPDp9027M1411Q	-0.312733	10.0276	-1.69618	0.103471	0.736618	-4.22436
2041	RZPDp9027I2415Q	OLA1	RZPDp9027I2415Q	-0.312672	9.11915	-1.71498	0.0999163	0.733669	-4.20729
575	RZPDp9028F1910Q	SUPT5H	RZPDp9028F1910Q	0.287132	7.94137	2.37523	0.0263418	0.669829	-3.53934
440	RZPDp9027F0215Q	HIP1R	RZPDp9027F0215Q	0.286929	9.16334	2.50196	0.0199833	0.668556	-3.39923
749	RZPDp9028E0414Q	TOP3B	RZPDp9028E0414Q	0.286917	7.80469	2.25849	0.0337998	0.669829	-3.66564
2374	RZPDp9027O0116Q	CAPN2	RZPDp9027O0116Q	-0.311039	8.82008	-1.62257	0.118436	0.747006	-4.28997
1518	RZPDp9027L0914Q	CWF19L1	RZPDp9027L0914Q	-0.310983	9.02363	-1.89044	0.071482	0.702767	-4.04206
4646	RZPDp9027L205Q	PRMT1	RZPDp9027L205Q	-0.310234	9.17762	-1.17542	0.251961	0.809527	-4.64052
343	RZPDp9028B156Q	DUSP10	RZPDp9028B156Q	0.286902	7.56425	2.60184	0.0160119	0.668556	-3.2869
1675	RZPDp9027B2313Q	RPS23	RZPDp9027B2313Q	-0.310192	9.48987	-1.8389	0.0789969	0.703841	-4.09166
1768	RZPDp9027K246Q	HSP90AB1	RZPDp9027K246Q	-0.310105	11.8166	-1.80528	0.0842606	0.714547	-4.12355
172	RZPDp9027A064Q	TMEM131	RZPDp9027A064Q	0.285001	8.50603	2.88678	0.00837145	0.668556	-2.95925
237	RZPDp9027I184Q	CSRP1	RZPDp9027I184Q	0.284924	8.83801	2.76134	0.0111689	0.668556	-3.10463
988	RZPDp9028M144Q	EEF1B2	RZPDp9028M144Q	0.284766	7.30006	2.11816	0.0452844	0.669829	-3.81339
3529	RZPDp9027L238Q	LSM14B	RZPDp9027L238Q	-0.309559	8.88112	-1.36772	0.184737	0.784343	-4.5005
2320	RZPDp9028E1020Q	SGSH	RZPDp9028E1020Q	-0.309258	8.17749	-1.63528	0.115728	0.746045	-4.27878
540	RZPDp9028B087Q	P2RX7	RZPDp9028B087Q	0.284678	7.63335	2.41003	0.0244312	0.669829	-3.50116
553	RZPDp9028K224Q	FN1	RZPDp9028K224Q	0.284616	7.90311	2.39749	0.0251044	0.669829	-3.51494
1426	RZPDp9027C1414Q	CNTN1	RZPDp9027C1414Q	-0.30857	9.57605	-1.92389	0.0669471	0.701198	-4.00942
346	RZPDp9028N196Q	ALDOA	RZPDp9028N196Q	0.284554	7.68202	2.5989	0.0161174	0.668556	-3.29023
652	RZPDp9027F151Q	RAD23A	RZPDp9027F151Q	0.28398	7.9923	2.31195	0.0301722	0.669829	-3.60815
164	RZPDp9027M145Q	BRD9	RZPDp9027M145Q	0.283949	8.15144	2.9139	0.00786133	0.668556	-2.92762
371	RZPDp9027F063Q	YPEL3	RZPDp9027F063Q	0.283742	8.90015	2.57734	0.0169112	0.668556	-3.3146
3668	RZPDp9027A089Q	SAFB	RZPDp9027A089Q	-0.308024	9.54888	-1.3435	0.192335	0.784382	-4.51907
1527	RZPDp9028B0620Q	RPS11	RZPDp9028B0620Q	-0.307858	9.63183	-1.88733	0.0719177	0.702767	-4.04508
2245	RZPDp9027I0311Q	LCMT1	RZPDp9027I0311Q	-0.307589	9.49916	-1.65378	0.111883	0.746045	-4.2624
1101	RZPDp9028L0710Q	ZNF687	RZPDp9028L0710Q	0.283711	8.59509	2.0748	0.0494852	0.669829	-3.85805
121	RZPDp9028B017Q	E2F4	RZPDp9028B017Q	0.283409	7.53793	3.01887	0.00615337	0.668556	-2.80472
1727	RZPDp9027E2113Q	RAF1	RZPDp9027E2113Q	-0.307388	8.91698	-1.82121	0.0817301	0.708934	-4.10849
768	RZPDp9027I034Q	LRP3	RZPDp9027I034Q	0.283098	8.82365	2.24382	0.034862	0.669829	-3.6813
278	RZPDp9027I0212Q	PSMD10	RZPDp9027I0212Q	0.28264	8.19941	2.69948	0.0128547	0.668556	-3.1757
3058	RZPDp9027P247Q	BAG5	RZPDp9027P247Q	-0.305901	8.23203	-1.46357	0.15697	0.769408	-4.42449
315	RZPDp9027I126Q	POLR3K	RZPDp9027I126Q	0.28251	8.78342	2.6406	0.0146803	0.668556	-3.24292
1494	RZPDp9027O0315Q	CHD3	RZPDp9027O0315Q	-0.30557	9.73049	-1.90032	0.070116	0.702767	-4.03246
362	RZPDp9027M171Q	KIAA1522	RZPDp9027M171Q	0.282135	8.16598	2.58497	0.0166262	0.668556	-3.30598
1273	RZPDp9028K0821Q	CNN2	RZPDp9028K0821Q	-0.304888	7.46562	-1.99713	0.0578885	0.681307	-3.93677
1076	RZPDp9027A036Q	SMARCE1	RZPDp9027A036Q	0.282116	8.66202	2.08328	0.0486367	0.669829	-3.84935
1797	RZPDp9027M0114Q	NELL2	RZPDp9027M0114Q	-0.304864	9.19078	-1.79401	0.0860916	0.717103	-4.13415
2126	RZPDp9027I1613Q	TTC21B	RZPDp9027I1613Q	-0.30475	9.40396	-1.69036	0.104594	0.736793	-4.22963
1468	RZPDp9027O0813Q	EIF4G1	RZPDp9027O0813Q	-0.30458	8.98569	-1.91088	0.0686793	0.701229	-4.02215
576	RZPDp9027L081Q	BRD2	RZPDp9027L081Q	0.281654	7.71647	2.375	0.0263547	0.669829	-3.53959
2407	RZPDp9027H0811Q	ZC3H15	RZPDp9027H0811Q	-0.304265	8.39677	-1.61406	0.120276	0.749137	-4.29742
2568	RZPDp9027I1913Q	ATP6V1E1	RZPDp9027I1913Q	-0.304015	10.1961	-1.57334	0.129422	0.754853	-4.3327
522	RZPDp9027D176Q	PMS2	RZPDp9027D176Q	0.281197	8.54809	2.42843	0.0234738	0.669829	-3.48089
2253	RZPDp9027M1315Q	RASSF2	RZPDp9027M1315Q	-0.303919	8.53846	-1.65127	0.112398	0.746045	-4.26463
2365	RZPDp9027H2211Q	FBXW5	RZPDp9027H2211Q	-0.303866	9.09782	-1.62432	0.11806	0.747006	-4.28843
977	RZPDp9028O111Q	IGHM	RZPDp9028O111Q	0.281144	8.70418	2.12419	0.0447265	0.669829	-3.80714
1127	RZPDp9027K109Q	ZNF658	RZPDp9027K109Q	-0.303653	8.75709	-2.0661	0.0503693	0.669829	-3.86695
1043	RZPDp9027E182Q	HPS1	RZPDp9027E182Q	0.281027	9.31135	2.09371	0.0476124	0.669829	-3.83864
2201	RZPDp9027H0516Q	RALGDS	RZPDp9027H0516Q	-0.302721	11.0295	-1.66566	0.10947	0.744134	-4.25181
57	RZPDp9028H0718Q	DHX37	RZPDp9028H0718Q	0.27952	6.8872	3.30263	0.00313691	0.668556	-2.46971
658	RZPDp9028H014Q	UBN1	RZPDp9028H014Q	0.279483	7.73667	2.30927	0.0303456	0.669829	-3.61105
894	RZPDp9027B027Q	USF2	RZPDp9027B027Q	0.279476	8.94946	2.16582	0.0410393	0.669829	-3.76374
1023	RZPDp9028G167Q	NAA10	RZPDp9028G167Q	0.279461	7.3575	2.10139	0.0468695	0.669829	-3.83072
2375	RZPDp9027A2413Q	FBL	RZPDp9027A2413Q	-0.301877	9.45939	-1.62158	0.118649	0.747006	-4.29084
129	RZPDp9028F048Q	UBQLN1	RZPDp9028F048Q	0.279341	8.3816	2.98854	0.00660641	0.668556	-2.84031
1223	RZPDp9028P0716Q	RPS26	RZPDp9028P0716Q	-0.301567	8.20939	-2.01992	0.0553006	0.677855	-3.91385
636	RZPDp9028J0216Q	CDC25B	RZPDp9028J0216Q	0.27881	8.00639	2.32102	0.0295935	0.669829	-3.59834
746	RZPDp9028M185Q	CDH3	RZPDp9028M185Q	0.278417	7.73709	2.26014	0.0336821	0.669829	-3.66388
265	RZPDp9028N1114Q	SP2	RZPDp9028N1114Q	0.278305	7.009	2.71223	0.0124889	0.668556	-3.16109
322	RZPDp9028A104Q	CRIP1	RZPDp9028A104Q	0.278125	8.19885	2.6301	0.0150303	0.668556	-3.25485
1005	RZPDp9028I2317Q	VAV1	RZPDp9028I2317Q	0.277434	7.39669	2.10991	0.0460578	0.669829	-3.82192
643	RZPDp9027D147Q	FNBP4	RZPDp9027D147Q	0.277331	8.02583	2.31714	0.0298401	0.669829	-3.60254
660	RZPDp9028E224Q	ZNF787	RZPDp9028E224Q	0.277251	8.33567	2.30795	0.0304308	0.669829	-3.61247
1220	RZPDp9027P215Q	MAD2L1BP	RZPDp9027P215Q	-0.299175	8.4931	-2.0213	0.0551467	0.677323	-3.91245
1516	RZPDp9027L0911Q	MDH1	RZPDp9027L0911Q	-0.298909	9.89867	-1.89082	0.0714288	0.702767	-4.04169
1134	RZPDp9027A1113Q	ADNP	RZPDp9027A1113Q	-0.298881	9.39318	-2.06166	0.0508257	0.669905	-3.87149
181	RZPDp9028E0311Q	SQSTM1	RZPDp9028E0311Q	0.277108	8.29898	2.85833	0.00894022	0.668556	-2.99235
925	RZPDp9027D035Q	FXR2	RZPDp9027D035Q	0.27672	8.36317	2.15149	0.0422757	0.669829	-3.77872
1609	RZPDp9027A2013Q	PRKD2	RZPDp9027A2013Q	-0.298424	9.06744	-1.85856	0.0760537	0.703841	-4.07284
754	RZPDp9028N1410Q	CAPG	RZPDp9028N1410Q	0.27646	8.08309	2.2557	0.0339989	0.669829	-3.66861
996	RZPDp9028E2010Q	ZNF496	RZPDp9028E2010Q	0.276441	7.59202	2.11554	0.045529	0.669829	-3.8161
659	RZPDp9028C077Q	ARID4A	RZPDp9028C077Q	0.276048	7.62432	2.3084	0.0304018	0.669829	-3.61199
248	RZPDp9027N054Q	TPM1	RZPDp9027N054Q	0.275457	8.62141	2.74199	0.0116723	0.668556	-3.1269
1157	RZPDp9028L211Q	GALNT10	RZPDp9028L211Q	-0.297788	7.90762	-2.05057	0.0519816	0.669905	-3.88279
1601	RZPDp9027I0513Q	PPP1CC	RZPDp9027I0513Q	-0.297691	8.84865	-1.86039	0.0757841	0.703841	-4.07108
466	RZPDp9028F119Q	PTPN7	RZPDp9028F119Q	0.275291	7.74901	2.48191	0.0208838	0.668556	-3.42159
1329	RZPDp9027I0613Q	UBE2B	RZPDp9027I0613Q	-0.297008	8.57012	-1.9748	0.0605276	0.681699	-3.95909
1606	RZPDp9027M1811Q	SEZ6L2	RZPDp9027M1811Q	-0.296821	9.82179	-1.85969	0.0758874	0.703841	-4.07176
209	RZPDp9027J086Q	NDRG1	RZPDp9027J086Q	0.275101	8.624	2.80371	0.0101371	0.668556	-3.05569
820	RZPDp9028A142Q	MAEA	RZPDp9028A142Q	0.273897	8.36505	2.21194	0.0372764	0.669829	-3.71516
562	RZPDp9028E084Q	MEA1	RZPDp9028E084Q	0.273883	7.73419	2.3886	0.0255922	0.669829	-3.5247
728	RZPDp9028M0811Q	ADH5	RZPDp9028M0811Q	0.273823	7.46131	2.26876	0.033073	0.669829	-3.65464
420	RZPDp9028A174Q	HLA-C	RZPDp9028A174Q	0.273512	8.07376	2.52256	0.0190956	0.668556	-3.37619
909	RZPDp9028N064Q	SIPA1L3	RZPDp9028N064Q	0.27288	7.71989	2.15883	0.0416387	0.669829	-3.77106
607	RZPDp9028A026Q	NACA	RZPDp9028A026Q	0.272452	7.47749	2.34926	0.027856	0.669829	-3.56768
817	RZPDp9028J219Q	CNOT3	RZPDp9028J219Q	0.272091	7.60269	2.21479	0.0370549	0.669829	-3.71215
2671	RZPDp9027L1119Q	CLN5	RZPDp9027L1119Q	-0.29391	8.28796	-1.55121	0.134628	0.755366	-4.35159
1690	RZPDp9027E1913Q	PNCK	RZPDp9027E1913Q	-0.293899	9.4061	-1.83557	0.0795059	0.703841	-4.09484
1343	RZPDp9027G1513Q	OGG1	RZPDp9027G1513Q	-0.293823	9.27496	-1.96567	0.0616377	0.686029	-3.96818
654	RZPDp9027L112Q	PPP1R35	RZPDp9027L112Q	0.271871	8.78831	2.31022	0.0302841	0.669829	-3.61003
1642	RZPDp9027E2018Q	PLD3	RZPDp9027E2018Q	-0.293616	8.92836	-1.84766	0.0776742	0.703841	-4.08329
634	RZPDp9028B085Q	PLCB4	RZPDp9028B085Q	0.271463	7.83038	2.32291	0.0294745	0.669829	-3.5963
2288	RZPDp9027J1110Q	PPP2R1A	RZPDp9027J1110Q	-0.293328	9.24702	-1.64383	0.113938	0.746045	-4.27123
4716	RZPDp9027K161Q	SYNE2	RZPDp9027K161Q	-0.293312	8.5281	-1.16668	0.255403	0.809527	-4.64647
1165	RZPDp9027I0515Q	LRRC4B	RZPDp9027I0515Q	-0.292968	9.0051	-2.04852	0.0521975	0.669905	-3.88487
1933	RZPDp9027N1211Q	SMPD4	RZPDp9027N1211Q	-0.292962	9.85801	-1.74868	0.0938053	0.726798	-4.17637
1532	RZPDp9028K1614Q	RARA	RZPDp9028K1614Q	-0.292614	7.84415	-1.88547	0.0721795	0.702767	-4.04688
1576	RZPDp9027O109Q	SUCLG1	RZPDp9027O109Q	-0.29243	8.64501	-1.86981	0.0744126	0.703841	-4.06202
834	RZPDp9028A024Q	CREB3L1	RZPDp9028A024Q	0.271145	8.99608	2.20286	0.037992	0.669829	-3.72477
1878	RZPDp9027A1016Q	FDFT1	RZPDp9027A1016Q	-0.291971	9.73675	-1.76607	0.0907781	0.72138	-4.16025
331	RZPDp9028D021Q	TRIM28	RZPDp9028D021Q	0.271064	7.18476	2.61997	0.0153754	0.668556	-3.26635
1882	RZPDp9028E232Q	PCDH12	RZPDp9028E232Q	-0.291695	7.57089	-1.76515	0.0909372	0.72138	-4.16112
1269	RZPDp9027L0618Q	TBR1	RZPDp9027L0618Q	-0.291677	8.50273	-2.00026	0.057526	0.679423	-3.93363
1820	RZPDp9027I1713Q	COPA	RZPDp9027I1713Q	-0.291554	9.07392	-1.78405	0.0877383	0.72138	-4.14349
1934	RZPDp9027I1513Q	WSB1	RZPDp9027I1513Q	-0.290725	9.44902	-1.74859	0.0938213	0.726798	-4.17645
499	RZPDp9027A042Q	FBXL16	RZPDp9027A042Q	0.269991	8.73194	2.4463	0.0225771	0.669829	-3.46113
2262	RZPDp9027O1214Q	AP3B2	RZPDp9027O1214Q	-0.290432	10.2089	-1.64902	0.112861	0.746045	-4.26663
2750	RZPDp9027F2212Q	DUSP8	RZPDp9027F2212Q	-0.290277	9.85023	-1.52932	0.139947	0.762868	-4.37009
592	RZPDp9028P0110Q	KMT2C	RZPDp9028P0110Q	0.26991	7.15654	2.36428	0.0269706	0.669829	-3.5513
219	RZPDp9027M197Q	CNKSR3	RZPDp9027M197Q	0.269292	8.07675	2.78569	0.0105643	0.668556	-3.07653
259	RZPDp9028B106Q	DET1	RZPDp9028B106Q	0.269248	7.77473	2.71678	0.0123604	0.668556	-3.15586
885	RZPDp9028A028Q	SLX1A	RZPDp9028A028Q	0.26915	7.29099	2.1721	0.0405077	0.669829	-3.75716
261	RZPDp9028M126Q	ZNF775	RZPDp9028M126Q	0.268138	7.35752	2.71512	0.0124072	0.668556	-3.15777
3115	RZPDp9027I0115Q	MED7	RZPDp9027I0115Q	-0.288292	9.99124	-1.44818	0.161185	0.775194	-4.43695
202	RZPDp9028L0315Q	EIF3M	RZPDp9028L0315Q	0.26808	7.05987	2.82168	0.00972762	0.668556	-3.03489
1252	RZPDp9027I1011Q	EEF1G	RZPDp9027I1011Q	-0.287622	9.19905	-2.00783	0.05666	0.678517	-3.92603
2230	RZPDp9027K0216Q	TMEM98	RZPDp9027K0216Q	-0.287621	8.99196	-1.65778	0.111066	0.746045	-4.25884
279	RZPDp9028I224Q	CLU	RZPDp9028I224Q	0.2677	7.88331	2.69598	0.0129571	0.668556	-3.17971
1332	RZPDp9027D2213Q	TTC5	RZPDp9027D2213Q	-0.286775	8.72088	-1.97412	0.0606102	0.681699	-3.95977
1421	RZPDp9027L0712Q	POLR2G	RZPDp9027L0712Q	-0.286627	8.708	-1.92545	0.0667415	0.701198	-4.00789
61	RZPDp9027B173Q	SH3BGRL3	RZPDp9027B173Q	0.267612	8.88317	3.26922	0.00339853	0.668556	-2.50927
3094	RZPDp9027B2311Q	IRF1	RZPDp9027B2311Q	-0.286219	10.6294	-1.45335	0.15976	0.774103	-4.43278
1272	RZPDp9027A1011Q	HNRNPLL	RZPDp9027A1011Q	-0.285864	9.94014	-1.99723	0.0578763	0.681307	-3.93667
2681	RZPDp9027E2111Q	RPS11	RZPDp9027E2111Q	-0.285752	9.02657	-1.54813	0.135366	0.756774	-4.3542
412	RZPDp9028F096Q	FAM91A1	RZPDp9028F096Q	0.267457	7.8892	2.53617	0.0185295	0.668556	-3.36093
1085	RZPDp9028O186Q	MAPK8IP3	RZPDp9028O186Q	0.267386	8.49555	2.08087	0.0488765	0.669829	-3.85182
1280	RZPDp9027A1912Q	DCAF10	RZPDp9027A1912Q	-0.28462	8.49473	-1.99289	0.0583817	0.681307	-3.94102
133	RZPDp9027J097Q	TMEM256-PLSCR3	RZPDp9027J097Q	0.26722	8.74572	2.98136	0.00671825	0.668556	-2.84873
179	RZPDp9028D025Q	KEAP1	RZPDp9028D025Q	0.267195	8.24111	2.86026	0.00890063	0.668556	-2.99011
393	RZPDp9028L145Q	PLOD3	RZPDp9028L145Q	0.26674	8.09131	2.55728	0.0176826	0.668556	-3.33721
451	RZPDp9027L191Q	PMF1	RZPDp9027L191Q	0.26653	9.354	2.49224	0.0204154	0.668556	-3.41008
2102	RZPDp9027I0813Q	SSPOP	RZPDp9027I0813Q	-0.283876	9.49295	-1.69689	0.103336	0.736618	-4.22373
1020	RZPDp9028O057Q	NCK2	RZPDp9028O057Q	0.266406	7.76689	2.10285	0.0467296	0.669829	-3.82921
280	RZPDp9027J2412Q	SUGP2	RZPDp9027J2412Q	0.266312	9.68694	2.69365	0.0130254	0.668556	-3.18237
1505	RZPDp9027P2218Q	ZNF71	RZPDp9027P2218Q	-0.283447	7.91177	-1.89436	0.0709369	0.702767	-4.03825
1481	RZPDp9028L1615Q	TRIB2	RZPDp9028L1615Q	-0.283387	7.3907	-1.90601	0.069339	0.701834	-4.02691
2617	RZPDp9027G2017Q	COG4	RZPDp9027G2017Q	-0.282833	8.23013	-1.56075	0.132364	0.75511	-4.34347
1704	RZPDp9027O0817Q	KMT5B	RZPDp9027O0817Q	-0.282768	8.66519	-1.8318	0.0800845	0.703841	-4.09843
400	RZPDp9028J036Q	MXRA5	RZPDp9028J036Q	0.266266	7.60417	2.54739	0.0180748	0.668556	-3.34833
4413	RZPDp9028I103Q	NCOR2	RZPDp9028I103Q	-0.282039	7.34403	-1.21578	0.236513	0.802976	-4.61258
304	RZPDp9028E238Q	NPIPB12	RZPDp9028E238Q	0.265199	7.15029	2.65755	0.0141311	0.668556	-3.22361
765	RZPDp9027N0119Q	PRDM8	RZPDp9027N0119Q	0.264674	9.04278	2.24798	0.0345575	0.669829	-3.67686
350	RZPDp9028B084Q	ATXN2L	RZPDp9028B084Q	0.26389	7.84471	2.59669	0.0161972	0.668556	-3.29273
938	RZPDp9027H152Q	RBM39	RZPDp9027H152Q	0.263296	8.91075	2.14501	0.0428463	0.669829	-3.78549
6246	RZPDp9027J094Q	SPTBN1	RZPDp9027J094Q	-0.281074	8.7063	-0.94883	0.352661	0.845505	-4.78229
762	RZPDp9028F218Q	ATXN2L	RZPDp9028F218Q	0.262979	7.94482	2.2493	0.0344619	0.669829	-3.67546
1643	RZPDp9028L1020Q	FAU	RZPDp9028L1020Q	-0.280227	7.96059	-1.8468	0.077802	0.703841	-4.08411
456	RZPDp9028P127Q	CMTR1	RZPDp9028P127Q	0.262298	7.74694	2.48639	0.0206795	0.668556	-3.4166
4071	RZPDp9027I1413Q	DCTN6	RZPDp9027I1413Q	-0.279768	9.53951	-1.27707	0.214435	0.789737	-4.56865
871	RZPDp9028J047Q	PRRC1	RZPDp9028J047Q	0.262251	8.3279	2.18799	0.0391899	0.669829	-3.74046
2149	RZPDp9027I2013Q	LIAS	RZPDp9027I2013Q	-0.279724	8.58045	-1.68236	0.106152	0.740111	-4.23683
908	RZPDp9027M092Q	RBM15B	RZPDp9027M092Q	0.262242	8.83385	2.15917	0.0416089	0.669829	-3.7707
1091	RZPDp9028E096Q	PHF3	RZPDp9028E096Q	0.262213	7.53524	2.07845	0.0491183	0.669829	-3.8543
2851	RZPDp9027A128Q	RAN	RZPDp9027A128Q	-0.279467	8.95075	-1.50738	0.145452	0.762868	-4.38844
1512	RZPDp9027I0919Q	TMEM25	RZPDp9027I0919Q	-0.279348	8.05494	-1.89237	0.0712142	0.702767	-4.04019
822	RZPDp9027N028Q	PJA1	RZPDp9027N028Q	0.261842	9.07149	2.2116	0.0373029	0.669829	-3.71552
2282	RZPDp9027D0811Q	SLC25A1	RZPDp9027D0811Q	-0.279138	9.56834	-1.64506	0.113683	0.746045	-4.27014
2042	RZPDp9027M021Q	SPAG7	RZPDp9027M021Q	-0.278853	8.37953	-1.71479	0.0999517	0.733669	-4.20746
1206	RZPDp9027N0716Q	NAT9	RZPDp9027N0716Q	-0.278812	9.50058	-2.02957	0.0542353	0.673795	-3.90409
4706	RZPDp9027I018Q	NUF2	RZPDp9027I018Q	-0.278422	8.42658	-1.16831	0.254758	0.809527	-4.64536
2401	RZPDp9027B1810Q	EEF2	RZPDp9027B1810Q	-0.277782	9.15754	-1.61685	0.119671	0.747281	-4.29498
4024	RZPDp9027O2415Q	DYNC1I2	RZPDp9027O2415Q	-0.277714	9.37581	-1.28578	0.211432	0.787459	-4.56227
2699	RZPDp9027E1111Q	YWHAE	RZPDp9027E1111Q	-0.277584	9.66226	-1.54353	0.136477	0.757747	-4.35811
1660	RZPDp9027L0418Q	LAMB1	RZPDp9027L0418Q	-0.277516	7.76488	-1.84342	0.078312	0.703841	-4.08735
1095	RZPDp9027M014Q	NUCB1	RZPDp9027M014Q	0.261723	8.69237	2.07712	0.0492519	0.669829	-3.85567
4590	RZPDp9027L2011Q	SPON2	RZPDp9027L2011Q	-0.277168	10.544	-1.18523	0.24814	0.809527	-4.6338
907	RZPDp9028P194Q	ADAMTS16	RZPDp9028P194Q	0.261427	7.66512	2.15983	0.0415525	0.669829	-3.77002
348	RZPDp9028J186Q	CFB	RZPDp9028J186Q	0.260052	7.59372	2.59733	0.016174	0.668556	-3.29201
457	RZPDp9027M213Q	ZNF777	RZPDp9027M213Q	0.259258	8.37531	2.48528	0.0207301	0.668556	-3.41784
2756	RZPDp9027D0517Q	TP53I11	RZPDp9027D0517Q	-0.277028	9.52342	-1.52723	0.140464	0.762868	-4.37184
1230	RZPDp9027K2012Q	FADS1	RZPDp9027K2012Q	-0.276971	9.05284	-2.01677	0.0556519	0.678323	-3.91703
628	RZPDp9027B112Q	COPA	RZPDp9027B112Q	0.258673	8.36031	2.32518	0.0293314	0.669829	-3.59383
345	RZPDp9027A073Q	GNAS	RZPDp9027A073Q	0.258508	7.95828	2.59983	0.0160839	0.668556	-3.28918
949	RZPDp9028N218Q	KLHDC4	RZPDp9028N218Q	0.258371	7.4985	2.14118	0.0431868	0.669829	-3.78948
517	RZPDp9027H039Q	RPS9	RZPDp9027H039Q	0.258317	7.69103	2.43007	0.0233899	0.669829	-3.47907
1636	RZPDp9027E229Q	FAM149A	RZPDp9027E229Q	-0.276495	8.66057	-1.84913	0.077453	0.703841	-4.08188
333	RZPDp9028B215Q	COL5A1	RZPDp9028B215Q	0.258298	7.77562	2.61894	0.0154111	0.668556	-3.26752
1417	RZPDp9027L2113Q	HECTD4	RZPDp9027L2113Q	-0.276275	8.6877	-1.92801	0.0664054	0.701198	-4.00537
380	RZPDp9028G046Q	GNB2	RZPDp9028G046Q	0.258279	7.31974	2.56883	0.0172345	0.668556	-3.3242
487	RZPDp9027A206Q	ZNF408	RZPDp9027A206Q	0.257768	8.91927	2.45798	0.0220083	0.669829	-3.44819
2093	RZPDp9027P238Q	FKBP1A	RZPDp9027P238Q	-0.275948	9.55392	-1.699	0.102932	0.736618	-4.22182
1568	RZPDp9027F059Q	RFX1	RZPDp9027F059Q	-0.275792	10.0248	-1.87274	0.0739904	0.703841	-4.05919
249	RZPDp9027N152Q	DPF2	RZPDp9027N152Q	0.257713	8.77376	2.73616	0.0118281	0.668556	-3.1336
1507	RZPDp9027P0914Q	HADHA	RZPDp9027P0914Q	-0.275439	9.27668	-1.8935	0.0710573	0.702767	-4.03909
952	RZPDp9028E064Q	ATN1	RZPDp9028E064Q	0.257633	7.87685	2.1397	0.0433186	0.669829	-3.79102
409	RZPDp9028I126Q	FLNB	RZPDp9028I126Q	0.257269	7.69558	2.53931	0.0184016	0.668556	-3.35742
1243	RZPDp9027D1610Q	MARCHF2	RZPDp9027D1610Q	-0.274812	8.68475	-2.01031	0.0563787	0.678323	-3.92353
2209	RZPDp9027N027Q	OAZ1	RZPDp9027N027Q	-0.274727	8.3989	-1.66458	0.109687	0.744134	-4.25277
1566	RZPDp9027B2013Q	IGF2R	RZPDp9027B2013Q	-0.274664	9.56354	-1.87286	0.0739724	0.703841	-4.05907
1868	RZPDp9027P132Q	HADH	RZPDp9027P132Q	-0.274653	9.01005	-1.76911	0.090258	0.72138	-4.15743
896	RZPDp9027C0420Q	CTAG1A	RZPDp9027C0420Q	0.257179	8.0855	2.16526	0.0410866	0.669829	-3.76433
463	RZPDp9027L044Q	RPSA	RZPDp9027L044Q	0.257159	8.62092	2.48305	0.0208317	0.668556	-3.42032
726	RZPDp9027B164Q	HLA-A	RZPDp9027B164Q	0.257082	8.67923	2.2692	0.0330426	0.669829	-3.65417
2853	RZPDp9027C2015Q	HIP1R	RZPDp9027C2015Q	-0.27378	9.94792	-1.5071	0.145522	0.762868	-4.38867
334	RZPDp9028M147Q	SELENOS	RZPDp9028M147Q	0.257005	7.27234	2.61677	0.0154859	0.668556	-3.26998
621	RZPDp9027I153Q	WDR13	RZPDp9027I153Q	0.256245	8.27643	2.33241	0.0288813	0.669829	-3.586
2753	RZPDp9028M0712Q	LLGL1	RZPDp9028M0712Q	-0.273217	7.18933	-1.52807	0.140256	0.762868	-4.37114
3270	RZPDp9027O1217Q	TRIM28	RZPDp9027O1217Q	-0.272732	8.39045	-1.41406	0.170861	0.783264	-4.46424
1348	RZPDp9027N1219Q	DHX37	RZPDp9027N1219Q	-0.272629	8.32885	-1.96516	0.0616992	0.686029	-3.96867
1587	RZPDp9028H0814Q	CCNDBP1	RZPDp9028H0814Q	-0.272584	7.41942	-1.86478	0.0751424	0.703841	-4.06686
2312	RZPDp9027O0811Q	RTF2	RZPDp9027O0811Q	-0.272499	9.94776	-1.6372	0.115324	0.746045	-4.27709
372	RZPDp9028N177Q	TNFRSF4	RZPDp9028N177Q	0.25623	7.50171	2.57728	0.0169137	0.668556	-3.31467
82	RZPDp9028B066Q	ANKS1A	RZPDp9028B066Q	0.255952	7.86691	3.18946	0.00411149	0.668556	-2.60364
3988	RZPDp9027P1917Q	PSMA4	RZPDp9027P1917Q	-0.272132	9.53488	-1.29309	0.208936	0.785501	-4.55688
2019	RZPDp9027L085Q	PRKAR1B	RZPDp9027L085Q	-0.271687	8.6375	-1.72177	0.0986585	0.732332	-4.20109
300	RZPDp9028I027Q	CCDC115	RZPDp9028I027Q	0.255777	7.54161	2.66012	0.0140495	0.668556	-3.22068
431	RZPDp9027A121Q	ENSA	RZPDp9027A121Q	0.255084	8.56138	2.51092	0.0195927	0.668556	-3.38922
356	RZPDp9028I1210Q	MEGF8	RZPDp9028I1210Q	0.254932	7.58569	2.58965	0.0164537	0.668556	-3.30069
1342	RZPDp9027L2216Q	SF3B3	RZPDp9027L2216Q	-0.270399	8.86632	-1.9658	0.0616216	0.686029	-3.96805
1837	RZPDp9028B1717Q	PDLIM5	RZPDp9028B1717Q	-0.270292	6.88559	-1.77885	0.0886079	0.72138	-4.14835
591	RZPDp9028L127Q	LDLR	RZPDp9028L127Q	0.254137	7.80748	2.36521	0.0269167	0.669829	-3.55029
1733	RZPDp9027D134Q	RIOK2	RZPDp9027D134Q	-0.269645	8.71269	-1.81941	0.082013	0.708934	-4.11019
1359	RZPDp9027H2017Q	GSTA4	RZPDp9027H2017Q	-0.269447	7.75768	-1.95735	0.0626634	0.691327	-3.97642
223	RZPDp9027L232Q	C17orf49	RZPDp9027L232Q	0.253785	8.83153	2.77809	0.0107496	0.668556	-3.0853
3711	RZPDp9027L2415Q	OTUB1	RZPDp9027L2415Q	-0.269401	8.51739	-1.33711	0.194381	0.784382	-4.52393
1246	RZPDp9028I2020Q	ANKRD17	RZPDp9028I2020Q	-0.269136	6.80274	-2.00964	0.0564542	0.678323	-3.9242
1201	RZPDp9028C181Q	PSMC4	RZPDp9028C181Q	-0.269133	7.79332	-2.03299	0.0538628	0.672388	-3.90064
2988	RZPDp9028F0415Q	PPIE	RZPDp9028F0415Q	-0.269073	7.06367	-1.47825	0.153031	0.764092	-4.4125
4610	RZPDp9027P1110Q	JUND	RZPDp9027P1110Q	-0.268798	9.36733	-1.18106	0.249758	0.809527	-4.63666
208	RZPDp9028E145Q	SHC1	RZPDp9028E145Q	0.253511	7.72979	2.80572	0.0100906	0.668556	-3.05337
430	RZPDp9028B115Q	IGLL5	RZPDp9028B115Q	0.252439	7.74146	2.51123	0.0195791	0.668556	-3.38887
630	RZPDp9028C1110Q	PHF3	RZPDp9028C1110Q	0.252308	7.30006	2.32492	0.029348	0.669829	-3.59412
2285	RZPDp9027M1314Q	TBRG4	RZPDp9027M1314Q	-0.267707	8.51773	-1.64405	0.113891	0.746045	-4.27103
1145	RZPDp9027H038Q	PLD3	RZPDp9027H038Q	-0.267572	9.10736	-2.0564	0.0513707	0.669905	-3.87685
1928	RZPDp9028D1014Q	PEF1	RZPDp9028D1014Q	-0.267472	7.43641	-1.75074	0.0934428	0.726653	-4.17447
615	RZPDp9027L149Q	TTC14	RZPDp9027L149Q	0.251457	7.51002	2.34098	0.0283557	0.669829	-3.57669
2195	RZPDp9027M0713Q	TMOD1	RZPDp9027M0713Q	-0.267292	8.85849	-1.66722	0.109156	0.744134	-4.25041
1495	RZPDp9027M2317Q	NUP133	RZPDp9027M2317Q	-0.267195	8.51735	-1.90014	0.0701396	0.702767	-4.03263
704	RZPDp9028N036Q	AFG3L2	RZPDp9028N036Q	0.251413	7.55464	2.28425	0.0320049	0.669829	-3.63802
2169	RZPDp9028H243Q	INO80E	RZPDp9028H243Q	-0.267006	9.71128	-1.67457	0.10769	0.742875	-4.24384
5016	RZPDp9027J0510Q	GPC3	RZPDp9027J0510Q	-0.266935	9.34413	-1.12301	0.273123	0.816002	-4.67562
112	RZPDp9028E069Q	ARHGAP30	RZPDp9028E069Q	0.251075	7.41846	3.05592	0.00564031	0.668556	-2.76117
1694	RZPDp9027I2016Q	BZW2	RZPDp9027I2016Q	-0.266575	8.99245	-1.83321	0.0798677	0.703841	-4.09709
605	RZPDp9027F152Q	SNW1	RZPDp9027F152Q	0.250964	7.78806	2.35402	0.027573	0.669829	-3.5625
693	RZPDp9027B147Q	IRF2BPL	RZPDp9027B147Q	0.250875	8.09707	2.28965	0.0316397	0.669829	-3.63221
2433	RZPDp9027D1110Q	CBS	RZPDp9027D1110Q	-0.266484	9.28875	-1.60521	0.122216	0.752557	-4.30514
1853	RZPDp9027A0917Q	MRPL47	RZPDp9027A0917Q	-0.266406	8.47692	-1.77416	0.0894004	0.72138	-4.15273
3731	RZPDp9027E0110Q	ZNF622	RZPDp9027E0110Q	-0.265811	8.40089	-1.33336	0.195588	0.784382	-4.52677
3011	RZPDp9028O204Q	CERCAM	RZPDp9028O204Q	-0.265392	8.6679	-1.47607	0.15361	0.764092	-4.41428
439	RZPDp9028N188Q	UBE2D2	RZPDp9028N188Q	0.250388	7.45258	2.50209	0.0199776	0.668556	-3.39909
1621	RZPDp9028G2021Q	DDIT4	RZPDp9028G2021Q	-0.265329	8.32486	-1.85533	0.0765309	0.703841	-4.07595
1303	RZPDp9028O0114Q	TWNK	RZPDp9028O0114Q	-0.265123	7.6102	-1.9845	0.0593689	0.681307	-3.94942
609	RZPDp9028D188Q	NAA25	RZPDp9028D188Q	0.250165	7.67623	2.34759	0.0279565	0.669829	-3.5695
1552	RZPDp9027A2217Q	LPL	RZPDp9027A2217Q	-0.265006	8.87149	-1.88138	0.0727563	0.702767	-4.05084
678	RZPDp9028J234Q	NCOA3	RZPDp9028J234Q	0.249744	7.72396	2.29964	0.0309747	0.669829	-3.62145
538	RZPDp9028B028Q	UBE2S	RZPDp9028B028Q	0.249686	7.59914	2.41111	0.0243743	0.669829	-3.49998
114	RZPDp9027J193Q	SNHG29	RZPDp9027J193Q	0.249448	8.73855	3.05316	0.00567714	0.668556	-2.76442
3673	RZPDp9027G0720Q	CHP1	RZPDp9027G0720Q	-0.264344	8.35315	-1.34263	0.192615	0.784382	-4.51974
529	RZPDp9027A123Q	GOSR2	RZPDp9027A123Q	0.247973	8.14113	2.42221	0.0237934	0.669829	-3.48774
857	RZPDp9028E034Q	OAS3	RZPDp9028E034Q	0.247652	8.08198	2.19162	0.038894	0.669829	-3.73663
245	RZPDp9027B055Q	STMN4	RZPDp9027B055Q	0.247288	8.20986	2.74736	0.0115304	0.668556	-3.12072
1413	RZPDp9027O229Q	MYT1	RZPDp9027O229Q	-0.26401	8.66032	-1.92915	0.066257	0.701198	-4.00426
1647	RZPDp9027K1311Q	CCDC167	RZPDp9027K1311Q	-0.263707	9.90076	-1.84649	0.0778486	0.703841	-4.08441
4530	RZPDp9028N199Q	DCTN1	RZPDp9028N199Q	-0.263416	7.97691	-1.19616	0.243931	0.807342	-4.62626
213	RZPDp9028A247Q	LAMA5	RZPDp9028A247Q	0.24721	7.61188	2.79923	0.0102417	0.668556	-3.06087
7049	RZPDp9027I0815Q	DPYSL3	RZPDp9027I0815Q	-0.263195	9.60041	-0.844636	0.407094	0.865742	-4.83843
1403	RZPDp9027I2210Q	PC	RZPDp9027I2210Q	-0.263114	8.96817	-1.93295	0.065762	0.701198	-4.00052
4160	RZPDp9027O0213Q	POR	RZPDp9027O0213Q	-0.263038	9.3766	-1.25977	0.2205	0.794319	-4.58123
3677	RZPDp9027E1719Q	AP1S1	RZPDp9027E1719Q	-0.262881	8.65519	-1.34227	0.192729	0.784382	-4.52001
1178	RZPDp9027L1214Q	AKR7A2	RZPDp9027L1214Q	-0.262853	9.16828	-2.04148	0.0529464	0.670849	-3.89202
926	RZPDp9028A035Q	BAZ1B	RZPDp9028A035Q	0.246987	7.52523	2.15128	0.0422943	0.669829	-3.77895
783	RZPDp9028B139Q	POLRMT	RZPDp9028B139Q	0.246402	7.99043	2.2355	0.0354784	0.669829	-3.69016
823	RZPDp9028E074Q	ARHGEF1	RZPDp9028E074Q	0.246129	7.43841	2.21151	0.0373106	0.669829	-3.71563
141	RZPDp9028F125Q	TELO2	RZPDp9028F125Q	0.245847	7.79485	2.96497	0.0069804	0.668556	-2.86793
2483	RZPDp9028D0915Q	NPIPB13	RZPDp9028D0915Q	-0.262096	7.29238	-1.5939	0.124735	0.752861	-4.31497
960	RZPDp9027F174Q	ZNHIT1	RZPDp9027F174Q	0.245358	8.573	2.13549	0.0436967	0.669829	-3.7954
897	RZPDp9028B104Q	NOTCH2	RZPDp9028B104Q	0.245314	8.40183	2.16506	0.041104	0.669829	-3.76454
1107	RZPDp9027L0217Q	FKBPL	RZPDp9027L0217Q	0.245313	8.97762	2.07238	0.0497295	0.669829	-3.86052
2822	RZPDp9027O1411Q	EEF1A1	RZPDp9027O1411Q	-0.261692	10.9386	-1.51309	0.144003	0.762868	-4.38369
2882	RZPDp9027D1011Q	EPB42	RZPDp9027D1011Q	-0.261532	9.61828	-1.50221	0.146775	0.762868	-4.39274
2251	RZPDp9027G0413Q	FAU	RZPDp9027G0413Q	-0.260887	9.42865	-1.65251	0.112143	0.746045	-4.26353
854	RZPDp9028B022Q	IGKC	RZPDp9028B022Q	0.244685	7.36309	2.19275	0.0388027	0.669829	-3.73544
3047	RZPDp9027I2317Q	WWC1	RZPDp9027I2317Q	-0.260833	8.59033	-1.46743	0.155926	0.767246	-4.42134
1492	RZPDp9027F164Q	EFHC1	RZPDp9027F164Q	-0.26062	7.95631	-1.90178	0.0699159	0.70258	-4.03104
795	RZPDp9028P1313Q	MED4	RZPDp9028P1313Q	0.244239	6.97646	2.22821	0.0360261	0.669829	-3.69791
264	RZPDp9027M071Q	AMPD2	RZPDp9027M071Q	0.244134	8.26927	2.71349	0.0124532	0.668556	-3.15964
2915	RZPDp9027M2217Q	PEBP1	RZPDp9027M2217Q	-0.260173	8.74002	-1.49569	0.148455	0.763427	-4.39814
3390	RZPDp9027O2011Q	ITIH2	RZPDp9027O2011Q	-0.260108	10.7846	-1.39114	0.177615	0.783523	-4.48229
514	RZPDp9028G196Q	NDFIP2	RZPDp9028G196Q	0.244119	8.20038	2.43177	0.0233034	0.669829	-3.47719
2330	RZPDp9027O0416Q	ZSWIM6	RZPDp9027O0416Q	-0.259957	10.4584	-1.63319	0.11617	0.746045	-4.28063
737	RZPDp9027F176Q	RUSC1	RZPDp9027F176Q	0.24393	9.45867	2.26232	0.0335267	0.669829	-3.66154
70	RZPDp9027B0617Q	ARF4	RZPDp9027B0617Q	0.243514	7.48502	3.24038	0.00364126	0.668556	-2.54341
405	RZPDp9028F085Q	PRRC2C	RZPDp9028F085Q	0.243379	7.71261	2.54167	0.0183053	0.668556	-3.35476
1793	RZPDp9028H2210Q	ZDHHC3	RZPDp9028H2210Q	-0.259372	7.25771	-1.79552	0.0858442	0.717103	-4.13274
1624	RZPDp9027K1015Q	MAN2A2	RZPDp9027K1015Q	-0.259214	8.10901	-1.85221	0.0769939	0.703841	-4.07894
1445	RZPDp9027C0916Q	TARS1	RZPDp9027C0916Q	-0.259136	9.43222	-1.91662	0.0679109	0.701198	-4.01655
3095	RZPDp9027N0211Q	AATK	RZPDp9027N0211Q	-0.259103	10.1052	-1.45321	0.159798	0.774103	-4.43289
464	RZPDp9028F058Q	NUP62	RZPDp9028F058Q	0.243367	7.61643	2.48262	0.0208513	0.668556	-3.4208
1397	RZPDp9028C2120Q	SH3BP5	RZPDp9028C2120Q	-0.258208	8.27801	-1.93673	0.0652729	0.700528	-3.99679
971	RZPDp9028B0418Q	KLF3	RZPDp9028B0418Q	0.242901	6.95009	2.12756	0.0444169	0.669829	-3.80364
4380	RZPDp9027M0614Q	CCDC74A	RZPDp9027M0614Q	-0.258179	8.98647	-1.22097	0.23458	0.802193	-4.60893
1364	RZPDp9027L1013Q	MAU2	RZPDp9027L1013Q	-0.258095	8.60778	-1.95292	0.0632163	0.693924	-3.98081
3113	RZPDp9027O1313Q	CCT2	RZPDp9027O1313Q	-0.25794	8.74808	-1.44864	0.16106	0.775194	-4.43659
639	RZPDp9028D167Q	NUP210	RZPDp9028D167Q	0.242412	7.27052	2.31957	0.0296855	0.669829	-3.59991
1987	RZPDp9027C0313Q	MCM2	RZPDp9027C0313Q	-0.257812	9.58475	-1.7335	0.0965187	0.728206	-4.19035
3665	RZPDp9027F172Q	C1QTNF4	RZPDp9027F172Q	-0.25772	8.8336	-1.34394	0.192195	0.784382	-4.51874
644	RZPDp9028I165Q	CALCOCO2	RZPDp9028I165Q	0.242058	7.51814	2.31676	0.0298644	0.669829	-3.60296
2366	RZPDp9027E0913Q	MTRF1L	RZPDp9027E0913Q	-0.257665	8.93912	-1.62354	0.118228	0.747006	-4.28912
1462	RZPDp9027A2111Q	ZNF335	RZPDp9027A2111Q	-0.257613	8.90929	-1.912	0.0685284	0.701198	-4.02106
1545	RZPDp9027P1814Q	RACK1	RZPDp9027P1814Q	-0.25743	9.10943	-1.88278	0.0725583	0.702767	-4.04949
2849	RZPDp9027L1716Q	AP3S2	RZPDp9027L1716Q	-0.257195	9.73588	-1.50769	0.145373	0.762868	-4.38818
3834	RZPDp9027F2316Q	DCTN1	RZPDp9027F2316Q	-0.257142	8.56062	-1.31747	0.200775	0.784545	-4.53874
1143	RZPDp9027H1914Q	PPP1CA	RZPDp9027H1914Q	-0.257085	8.29754	-2.05714	0.0512936	0.669905	-3.87609
2436	RZPDp9027O1513Q	EXOSC8	RZPDp9027O1513Q	-0.256967	9.57292	-1.60465	0.12234	0.752557	-4.30562
1170	RZPDp9028P1117Q	PREX1	RZPDp9028P1117Q	-0.25655	6.89341	-2.04656	0.0524052	0.669905	-3.88686
1533	RZPDp9028G193Q	ANXA11	RZPDp9028G193Q	-0.256051	9.37637	-1.88513	0.0722265	0.702767	-4.04721
1221	RZPDp9028P245Q	APOL1	RZPDp9028P245Q	-0.255692	8.2199	-2.02118	0.0551599	0.677323	-3.91257
1703	RZPDp9028P121Q	CREBBP	RZPDp9028P121Q	-0.255472	8.24985	-1.83181	0.0800821	0.703841	-4.09841
1923	RZPDp9028K165Q	PPP1R9B	RZPDp9028K165Q	-0.255278	7.81999	-1.7541	0.0928527	0.723942	-4.17136
267	RZPDp9027P194Q	ZNRF1	RZPDp9027P194Q	0.241953	8.98472	2.70966	0.0125618	0.668556	-3.16404
1935	RZPDp9027H0911Q	PARP6	RZPDp9027H0911Q	-0.255042	8.27272	-1.7473	0.0940494	0.726798	-4.17765
2523	RZPDp9028B0710Q	RPS7	RZPDp9028B0710Q	-0.254778	10.3577	-1.5849	0.126769	0.753307	-4.32275
3242	RZPDp9027P072Q	KIF1A	RZPDp9027P072Q	-0.254701	9.70108	-1.42095	0.168869	0.780743	-4.45877
3010	RZPDp9027F128Q	GGA1	RZPDp9027F128Q	-0.254614	11.1941	-1.47608	0.153607	0.764092	-4.41427
975	RZPDp9028A2211Q	PPP1R21	RZPDp9028A2211Q	0.241942	7.24095	2.12506	0.0446465	0.669829	-3.80624
2240	RZPDp9027O0113Q	PTPN12	RZPDp9027O0113Q	-0.254564	8.43533	-1.65439	0.111758	0.746045	-4.26186
5192	RZPDp9027M0513Q	ZBTB18	RZPDp9027M0513Q	-0.254531	9.45113	-1.09709	0.284062	0.819564	-4.69249
4203	RZPDp9027A1313Q	CENPT	RZPDp9027A1313Q	-0.254528	8.43161	-1.25302	0.222904	0.795026	-4.5861
236	RZPDp9027N041Q	THAP3	RZPDp9027N041Q	0.241778	8.61415	2.76595	0.0110519	0.668556	-3.09931
1706	RZPDp9027H2310Q	DYNC2I2	RZPDp9027H2310Q	-0.254087	9.15064	-1.8316	0.0801147	0.703841	-4.09861
5084	RZPDp9027D098Q	DNAJC7	RZPDp9027D098Q	-0.253993	10.0958	-1.1126	0.27748	0.818032	-4.68244
844	RZPDp9028M1214Q	HLA-A	RZPDp9028M1214Q	0.241756	7.02557	2.19904	0.0382959	0.669829	-3.7288
550	RZPDp9027F023Q	LMTK2	RZPDp9027F023Q	0.241608	8.71357	2.40044	0.0249448	0.669829	-3.51171
1141	RZPDp9027C1010Q	NBPF14	RZPDp9027C1010Q	-0.253761	9.61993	-2.05799	0.051205	0.669905	-3.87522
723	RZPDp9027G141Q	CUX1	RZPDp9027G141Q	0.24124	7.75446	2.26993	0.0329911	0.669829	-3.65338
2047	RZPDp9027E0613Q	NOL11	RZPDp9027E0613Q	-0.253379	9.11958	-1.71311	0.100267	0.733779	-4.209
1510	RZPDp9028D203Q	SYNE2	RZPDp9028D203Q	-0.253298	7.77831	-1.893	0.0711265	0.702767	-4.03958
1259	RZPDp9028C2011Q	RPL13A	RZPDp9028C2011Q	-0.253143	8.37725	-2.00339	0.0571669	0.679423	-3.93049
1328	RZPDp9027M1313Q	FMNL1	RZPDp9027M1313Q	-0.25314	8.71573	-1.97511	0.0604902	0.681699	-3.95878
5405	RZPDp9027C029Q	YWHAB	RZPDp9027C029Q	-0.253049	9.80878	-1.06804	0.296687	0.822213	-4.71098
677	RZPDp9027L029Q	CRMP1	RZPDp9027L029Q	0.241232	7.62911	2.30014	0.0309413	0.669829	-3.6209
1915	RZPDp9027H0614Q	HK1	RZPDp9027H0614Q	-0.252838	8.82727	-1.75819	0.0921392	0.72138	-4.16757
1408	RZPDp9027F1313Q	RNF31	RZPDp9027F1313Q	-0.252464	8.04236	-1.93056	0.0660727	0.701198	-4.00287
5910	RZPDp9027B1715Q	ZNF827	RZPDp9027B1715Q	-0.252463	9.84925	-0.996099	0.329661	0.835685	-4.7549
571	RZPDp9028F246Q	HSPA5	RZPDp9028F246Q	0.240638	7.6219	2.37827	0.0261698	0.669829	-3.53602
1773	RZPDp9027C0410Q	ZNF618	RZPDp9027C0410Q	-0.252444	9.05654	-1.80182	0.0848186	0.716538	-4.12681
384	RZPDp9028B1212Q	PSMA4	RZPDp9028B1212Q	0.240366	7.24331	2.56507	0.0173793	0.668556	-3.32844
882	RZPDp9028G047Q	IDH3B	RZPDp9028G047Q	0.240361	7.30326	2.17624	0.0401604	0.669829	-3.75281
1941	RZPDp9027F1816Q	COQ4	RZPDp9027F1816Q	-0.252359	10.0995	-1.74685	0.0941284	0.726798	-4.17806
803	RZPDp9027F011Q	HLA-E	RZPDp9027F011Q	0.24012	9.83694	2.22241	0.0364675	0.669829	-3.70407
508	RZPDp9028I205Q	DUSP7	RZPDp9028I205Q	0.240113	7.56064	2.4365	0.0230648	0.669829	-3.47197
1016	RZPDp9028H078Q	APMAP	RZPDp9028H078Q	0.23975	7.63347	2.10502	0.0465226	0.669829	-3.82698
3365	RZPDp9027H181Q	DCTN1	RZPDp9027H181Q	-0.252163	8.32233	-1.39568	0.176263	0.783523	-4.47874
3240	RZPDp9027D2013Q	ACTA2	RZPDp9027D2013Q	-0.251472	9.4942	-1.42147	0.168721	0.780632	-4.45836
1634	RZPDp9027I0514Q	FBLN2	RZPDp9027I0514Q	-0.251064	9.20609	-1.84989	0.0773402	0.703841	-4.08116
2260	RZPDp9027L1113Q	DYNLT1	RZPDp9027L1113Q	-0.251035	9.12896	-1.64964	0.112734	0.746045	-4.26608
2688	RZPDp9027G0414Q	STMN2	RZPDp9027G0414Q	-0.25102	9.47304	-1.54684	0.135677	0.756774	-4.3553
1804	RZPDp9028P2120Q	CSNK1D	RZPDp9028P2120Q	-0.250681	6.89285	-1.79284	0.0862839	0.717103	-4.13525
1044	RZPDp9028P059Q	PRKCD	RZPDp9028P059Q	0.239644	8.31084	2.0933	0.0476517	0.669829	-3.83905
2055	RZPDp9027J118Q	CAD	RZPDp9027J118Q	-0.250418	9.51634	-1.71146	0.100575	0.733779	-4.2105
1098	RZPDp9027I204Q	SAMD1	RZPDp9027I204Q	0.239453	9.39321	2.07584	0.0493805	0.669829	-3.85698
1006	RZPDp9027B085Q	MPP1	RZPDp9027B085Q	0.238887	9.39754	2.10931	0.0461146	0.669829	-3.82254
1555	RZPDp9027A239Q	PIGT	RZPDp9027A239Q	-0.250012	9.01987	-1.88001	0.0729502	0.703372	-4.05216
1808	RZPDp9027I0614Q	IMPDH2	RZPDp9027I0614Q	-0.249903	9.5921	-1.79026	0.0867074	0.719029	-4.13767
5030	RZPDp9027M2313Q	KIAA0753	RZPDp9027M2313Q	-0.249894	9.12006	-1.12148	0.27376	0.816002	-4.67663
2305	RZPDp9027D0513Q	THOP1	RZPDp9027D0513Q	-0.249552	8.56494	-1.63874	0.115001	0.746045	-4.27573
961	RZPDp9027B062Q	AAAS	RZPDp9027B062Q	0.238668	9.06516	2.13512	0.0437301	0.669829	-3.79578
158	RZPDp9028J244Q	KDM4A	RZPDp9028J244Q	0.23847	8.34598	2.93315	0.00751746	0.668556	-2.90514
946	RZPDp9028J166Q	LOC102724852	RZPDp9028J166Q	0.238316	7.64963	2.14245	0.0430736	0.669829	-3.78816
2164	RZPDp9028O135Q	FBXO6	RZPDp9028O135Q	-0.249267	8.13826	-1.6763	0.107346	0.742875	-4.24228
715	RZPDp9027F077Q	RNASE4	RZPDp9027F077Q	0.238272	8.30897	2.27684	0.0325118	0.669829	-3.64597
1047	RZPDp9028N055Q	CEP44	RZPDp9028N055Q	0.238195	7.62214	2.09258	0.0477224	0.669829	-3.8398
791	RZPDp9027G241Q	PTPRA	RZPDp9027G241Q	0.238189	7.93878	2.22956	0.0359242	0.669829	-3.69648
2833	RZPDp9027A1013Q	ARFGAP2	RZPDp9027A1013Q	-0.248826	9.85357	-1.51044	0.144674	0.762868	-4.3859
433	RZPDp9028M0417Q	DDX56	RZPDp9028M0417Q	0.23791	7.15038	2.50872	0.0196881	0.668556	-3.39168
2635	RZPDp9028C0421Q	RPS6	RZPDp9028C0421Q	-0.248493	8.11848	-1.55761	0.133106	0.75511	-4.34615
1962	RZPDp9027G1713Q	COX7B	RZPDp9027G1713Q	-0.248442	9.8903	-1.74005	0.09534	0.727283	-4.18433
967	RZPDp9027F194Q	R3HCC1	RZPDp9027F194Q	0.237806	9.51234	2.13227	0.0439884	0.669829	-3.79875
2053	RZPDp9027E0713Q	TIAL1	RZPDp9027E0713Q	-0.248221	9.36962	-1.7118	0.100512	0.733779	-4.21019
1874	RZPDp9027F2310Q	RUSC2	RZPDp9027F2310Q	-0.248209	9.43315	-1.76767	0.090505	0.72138	-4.15877
4131	RZPDp9027C2211Q	GMDS	RZPDp9027C2211Q	-0.248139	9.61578	-1.2645	0.218831	0.793953	-4.5778
1920	RZPDp9027P1113Q	CRMP1	RZPDp9027P1113Q	-0.248087	8.51229	-1.7561	0.0925034	0.722346	-4.16951
3534	RZPDp9027B029Q	UFC1	RZPDp9027B029Q	-0.247983	8.29367	-1.36687	0.185	0.784343	-4.50116
2945	RZPDp9027P176Q	ING3	RZPDp9027P176Q	-0.24797	9.90002	-1.48883	0.150241	0.764092	-4.4038
3762	RZPDp9027E0313Q	GNB2	RZPDp9027E0313Q	-0.247931	8.74501	-1.32895	0.197016	0.784382	-4.5301
812	RZPDp9027I1111Q	ZNF30	RZPDp9027I1111Q	0.237725	8.46865	2.21683	0.0368965	0.669829	-3.70998
3272	RZPDp9027B2316Q	RPL18	RZPDp9027B2316Q	-0.247807	9.78505	-1.41371	0.170963	0.783264	-4.46452
675	RZPDp9027O104Q	ANK1	RZPDp9027O104Q	0.237422	9.43333	2.30206	0.0308151	0.669829	-3.61883
2524	RZPDp9028C0613Q	IDH3B	RZPDp9028C0613Q	-0.247729	7.72194	-1.58462	0.126833	0.753307	-4.32299
270	RZPDp9028N115Q	IGFBP5	RZPDp9028N115Q	0.237243	7.78576	2.70709	0.012635	0.668556	-3.16698
413	RZPDp9028E247Q	HLA-C	RZPDp9028E247Q	0.237196	7.41659	2.53435	0.0186047	0.668556	-3.36298
1927	RZPDp9028M089Q	NCOA3	RZPDp9028M089Q	-0.247364	7.2974	-1.75148	0.0933126	0.726018	-4.17378
1423	RZPDp9028I2012Q	MYO5A	RZPDp9028I2012Q	-0.247205	8.66569	-1.92434	0.0668873	0.701198	-4.00898
1394	RZPDp9028N173Q	AKT1	RZPDp9028N173Q	-0.247155	7.89967	-1.93735	0.0651942	0.700528	-3.99619
3136	RZPDp9027E0617Q	TOX2	RZPDp9027E0617Q	-0.247143	8.78951	-1.44422	0.162285	0.775194	-4.44014
318	RZPDp9028M1016Q	CDR2	RZPDp9028M1016Q	0.236909	7.24882	2.63687	0.0148036	0.668556	-3.24715
1245	RZPDp9027L0510Q	KAT2A	RZPDp9027L0510Q	-0.246605	9.79205	-2.00983	0.0564325	0.678323	-3.92401
3881	RZPDp9028G1812Q	HCFC1	RZPDp9028G1812Q	-0.246595	7.91466	-1.30896	0.203595	0.784642	-4.5451
837	RZPDp9028M146Q	LARS1	RZPDp9028M146Q	0.236722	8.01311	2.20089	0.0381486	0.669829	-3.72685
480	RZPDp9027E191Q	BTBD10	RZPDp9027E191Q	0.235742	8.24973	2.46813	0.0215244	0.668556	-3.43691
2738	RZPDp9027P0715Q	DDR1	RZPDp9027P0715Q	-0.245862	9.80475	-1.53315	0.139005	0.760992	-4.36687
5271	RZPDp9027E1313Q	HBG2	RZPDp9027E1313Q	-0.245634	9.68761	-1.08711	0.288351	0.819707	-4.69888
2402	RZPDp9027A1311Q	TNC	RZPDp9027A1311Q	-0.245513	8.96882	-1.61647	0.119753	0.747485	-4.29531
4643	RZPDp9027K0419Q	CLIC1	RZPDp9027K0419Q	-0.24549	8.47338	-1.17587	0.251783	0.809527	-4.64021
2287	RZPDp9028H171Q	CDH1	RZPDp9028H171Q	-0.245298	7.10732	-1.64391	0.113921	0.746045	-4.27116
2204	RZPDp9027D1515Q	RNF25	RZPDp9027D1515Q	-0.245215	9.57992	-1.66555	0.109493	0.744134	-4.25191
1521	RZPDp9028P182Q	SRSF6	RZPDp9028P182Q	-0.245075	7.84079	-1.88984	0.0715664	0.702767	-4.04264
2691	RZPDp9028J1020Q	YTHDC2	RZPDp9028J1020Q	-0.244654	7.22236	-1.54571	0.13595	0.757364	-4.35626
1050	RZPDp9027F097Q	MRPS6	RZPDp9027F097Q	0.235082	8.85598	2.09179	0.0477996	0.669829	-3.84061
2274	RZPDp9027E1916Q	ZNF513	RZPDp9027E1916Q	-0.24437	8.54064	-1.64665	0.113351	0.746045	-4.26873
2118	RZPDp9027D0310Q	MIB2	RZPDp9027D0310Q	-0.244317	8.50938	-1.69254	0.104172	0.736793	-4.22766
2284	RZPDp9027H1314Q	PKM	RZPDp9027H1314Q	-0.244294	9.00269	-1.64456	0.113786	0.746045	-4.27058
1208	RZPDp9027O028Q	RPL29	RZPDp9027O028Q	-0.244169	9.32182	-2.02807	0.0543993	0.675134	-3.90561
272	RZPDp9027J1719Q	ANKIB1	RZPDp9027J1719Q	0.234535	8.58898	2.7052	0.0126893	0.668556	-3.16914
1024	RZPDp9028M1210Q	MYL6	RZPDp9028M1210Q	0.234451	7.55521	2.1011	0.0468979	0.669829	-3.83102
1463	RZPDp9027L192Q	RASSF1	RZPDp9027L192Q	-0.243837	9.18483	-1.91189	0.0685437	0.701198	-4.02117
3424	RZPDp9028D1214Q	RAB40C	RZPDp9028D1214Q	-0.243731	8.35777	-1.38611	0.179126	0.783523	-4.48622
883	RZPDp9028D0411Q	WDR74	RZPDp9028D0411Q	0.233968	8.31815	2.17577	0.0401995	0.669829	-3.75331
1025	RZPDp9027I199Q	ATRX	RZPDp9027I199Q	0.233916	7.65781	2.1008	0.0469266	0.669829	-3.83133
2412	RZPDp9027C118Q	SH3GL1	RZPDp9027C118Q	-0.243159	9.33647	-1.61212	0.120699	0.749902	-4.29911
1450	RZPDp9028H053Q	CLSTN1	RZPDp9028H053Q	-0.242955	7.21537	-1.91454	0.0681878	0.701198	-4.01858
3260	RZPDp9028J1117Q	KRT73	RZPDp9028J1117Q	-0.242693	7.2773	-1.41543	0.170462	0.783153	-4.46316
1472	RZPDp9027A2310Q	FAM102A	RZPDp9027A2310Q	-0.242665	8.91307	-1.90832	0.0690254	0.701229	-4.02466
2233	RZPDp9027A187Q	OCIAD2	RZPDp9027A187Q	-0.242129	8.11334	-1.65653	0.111319	0.746045	-4.25995
453	RZPDp9028H1319Q	PPT1	RZPDp9028H1319Q	0.233291	6.97579	2.49145	0.020451	0.668556	-3.41097
3423	RZPDp9027F0317Q	SPATS2	RZPDp9027F0317Q	-0.24209	8.45005	-1.38618	0.179105	0.783523	-4.48617
3216	RZPDp9027H2311Q	NKIRAS2	RZPDp9027H2311Q	-0.241971	10.0752	-1.42871	0.166651	0.776928	-4.45259
1677	RZPDp9027M196Q	MAGED2	RZPDp9027M196Q	-0.241966	9.4064	-1.83867	0.0790323	0.703841	-4.09188
824	RZPDp9028F016Q	DNAJB12	RZPDp9028F016Q	0.232532	7.35473	2.21124	0.0373317	0.669829	-3.71591
4004	RZPDp9027K0113Q	MAP2K7	RZPDp9027K0113Q	-0.241617	9.34651	-1.28966	0.210105	0.786738	-4.55941
268	RZPDp9028G2410Q	CCDC88C	RZPDp9028G2410Q	0.232291	7.80546	2.70959	0.0125637	0.668556	-3.16411
1437	RZPDp9028E0220Q	SAPCD2	RZPDp9028E0220Q	-0.241395	8.4776	-1.91961	0.0675119	0.701198	-4.01361
2316	RZPDp9027K1418Q	ZC3HC1	RZPDp9027K1418Q	-0.241053	9.04815	-1.63617	0.115541	0.746045	-4.278
987	RZPDp9028A1915Q	NOB1	RZPDp9028A1915Q	0.232117	7.1717	2.1185	0.045253	0.669829	-3.81304
1265	RZPDp9027P2214Q	SOD1	RZPDp9027P2214Q	-0.240964	9.00823	-2.00137	0.0573991	0.679423	-3.93252
841	RZPDp9027F132Q	TSEN2	RZPDp9027F132Q	0.231953	9.48111	2.20027	0.0381976	0.669829	-3.7275
542	RZPDp9027M031Q	CTTN	RZPDp9027M031Q	0.231843	8.21235	2.4083	0.0245231	0.669829	-3.50306
3174	RZPDp9028L0918Q	HNRNPA1	RZPDp9028L0918Q	-0.24071	7.32097	-1.43661	0.164415	0.775771	-4.44626
2561	RZPDp9028J037Q	MSN	RZPDp9028J037Q	-0.240675	7.58257	-1.57435	0.129188	0.754853	-4.33183
1599	RZPDp9027M0514Q	EDEM2	RZPDp9027M0514Q	-0.240672	9.00495	-1.86111	0.0756782	0.703841	-4.07039
305	RZPDp9028L0320Q	SCYL1	RZPDp9028L0320Q	0.231371	6.75027	2.656	0.0141804	0.668556	-3.22537
1001	RZPDp9027H211Q	NSFL1C	RZPDp9027H211Q	0.23126	8.45456	2.11123	0.0459332	0.669829	-3.82056
1212	RZPDp9028C1514Q	UBR1	RZPDp9028C1514Q	-0.240423	7.78898	-2.02599	0.0546286	0.67569	-3.90772
2931	RZPDp9027M198Q	CLCN2	RZPDp9027M198Q	-0.240395	9.02659	-1.4926	0.149257	0.763499	-4.40069
1062	RZPDp9027E101Q	ZNF33B	RZPDp9027E101Q	0.230598	8.82547	2.08837	0.0481344	0.669829	-3.84412
1161	RZPDp9027H136Q	DLST	RZPDp9027H136Q	-0.240224	7.94521	-2.05012	0.0520293	0.669905	-3.88325
3505	RZPDp9027I0811Q	PLEKHO1	RZPDp9027I0811Q	-0.240028	9.4229	-1.37212	0.183383	0.783523	-4.4971
935	RZPDp9027G024Q	PDIA4	RZPDp9027G024Q	0.229991	8.40356	2.14621	0.0427401	0.669829	-3.78423
2186	RZPDp9028D2215Q	RPL7	RZPDp9028D2215Q	-0.239886	8.49691	-1.67064	0.108472	0.743695	-4.24736
847	RZPDp9027M1019Q	COPS6	RZPDp9027M1019Q	0.22975	7.5037	2.19705	0.0384556	0.669829	-3.7309
3609	RZPDp9027I138Q	RSL1D1	RZPDp9027I138Q	-0.239726	8.40783	-1.35278	0.189397	0.784382	-4.51199
1785	RZPDp9027O2117Q	ARPC4	RZPDp9027O2117Q	-0.239695	8.28014	-1.79862	0.0853383	0.716538	-4.12982
447	RZPDp9028K137Q	MAML2	RZPDp9028K137Q	0.229645	7.29302	2.49368	0.0203507	0.668556	-3.40847
4387	RZPDp9027N016Q	FZR1	RZPDp9027N016Q	-0.239597	9.81018	-1.2204	0.234792	0.802193	-4.60933
632	RZPDp9028A086Q	HYOU1	RZPDp9028A086Q	0.229448	8.05897	2.32426	0.0293897	0.669829	-3.59484
2633	RZPDp9027P2310Q	RARS1	RZPDp9027P2310Q	-0.239524	9.10057	-1.55797	0.133021	0.75511	-4.34584
2038	RZPDp9027L218Q	RRP15	RZPDp9027L218Q	-0.239519	9.4742	-1.71607	0.0997149	0.733155	-4.2063
828	RZPDp9027F021Q	EHMT2	RZPDp9027F021Q	0.228958	8.56439	2.20948	0.037469	0.669829	-3.71777
3686	RZPDp9027N1514Q	GPT2	RZPDp9027N1514Q	-0.239348	9.04761	-1.34085	0.193183	0.784382	-4.52109
1057	RZPDp9028F136Q	PTBP1	RZPDp9028F136Q	0.227526	7.64334	2.08948	0.0480254	0.669829	-3.84298
2710	RZPDp9027L2318Q	LRP5	RZPDp9027L2318Q	-0.239106	8.98476	-1.54097	0.137096	0.757747	-4.36027
2281	RZPDp9027P1611Q	PUM1	RZPDp9027P1611Q	-0.239065	10.3507	-1.6451	0.113674	0.746045	-4.2701
1166	RZPDp9027K029Q	NSD3	RZPDp9027K029Q	-0.238981	10.1151	-2.04751	0.0523047	0.669905	-3.8859
1070	RZPDp9028D026Q	RPS27A	RZPDp9028D026Q	0.227236	7.39605	2.0852	0.048447	0.669829	-3.84738
3264	RZPDp9028P047Q	HMGN1	RZPDp9028P047Q	-0.238615	7.40847	-1.41514	0.170549	0.783153	-4.46339
626	RZPDp9027L171Q	ASPSCR1	RZPDp9027L171Q	0.226957	8.46786	2.32752	0.0291854	0.669829	-3.5913
3319	RZPDp9027M1113Q	NSMF	RZPDp9027M1113Q	-0.238332	9.15393	-1.40428	0.173718	0.783523	-4.47198
691	RZPDp9028M1715Q	STAT5A	RZPDp9028M1715Q	0.226389	6.9347	2.29093	0.0315535	0.669829	-3.63083
2380	RZPDp9027B1518Q	ULK1	RZPDp9027B1518Q	-0.238065	9.11133	-1.62088	0.118799	0.747006	-4.29145
4854	RZPDp9027E0112Q	PLK3	RZPDp9027E0112Q	-0.237786	9.12613	-1.14958	0.262238	0.809997	-4.658
1784	RZPDp9027P0218Q	ZNF229	RZPDp9027P0218Q	-0.237732	9.21535	-1.79904	0.08527	0.716538	-4.12943
338	RZPDp9028M227Q	CIB1	RZPDp9028M227Q	0.226157	7.32138	2.61041	0.015708	0.668556	-3.27719
4448	RZPDp9028C193Q	HIRIP3	RZPDp9028C193Q	-0.237607	9.41022	-1.21049	0.238498	0.803701	-4.61629
3794	RZPDp9027C0111Q	TCEA2	RZPDp9027C0111Q	-0.237586	10.0862	-1.32382	0.198689	0.784382	-4.53397
386	RZPDp9028B245Q	FAM83H	RZPDp9028B245Q	0.225791	7.8954	2.56244	0.0174811	0.668556	-3.3314
2239	RZPDp9028K1420Q	KCNAB2	RZPDp9028K1420Q	-0.237125	8.73646	-1.65453	0.111729	0.746045	-4.26173
5357	RZPDp9027L0513Q	PGK1	RZPDp9027L0513Q	-0.237122	6.91407	-1.07538	0.293457	0.821119	-4.70634
5369	RZPDp9027I1217Q	CNN3	RZPDp9027I1217Q	-0.237088	8.58629	-1.07367	0.294208	0.821581	-4.70742
1603	RZPDp9028G101Q	NOSIP	RZPDp9028G101Q	-0.237085	8.01994	-1.86022	0.0758086	0.703841	-4.07124
2564	RZPDp9027L1019Q	ZNF7	RZPDp9027L1019Q	-0.237013	9.08514	-1.57418	0.129226	0.754853	-4.33197
1097	RZPDp9028G1614Q	GLOD4	RZPDp9028G1614Q	0.225245	7.34633	2.07622	0.0493427	0.669829	-3.8566
2582	RZPDp9028N0920Q	RPL7	RZPDp9028N0920Q	-0.236883	9.77537	-1.56917	0.13039	0.75511	-4.33627
891	RZPDp9027G0920Q	ZNF658	RZPDp9027G0920Q	0.223901	7.80934	2.16844	0.0408168	0.669829	-3.761
2237	RZPDp9028A1115Q	ARPP19	RZPDp9028A1115Q	-0.236676	6.79227	-1.65507	0.111618	0.746045	-4.26125
1321	RZPDp9027P229Q	CDH2	RZPDp9027P229Q	-0.236612	9.10785	-1.97863	0.0600671	0.681699	-3.95527
1739	RZPDp9028G0811Q	PRDX1	RZPDp9028G0811Q	-0.236598	7.20902	-1.81622	0.0825159	0.710797	-4.11322
1589	RZPDp9027L096Q	MRTO4	RZPDp9027L096Q	-0.236437	9.22444	-1.86406	0.0752474	0.703841	-4.06756
402	RZPDp9028P1319Q	RAN	RZPDp9028P1319Q	0.223897	6.90616	2.54518	0.0181636	0.668556	-3.35082
911	RZPDp9028G1716Q	ADPGK-AS1	RZPDp9028G1716Q	0.223456	7.01811	2.15867	0.0416521	0.669829	-3.77122
3865	RZPDp9027I059Q	EXT2	RZPDp9027I059Q	-0.236216	8.57196	-1.31202	0.202575	0.784642	-4.54282
1142	RZPDp9027E188Q	SPATA5L1	RZPDp9027E188Q	-0.236142	8.16218	-2.05796	0.051209	0.669905	-3.87526
1071	RZPDp9028H1518Q	YWHAB	RZPDp9028H1518Q	0.222971	6.91912	2.08504	0.0484629	0.669829	-3.84755
1972	RZPDp9027O1013Q	CHCHD7	RZPDp9027O1013Q	-0.235657	9.84217	-1.73679	0.0959251	0.728206	-4.18733
1716	RZPDp9027M1013Q	WDR73	RZPDp9027M1013Q	-0.235499	8.81811	-1.82664	0.0808819	0.70668	-4.10333
2489	RZPDp9027A2311Q	METTL3	RZPDp9027A2311Q	-0.235385	9.82149	-1.5927	0.125004	0.752861	-4.316
276	RZPDp9027J145Q	PKD2L1	RZPDp9027J145Q	0.222531	9.46917	2.70168	0.0127909	0.668556	-3.17318
1959	RZPDp9027I2014Q	PYGB	RZPDp9027I2014Q	-0.235275	9.8327	-1.74093	0.0951823	0.727283	-4.18352
1377	RZPDp9027I0713Q	SEPTIN5	RZPDp9027I0713Q	-0.235251	8.26075	-1.94815	0.0638163	0.694228	-3.98553
2271	RZPDp9027P249Q	UBE2J2	RZPDp9027P249Q	-0.235133	9.12934	-1.64716	0.113247	0.746045	-4.26828
3589	RZPDp9027E2014Q	ATP5F1C	RZPDp9027E2014Q	-0.235049	8.50359	-1.35612	0.188347	0.784382	-4.50943
818	RZPDp9027A104Q	LPAR2	RZPDp9027A104Q	0.22242	9.89396	2.21305	0.0371899	0.669829	-3.71399
1522	RZPDp9027H1013Q	RHOBTB2	RZPDp9027H1013Q	-0.234743	9.42477	-1.88961	0.071598	0.702767	-4.04286
1506	RZPDp9027P2114Q	SND1	RZPDp9027P2114Q	-0.234706	9.17907	-1.89392	0.0709984	0.702767	-4.03868
3669	RZPDp9027P1811Q	EIF4G1	RZPDp9027P1811Q	-0.234602	9.76382	-1.34319	0.192436	0.784382	-4.51931
2408	RZPDp9028B213Q	TUBB	RZPDp9028B213Q	-0.234472	7.32684	-1.61387	0.120318	0.749137	-4.29758
3757	RZPDp9027G0214Q	ADAM15	RZPDp9027G0214Q	-0.234361	9.74554	-1.3296	0.196807	0.784382	-4.52961
561	RZPDp9027F093Q	RECQL4	RZPDp9027F093Q	0.222239	8.98963	2.38871	0.0255858	0.669829	-3.52458
840	RZPDp9028N209Q	TRIM41	RZPDp9028N209Q	0.221859	7.65852	2.2003	0.0381956	0.669829	-3.72748
2462	RZPDp9027D095Q	NUP88	RZPDp9027D095Q	-0.2337	7.90535	-1.59881	0.123637	0.752632	-4.31071
1772	RZPDp9027O1718Q	CINP	RZPDp9027O1718Q	-0.233661	7.5863	-1.8022	0.084758	0.716538	-4.12645
1305	RZPDp9028L109Q	CBR1	RZPDp9028L109Q	-0.233591	7.51987	-1.983	0.0595467	0.681307	-3.95091
5407	RZPDp9027M2111Q	ZNF135	RZPDp9027M2111Q	-0.233503	9.39426	-1.06793	0.296734	0.822213	-4.71104
3619	RZPDp9027O1914Q	ZFP28	RZPDp9027O1914Q	-0.233488	10.3395	-1.35161	0.189766	0.784382	-4.51289
3844	RZPDp9028K0910Q	EIF2AK2	RZPDp9028K0910Q	-0.233288	7.8492	-1.31559	0.201394	0.784642	-4.54015
1063	RZPDp9027A093Q	SRSF3	RZPDp9027A093Q	0.221624	8.56428	2.08807	0.0481643	0.669829	-3.84444
2861	RZPDp9027I209Q	RPS8	RZPDp9027I209Q	-0.233243	9.42711	-1.50476	0.14612	0.762868	-4.39062
6817	RZPDp9027P1117Q	PSMD8	RZPDp9027P1117Q	-0.23315	8.81063	-0.875601	0.390383	0.858189	-4.82236
959	RZPDp9028E1411Q	RALBP1	RZPDp9028E1411Q	0.220746	7.51909	2.13784	0.043486	0.669829	-3.79296
3712	RZPDp9027E2414Q	SUMF2	RZPDp9027E2414Q	-0.233109	9.69777	-1.33709	0.194389	0.784382	-4.52395
2013	RZPDp9028F0816Q	GCN1	RZPDp9028F0816Q	-0.233052	7.52678	-1.72426	0.0982007	0.731407	-4.19882
467	RZPDp9028L0510Q	MLST8	RZPDp9028L0510Q	0.220737	8.15411	2.4812	0.0209163	0.668556	-3.42238
937	RZPDp9028A246Q	BRF1	RZPDp9028A246Q	0.220347	7.41076	2.14548	0.0428052	0.669829	-3.785
3123	RZPDp9027C139Q	CYFIP1	RZPDp9027C139Q	-0.232685	8.67498	-1.44638	0.161685	0.775194	-4.43841
1125	RZPDp9027N2012Q	UBC	RZPDp9027N2012Q	-0.232573	8.22036	-2.06671	0.0503069	0.669829	-3.86633
2080	RZPDp9027H0613Q	DRG1	RZPDp9027H0613Q	-0.232496	8.76402	-1.70198	0.102363	0.736618	-4.21911
3442	RZPDp9027N1418Q	CCNL2	RZPDp9027N1418Q	-0.232158	8.40142	-1.38325	0.179992	0.783523	-4.48846
4163	RZPDp9027G1618Q	FEN1	RZPDp9027G1618Q	-0.232097	8.79691	-1.25926	0.220682	0.794319	-4.5816
1672	RZPDp9027E2116Q	PDSS2	RZPDp9027E2116Q	-0.232078	9.52378	-1.83951	0.0789039	0.703841	-4.09108
4078	RZPDp9027P1911Q	SNRPN	RZPDp9027P1911Q	-0.231848	10.5324	-1.27575	0.214894	0.790069	-4.56961
1118	RZPDp9027C216Q	SDCBP	RZPDp9027C216Q	-0.231795	9.27337	-2.06798	0.0501764	0.669829	-3.86502
3411	RZPDp9027O0613Q	FAM118B	RZPDp9027O0613Q	-0.231751	8.18256	-1.38834	0.178455	0.783523	-4.48448
2679	RZPDp9027P0411Q	SNX17	RZPDp9027P0411Q	-0.231675	9.29434	-1.5489	0.135183	0.756549	-4.35355
880	RZPDp9028P145Q	TSPYL1	RZPDp9028P145Q	0.219919	7.32591	2.17916	0.0399166	0.669829	-3.74974
1133	RZPDp9027L067Q	IGF2BP2	RZPDp9027L067Q	-0.231596	8.21479	-2.06367	0.050618	0.669829	-3.86943
895	RZPDp9028A066Q	PHF2	RZPDp9028A066Q	0.21949	7.39193	2.16544	0.0410715	0.669829	-3.76414
4120	RZPDp9027M1011Q	A2M	RZPDp9027M1011Q	-0.231163	10.2342	-1.2673	0.217845	0.792751	-4.57577
1451	RZPDp9027J2318Q	POGLUT1	RZPDp9027J2318Q	-0.230732	8.46639	-1.91451	0.0681919	0.701198	-4.01861
2534	RZPDp9028I1314Q	BBS2	RZPDp9028I1314Q	-0.230629	7.08397	-1.58205	0.127419	0.753307	-4.3252
1483	RZPDp9028P2017Q	YBX1	RZPDp9028P2017Q	-0.230516	6.98693	-1.90475	0.0695098	0.701834	-4.02814
1689	RZPDp9027L1916Q	PJA1	RZPDp9027L1916Q	-0.230365	8.81735	-1.83558	0.0795036	0.703841	-4.09482
1524	RZPDp9028F2115Q	SPATA2L	RZPDp9028F2115Q	-0.2303	8.09363	-1.88916	0.0716612	0.702767	-4.0433
1106	RZPDp9027L037Q	NSMCE1	RZPDp9027L037Q	0.219401	7.57705	2.07277	0.0496906	0.669829	-3.86013
1358	RZPDp9027K0518Q	PEF1	RZPDp9027K0518Q	-0.230211	9.03597	-1.95764	0.0626276	0.691327	-3.97614
1473	RZPDp9027L2211Q	GNAO1	RZPDp9027L2211Q	-0.230127	10.2621	-1.90816	0.0690473	0.701229	-4.02481
1074	RZPDp9027K071Q	MAZ	RZPDp9027K071Q	0.21901	8.81234	2.08397	0.0485691	0.669829	-3.84865
3451	RZPDp9027J0414Q	NCSTN	RZPDp9027J0414Q	-0.229996	9.35614	-1.38146	0.180532	0.783523	-4.48985
1436	RZPDp9027F1715Q	RBM4	RZPDp9027F1715Q	-0.22998	8.52156	-1.91982	0.067485	0.701198	-4.01341
1171	RZPDp9028G231Q	FLNB	RZPDp9028G231Q	-0.229869	7.10448	-2.04618	0.0524459	0.669905	-3.88725
187	RZPDp9027N223Q	RUSC1	RZPDp9027N223Q	0.218664	7.89924	2.85023	0.009109	0.668556	-3.00177
7416	RZPDp9028D1311Q	TASOR2	RZPDp9028D1311Q	-0.229812	7.62115	-0.796451	0.433989	0.8774	-4.86237
1109	RZPDp9028F104Q	COBL	RZPDp9028F104Q	0.218549	7.89139	2.0719	0.0497782	0.669829	-3.86102
3950	RZPDp9027A2411Q	EIF4G3	RZPDp9027A2411Q	-0.229548	9.52411	-1.29943	0.206788	0.784642	-4.55219
1181	RZPDp9027N2213Q	SEPTIN3	RZPDp9027N2213Q	-0.229334	8.233	-2.04107	0.0529907	0.670849	-3.89244
4236	RZPDp9027E1414Q	KLC1	RZPDp9027E1414Q	-0.229317	9.29049	-1.24563	0.225555	0.798334	-4.5914
2949	RZPDp9028A0511Q	FLAD1	RZPDp9028A0511Q	-0.229227	7.10145	-1.488	0.150459	0.764092	-4.40449
3005	RZPDp9027P0315Q	ENTR1	RZPDp9027P0315Q	-0.22917	9.40348	-1.47682	0.15341	0.764092	-4.41367
458	RZPDp9028D125Q	TJP3	RZPDp9028D125Q	0.218514	8.01553	2.4851	0.0207381	0.668556	-3.41804
5345	RZPDp9027I0519Q	ARHGAP39	RZPDp9027I0519Q	-0.228712	9.17321	-1.07693	0.292779	0.820901	-4.70536
1857	RZPDp9027H118Q	SUPT6H	RZPDp9027H118Q	-0.22866	7.67168	-1.77363	0.0894886	0.72138	-4.15322
1730	RZPDp9028B0115Q	CCT7	RZPDp9028B0115Q	-0.22848	7.86267	-1.81991	0.0819332	0.708934	-4.10971
4558	RZPDp9028D0921Q	FLII	RZPDp9028D0921Q	-0.228449	7.79304	-1.19073	0.246014	0.808842	-4.63001
855	RZPDp9028I2410Q	STIP1	RZPDp9028I2410Q	0.21851	7.69815	2.19257	0.0388171	0.669829	-3.73563
3481	RZPDp9028E2210Q	RIPOR2	RZPDp9028E2210Q	-0.228245	7.569	-1.37663	0.182002	0.783523	-4.4936
5409	RZPDp9027P0318Q	TUT4	RZPDp9027P0318Q	-0.22823	9.08175	-1.0675	0.296924	0.822213	-4.71131
1629	RZPDp9027C0819Q	SIRT2	RZPDp9027C0819Q	-0.228127	7.90799	-1.85141	0.0771124	0.703841	-4.0797
2101	RZPDp9028L0620Q	SYNE2	RZPDp9028L0620Q	-0.227806	8.72132	-1.69698	0.103318	0.736618	-4.22364
490	RZPDp9028D034Q	AHNAK	RZPDp9028D034Q	0.218487	7.5209	2.45577	0.0221147	0.669829	-3.45064
4188	RZPDp9028I0411Q	LCMT2	RZPDp9028I0411Q	-0.227572	8.01186	-1.25533	0.222079	0.794657	-4.58443
1449	RZPDp9027L054Q	SLC25A20	RZPDp9027L054Q	-0.227524	8.46354	-1.91517	0.0681044	0.701198	-4.01797
2277	RZPDp9027C1720Q	SLC25A4	RZPDp9027C1720Q	-0.227439	7.9836	-1.64559	0.113572	0.746045	-4.26967
5117	RZPDp9027E1218Q	C7orf50	RZPDp9027E1218Q	-0.227374	9.0285	-1.1077	0.279545	0.818916	-4.68562
2847	RZPDp9028F203Q	EHD1	RZPDp9028F203Q	-0.227297	8.40592	-1.50806	0.145277	0.762868	-4.38787
3610	RZPDp9027L2117Q	CDKN2D	RZPDp9027L2117Q	-0.227281	7.25539	-1.35277	0.1894	0.784382	-4.512
1454	RZPDp9028K2217Q	PSMB4	RZPDp9028K2217Q	-0.227073	7.55349	-1.91397	0.0682651	0.701198	-4.01914
1029	RZPDp9027J082Q	SMARCD3	RZPDp9027J082Q	0.21804	9.5451	2.09981	0.0470213	0.669829	-3.83235
5643	RZPDp9027H021Q	PPP1R2	RZPDp9027H021Q	-0.227023	8.73351	-1.03324	0.312331	0.829839	-4.73256
1584	RZPDp9027C0112Q	NUMA1	RZPDp9027C0112Q	-0.226936	8.16841	-1.86539	0.0750539	0.703841	-4.06628
2400	RZPDp9027O0312Q	TAB1	RZPDp9027O0312Q	-0.22688	8.76385	-1.6171	0.119616	0.747252	-4.29476
2563	RZPDp9027C169Q	CDK5RAP3	RZPDp9027C169Q	-0.226788	8.60874	-1.5742	0.129223	0.754853	-4.33196
2761	RZPDp9027L1910Q	GOLM2	RZPDp9027L1910Q	-0.226755	9.45915	-1.52615	0.140733	0.762868	-4.37276
2348	RZPDp9027P218Q	SACS	RZPDp9027P218Q	-0.226646	9.16051	-1.6298	0.11689	0.746301	-4.28362
3191	RZPDp9027O1312Q	CRYZL1	RZPDp9027O1312Q	-0.226555	8.93321	-1.43358	0.165271	0.775771	-4.44869
2078	RZPDp9028F0520Q	ZBTB33	RZPDp9028F0520Q	-0.226485	8.26232	-1.70287	0.102194	0.736618	-4.2183
3486	RZPDp9028J154Q	SNRNP200	RZPDp9028J154Q	-0.226463	7.27499	-1.37564	0.182306	0.783523	-4.49437
2210	RZPDp9028E0411Q	CLC	RZPDp9028E0411Q	-0.226334	7.41731	-1.66408	0.109789	0.744134	-4.25323
445	RZPDp9028E107Q	BRWD3	RZPDp9028E107Q	0.217942	7.7669	2.49738	0.0201859	0.668556	-3.40435
1419	RZPDp9027H2016Q	ARL14EP	RZPDp9027H2016Q	-0.226206	7.83673	-1.92644	0.0666114	0.701198	-4.00692
2154	RZPDp9028D0714Q	RFX5	RZPDp9028D0714Q	-0.226113	7.21336	-1.68111	0.106397	0.74044	-4.23796
2273	RZPDp9027M2310Q	NOB1	RZPDp9027M2310Q	-0.226017	7.92483	-1.64678	0.113326	0.746045	-4.26862
3353	RZPDp9027D0910Q	SEPTIN11	RZPDp9027D0910Q	-0.225943	8.92227	-1.39788	0.17561	0.783523	-4.47701
3252	RZPDp9028P054Q	ERF	RZPDp9028P054Q	-0.225941	8.50298	-1.41772	0.169803	0.782767	-4.46135
3102	RZPDp9028C222Q	INTS1	RZPDp9028C222Q	-0.22565	8.28409	-1.45148	0.160273	0.774652	-4.43429
476	RZPDp9028J174Q	COL1A2	RZPDp9028J174Q	0.217934	7.71543	2.47184	0.0213502	0.668556	-3.43279
657	RZPDp9027E164Q	BEX4	RZPDp9027E164Q	0.217856	8.74507	2.30951	0.0303297	0.669829	-3.61079
647	RZPDp9028L119Q	PEX19	RZPDp9028L119Q	0.21761	8.15689	2.31505	0.0299732	0.669829	-3.6048
1565	RZPDp9027L228Q	HNRNPA2B1	RZPDp9027L228Q	-0.225266	8.52767	-1.87295	0.0739591	0.703841	-4.05898
2073	RZPDp9028J1517Q	MIB2	RZPDp9028J1517Q	-0.225206	7.74075	-1.7043	0.101923	0.736618	-4.217
1610	RZPDp9027M1919Q	NARS1	RZPDp9027M1919Q	-0.225153	7.6618	-1.85827	0.076096	0.703841	-4.07312
1762	RZPDp9028C1819Q	HNRNPA1	RZPDp9028C1819Q	-0.225092	6.85979	-1.80829	0.0837772	0.712867	-4.12071
2054	RZPDp9028L1311Q	PHF23	RZPDp9028L1311Q	-0.224909	7.68855	-1.71156	0.100556	0.733779	-4.21041
4807	RZPDp9027I1814Q	STIP1	RZPDp9027I1814Q	-0.224774	8.98294	-1.15552	0.259851	0.809527	-4.65401
3139	RZPDp9027K0713Q	NHEJ1	RZPDp9027K0713Q	-0.224682	9.91439	-1.44399	0.162349	0.775194	-4.44033
2730	RZPDp9028P0915Q	RPL7	RZPDp9028P0915Q	-0.224199	7.71191	-1.5362	0.138259	0.759042	-4.3643
1598	RZPDp9027O0313Q	DPYSL4	RZPDp9027O0313Q	-0.224143	8.9491	-1.86115	0.0756722	0.703841	-4.07035
2848	RZPDp9027E2114Q	PAIP1	RZPDp9027E2114Q	-0.22412	9.96496	-1.50795	0.145307	0.762868	-4.38797
435	RZPDp9027F241Q	N4BP1	RZPDp9027F241Q	0.217133	8.58804	2.50817	0.0197116	0.668556	-3.39229
3163	RZPDp9027C0113Q	DNMT3A	RZPDp9027C0113Q	-0.224065	8.99725	-1.43897	0.163752	0.775771	-4.44437
906	RZPDp9027G207Q	NAB2	RZPDp9027G207Q	0.217118	8.86904	2.15993	0.0415432	0.669829	-3.7699
1459	RZPDp9027G1117Q	CNKSR2	RZPDp9027G1117Q	-0.223574	8.4442	-1.91266	0.0684407	0.701198	-4.02042
3214	RZPDp9027O2115Q	CCNG2	RZPDp9027O2115Q	-0.223428	9.30431	-1.42897	0.166577	0.776928	-4.45238
1467	RZPDp9027L1515Q	FUT8	RZPDp9027L1515Q	-0.223369	9.8107	-1.91113	0.068646	0.701229	-4.02191
604	RZPDp9027B0810Q	DDX39B	RZPDp9027B0810Q	0.216745	7.99833	2.35442	0.0275491	0.669829	-3.56206
3751	RZPDp9027C0320Q	EEF1A2	RZPDp9027C0320Q	-0.222916	7.36491	-1.33064	0.19647	0.784382	-4.52883
1613	RZPDp9027E2317Q	NUP93	RZPDp9027E2317Q	-0.222891	8.50996	-1.85764	0.0761889	0.703841	-4.07372
2452	RZPDp9028D0321Q	DNAH1	RZPDp9028D0321Q	-0.222745	7.58876	-1.60088	0.123176	0.752557	-4.30891
2969	RZPDp9027P2116Q	PHKG2	RZPDp9027P2116Q	-0.222705	9.96979	-1.48236	0.151943	0.764092	-4.40913
1615	RZPDp9027N1215Q	PHGDH	RZPDp9027N1215Q	-0.222699	7.90106	-1.85708	0.0762721	0.703841	-4.07427
2570	RZPDp9027C1216Q	MCM3	RZPDp9027C1216Q	-0.222521	10.2296	-1.57327	0.129439	0.754853	-4.33276
1929	RZPDp9028C0312Q	SHMT2	RZPDp9028C0312Q	-0.222441	7.3411	-1.75046	0.0934922	0.72666	-4.17473
1961	RZPDp9027N1416Q	ATP5F1B	RZPDp9027N1416Q	-0.222384	7.62773	-1.74025	0.0953041	0.727283	-4.18415
2530	RZPDp9028P0615Q	SAP30BP	RZPDp9028P0615Q	-0.222376	7.09088	-1.58289	0.127226	0.753307	-4.32448
600	RZPDp9027F035Q	E2F4	RZPDp9027F035Q	0.216171	8.36698	2.35942	0.0272547	0.669829	-3.55661
3546	RZPDp9027G074Q	SIL1	RZPDp9027G074Q	-0.222215	8.50023	-1.36468	0.185678	0.784382	-4.50285
5375	RZPDp9027E0512Q	BBS7	RZPDp9027E0512Q	-0.222153	8.66825	-1.07214	0.29488	0.822138	-4.70839
2119	RZPDp9027C0319Q	SEZ6	RZPDp9027C0319Q	-0.222019	7.76252	-1.69201	0.104275	0.736793	-4.22814
2065	RZPDp9028A0712Q	KBTBD8	RZPDp9028A0712Q	-0.221961	7.08065	-1.70647	0.101513	0.736338	-4.21504
3210	RZPDp9028P178Q	CACYBP	RZPDp9028P178Q	-0.221833	7.8644	-1.42974	0.16636	0.776928	-4.45177
438	RZPDp9027J243Q	KCTD17	RZPDp9027J243Q	0.214999	7.87735	2.50425	0.0198826	0.668556	-3.39667
838	RZPDp9028D1012Q	CSNK2B	RZPDp9028D1012Q	0.214626	7.21714	2.20084	0.0381526	0.669829	-3.72691
2889	RZPDp9027M2311Q	UGDH	RZPDp9027M2311Q	-0.221679	9.39898	-1.50088	0.147115	0.763252	-4.39384
3743	RZPDp9027H1310Q	HMGB1	RZPDp9027H1310Q	-0.2213	8.5792	-1.3313	0.196255	0.784382	-4.52833
1061	RZPDp9028P0413Q	TSC22D4	RZPDp9028P0413Q	0.214455	7.04649	2.08852	0.0481197	0.669829	-3.84397
4863	RZPDp9027I134Q	HIRIP3	RZPDp9027I134Q	-0.221255	8.45139	-1.14741	0.263115	0.81084	-4.65945
3997	RZPDp9027D0510Q	EPHX2	RZPDp9027D0510Q	-0.221149	8.42557	-1.29109	0.209615	0.786278	-4.55835
3744	RZPDp9027M0619Q	SKP1	RZPDp9027M0619Q	-0.221126	7.98866	-1.33127	0.196265	0.784382	-4.52835
427	RZPDp9028H144Q	HSPG2	RZPDp9028H144Q	0.213886	7.51375	2.51482	0.0194248	0.668556	-3.38486
1072	RZPDp9027A191Q	PLD3	RZPDp9027A191Q	0.213767	8.08442	2.08493	0.0484735	0.669829	-3.84766
6176	RZPDp9027E0315Q	SOX4	RZPDp9027E0315Q	-0.220613	8.9159	-0.958268	0.347984	0.844695	-4.77692
2749	RZPDp9027B132Q	YWHAE	RZPDp9027B132Q	-0.220597	8.62436	-1.52934	0.139944	0.762868	-4.37008
1787	RZPDp9027E0813Q	PACC1	RZPDp9027E0813Q	-0.220568	8.54612	-1.798	0.0854391	0.716837	-4.1304
2806	RZPDp9027H1811Q	SLA	RZPDp9027H1811Q	-0.220525	8.52227	-1.51624	0.143209	0.762868	-4.38106
1931	RZPDp9027G2212Q	CRK	RZPDp9027G2212Q	-0.220488	9.29215	-1.749	0.0937484	0.726798	-4.17607
3577	RZPDp9027M1916Q	RACK1	RZPDp9027M1916Q	-0.220357	8.19028	-1.35804	0.187745	0.784382	-4.50795
3360	RZPDp9027A0212Q	FKBP4	RZPDp9027A0212Q	-0.22023	9.70763	-1.3962	0.176107	0.783523	-4.47833
2737	RZPDp9027D0915Q	TUBA1A	RZPDp9027D0915Q	-0.220105	8.14433	-1.53361	0.138891	0.760832	-4.36648
724	RZPDp9027E024Q	MEIS2	RZPDp9027E024Q	0.213503	9.69231	2.26975	0.0330041	0.669829	-3.65358
2955	RZPDp9028M0316Q	CCDC142	RZPDp9028M0316Q	-0.220076	7.82402	-1.48679	0.150776	0.764092	-4.40548
3460	RZPDp9027L227Q	PARP1	RZPDp9027L227Q	-0.219945	8.19216	-1.38049	0.180826	0.783523	-4.4906
2095	RZPDp9028O039Q	LTA4H	RZPDp9028O039Q	-0.219857	7.73828	-1.69871	0.102986	0.736618	-4.22207
5991	RZPDp9027L0819Q	SNCA	RZPDp9027L0819Q	-0.219768	9.1855	-0.984665	0.335128	0.838685	-4.76164
2585	RZPDp9027C1620Q	COG4	RZPDp9027C1620Q	-0.219729	7.61451	-1.56789	0.130689	0.75511	-4.33737
541	RZPDp9028M025Q	FBXO41	RZPDp9028M025Q	0.212592	7.62888	2.40925	0.0244728	0.669829	-3.50202
1307	RZPDp9027M239Q	COPS6	RZPDp9027M239Q	-0.219504	7.66603	-1.98297	0.0595496	0.681307	-3.95094
3222	RZPDp9028D1817Q	PDXDC2P-NPIPB14P	RZPDp9028D1817Q	-0.219489	6.99729	-1.42754	0.166984	0.77703	-4.45352
1519	RZPDp9027K2419Q	MLST8	RZPDp9027K2419Q	-0.219294	8.89119	-1.89023	0.0715116	0.702767	-4.04226
832	RZPDp9027J143Q	CHD1L	RZPDp9027J143Q	0.212446	9.19618	2.20418	0.0378868	0.669829	-3.72337
1902	RZPDp9027I0914Q	FNTB	RZPDp9027I0914Q	-0.219135	8.94782	-1.76052	0.0917354	0.72138	-4.16541
1900	RZPDp9027O119Q	FAM32A	RZPDp9027O119Q	-0.219081	8.75581	-1.76061	0.09172	0.72138	-4.16533
3513	RZPDp9027L1018Q	HNRNPA1	RZPDp9027L1018Q	-0.21908	7.86379	-1.3714	0.183602	0.783523	-4.49765
697	RZPDp9027F159Q	GAP43	RZPDp9027F159Q	0.211346	8.42992	2.28729	0.0317987	0.669829	-3.63474
1597	RZPDp9027I0518Q	HSPA1B	RZPDp9027I0518Q	-0.219022	7.66971	-1.86204	0.0755419	0.703841	-4.06949
1406	RZPDp9027O209Q	CLTA	RZPDp9027O209Q	-0.21882	8.60948	-1.93176	0.0659167	0.701198	-4.00169
1390	RZPDp9027O1113Q	SLC35E2B	RZPDp9027O1113Q	-0.218695	10.0326	-1.93823	0.0650807	0.700528	-3.99532
3438	RZPDp9027P2110Q	TTC4	RZPDp9027P2110Q	-0.218677	8.66189	-1.38373	0.179845	0.783523	-4.48808
910	RZPDp9027H145Q	PLCE1	RZPDp9027H145Q	0.211153	7.82412	2.15882	0.0416394	0.669829	-3.77107
1617	RZPDp9028C0517Q	ZNF777	RZPDp9028C0517Q	-0.217955	7.55758	-1.85659	0.0763435	0.703841	-4.07473
2010	RZPDp9027P242Q	NPM1	RZPDp9027P242Q	-0.217852	8.77256	-1.72485	0.098093	0.731407	-4.19828
904	RZPDp9028L1412Q	ALDOC	RZPDp9028L1412Q	0.210719	7.16757	2.16038	0.0415046	0.669829	-3.76943
1315	RZPDp9027K0714Q	SPAG1	RZPDp9027K0714Q	-0.217784	9.83552	-1.98103	0.059781	0.681446	-3.95288
2353	RZPDp9027O1115Q	COPB2	RZPDp9027O1115Q	-0.217688	9.09091	-1.62838	0.117192	0.746434	-4.28487
3584	RZPDp9028E0410Q	OAS2	RZPDp9028E0410Q	-0.217686	7.4777	-1.35679	0.188136	0.784382	-4.50891
2599	RZPDp9028E0610Q	DOCK2	RZPDp9028E0610Q	-0.217557	7.37228	-1.5648	0.131411	0.75511	-4.34001
690	RZPDp9027F167Q	GORASP1	RZPDp9027F167Q	0.210556	8.60602	2.29216	0.0314715	0.669829	-3.62951
1214	RZPDp9028F0614Q	GPI	RZPDp9028F0614Q	-0.217235	7.4727	-2.02477	0.0547625	0.675717	-3.90895
1274	RZPDp9027M015Q	KPNA3	RZPDp9027M015Q	-0.217163	7.80751	-1.99637	0.0579763	0.681307	-3.93753
1678	RZPDp9028K195Q	PTPRF	RZPDp9028K195Q	-0.21705	7.66425	-1.83828	0.0790916	0.703841	-4.09225
2297	RZPDp9027L1813Q	COPS7A	RZPDp9027L1813Q	-0.217016	8.86116	-1.64064	0.114603	0.746045	-4.27405
2727	RZPDp9027L1919Q	RPS27A	RZPDp9027L1919Q	-0.216963	9.32393	-1.53714	0.138028	0.758758	-4.3635
434	RZPDp9028H166Q	IGHA2	RZPDp9028H166Q	0.210517	7.72167	2.50862	0.0196924	0.668556	-3.3918
1764	RZPDp9027A1014Q	GON4L	RZPDp9027A1014Q	-0.216837	10.6004	-1.8075	0.0839046	0.713141	-4.12146
3957	RZPDp9027I1414Q	DNAJA4	RZPDp9027I1414Q	-0.216738	9.68288	-1.29844	0.207122	0.784642	-4.55292
2017	RZPDp9027K1520Q	COMMD9	RZPDp9027K1520Q	-0.216724	7.76264	-1.72311	0.0984129	0.731535	-4.19987
3331	RZPDp9027I0413Q	RPL9	RZPDp9027I0413Q	-0.216668	9.55285	-1.4009	0.174715	0.783523	-4.47464
1000	RZPDp9028I125Q	VASP	RZPDp9028I125Q	0.210367	7.57762	2.11176	0.0458837	0.669829	-3.82001
1292	RZPDp9028N0120Q	EVL	RZPDp9028N0120Q	-0.216521	6.98071	-1.9882	0.0589316	0.681307	-3.94572
4025	RZPDp9027A194Q	PPP6R1	RZPDp9027A194Q	-0.216416	7.78805	-1.28556	0.211507	0.787459	-4.56243
1326	RZPDp9027H1112Q	TMX2	RZPDp9027H1112Q	-0.216297	8.3696	-1.97523	0.0604756	0.681699	-3.95866
3064	RZPDp9027K0712Q	EIF3K	RZPDp9027K0712Q	-0.216293	9.01716	-1.46237	0.157294	0.769681	-4.42546
3243	RZPDp9028A1820Q	IRF3	RZPDp9028A1820Q	-0.21615	7.74127	-1.4208	0.168913	0.780743	-4.45889
3118	RZPDp9027C2315Q	ABCB6	RZPDp9027C2315Q	-0.216086	8.84047	-1.44763	0.161338	0.775194	-4.4374
1942	RZPDp9027K208Q	RNASEH2A	RZPDp9027K208Q	-0.216047	8.48503	-1.74665	0.0941643	0.726798	-4.17824
2107	RZPDp9028I161Q	SCYL1	RZPDp9028I161Q	-0.216026	6.9255	-1.69557	0.103588	0.736618	-4.22492
3425	RZPDp9027G0615Q	CIC	RZPDp9027G0615Q	-0.215785	9.87133	-1.38608	0.179136	0.783523	-4.48625
2744	RZPDp9028H086Q	IL2RG	RZPDp9028H086Q	-0.215763	7.60054	-1.53146	0.139422	0.761618	-4.36829
1693	RZPDp9028F241Q	ANXA11	RZPDp9028F241Q	-0.215603	7.97739	-1.83388	0.079765	0.703841	-4.09645
2602	RZPDp9027P1614Q	EPN1	RZPDp9027P1614Q	-0.215577	9.85154	-1.56359	0.131694	0.75511	-4.34104
4300	RZPDp9027G2019Q	ACP1	RZPDp9027G2019Q	-0.215412	8.43856	-1.23357	0.229935	0.801548	-4.60001
2202	RZPDp9027O2213Q	TUBB2A	RZPDp9027O2213Q	-0.215386	9.3801	-1.6656	0.109483	0.744134	-4.25187
2792	RZPDp9027M0718Q	SF3B1	RZPDp9027M0718Q	-0.215304	7.70342	-1.51805	0.142754	0.762868	-4.37954
4101	RZPDp9027H1618Q	KPNA1	RZPDp9027H1618Q	-0.215229	7.91407	-1.27015	0.216848	0.792353	-4.5737
963	RZPDp9028F1418Q	YPEL3	RZPDp9028F1418Q	0.210245	6.97432	2.13427	0.0438073	0.669829	-3.79667
2221	RZPDp9027I1014Q	CARMIL3	RZPDp9027I1014Q	-0.214899	10.6423	-1.66072	0.110468	0.745721	-4.25622
642	RZPDp9028F224Q	GATA6	RZPDp9028F224Q	0.209888	7.68372	2.31854	0.0297511	0.669829	-3.60103
4674	RZPDp9027O038Q	DCTN3	RZPDp9027O038Q	-0.214734	9.24397	-1.17184	0.253367	0.809527	-4.64296
850	RZPDp9028N168Q	MYDGF	RZPDp9028N168Q	0.20981	7.60296	2.19462	0.0386514	0.669829	-3.73347
1087	RZPDp9028D239Q	SLC27A4	RZPDp9028D239Q	0.209064	7.69277	2.08057	0.0489065	0.669829	-3.85213
2148	RZPDp9027K0913Q	ETFB	RZPDp9027K0913Q	-0.214171	10.154	-1.68262	0.106102	0.740111	-4.2366
3276	RZPDp9027P0510Q	SGF29	RZPDp9027P0510Q	-0.214131	8.89733	-1.4127	0.171255	0.783343	-4.46532
2123	RZPDp9027K0414Q	NDUFS7	RZPDp9027K0414Q	-0.214103	10.0199	-1.69125	0.104421	0.736793	-4.22882
3502	RZPDp9027A134Q	NRDC	RZPDp9027A134Q	-0.213922	7.50142	-1.37246	0.183279	0.783523	-4.49684
5481	RZPDp9027M0113Q	AKR1B1	RZPDp9027M0113Q	-0.213879	9.39749	-1.0579	0.301188	0.823871	-4.71733
2026	RZPDp9027A2314Q	STT3B	RZPDp9027A2314Q	-0.213794	9.8421	-1.71946	0.0990858	0.73305	-4.20321
2789	RZPDp9027B1213Q	DDR1	RZPDp9027B1213Q	-0.213593	9.55363	-1.51932	0.142435	0.762868	-4.37848
1881	RZPDp9027K0314Q	ALDH2	RZPDp9027K0314Q	-0.213575	8.9216	-1.76522	0.0909249	0.72138	-4.16105
3855	RZPDp9028H0918Q	MAD1L1	RZPDp9028H0918Q	-0.21329	7.14507	-1.31416	0.201865	0.784642	-4.54121
1901	RZPDp9027D248Q	OLFM2	RZPDp9027D248Q	-0.213084	8.68659	-1.76053	0.091734	0.72138	-4.1654
1162	RZPDp9027K1318Q	ATXN10	RZPDp9027K1318Q	-0.213062	7.36139	-2.04992	0.0520496	0.669905	-3.88344
1781	RZPDp9027C1220Q	KPNB1	RZPDp9027C1220Q	-0.212907	7.54866	-1.79955	0.0851877	0.716538	-4.12895
3959	RZPDp9028D207Q	LGALS9	RZPDp9028D207Q	-0.212862	7.77084	-1.29811	0.207233	0.784642	-4.55317
5928	RZPDp9027L015Q	NSMF	RZPDp9027L015Q	-0.212802	9.20635	-0.993698	0.330804	0.83622	-4.75632
2034	RZPDp9027L1613Q	GABRA2	RZPDp9027L1613Q	-0.21276	9.19121	-1.71703	0.0995359	0.733155	-4.20542
3020	RZPDp9027M078Q	CYTH2	RZPDp9027M078Q	-0.21275	9.61837	-1.4747	0.153974	0.764414	-4.4154
3371	RZPDp9027I1614Q	CCL2	RZPDp9027I1614Q	-0.212668	10.4914	-1.39495	0.17648	0.783523	-4.47931
5464	RZPDp9027F0715Q	ANKHD1	RZPDp9027F0715Q	-0.21259	9.5113	-1.06113	0.299748	0.822498	-4.71531
3307	RZPDp9027I1818Q	ARPP21	RZPDp9027I1818Q	-0.212146	8.62347	-1.40668	0.173012	0.783523	-4.47008
1695	RZPDp9027A1112Q	GSTM2	RZPDp9027A1112Q	-0.211983	9.31736	-1.83311	0.0798831	0.703841	-4.09718
2127	RZPDp9028A1518Q	PARP10	RZPDp9028A1518Q	-0.211949	7.07507	-1.69015	0.104634	0.736793	-4.22982
1241	RZPDp9027H1813Q	ZBTB14	RZPDp9027H1813Q	-0.211936	8.61887	-2.01085	0.0563176	0.678323	-3.92299
669	RZPDp9028E077Q	MYO1C	RZPDp9028E077Q	0.209044	7.56928	2.3058	0.0305707	0.669829	-3.6148
2948	RZPDp9028B2120Q	CNOT3	RZPDp9028B2120Q	-0.211797	8.21159	-1.48805	0.150445	0.764092	-4.40444
1368	RZPDp9028M1618Q	RSAD1	RZPDp9028M1618Q	-0.211731	6.85797	-1.95159	0.0633838	0.693924	-3.98213
1779	RZPDp9027E1818Q	RAP1GAP	RZPDp9027E1818Q	-0.211722	8.28069	-1.80015	0.0850892	0.716538	-4.12838
3209	RZPDp9027C2114Q	CNP	RZPDp9027C2114Q	-0.211614	9.75963	-1.43009	0.16626	0.776795	-4.45149
1970	RZPDp9027C162Q	TRAPPC3	RZPDp9027C162Q	-0.211545	7.83735	-1.73825	0.0956621	0.728051	-4.18598
354	RZPDp9027B203Q	HNRNPU	RZPDp9027B203Q	0.208158	9.03406	2.59265	0.0163437	0.668556	-3.2973
2388	RZPDp9027A1910Q	PCDHB14	RZPDp9027A1910Q	-0.211468	7.84406	-1.61903	0.119198	0.747006	-4.29307
4615	RZPDp9027M0211Q	PPP3R1	RZPDp9027M0211Q	-0.211336	8.94873	-1.18036	0.250032	0.809527	-4.63714
1153	RZPDp9027E2218Q	USP22	RZPDp9027E2218Q	-0.211271	9.1848	-2.05272	0.0517558	0.669905	-3.8806
4527	RZPDp9027I0719Q	RPS17	RZPDp9027I0719Q	-0.211229	8.72051	-1.19646	0.243817	0.807342	-4.62605
603	RZPDp9027J127Q	KIDINS220	RZPDp9027J127Q	0.208098	9.02005	2.35464	0.0275359	0.669829	-3.56182
2309	RZPDp9028O1011Q	NAB1	RZPDp9028O1011Q	-0.210986	7.26522	-1.63802	0.115151	0.746045	-4.27636
706	RZPDp9028E075Q	THBS3	RZPDp9028E075Q	0.20709	7.35744	2.28347	0.032058	0.669829	-3.63886
5272	RZPDp9028C0521Q	PTGER4	RZPDp9028C0521Q	-0.210979	7.6025	-1.0871	0.288356	0.819707	-4.69889
673	RZPDp9028A1814Q	KCTD10	RZPDp9028A1814Q	0.207085	7.05595	2.30347	0.0307227	0.669829	-3.61731
1149	RZPDp9028B1721Q	CASP1	RZPDp9028B1721Q	-0.210897	6.82075	-2.0552	0.0514957	0.669905	-3.87807
1386	RZPDp9028I069Q	PSMC2	RZPDp9028I069Q	-0.210734	7.01745	-1.94199	0.0645984	0.69879	-3.99161
2068	RZPDp9027C1814Q	VPS45	RZPDp9027C1814Q	-0.210664	9.52561	-1.70619	0.101566	0.736338	-4.21529
1917	RZPDp9028C0411Q	RASAL3	RZPDp9028C0411Q	-0.210654	7.06061	-1.75685	0.0923735	0.722346	-4.16882
933	RZPDp9028J1219Q	LCK	RZPDp9028J1219Q	0.20672	7.61207	2.14792	0.0425898	0.669829	-3.78246
965	RZPDp9028J1619Q	RPL15	RZPDp9028J1619Q	0.206338	6.97394	2.13363	0.0438646	0.669829	-3.79733
3890	RZPDp9028D135Q	RPL36A	RZPDp9028D135Q	-0.210574	8.49322	-1.30721	0.204177	0.784642	-4.54641
520	RZPDp9027B1818Q	TRIM37	RZPDp9027B1818Q	0.206319	8.94245	2.42956	0.0234161	0.669829	-3.47964
2907	RZPDp9027F0413Q	NEURL4	RZPDp9027F0413Q	-0.210512	9.29647	-1.49639	0.148274	0.763427	-4.39756
1002	RZPDp9027N0410Q	TTC28	RZPDp9027N0410Q	0.20628	8.01192	2.11123	0.0459338	0.669829	-3.82056
1553	RZPDp9027B2312Q	PPM1G	RZPDp9027B2312Q	-0.210412	7.91502	-1.88112	0.0727938	0.702767	-4.0511
3052	RZPDp9028G2414Q	MTA2	RZPDp9028G2414Q	-0.210396	7.23207	-1.46496	0.156592	0.769262	-4.42335
1913	RZPDp9027K2013Q	GNAI2	RZPDp9027K2013Q	-0.210354	9.40364	-1.75827	0.0921254	0.72138	-4.1675
1728	RZPDp9028B138Q	DRAP1	RZPDp9028B138Q	-0.209978	7.05209	-1.82057	0.0818301	0.708934	-4.10909
2966	RZPDp9027K242Q	ENO1	RZPDp9027K242Q	-0.209959	8.09878	-1.48335	0.15168	0.764092	-4.40831
5800	RZPDp9027K0519Q	NCKAP1L	RZPDp9027K0519Q	-0.209935	9.27739	-1.01065	0.322793	0.833446	-4.74623
5115	RZPDp9027I0414Q	THOC3	RZPDp9027I0414Q	-0.209861	8.7728	-1.10825	0.279313	0.818716	-4.68527
1622	RZPDp9027L1614Q	AP2A1	RZPDp9027L1614Q	-0.209772	8.51547	-1.85495	0.0765861	0.703841	-4.0763
1679	RZPDp9027O134Q	MAN1C1	RZPDp9027O134Q	-0.209598	8.02041	-1.83825	0.0790962	0.703841	-4.09228
1985	RZPDp9027O2018Q	PDCL3	RZPDp9027O2018Q	-0.209577	9.16417	-1.73384	0.0964571	0.728206	-4.19004
2431	RZPDp9027C199Q	SEC13	RZPDp9027C199Q	-0.209421	9.09307	-1.60712	0.121797	0.751171	-4.30348
2810	RZPDp9027L0318Q	RPS23	RZPDp9027L0318Q	-0.209238	8.63659	-1.51516	0.14348	0.762868	-4.38196
1370	RZPDp9028C211Q	NEK9	RZPDp9028C211Q	-0.209097	7.68587	-1.95021	0.063557	0.693924	-3.9835
2011	RZPDp9027G0314Q	PDIA6	RZPDp9027G0314Q	-0.208982	9.57379	-1.72446	0.0981649	0.731407	-4.19864
2056	RZPDp9028G162Q	RRP7BP	RZPDp9028G162Q	-0.208834	7.51134	-1.71072	0.100714	0.734231	-4.21118
1560	RZPDp9027K156Q	SETD5	RZPDp9027K156Q	-0.208745	8.94082	-1.87724	0.0733447	0.703841	-4.05484
1296	RZPDp9027G0916Q	H2AC6	RZPDp9027G0916Q	-0.208739	8.5297	-1.9869	0.0590846	0.681307	-3.94701
2496	RZPDp9028K122Q	SAMD4B	RZPDp9028K122Q	-0.208594	8.21903	-1.59105	0.125375	0.752861	-4.31743
6598	RZPDp9027A0317Q	CNN3	RZPDp9027A0317Q	-0.20859	8.6371	-0.905392	0.374731	0.851521	-4.80641
2612	RZPDp9028B1014Q	HMGCS1	RZPDp9028B1014Q	-0.208552	7.24532	-1.56132	0.132228	0.75511	-4.34298
6236	RZPDp9027O227Q	KANSL2	RZPDp9027O227Q	-0.208473	8.53997	-0.949606	0.352275	0.845505	-4.78185
2884	RZPDp9027C039Q	GRIN1	RZPDp9027C039Q	-0.208464	8.5817	-1.50185	0.146867	0.762868	-4.39303
3387	RZPDp9027J148Q	TUBA1A	RZPDp9027J148Q	-0.208453	9.05526	-1.39182	0.177413	0.783523	-4.48176
2751	RZPDp9027B0319Q	RPL27	RZPDp9027B0319Q	-0.208356	8.512	-1.52906	0.140013	0.762868	-4.37031
1498	RZPDp9028L083Q	IGLC3	RZPDp9028L083Q	-0.208303	7.3529	-1.89899	0.0702981	0.702767	-4.03375
2384	RZPDp9027G0914Q	MTARC1	RZPDp9027G0914Q	-0.208275	9.56411	-1.62042	0.118897	0.747006	-4.29185
1019	RZPDp9027H148Q	PES1	RZPDp9027H148Q	0.205273	8.2088	2.10317	0.0466991	0.669829	-3.82888
1216	RZPDp9027M1110Q	RPS14	RZPDp9027M1110Q	-0.207524	7.9184	-2.0244	0.0548037	0.675717	-3.90932
3659	RZPDp9027B239Q	EIF6	RZPDp9027B239Q	-0.207463	9.96404	-1.34617	0.191487	0.784382	-4.51704
3468	RZPDp9027H1111Q	CD99	RZPDp9027H1111Q	-0.207279	10.5443	-1.37829	0.181495	0.783523	-4.49231
2415	RZPDp9027L2116Q	SOD2	RZPDp9027L2116Q	-0.207096	8.86056	-1.61142	0.120854	0.749902	-4.29973
1453	RZPDp9028J0420Q	GSTO1	RZPDp9028J0420Q	-0.207088	7.22301	-1.91398	0.0682629	0.701198	-4.01912
2539	RZPDp9027D074Q	HLA-B	RZPDp9027D074Q	-0.206999	8.79395	-1.581	0.127659	0.753661	-4.32611
951	RZPDp9028N1111Q	CCT8	RZPDp9028N1111Q	0.205268	7.05523	2.14001	0.0432915	0.669829	-3.7907
5311	RZPDp9027J108Q	KLC1	RZPDp9027J108Q	-0.206961	9.3478	-1.08144	0.290814	0.82082	-4.7025
1637	RZPDp9028O106Q	MAP7D1	RZPDp9028O106Q	-0.206846	7.45309	-1.84901	0.0774715	0.703841	-4.082
7426	RZPDp9027P015Q	HNRNPDL	RZPDp9027P015Q	-0.206754	8.30827	-0.795333	0.434626	0.877485	-4.86291
1946	RZPDp9027P069Q	SIRT7	RZPDp9027P069Q	-0.206664	7.70368	-1.74538	0.0943905	0.727234	-4.17942
3657	RZPDp9027B0510Q	XRCC6	RZPDp9027B0510Q	-0.206658	9.12338	-1.34655	0.191366	0.784382	-4.51675
2432	RZPDp9027F1619Q	MTM1	RZPDp9027F1619Q	-0.206526	8.56369	-1.6064	0.121954	0.751833	-4.3041
2930	RZPDp9027A1318Q	ITGB1BP2	RZPDp9027A1318Q	-0.206435	8.42149	-1.49266	0.149243	0.763499	-4.40064
2111	RZPDp9027P079Q	SORD	RZPDp9027P079Q	-0.206406	9.22898	-1.69491	0.103715	0.736618	-4.22551
1826	RZPDp9028L1619Q	RPS6KA4	RZPDp9028L1619Q	-0.206202	7.2991	-1.78163	0.0881427	0.72138	-4.14576
1783	RZPDp9028L0914Q	ATAD3B	RZPDp9028L0914Q	-0.206175	7.95437	-1.79916	0.0852512	0.716538	-4.12932
5933	RZPDp9027O1315Q	STAG2	RZPDp9027O1315Q	-0.206033	8.39042	-0.993482	0.330907	0.83622	-4.75645
3719	RZPDp9027G1415Q	RABL6	RZPDp9027G1415Q	-0.205899	9.61727	-1.33555	0.194884	0.784382	-4.52512
2734	RZPDp9028M1921Q	GTF3C1	RZPDp9028M1921Q	-0.205794	8.65105	-1.53478	0.138605	0.760099	-4.3655
4473	RZPDp9027F179Q	PCDHGA2	RZPDp9027F179Q	-0.205758	8.35927	-1.20638	0.240047	0.804408	-4.61916
819	RZPDp9027E104Q	TRAF4	RZPDp9027E104Q	0.204984	9.06182	2.21257	0.037228	0.669829	-3.71451
2622	RZPDp9027C2113Q	BIN3	RZPDp9027C2113Q	-0.205544	9.87127	-1.55934	0.132696	0.75511	-4.34467
2345	RZPDp9027K102Q	CDK5RAP3	RZPDp9027K102Q	-0.205355	9.19584	-1.63053	0.116734	0.746045	-4.28297
1182	RZPDp9027O2218Q	ANAPC5	RZPDp9027O2218Q	-0.205294	7.93494	-2.04106	0.0529914	0.670849	-3.89245
4230	RZPDp9027E0413Q	RAP1GAP	RZPDp9027E0413Q	-0.205274	9.6259	-1.24717	0.225002	0.79737	-4.5903
3316	RZPDp9027H2010Q	PRPF6	RZPDp9027H2010Q	-0.205267	9.27231	-1.40504	0.173494	0.783523	-4.47138
1802	RZPDp9028K198Q	UBC	RZPDp9028K198Q	-0.205264	7.61029	-1.79312	0.0862378	0.717103	-4.13499
3111	RZPDp9027J1213Q	EIF4G2	RZPDp9027J1213Q	-0.205261	9.36743	-1.44915	0.160917	0.775194	-4.43617
2801	RZPDp9027M2318Q	APOH	RZPDp9027M2318Q	-0.204974	8.47328	-1.51645	0.143156	0.762868	-4.38088
2759	RZPDp9027G2014Q	HNRNPC	RZPDp9027G2014Q	-0.204943	10.0164	-1.52662	0.140616	0.762868	-4.37236
3042	RZPDp9027M0814Q	DPP9	RZPDp9027M0814Q	-0.20491	9.848	-1.46799	0.155774	0.767246	-4.42088
2781	RZPDp9028O1720Q	RPL35A	RZPDp9028O1720Q	-0.20485	7.55788	-1.52214	0.141731	0.762868	-4.37612
787	RZPDp9027M072Q	ANKZF1	RZPDp9027M072Q	0.204376	9.27905	2.23334	0.0356395	0.669829	-3.69246
2493	RZPDp9027G1214Q	TXNIP	RZPDp9027G1214Q	-0.204804	10.5003	-1.59135	0.125309	0.752861	-4.31718
1608	RZPDp9028C1513Q	GPATCH8	RZPDp9028C1513Q	-0.204797	7.84914	-1.85908	0.0759766	0.703841	-4.07234
1404	RZPDp9027E0216Q	PRADC1	RZPDp9027E0216Q	-0.204791	7.85065	-1.93207	0.065876	0.701198	-4.00138
887	RZPDp9028B148Q	CBX6	RZPDp9028B148Q	0.203879	7.30047	2.17025	0.0406632	0.669829	-3.7591
1577	RZPDp9028E099Q	CHMP4B	RZPDp9028E099Q	-0.204567	7.45681	-1.86838	0.0746185	0.703841	-4.06339
1229	RZPDp9028O212Q	MYO5B	RZPDp9028O212Q	-0.20443	7.87975	-2.01731	0.0555916	0.678182	-3.91648
1867	RZPDp9028D2121Q	APBA3	RZPDp9028D2121Q	-0.204391	7.75424	-1.76934	0.09022	0.72138	-4.15722
3287	RZPDp9027A1814Q	DTYMK	RZPDp9027A1814Q	-0.204381	10.0369	-1.41058	0.171873	0.783523	-4.467
3690	RZPDp9027E1413Q	TSPAN3	RZPDp9027E1413Q	-0.204379	8.37665	-1.34055	0.193277	0.784382	-4.52132
2581	RZPDp9028L0817Q	FPGS	RZPDp9028L0817Q	-0.204364	7.77852	-1.56968	0.13027	0.75511	-4.33583
201	RZPDp9028E163Q	NSD1	RZPDp9028E163Q	0.203563	7.12236	2.82898	0.00956563	0.668556	-3.02642
2632	RZPDp9028O0621Q	PPP1R15A	RZPDp9028O0621Q	-0.204226	7.33405	-1.55802	0.133008	0.75511	-4.34579
2533	RZPDp9027K1111Q	PARP6	RZPDp9027K1111Q	-0.204207	9.43249	-1.58244	0.127329	0.753307	-4.32486
2135	RZPDp9027J096Q	PSMA1	RZPDp9027J096Q	-0.204183	9.43261	-1.68834	0.104985	0.736917	-4.23145
680	RZPDp9027E103Q	YWHAQ	RZPDp9027E103Q	0.202282	9.15906	2.29896	0.0310193	0.669829	-3.62218
1425	RZPDp9027H248Q	ATP5PO	RZPDp9027H248Q	-0.204138	9.42467	-1.92402	0.0669299	0.701198	-4.0093
1873	RZPDp9028B2116Q	RCL1	RZPDp9028B2116Q	-0.204112	7.25142	-1.76778	0.0904864	0.72138	-4.15867
4272	RZPDp9027M2414Q	GNAI2	RZPDp9027M2414Q	-0.204063	9.76101	-1.23901	0.22795	0.799985	-4.59613
2136	RZPDp9028J042Q	PTPN12	RZPDp9028J042Q	-0.203938	7.4076	-1.68834	0.104986	0.736917	-4.23145
2417	RZPDp9027A0910Q	HSPA9	RZPDp9027A0910Q	-0.203721	9.00519	-1.61092	0.120962	0.749902	-4.30016
1399	RZPDp9028C085Q	ITGA3	RZPDp9028C085Q	-0.203646	8.04623	-1.93441	0.0655733	0.701198	-3.99909
1535	RZPDp9028C1810Q	ARRB2	RZPDp9028C1810Q	-0.203584	8.07663	-1.88475	0.0722799	0.702767	-4.04757
2491	RZPDp9027G2218Q	TSPAN7	RZPDp9027G2218Q	-0.203355	9.05284	-1.592	0.125163	0.752861	-4.31661
1828	RZPDp9027M2014Q	TSKU	RZPDp9027M2014Q	-0.203122	8.21412	-1.78145	0.0881715	0.72138	-4.14592
1531	RZPDp9027K0517Q	UBE2S	RZPDp9027K0517Q	-0.203117	8.44913	-1.88576	0.0721375	0.702767	-4.04659
953	RZPDp9027P144Q	HNRNPM	RZPDp9027P144Q	0.201693	8.55558	2.13941	0.0433448	0.669829	-3.79132
6611	RZPDp9027M016Q	CSNK2B	RZPDp9027M016Q	-0.20299	9.15227	-0.903595	0.375663	0.851962	-4.80739
1850	RZPDp9028O0120Q	MCM7	RZPDp9028O0120Q	-0.202973	8.13073	-1.77544	0.0891838	0.72138	-4.15154
2560	RZPDp9028K108Q	PRPF6	RZPDp9028K108Q	-0.20288	7.78725	-1.57513	0.129009	0.754853	-4.33116
2782	RZPDp9027K225Q	WASF1	RZPDp9027K225Q	-0.202817	9.38848	-1.52212	0.141735	0.762868	-4.37614
2088	RZPDp9027D218Q	EIF1	RZPDp9027D218Q	-0.202778	8.60623	-1.6999	0.102761	0.736618	-4.221
2526	RZPDp9027L2411Q	MRPS18A	RZPDp9027L2411Q	-0.202771	9.75794	-1.58421	0.126925	0.753307	-4.32334
5347	RZPDp9027E1311Q	YWHAG	RZPDp9027E1311Q	-0.202732	9.1202	-1.0766	0.292926	0.820901	-4.70557
2913	RZPDp9027G1313Q	UBB	RZPDp9027G1313Q	-0.202688	8.91512	-1.49598	0.14838	0.763427	-4.39789
4037	RZPDp9027G115Q	H2AW	RZPDp9027G115Q	-0.202687	8.67915	-1.28273	0.21248	0.788856	-4.56451
3187	RZPDp9027G1310Q	KIAA1614	RZPDp9027G1310Q	-0.20263	8.94928	-1.43445	0.165025	0.775771	-4.448
696	RZPDp9028J141Q	PA2G4	RZPDp9028J141Q	0.201534	7.78806	2.28889	0.0316911	0.669829	-3.63303
1257	RZPDp9028C2015Q	HLA-B	RZPDp9028C2015Q	-0.202482	7.19896	-2.00367	0.0571345	0.679423	-3.93021
2465	RZPDp9027D1714Q	ACSL3	RZPDp9027D1714Q	-0.202249	9.60668	-1.59774	0.123875	0.752632	-4.31163
919	RZPDp9028K026Q	RPL36	RZPDp9028K026Q	0.201443	7.45199	2.15597	0.0418857	0.669829	-3.77405
752	RZPDp9027L123Q	FAM168B	RZPDp9027L123Q	0.200823	8.31564	2.2559	0.033985	0.669829	-3.66841
5200	RZPDp9028G0210Q	DOCK9	RZPDp9028G0210Q	-0.202051	8.03313	-1.09645	0.284332	0.819564	-4.69289
5335	RZPDp9028P085Q	PITPNM1	RZPDp9028P085Q	-0.201938	7.94631	-1.07786	0.292372	0.820901	-4.70477
5413	RZPDp9027D0618Q	HABP4	RZPDp9027D0618Q	-0.201835	8.54823	-1.0674	0.296967	0.822213	-4.71138
3204	RZPDp9028J2220Q	RFX1	RZPDp9028J2220Q	-0.201594	6.93682	-1.43157	0.16584	0.775868	-4.4503
3735	RZPDp9027K1614Q	YWHAE	RZPDp9027K1614Q	-0.201583	9.37046	-1.33284	0.195758	0.784382	-4.52717
1320	RZPDp9027K0119Q	PFDN1	RZPDp9027K0119Q	-0.201456	7.41878	-1.97885	0.0600416	0.681699	-3.95506
1053	RZPDp9028N207Q	FLOT2	RZPDp9028N207Q	0.200687	7.46014	2.09159	0.0478189	0.669829	-3.84081
1744	RZPDp9028G1910Q	TRMT1	RZPDp9028G1910Q	-0.201308	7.27402	-1.81495	0.0827171	0.710797	-4.11442
3490	RZPDp9028E231Q	FOXJ1	RZPDp9028E231Q	-0.201215	8.18883	-1.37476	0.182575	0.783523	-4.49506
5061	RZPDp9027C189Q	RBM25	RZPDp9027C189Q	-0.2012	8.7128	-1.11636	0.275901	0.817196	-4.67998
1446	RZPDp9028G1413Q	ADGRE5	RZPDp9028G1413Q	-0.200972	7.19331	-1.91566	0.0680384	0.701198	-4.01748
3469	RZPDp9027A1612Q	WNK2	RZPDp9027A1612Q	-0.200911	8.40683	-1.37818	0.18153	0.783523	-4.4924
2311	RZPDp9028A0114Q	CLTA	RZPDp9028A0114Q	-0.200865	7.03691	-1.63791	0.115175	0.746045	-4.27646
1146	RZPDp9028O139Q	CCDC88B	RZPDp9028O139Q	-0.200735	7.79462	-2.05579	0.0514342	0.669905	-3.87747
3646	RZPDp9027M158Q	SORBS2	RZPDp9027M158Q	-0.200628	8.90857	-1.34799	0.190908	0.784382	-4.51565
1835	RZPDp9027L1616Q	BOC	RZPDp9027L1616Q	-0.20058	10.1852	-1.78057	0.0883201	0.72138	-4.14675
1556	RZPDp9027G058Q	TRAPPC3	RZPDp9027G058Q	-0.200511	8.66005	-1.87925	0.0730583	0.703628	-4.0529
502	RZPDp9027C192Q	AKR7A2	RZPDp9027C192Q	0.200407	10.0234	2.44339	0.0227207	0.669829	-3.46435
2454	RZPDp9027L2017Q	CHST12	RZPDp9027L2017Q	-0.200479	7.53106	-1.60056	0.123248	0.752557	-4.30919
1051	RZPDp9028N077Q	TSFM	RZPDp9028N077Q	0.200319	7.48173	2.09172	0.0478059	0.669829	-3.84068
7860	RZPDp9027I2011Q	WNK2	RZPDp9027I2011Q	-0.20026	10.6445	-0.742336	0.465467	0.887775	-4.88771
7826	RZPDp9027D0314Q	STMN4	RZPDp9027D0314Q	-0.20016	10.9152	-0.746144	0.463208	0.887078	-4.88598
4650	RZPDp9028D059Q	NFX1	RZPDp9028D059Q	-0.199992	7.80302	-1.17454	0.252306	0.809527	-4.64112
2834	RZPDp9028O2313Q	KPNB1	RZPDp9028O2313Q	-0.199971	7.53259	-1.51003	0.144777	0.762868	-4.38623
2063	RZPDp9028M2110Q	DFFA	RZPDp9028M2110Q	-0.199894	7.15311	-1.70835	0.101158	0.735151	-4.21333
3866	RZPDp9027P1412Q	TTLL12	RZPDp9027P1412Q	-0.199774	8.45586	-1.31175	0.202665	0.784642	-4.54302
969	RZPDp9028B217Q	ARID1A	RZPDp9028B217Q	0.200215	7.43603	2.13056	0.0441438	0.669829	-3.80053
1136	RZPDp9027G2314Q	STMN3	RZPDp9027G2314Q	-0.199668	9.53684	-2.06064	0.0509309	0.669905	-3.87252
692	RZPDp9027M0310Q	PHF5A	RZPDp9027M0310Q	0.199993	7.55418	2.28978	0.0316309	0.669829	-3.63207
2451	RZPDp9027C1519Q	CCDC149	RZPDp9027C1519Q	-0.19966	7.64224	-1.60093	0.123164	0.752557	-4.30886
5318	RZPDp9027H2312Q	PTPRM	RZPDp9027H2312Q	-0.19958	9.68643	-1.08004	0.291422	0.820901	-4.70339
3100	RZPDp9027B1914Q	PRDX2	RZPDp9027B1914Q	-0.199423	9.30339	-1.45168	0.160218	0.774652	-4.43412
3773	RZPDp9027K0719Q	SOGA1	RZPDp9027K0719Q	-0.199413	8.64034	-1.32718	0.197594	0.784382	-4.53144
1116	RZPDp9028C1920Q	OSBPL3	RZPDp9028C1920Q	-0.199364	6.96114	-2.06815	0.05016	0.669829	-3.86486
4846	RZPDp9027D1310Q	DEPDC5	RZPDp9027D1310Q	-0.199336	8.8891	-1.15058	0.261834	0.809777	-4.65733
3068	RZPDp9027F2313Q	EBNA1BP2	RZPDp9027F2313Q	-0.199277	9.49803	-1.4609	0.157695	0.770638	-4.42666
2099	RZPDp9027G211Q	RPLP0	RZPDp9027G211Q	-0.19903	8.41832	-1.69788	0.103145	0.736618	-4.22282
4990	RZPDp9027E0113Q	FDFT1	RZPDp9027E0113Q	-0.199024	8.35906	-1.12816	0.270991	0.813921	-4.67224
3544	RZPDp9027O034Q	MMUT	RZPDp9027O034Q	-0.198772	9.44062	-1.36517	0.185525	0.784382	-4.50247
1623	RZPDp9027P2411Q	CYCS	RZPDp9027P2411Q	-0.19869	9.06233	-1.85274	0.0769149	0.703841	-4.07843
4006	RZPDp9027E2310Q	VAT1	RZPDp9027E2310Q	-0.198655	9.06875	-1.28898	0.210336	0.787175	-4.55991
954	RZPDp9028B0416Q	MAP3K4	RZPDp9028B0416Q	0.199702	6.97795	2.13924	0.0433606	0.669829	-3.7915
1854	RZPDp9028E0717Q	TRAP1	RZPDp9028E0717Q	-0.19844	7.40552	-1.77405	0.089418	0.72138	-4.15283
4787	RZPDp9027A2012Q	B3GAT1	RZPDp9027A2012Q	-0.198425	9.7629	-1.15771	0.258972	0.809527	-4.65254
1352	RZPDp9027J1415Q	NNT	RZPDp9027J1415Q	-0.198012	8.82372	-1.96233	0.062048	0.688081	-3.97149
3630	RZPDp9028O0215Q	GSTK1	RZPDp9028O0215Q	-0.197931	7.84452	-1.35033	0.190169	0.784382	-4.51386
3303	RZPDp9027K112Q	RASSF1	RZPDp9027K112Q	-0.197832	9.29684	-1.40741	0.1728	0.783523	-4.46951
2146	RZPDp9027K118Q	TUBA1A	RZPDp9027K118Q	-0.197538	8.98435	-1.68326	0.105975	0.740111	-4.23602
4954	RZPDp9028F1914Q	GNAI2	RZPDp9028F1914Q	-0.197495	7.07461	-1.13495	0.268194	0.81161	-4.66775
4948	RZPDp9027I0114Q	NSG2	RZPDp9027I0114Q	-0.197422	8.58544	-1.13532	0.26804	0.81161	-4.6675
1746	RZPDp9028I1215Q	RPS8	RZPDp9028I1215Q	-0.197146	7.22543	-1.81317	0.0829989	0.711387	-4.1161
2249	RZPDp9027P0614Q	MED8	RZPDp9027P0614Q	-0.197071	10.158	-1.65296	0.11205	0.746045	-4.26313
2447	RZPDp9027D0916Q	GRB2	RZPDp9027D0916Q	-0.197025	8.19943	-1.60145	0.123049	0.752557	-4.30841
2693	RZPDp9027H0817Q	COMMD3	RZPDp9027H0817Q	-0.196784	7.48353	-1.54514	0.136087	0.757387	-4.35674
1550	RZPDp9027O1119Q	ZNF160	RZPDp9027O1119Q	-0.196679	7.40807	-1.88158	0.0727278	0.702767	-4.05064
2487	RZPDp9027G2010Q	DCHS1	RZPDp9027G2010Q	-0.196514	9.14148	-1.59317	0.124898	0.752861	-4.31559
5203	RZPDp9027G2311Q	MDH2	RZPDp9027G2311Q	-0.1965	9.33231	-1.09619	0.284446	0.819564	-4.69307
2228	RZPDp9027E0914Q	AZI2	RZPDp9027E0914Q	-0.196436	9.27854	-1.65835	0.110949	0.746045	-4.25833
5527	RZPDp9028C109Q	PANK4	RZPDp9028C109Q	-0.196398	7.92508	-1.05162	0.303996	0.82441	-4.72123
2032	RZPDp9028J1920Q	STK38	RZPDp9028J1920Q	-0.196393	6.83486	-1.71765	0.0994207	0.733155	-4.20486
2349	RZPDp9028H0810Q	UBC	RZPDp9028H0810Q	-0.19625	7.28899	-1.62963	0.116925	0.746301	-4.28376
1683	RZPDp9027L088Q	RETREG2	RZPDp9027L088Q	-0.19623	8.65561	-1.83772	0.0791771	0.703841	-4.09279
2141	RZPDp9027M0314Q	VPS37B	RZPDp9027M0314Q	-0.196131	9.12268	-1.68606	0.105428	0.737979	-4.2335
326	RZPDp9028H157Q	TTC7A	RZPDp9028H157Q	0.198485	7.28523	2.62469	0.0152138	0.668556	-3.261
4434	RZPDp9027O0214Q	WWC1	RZPDp9027O0214Q	-0.196105	10.2569	-1.21262	0.237695	0.802976	-4.61479
4851	RZPDp9027A018Q	NUDT3	RZPDp9027A018Q	-0.196051	8.76295	-1.1501	0.26203	0.809777	-4.65765
1843	RZPDp9027F2217Q	MPST	RZPDp9027F2217Q	-0.195944	8.76504	-1.77795	0.0887601	0.72138	-4.14919
4461	RZPDp9028M1418Q	ZGPAT	RZPDp9028M1418Q	-0.195863	7.46722	-1.2086	0.239208	0.803834	-4.6176
2272	RZPDp9027F0719Q	SUCLG1	RZPDp9027F0719Q	-0.195763	8.19352	-1.64708	0.113264	0.746045	-4.26835
1239	RZPDp9027O059Q	PIP4P1	RZPDp9027O059Q	-0.19573	8.74037	-2.01097	0.056304	0.678323	-3.92287
4920	RZPDp9027O228Q	DHX36	RZPDp9027O228Q	-0.195652	8.40991	-1.13841	0.266775	0.81161	-4.66545
1651	RZPDp9027K018Q	NIP7	RZPDp9027K018Q	-0.195543	7.85813	-1.84519	0.0780446	0.703841	-4.08565
2242	RZPDp9027C2417Q	SRPK2	RZPDp9027C2417Q	-0.195451	8.89064	-1.65402	0.111832	0.746045	-4.26218
2601	RZPDp9027O0217Q	RPL17	RZPDp9027O0217Q	-0.195445	9.0148	-1.56365	0.13168	0.75511	-4.34099
2183	RZPDp9028M052Q	EPN1	RZPDp9028M052Q	-0.195255	7.30283	-1.67137	0.108325	0.743695	-4.2467
2198	RZPDp9027C027Q	FLNA	RZPDp9027C027Q	-0.195172	8.54039	-1.66621	0.10936	0.744134	-4.25132
2459	RZPDp9027G209Q	FEZF2	RZPDp9027G209Q	-0.195146	8.59585	-1.59946	0.123491	0.752557	-4.31014
1574	RZPDp9027E0610Q	TTC38	RZPDp9027E0610Q	-0.195104	7.75631	-1.87014	0.0743645	0.703841	-4.0617
560	RZPDp9028O023Q	DBNL	RZPDp9028O023Q	0.19843	6.94577	2.39023	0.0255022	0.669829	-3.52292
489	RZPDp9027A085Q	CRYM	RZPDp9027A085Q	0.197033	8.01123	2.4565	0.0220795	0.669829	-3.44983
2958	RZPDp9027A2017Q	TOE1	RZPDp9027A2017Q	-0.19494	8.30853	-1.48612	0.150952	0.764092	-4.40603
1616	RZPDp9028K031Q	PDIA4	RZPDp9028K031Q	-0.194655	7.32705	-1.85668	0.0763306	0.703841	-4.07465
2458	RZPDp9028K1619Q	NACA	RZPDp9028K1619Q	-0.194515	6.80562	-1.59959	0.123463	0.752557	-4.31003
6200	RZPDp9027P0310Q	OTUB1	RZPDp9027P0310Q	-0.194471	9.034	-0.953968	0.35011	0.845505	-4.77937
2987	RZPDp9027D0418Q	ARPC2	RZPDp9027D0418Q	-0.19437	8.27875	-1.47867	0.152918	0.764092	-4.41215
1234	RZPDp9028L0816Q	LCP2	RZPDp9028L0816Q	-0.19436	6.80154	-2.01248	0.0561339	0.678323	-3.92135
4312	RZPDp9027L0910Q	ZNF692	RZPDp9027L0910Q	-0.194325	9.27323	-1.23097	0.230889	0.801548	-4.60186
1488	RZPDp9028L0919Q	APBA3	RZPDp9028L0919Q	-0.194257	7.56736	-1.90343	0.0696895	0.701834	-4.02942
3951	RZPDp9027D0410Q	MYOZ3	RZPDp9027D0410Q	-0.194193	8.47356	-1.29932	0.206824	0.784642	-4.55227
2437	RZPDp9028C018Q	UBL4A	RZPDp9028C018Q	-0.194131	7.62422	-1.60464	0.122344	0.752557	-4.30564
2472	RZPDp9027O1218Q	TUBB4B	RZPDp9027O1218Q	-0.193939	9.00778	-1.59599	0.124267	0.752632	-4.31316
3491	RZPDp9027E1213Q	TMEM94	RZPDp9027E1213Q	-0.193743	8.98162	-1.37452	0.182648	0.783523	-4.49524
2507	RZPDp9027K226Q	NECAP2	RZPDp9027K226Q	-0.193695	9.50343	-1.58853	0.125944	0.753116	-4.31961
3575	RZPDp9028I2116Q	KMT2A	RZPDp9028I2116Q	-0.193633	6.80445	-1.35816	0.187709	0.784382	-4.50787
4833	RZPDp9028G081Q	FBRS	RZPDp9028G081Q	-0.19358	7.60918	-1.15259	0.261027	0.809537	-4.65598
790	RZPDp9028J172Q	FHL2	RZPDp9028J172Q	0.196868	7.77178	2.23256	0.0356981	0.669829	-3.69329
3444	RZPDp9027D2211Q	RPS16	RZPDp9027D2211Q	-0.193034	8.49346	-1.38308	0.180042	0.783523	-4.48859
2597	RZPDp9028K041Q	NXPH3	RZPDp9028K041Q	-0.193013	7.59392	-1.56531	0.131293	0.75511	-4.33958
1546	RZPDp9027C209Q	UBQLN2	RZPDp9027C209Q	-0.192952	8.099	-1.88264	0.0725779	0.702767	-4.04962
4238	RZPDp9027C2013Q	CPOX	RZPDp9027C2013Q	-0.192932	9.56035	-1.24507	0.225755	0.798362	-4.5918
2299	RZPDp9027E1013Q	NUDT11	RZPDp9027E1013Q	-0.192902	9.02323	-1.6404	0.114654	0.746045	-4.27426
6545	RZPDp9027D0814Q	CHCHD2	RZPDp9027D0814Q	-0.192897	8.97461	-0.912446	0.371086	0.849906	-4.80256
3201	RZPDp9027L0518Q	ZBTB5	RZPDp9027L0518Q	-0.192889	8.97504	-1.43225	0.165647	0.775771	-4.44976
3065	RZPDp9027J0713Q	PSIP1	RZPDp9027J0713Q	-0.192768	9.93033	-1.46207	0.157376	0.769831	-4.4257
3606	RZPDp9027N0617Q	ACTR10	RZPDp9027N0617Q	-0.192558	8.97395	-1.35385	0.18906	0.784382	-4.51117
3289	RZPDp9027P2418Q	QARS1	RZPDp9027P2418Q	-0.192517	8.59991	-1.41019	0.171988	0.783523	-4.46731
2196	RZPDp9028M2316Q	RPL12	RZPDp9028M2316Q	-0.19251	7.59291	-1.66691	0.109218	0.744134	-4.25069
3780	RZPDp9027I0810Q	UBE2V2	RZPDp9027I0810Q	-0.192448	9.01519	-1.32612	0.197937	0.784382	-4.53223
1872	RZPDp9028L153Q	KIAA1217	RZPDp9028L153Q	-0.192398	7.10013	-1.76798	0.0904517	0.72138	-4.15848
984	RZPDp9028I095Q	RHNO1	RZPDp9028I095Q	0.196855	7.79348	2.11981	0.0451306	0.669829	-3.81167
2809	RZPDp9028O1517Q	PKM	RZPDp9028O1517Q	-0.192243	7.39149	-1.51553	0.143386	0.762868	-4.38164
1696	RZPDp9028K0311Q	AIP	RZPDp9028K0311Q	-0.192177	7.77562	-1.83304	0.0798929	0.703841	-4.09724
4926	RZPDp9027N077Q	OAZ1	RZPDp9027N077Q	-0.192157	8.77587	-1.13746	0.267166	0.81161	-4.66609
2975	RZPDp9027F2413Q	BCCIP	RZPDp9027F2413Q	-0.192134	8.79148	-1.48082	0.152347	0.764092	-4.41038
1763	RZPDp9027E1618Q	HNRNPK	RZPDp9027E1618Q	-0.192101	7.61441	-1.80759	0.0838899	0.713141	-4.12137
3652	RZPDp9027K195Q	AKR1A1	RZPDp9027K195Q	-0.192068	8.30163	-1.34695	0.191239	0.784382	-4.51644
5064	RZPDp9027M1712Q	SART3	RZPDp9027M1712Q	-0.191978	8.25483	-1.11609	0.276014	0.817196	-4.68016
2076	RZPDp9028B221Q	TALDO1	RZPDp9028B221Q	-0.191952	9.05934	-1.70294	0.102182	0.736618	-4.21825
2498	RZPDp9027C1019Q	PLEKHG2	RZPDp9027C1019Q	-0.191914	7.8437	-1.59059	0.12548	0.752861	-4.31783
1715	RZPDp9028P051Q	DEPDC5	RZPDp9028P051Q	-0.19187	8.05664	-1.82711	0.0808093	0.706457	-4.10288
6205	RZPDp9027M2211Q	PHIP	RZPDp9027M2211Q	-0.191816	9.69532	-0.953375	0.350404	0.845505	-4.77971
2293	RZPDp9027O176Q	FKBP8	RZPDp9027O176Q	-0.191778	10.0399	-1.64212	0.114295	0.746045	-4.27274
1832	RZPDp9027O0711Q	PODXL2	RZPDp9027O0711Q	-0.191712	10.1396	-1.78094	0.0882582	0.72138	-4.1464
1382	RZPDp9028B232Q	PKP1	RZPDp9028B232Q	-0.191638	7.66116	-1.94677	0.0639914	0.694228	-3.9869
3427	RZPDp9028J2417Q	SNRNP35	RZPDp9028J2417Q	-0.191553	7.59839	-1.38603	0.17915	0.783523	-4.48628
1508	RZPDp9027G033Q	GPC1	RZPDp9027G033Q	-0.191526	9.00311	-1.89336	0.0710758	0.702767	-4.03922
2999	RZPDp9027G2011Q	MPP1	RZPDp9027G2011Q	-0.191515	9.50485	-1.47747	0.153237	0.764092	-4.41313
1766	RZPDp9028C0617Q	TCEA1	RZPDp9028C0617Q	-0.191435	7.0091	-1.80669	0.084034	0.713432	-4.12222
4137	RZPDp9027E2016Q	RRP1	RZPDp9027E2016Q	-0.191359	10.1531	-1.26338	0.219226	0.793953	-4.57862
5062	RZPDp9028E0611Q	REX1BD	RZPDp9028E0611Q	-0.191331	8.75421	-1.11623	0.275956	0.817196	-4.68007
1632	RZPDp9027L0516Q	CCND2	RZPDp9027L0516Q	-0.19129	9.09024	-1.85128	0.0771314	0.703841	-4.07982
6725	RZPDp9027I231Q	SMARCD1	RZPDp9027I231Q	-0.19123	8.58276	-0.888085	0.383773	0.855599	-4.81574
942	RZPDp9028A1910Q	GCC2	RZPDp9028A1910Q	0.19645	7.54168	2.14426	0.0429129	0.669829	-3.78627
6057	RZPDp9027M1611Q	ZNF74	RZPDp9027M1611Q	-0.19111	8.56705	-0.97573	0.339443	0.840044	-4.76685
3848	RZPDp9027F0414Q	MRPL23	RZPDp9027F0414Q	-0.190996	8.95815	-1.3153	0.201491	0.784642	-4.54037
4038	RZPDp9028L2215Q	GCN1	RZPDp9028L2215Q	-0.190937	7.83195	-1.28268	0.212497	0.788856	-4.56454
3849	RZPDp9027F1110Q	SLC25A6	RZPDp9027F1110Q	-0.190932	9.63459	-1.31521	0.201519	0.784642	-4.54043
1661	RZPDp9028H111Q	H2AX	RZPDp9028H111Q	-0.190906	7.2076	-1.84303	0.0783701	0.703841	-4.08771
6292	RZPDp9027M138Q	UBL7	RZPDp9027M138Q	-0.190782	8.6433	-0.944236	0.354953	0.845505	-4.78489
2670	RZPDp9027K146Q	MAGEH1	RZPDp9027K146Q	-0.190756	9.58199	-1.55141	0.134582	0.755366	-4.35142
2574	RZPDp9027D1516Q	SEMA4C	RZPDp9027D1516Q	-0.190661	9.21749	-1.5718	0.129779	0.75511	-4.33402
8360	RZPDp9028I023Q	NKX2-1	RZPDp9028I023Q	-0.190546	8.67446	-0.685149	0.50016	0.89653	-4.91267
3476	RZPDp9027I0316Q	LDHA	RZPDp9027I0316Q	-0.190513	8.78068	-1.37726	0.181811	0.783523	-4.49312
640	RZPDp9028I044Q	PPM1G	RZPDp9028I044Q	0.196209	7.46753	2.3193	0.0297025	0.669829	-3.6002
1558	RZPDp9027B0311Q	GOLGA4	RZPDp9027B0311Q	-0.190398	7.91374	-1.87878	0.0731253	0.703628	-4.05335
2129	RZPDp9027H218Q	ZNF334	RZPDp9027H218Q	-0.190309	8.64718	-1.68975	0.104711	0.736793	-4.23017
964	RZPDp9028C0217Q	AHSA2P	RZPDp9028C0217Q	0.195689	6.8686	2.13373	0.0438562	0.669829	-3.79724
3203	RZPDp9028O1621Q	DISC1	RZPDp9028O1621Q	-0.190225	8.00156	-1.43196	0.16573	0.775771	-4.44999
2229	RZPDp9027N1918Q	RPL9	RZPDp9027N1918Q	-0.190196	9.85522	-1.65791	0.111039	0.746045	-4.25873
2797	RZPDp9028G191Q	IRF2BP2	RZPDp9028G191Q	-0.190184	7.91725	-1.5169	0.143042	0.762868	-4.3805
4468	RZPDp9027K1411Q	CSNK1E	RZPDp9027K1411Q	-0.190141	9.65748	-1.20747	0.239636	0.803963	-4.6184
1740	RZPDp9028L122Q	SLC9A3R2	RZPDp9028L122Q	-0.190086	7.23001	-1.81591	0.082564	0.710797	-4.1135
1169	RZPDp9028D1721Q	GNAI2	RZPDp9028D1721Q	-0.190032	7.33686	-2.04703	0.052356	0.669905	-3.88639
2553	RZPDp9027F1614Q	RPL18A	RZPDp9027F1614Q	-0.189953	9.54352	-1.57806	0.128333	0.753661	-4.32864
4224	RZPDp9028G032Q	AEBP1	RZPDp9028G032Q	-0.189742	8.75972	-1.2477	0.22481	0.79737	-4.58992
4326	RZPDp9027H1211Q	LCMT1	RZPDp9027H1211Q	-0.189643	9.6406	-1.22912	0.231566	0.801548	-4.60316
2257	RZPDp9028K1810Q	ETFB	RZPDp9028K1810Q	-0.18941	8.06427	-1.65032	0.112594	0.746045	-4.26548
2326	RZPDp9028G027Q	PTK2B	RZPDp9028G027Q	-0.189391	7.14075	-1.63338	0.11613	0.746045	-4.28046
5587	RZPDp9027E0612Q	PIP5K1B	RZPDp9027E0612Q	-0.189025	9.08722	-1.04097	0.308809	0.828662	-4.72782
1330	RZPDp9028A1610Q	DUS1L	RZPDp9028A1610Q	-0.18896	7.07058	-1.97458	0.0605538	0.681699	-3.9593
2546	RZPDp9027F0515Q	GSN	RZPDp9027F0515Q	-0.188736	7.90266	-1.57876	0.128172	0.753661	-4.32803
3218	RZPDp9027H116Q	CCNB2	RZPDp9027H116Q	-0.18873	7.82949	-1.42814	0.166812	0.77703	-4.45304
3379	RZPDp9028B2215Q	SLC12A9	RZPDp9028B2215Q	-0.188725	8.06529	-1.39345	0.176926	0.783523	-4.48049
1866	RZPDp9028C205Q	PBXIP1	RZPDp9028C205Q	-0.188717	7.18493	-1.76994	0.0901172	0.72138	-4.15666
6765	RZPDp9027L0619Q	ACD	RZPDp9027L0619Q	-0.188706	8.38252	-0.882433	0.386756	0.857152	-4.81875
3234	RZPDp9028L134Q	MAPK8IP3	RZPDp9028L134Q	-0.18857	8.05647	-1.42249	0.168429	0.780567	-4.45755
3508	RZPDp9027D1716Q	DMAC2	RZPDp9027D1716Q	-0.188567	9.04777	-1.37168	0.183518	0.783523	-4.49744
3300	RZPDp9027A1811Q	PPIB	RZPDp9027A1811Q	-0.188514	9.67676	-1.4081	0.172597	0.783523	-4.46896
5585	RZPDp9027L066Q	EIF3K	RZPDp9027L066Q	-0.188362	8.57331	-1.04163	0.308509	0.828196	-4.72741
5255	RZPDp9027L1116Q	TAF7	RZPDp9027L1116Q	-0.188332	8.95518	-1.0895	0.287319	0.819707	-4.69735
1732	RZPDp9027K0520Q	FAM20C	RZPDp9027K0520Q	-0.188218	7.204	-1.81953	0.081994	0.708934	-4.11008
2950	RZPDp9027L178Q	ZNF22	RZPDp9027L178Q	-0.188204	8.10974	-1.48773	0.150528	0.764092	-4.4047
4721	RZPDp9028A0314Q	ADPRM	RZPDp9028A0314Q	-0.18807	7.21011	-1.1661	0.255633	0.809527	-4.64686
3073	RZPDp9027G1816Q	SNX17	RZPDp9027G1816Q	-0.187967	9.05222	-1.45945	0.158089	0.77076	-4.42783
2863	RZPDp9028N0818Q	RPS10	RZPDp9028N0818Q	-0.187953	7.64411	-1.50447	0.146193	0.762868	-4.39085
2952	RZPDp9028G0415Q	MPI	RZPDp9028G0415Q	-0.187935	7.17003	-1.48753	0.15058	0.764092	-4.40487
3470	RZPDp9028K1419Q	RAPGEF6	RZPDp9028K1419Q	-0.187865	6.74926	-1.37781	0.181643	0.783523	-4.49269
2683	RZPDp9028P2013Q	CERS2	RZPDp9028P2013Q	-0.187731	7.16881	-1.54786	0.135433	0.756774	-4.35444
4953	RZPDp9028C0815Q	DDX24	RZPDp9028C0815Q	-0.187669	7.55369	-1.13503	0.26816	0.81161	-4.6677
3172	RZPDp9027B2018Q	ENO1	RZPDp9027B2018Q	-0.187625	8.73093	-1.43702	0.164302	0.775771	-4.44594
2621	RZPDp9028D1720Q	LSM2	RZPDp9028D1720Q	-0.187579	7.3097	-1.55948	0.132662	0.75511	-4.34455
2758	RZPDp9027D0817Q	CIC	RZPDp9027D0817Q	-0.187573	8.48479	-1.52664	0.14061	0.762868	-4.37234
4502	RZPDp9027G0817Q	SEMA5B	RZPDp9027G0817Q	-0.187535	8.75083	-1.20055	0.242255	0.806698	-4.62321
4725	RZPDp9028H1314Q	TBC1D17	RZPDp9028H1314Q	-0.187447	7.54871	-1.16573	0.25578	0.809527	-4.64712
734	RZPDp9027F087Q	KIAA1191	RZPDp9027F087Q	0.195489	8.35226	2.26454	0.0333696	0.669829	-3.65916
3479	RZPDp9027C1518Q	UBA5	RZPDp9027C1518Q	-0.187353	8.56814	-1.37698	0.181896	0.783523	-4.49333
709	RZPDp9027P153Q	ERRFI1	RZPDp9027P153Q	0.195146	7.62902	2.28093	0.0322309	0.669829	-3.64158
1729	RZPDp9027G158Q	MCM7	RZPDp9027G158Q	-0.187099	8.01555	-1.82037	0.0818625	0.708934	-4.10929
2932	RZPDp9027B2416Q	MAPRE3	RZPDp9027B2416Q	-0.18699	9.61383	-1.49199	0.149416	0.763645	-4.40119
3078	RZPDp9027L2419Q	NTN4	RZPDp9027L2419Q	-0.186918	8.05794	-1.45892	0.158234	0.77076	-4.42826
6506	RZPDp9027D0812Q	COMMD10	RZPDp9027D0812Q	-0.186868	9.83758	-0.916501	0.369002	0.849906	-4.80034
5792	RZPDp9027A1411Q	PRPSAP1	RZPDp9027A1411Q	-0.186833	8.92939	-1.01161	0.322344	0.833446	-4.74566
5641	RZPDp9027K0711Q	RPLP0	RZPDp9027K0711Q	-0.186827	9.9815	-1.03342	0.312249	0.829839	-4.73245
4323	RZPDp9027G0215Q	CHMP1A	RZPDp9027G0215Q	-0.186803	9.39264	-1.22956	0.231405	0.801548	-4.60285
1267	RZPDp9027P178Q	INO80E	RZPDp9027P178Q	-0.186779	9.8579	-2.00097	0.0574452	0.679423	-3.93292
5349	RZPDp9027I0113Q	OFD1	RZPDp9027I0113Q	-0.186762	9.17042	-1.07632	0.293049	0.820901	-4.70575
3285	RZPDp9027E0814Q	ELMO1	RZPDp9027E0814Q	-0.186703	10.1258	-1.41113	0.171712	0.783523	-4.46656
5234	RZPDp9028I1610Q	PPP2R1A	RZPDp9028I1610Q	-0.186697	7.38301	-1.09184	0.286311	0.819564	-4.69586
2298	RZPDp9027F149Q	MARS1	RZPDp9027F149Q	-0.186681	8.44523	-1.64058	0.114617	0.746045	-4.27411
3886	RZPDp9027P206Q	CMIP	RZPDp9027P206Q	-0.186655	9.66732	-1.30808	0.203886	0.784642	-4.54576
4952	RZPDp9027A0216Q	POLR2G	RZPDp9027A0216Q	-0.186651	9.57248	-1.13504	0.268158	0.81161	-4.66769
2529	RZPDp9028G1520Q	DENND4B	RZPDp9028G1520Q	-0.186591	8.33557	-1.583	0.127203	0.753307	-4.32439
1341	RZPDp9027N1013Q	GAPDH	RZPDp9027N1013Q	-0.186564	8.50629	-1.96657	0.0615275	0.686029	-3.96728
2217	RZPDp9027D087Q	FMNL2	RZPDp9027D087Q	-0.186514	8.10831	-1.6626	0.110087	0.74449	-4.25454
5982	RZPDp9027A0818Q	CLIC1	RZPDp9027A0818Q	-0.186509	9.13132	-0.986857	0.334075	0.837311	-4.76035
2387	RZPDp9028B222Q	GON4L	RZPDp9028B222Q	-0.186442	7.66516	-1.62004	0.11898	0.747006	-4.29218
2231	RZPDp9028E2115Q	FCHSD1	RZPDp9028E2115Q	-0.186296	7.54654	-1.65748	0.111126	0.746045	-4.2591
1155	RZPDp9027G1119Q	TBRG4	RZPDp9027G1119Q	-0.186183	7.69636	-2.05101	0.0519354	0.669905	-3.88234
3482	RZPDp9027C2413Q	SAE1	RZPDp9027C2413Q	-0.186052	8.99429	-1.37607	0.182173	0.783523	-4.49404
2050	RZPDp9028H2020Q	NAP1L1	RZPDp9028H2020Q	-0.186031	7.12574	-1.71202	0.100469	0.733779	-4.20999
2616	RZPDp9027O1814Q	UBE4A	RZPDp9027O1814Q	-0.185953	10.1303	-1.56098	0.132308	0.75511	-4.34327
4885	RZPDp9028O1614Q	PLEKHM1	RZPDp9028O1614Q	-0.18591	9.25472	-1.1445	0.264293	0.810903	-4.66139
2024	RZPDp9027D1017Q	TUT1	RZPDp9027D1017Q	-0.185574	8.73786	-1.71986	0.0990115	0.73305	-4.20284
1395	RZPDp9027M0818Q	MRPS11	RZPDp9027M0818Q	-0.185558	7.93427	-1.93686	0.0652562	0.700528	-3.99667
2094	RZPDp9028O0617Q	HSH2D	RZPDp9028O0617Q	-0.185496	7.01321	-1.69882	0.102965	0.736618	-4.22197
401	RZPDp9027N097Q	VIM	RZPDp9027N097Q	0.194504	8.46202	2.54592	0.0181338	0.668556	-3.34998
3526	RZPDp9027E116Q	RP9	RZPDp9027E116Q	-0.185485	9.01411	-1.36806	0.184632	0.784343	-4.50024
2145	RZPDp9028K243Q	EPS8L2	RZPDp9028K243Q	-0.185474	8.76232	-1.68327	0.105974	0.740111	-4.23602
3642	RZPDp9028O084Q	AAMP	RZPDp9028O084Q	-0.18547	7.67886	-1.34848	0.190755	0.784382	-4.51528
1818	RZPDp9027J2316Q	ARL8A	RZPDp9027J2316Q	-0.18547	8.8138	-1.78484	0.0876061	0.72138	-4.14275
1618	RZPDp9027O1010Q	BRD3	RZPDp9027O1010Q	-0.185465	9.8693	-1.85653	0.0763522	0.703841	-4.07479
1135	RZPDp9027E139Q	UBA52	RZPDp9027E139Q	-0.185403	7.58624	-2.06072	0.0509224	0.669905	-3.87244
2139	RZPDp9027M096Q	CTDP1	RZPDp9027M096Q	-0.185391	8.58391	-1.68682	0.10528	0.737876	-4.23282
2362	RZPDp9028L207Q	MED4	RZPDp9028L207Q	-0.185357	7.36503	-1.62491	0.117934	0.747006	-4.28792
1980	RZPDp9028O1912Q	CRNKL1	RZPDp9028O1912Q	-0.185214	7.45073	-1.73452	0.0963329	0.728206	-4.18941
2607	RZPDp9027I2213Q	ALKBH2	RZPDp9027I2213Q	-0.185198	8.78972	-1.56262	0.131923	0.75511	-4.34187
3329	RZPDp9027L1911Q	BCAM	RZPDp9027L1911Q	-0.185181	9.88772	-1.40092	0.174709	0.783523	-4.47462
2673	RZPDp9027D1918Q	ARL16	RZPDp9027D1918Q	-0.185158	7.69405	-1.55104	0.134669	0.755366	-4.35173
2706	RZPDp9028J1817Q	PWP2	RZPDp9028J1817Q	-0.185071	6.96239	-1.54203	0.13684	0.757747	-4.35938
2714	RZPDp9028C0216Q	NBPF26	RZPDp9028C0216Q	-0.185021	7.02469	-1.54026	0.137269	0.757747	-4.36087
4039	RZPDp9027P245Q	GAA	RZPDp9027P245Q	-0.185006	8.38545	-1.28264	0.212512	0.788856	-4.56457
2280	RZPDp9028D027Q	DRAP1	RZPDp9028D027Q	-0.184982	7.18955	-1.64517	0.113659	0.746045	-4.27004
3398	RZPDp9028M1010Q	SPOCK2	RZPDp9028M1010Q	-0.184974	8.32987	-1.38991	0.177985	0.783523	-4.48326
462	RZPDp9028P0119Q	RPL10	RZPDp9028P0119Q	0.194401	6.76919	2.48308	0.0208303	0.668556	-3.42029
2243	RZPDp9028F2220Q	ZNF598	RZPDp9028F2220Q	-0.184768	6.73464	-1.65398	0.111842	0.746045	-4.26223
2608	RZPDp9028D0312Q	ARFIP2	RZPDp9028D0312Q	-0.184732	7.10217	-1.56201	0.132067	0.75511	-4.34239
1129	RZPDp9028D165Q	MACF1	RZPDp9028D165Q	-0.184718	7.24598	-2.06446	0.0505376	0.669829	-3.86863
2158	RZPDp9027P0911Q	AGAP4	RZPDp9027P0911Q	-0.18467	9.15475	-1.67936	0.106742	0.741608	-4.23954
3213	RZPDp9028L161Q	IGFBP6	RZPDp9028L161Q	-0.184658	7.73505	-1.42904	0.166556	0.776928	-4.45232
7074	RZPDp9027I211Q	GRK6	RZPDp9027I211Q	-0.184623	8.81689	-0.841077	0.409044	0.866878	-4.84024
3647	RZPDp9027D1013Q	NBPF9	RZPDp9027D1013Q	-0.184599	9.77723	-1.34788	0.190943	0.784382	-4.51573
4249	RZPDp9027P098Q	C3orf62	RZPDp9027P098Q	-0.184573	9.24436	-1.24342	0.226351	0.798703	-4.59298
3378	RZPDp9028K2213Q	ATP5F1B	RZPDp9028K2213Q	-0.184561	6.88091	-1.39385	0.176806	0.783523	-4.48017
5290	RZPDp9027J1312Q	MLH1	RZPDp9027J1312Q	-0.18449	8.76583	-1.08423	0.289599	0.820712	-4.70072
3227	RZPDp9027C0114Q	PJA1	RZPDp9027C0114Q	-0.184383	9.17973	-1.42526	0.167636	0.778854	-4.45534
2152	RZPDp9028N0214Q	HSPE1-MOB4	RZPDp9028N0214Q	-0.184374	7.05229	-1.68196	0.106231	0.740111	-4.2372
5625	RZPDp9027E0714Q	EIF4G3	RZPDp9027E0714Q	-0.184197	10.0489	-1.03598	0.311081	0.828783	-4.73088
1197	RZPDp9028K2112Q	CCR7	RZPDp9028K2112Q	-0.184074	7.25756	-2.03504	0.0536404	0.671872	-3.89856
4115	RZPDp9027I2318Q	FXYD6	RZPDp9027I2318Q	-0.184059	8.82487	-1.26832	0.217487	0.792415	-4.57503
1839	RZPDp9028K228Q	RNF19A	RZPDp9028K228Q	-0.184	7.58184	-1.7786	0.08865	0.72138	-4.14858
2747	RZPDp9027C1611Q	WDR13	RZPDp9027C1611Q	-0.183998	9.00363	-1.53072	0.139602	0.761943	-4.36891
5657	RZPDp9027A1719Q	RPL23A	RZPDp9027A1719Q	-0.183967	8.22303	-1.03078	0.313461	0.830197	-4.73406
3041	RZPDp9027P1616Q	KYAT3	RZPDp9027P1616Q	-0.183934	8.09156	-1.46839	0.155666	0.767246	-4.42056
1657	RZPDp9028P201Q	MAF1	RZPDp9028P201Q	-0.183821	8.51494	-1.84357	0.0782884	0.703841	-4.0872
5728	RZPDp9027E1513Q	SMURF2	RZPDp9027E1513Q	-0.183758	9.76944	-1.02041	0.318245	0.832968	-4.74036
3059	RZPDp9027H1010Q	PTBP1	RZPDp9027H1010Q	-0.183733	8.7591	-1.46352	0.156981	0.769408	-4.42452
1666	RZPDp9028D2116Q	RIPK1	RZPDp9028D2116Q	-0.183624	7.23617	-1.84175	0.078564	0.703841	-4.08894
2535	RZPDp9028G211Q	USP42	RZPDp9028G211Q	-0.183614	7.18106	-1.58179	0.127477	0.753307	-4.32542
4677	RZPDp9027A2010Q	SF3B2	RZPDp9027A2010Q	-0.183603	8.87219	-1.17142	0.253532	0.809527	-4.64325
796	RZPDp9028M2311Q	CFDP1	RZPDp9028M2311Q	0.194197	7.23537	2.22637	0.0361655	0.669829	-3.69987
4475	RZPDp9027K1412Q	DENND5A	RZPDp9027K1412Q	-0.183435	9.42663	-1.20612	0.240145	0.804408	-4.61934
775	RZPDp9028C2310Q	EEF2	RZPDp9028C2310Q	0.192776	7.15297	2.23978	0.03516	0.669829	-3.6856
3324	RZPDp9027A0112Q	ACTG1	RZPDp9027A0112Q	-0.183331	8.22005	-1.40229	0.174303	0.783523	-4.47354
3515	RZPDp9027H1818Q	SRSF2	RZPDp9027H1818Q	-0.183288	8.68027	-1.37074	0.183805	0.783523	-4.49816
2689	RZPDp9027N2118Q	GGA1	RZPDp9027N2118Q	-0.183246	8.29633	-1.54611	0.135853	0.757265	-4.35592
2473	RZPDp9027D081Q	DAG1	RZPDp9027D081Q	-0.183201	6.72796	-1.59597	0.12427	0.752632	-4.31317
2638	RZPDp9027G1012Q	ATPAF1	RZPDp9027G1012Q	-0.183181	8.8801	-1.55735	0.133167	0.75511	-4.34637
1775	RZPDp9027K082Q	KMT2C	RZPDp9027K082Q	-0.183133	9.81387	-1.80099	0.0849534	0.716538	-4.12759
2255	RZPDp9028O2118Q	ACTN1	RZPDp9028O2118Q	-0.18306	7.55011	-1.65071	0.112514	0.746045	-4.26513
3680	RZPDp9027O116Q	GBAP1	RZPDp9027O116Q	-0.18299	8.94962	-1.3415	0.192974	0.784382	-4.52059
1195	RZPDp9027G0619Q	GTF2IRD2B	RZPDp9027G0619Q	-0.182954	8.41774	-2.0364	0.0534931	0.671114	-3.89718
5212	RZPDp9028P1514Q	MAP7D3	RZPDp9028P1514Q	-0.182939	7.14343	-1.09488	0.285005	0.819564	-4.6939
3722	RZPDp9028G053Q	GRAMD1A	RZPDp9028G053Q	-0.182931	7.07112	-1.33496	0.195072	0.784382	-4.52556
3311	RZPDp9028D1510Q	PFKL	RZPDp9028D1510Q	-0.182908	8.04696	-1.40587	0.173251	0.783523	-4.47072
2469	RZPDp9028M1012Q	MICAL3	RZPDp9028M1012Q	-0.182903	7.10936	-1.59666	0.124117	0.752632	-4.31257
4260	RZPDp9027O1911Q	LRPAP1	RZPDp9027O1911Q	-0.182855	9.47615	-1.24127	0.227131	0.799313	-4.59452
4428	RZPDp9028C2418Q	MDN1	RZPDp9028C2418Q	-0.182838	7.08448	-1.21322	0.237473	0.802976	-4.61437
1190	RZPDp9027G1814Q	ODF2	RZPDp9027G1814Q	-0.182823	9.8934	-2.03835	0.0532824	0.670849	-3.8952
941	RZPDp9027D0218Q	MICAL1	RZPDp9027D0218Q	0.192155	7.61138	2.14437	0.0429036	0.669829	-3.78616
5422	RZPDp9028E029Q	ARF5	RZPDp9028E029Q	-0.182781	7.81427	-1.06618	0.297508	0.822213	-4.71214
1953	RZPDp9027N229Q	CDK4	RZPDp9027N229Q	-0.182775	8.1261	-1.74284	0.0948409	0.727283	-4.18176
2956	RZPDp9027A1416Q	QARS1	RZPDp9027A1416Q	-0.182767	8.57602	-1.48675	0.150785	0.764092	-4.40551
4094	RZPDp9027G0511Q	HBB	RZPDp9027G0511Q	-0.182693	8.82236	-1.27145	0.216391	0.792353	-4.57275
858	RZPDp9028H052Q	SNX4	RZPDp9028H052Q	0.19214	7.8029	2.1916	0.0388955	0.669829	-3.73665
3125	RZPDp9027M0813Q	PCDHGA2	RZPDp9027M0813Q	-0.182543	8.30672	-1.44624	0.161724	0.775194	-4.43852
5502	RZPDp9028E0913Q	PEPD	RZPDp9028E0913Q	-0.182508	7.01743	-1.05474	0.302598	0.82428	-4.7193
1400	RZPDp9027L0119Q	BOC	RZPDp9027L0119Q	-0.182483	7.54852	-1.93416	0.065605	0.701198	-3.99933
3929	RZPDp9027F0614Q	PCIF1	RZPDp9027F0614Q	-0.182458	9.95947	-1.30216	0.205871	0.784642	-4.55017
1009	RZPDp9028N225Q	FN1	RZPDp9028N225Q	0.190916	7.82345	2.10881	0.0461617	0.669829	-3.82306
2559	RZPDp9027P099Q	CAPZA1	RZPDp9027P099Q	-0.182392	8.49853	-1.57517	0.128998	0.754853	-4.33112
2480	RZPDp9027M013Q	MAP7D1	RZPDp9027M013Q	-0.182379	7.88028	-1.5946	0.124577	0.752632	-4.31435
539	RZPDp9027O023Q	PTN	RZPDp9027O023Q	0.190569	8.53476	2.41093	0.0243838	0.669829	-3.50018
2642	RZPDp9027G133Q	EDEM2	RZPDp9027G133Q	-0.182358	7.65934	-1.55686	0.133283	0.75511	-4.34678
4749	RZPDp9027I0110Q	HNRNPK	RZPDp9027I0110Q	-0.182332	7.63236	-1.163	0.256861	0.809527	-4.64896
2170	RZPDp9027O1719Q	H19	RZPDp9027O1719Q	-0.182248	8.39657	-1.67443	0.107716	0.742875	-4.24396
1381	RZPDp9028L2417Q	NCK2	RZPDp9028L2417Q	-0.182224	6.80895	-1.94709	0.0639505	0.694228	-3.98658
3235	RZPDp9027A2317Q	LRRC4B	RZPDp9027A2317Q	-0.182222	8.03244	-1.42239	0.168458	0.780567	-4.45763
738	RZPDp9027J224Q	SLC25A6	RZPDp9027J224Q	0.190094	9.64468	2.26215	0.033539	0.669829	-3.66172
3142	RZPDp9027G1017Q	VPS13B	RZPDp9027G1017Q	-0.182091	8.94466	-1.44336	0.162525	0.775499	-4.44084
3819	RZPDp9027K0318Q	GNAS	RZPDp9027K0318Q	-0.182018	8.28108	-1.32031	0.199839	0.784382	-4.53661
1353	RZPDp9027N166Q	SF3B3	RZPDp9027N166Q	-0.181979	8.07945	-1.96192	0.0620978	0.688125	-3.97189
831	RZPDp9027M243Q	AAR2	RZPDp9027M243Q	0.189734	7.82684	2.20785	0.037597	0.669829	-3.71949
2654	RZPDp9028O2316Q	WDR83	RZPDp9028O2316Q	-0.181836	7.15588	-1.5544	0.133867	0.755366	-4.34888
3171	RZPDp9027J1117Q	GSTO1	RZPDp9027J1117Q	-0.181783	7.8394	-1.43715	0.164263	0.775771	-4.44583
3196	RZPDp9027E1910Q	USP6NL	RZPDp9027E1910Q	-0.181728	8.1762	-1.43293	0.165453	0.775771	-4.44921
2189	RZPDp9027O136Q	PGK1	RZPDp9027O136Q	-0.181683	7.8901	-1.66917	0.108766	0.744134	-4.24868
2471	RZPDp9028O213Q	TSPYL2	RZPDp9028O213Q	-0.181639	7.48591	-1.59602	0.124261	0.752632	-4.31313
1439	RZPDp9028K0210Q	LTA4H	RZPDp9028K0210Q	-0.181597	7.34634	-1.91896	0.0675993	0.701198	-4.01426
4810	RZPDp9027M0112Q	MAPRE1	RZPDp9027M0112Q	-0.181579	8.50736	-1.15473	0.260165	0.809527	-4.65454
2000	RZPDp9028J102Q	ZNF394	RZPDp9028J102Q	-0.181551	7.34567	-1.72826	0.0974691	0.730179	-4.19515
2815	RZPDp9028J2212Q	SINHCAF	RZPDp9028J2212Q	-0.181395	7.47652	-1.5143	0.143698	0.762868	-4.38268
1559	RZPDp9028G1317Q	POLDIP2	RZPDp9028G1317Q	-0.18137	7.67061	-1.87851	0.0731646	0.703628	-4.05362
5197	RZPDp9027I1711Q	KIF2C	RZPDp9027I1711Q	-0.181357	9.71326	-1.09679	0.284187	0.819564	-4.69268
2082	RZPDp9028O1820Q	DDX11	RZPDp9028O1820Q	-0.181319	6.93476	-1.70142	0.102471	0.736618	-4.21962
2421	RZPDp9027C1111Q	TPM1	RZPDp9027C1111Q	-0.181307	7.95636	-1.61008	0.121147	0.749902	-4.3009
6679	RZPDp9027N067Q	A2M	RZPDp9027N067Q	-0.181227	8.55202	-0.893267	0.381051	0.854863	-4.81296
4051	RZPDp9028G0914Q	RPL12	RZPDp9028G0914Q	-0.181166	9.1777	-1.28025	0.213337	0.789139	-4.56633
1541	RZPDp9027H1213Q	VARS2	RZPDp9027H1213Q	-0.181082	8.65166	-1.88365	0.0724348	0.702767	-4.04864
1620	RZPDp9027H2218Q	ICAM3	RZPDp9027H2218Q	-0.18104	8.24568	-1.8561	0.0764159	0.703841	-4.0752
4157	RZPDp9027D1010Q	WASHC2C	RZPDp9027D1010Q	-0.180969	8.74451	-1.26038	0.220287	0.794319	-4.58079
2007	RZPDp9028A052Q	CYTH2	RZPDp9028A052Q	-0.180886	7.2759	-1.72631	0.0978252	0.730526	-4.19694
3717	RZPDp9028H2013Q	CCT4	RZPDp9028H2013Q	-0.180874	7.65111	-1.33577	0.194814	0.784382	-4.52495
2372	RZPDp9027O138Q	CAMKV	RZPDp9027O138Q	-0.180766	8.5616	-1.62281	0.118383	0.747006	-4.28976
3585	RZPDp9027K189Q	AAMP	RZPDp9027K189Q	-0.180744	8.57401	-1.35665	0.188179	0.784382	-4.50902
2368	RZPDp9028L2217Q	SIVA1	RZPDp9028L2217Q	-0.18053	7.3966	-1.62307	0.118329	0.747006	-4.28953
4237	RZPDp9027F186Q	CCDC28B	RZPDp9027F186Q	-0.180485	11.1218	-1.24513	0.225737	0.798362	-4.59176
4633	RZPDp9028K2416Q	PUF60	RZPDp9028K2416Q	-0.180357	7.07822	-1.17698	0.25135	0.809527	-4.63946
1630	RZPDp9028O1813Q	SEPTIN2	RZPDp9028O1813Q	-0.18032	7.26148	-1.85141	0.0771132	0.703841	-4.0797
5342	RZPDp9027N1114Q	SRR	RZPDp9027N1114Q	-0.18025	9.33068	-1.0774	0.292575	0.820901	-4.70506
4805	RZPDp9027J0710Q	AACS	RZPDp9027J0710Q	-0.180085	8.93621	-1.15564	0.2598	0.809527	-4.65393
1520	RZPDp9028D124Q	GYS1	RZPDp9028D124Q	-0.18003	7.92442	-1.88999	0.0715454	0.702767	-4.0425
2698	RZPDp9027P0910Q	VPS26B	RZPDp9027P0910Q	-0.179853	9.08803	-1.5442	0.136314	0.757507	-4.35754
1680	RZPDp9028P2016Q	BRPF1	RZPDp9028P2016Q	-0.179847	7.2852	-1.83821	0.0791029	0.703841	-4.09232
5396	RZPDp9028N2015Q	TADA2B	RZPDp9028N2015Q	-0.179831	8.6838	-1.06961	0.295992	0.822138	-4.70998
2426	RZPDp9028C1218Q	CHMP3	RZPDp9028C1218Q	-0.179781	6.97302	-1.60842	0.121509	0.750759	-4.30234
3357	RZPDp9027G1712Q	PWWP2A	RZPDp9027G1712Q	-0.179742	9.17326	-1.39702	0.175865	0.783523	-4.47769
3937	RZPDp9027D089Q	TTYH3	RZPDp9027D089Q	-0.179719	9.00952	-1.30086	0.206307	0.784642	-4.55113
5926	RZPDp9027M1720Q	ZNF827	RZPDp9027M1720Q	-0.179715	7.2523	-0.994007	0.330657	0.83622	-4.75614
2655	RZPDp9027E1920Q	TUBB3	RZPDp9027E1920Q	-0.179697	7.60908	-1.55417	0.133923	0.755366	-4.34908
3084	RZPDp9027K2019Q	CSRP2	RZPDp9027K2019Q	-0.179693	8.10271	-1.45586	0.15907	0.773165	-4.43074
4344	RZPDp9027C1613Q	EIF2S3	RZPDp9027C1613Q	-0.179687	9.32857	-1.22697	0.232358	0.801548	-4.60469
314	RZPDp9027E037Q	AHSG	RZPDp9027E037Q	0.189548	7.58892	2.64344	0.0145869	0.668556	-3.23968
3299	RZPDp9028G071Q	PTPRF	RZPDp9028G071Q	-0.179614	8.39771	-1.40812	0.172593	0.783523	-4.46895
747	RZPDp9027H112Q	MLF2	RZPDp9027H112Q	0.189294	8.94954	2.26007	0.033687	0.669829	-3.66395
2383	RZPDp9027G049Q	SNHG29	RZPDp9027G049Q	-0.179575	8.20058	-1.62047	0.118888	0.747006	-4.29181
6054	RZPDp9027D1617Q	UFC1	RZPDp9027D1617Q	-0.179501	8.70176	-0.976168	0.33923	0.840044	-4.76659
2883	RZPDp9028O088Q	FAM98A	RZPDp9028O088Q	-0.179414	7.64493	-1.50209	0.146805	0.762868	-4.39283
3965	RZPDp9027H208Q	AARS1	RZPDp9027H208Q	-0.179292	8.76288	-1.29697	0.207618	0.784935	-4.55401
3829	RZPDp9027F1412Q	MRPS2	RZPDp9027F1412Q	-0.179291	9.1166	-1.31798	0.200606	0.784545	-4.53836
6583	RZPDp9028N011Q	POLR2A	RZPDp9028N011Q	-0.179128	7.96779	-0.908009	0.373376	0.850376	-4.80499
5498	RZPDp9027A0417Q	RAB40C	RZPDp9027A0417Q	-0.17908	8.57563	-1.05529	0.302353	0.82428	-4.71896
5696	RZPDp9028G0721Q	TASOR	RZPDp9028G0721Q	-0.179012	8.16188	-1.02557	0.315857	0.831223	-4.73723
1822	RZPDp9028C112Q	TPPP3	RZPDp9028C112Q	-0.178971	7.71857	-1.78326	0.0878699	0.72138	-4.14423
2444	RZPDp9027I2417Q	SLC25A14	RZPDp9027I2417Q	-0.178945	8.40069	-1.60207	0.122911	0.752557	-4.30787
3085	RZPDp9027P097Q	MVB12A	RZPDp9027P097Q	-0.178906	8.22923	-1.45566	0.159124	0.773165	-4.4309
4822	RZPDp9027L169Q	GRK2	RZPDp9027L169Q	-0.178884	8.54565	-1.15387	0.260513	0.809527	-4.65512
4779	RZPDp9027A0514Q	EFL1	RZPDp9027A0514Q	-0.178785	9.97887	-1.15909	0.25842	0.809527	-4.6516
1778	RZPDp9027G1113Q	MSTO1	RZPDp9027G1113Q	-0.178773	9.12294	-1.80021	0.0850792	0.716538	-4.12832
4835	RZPDp9028O0710Q	CYFIP2	RZPDp9028O0710Q	-0.178727	8.66748	-1.15231	0.261137	0.809537	-4.65617
4623	RZPDp9027D0610Q	PCDH7	RZPDp9027D0610Q	-0.178687	9.49312	-1.17881	0.250635	0.809527	-4.6382
1529	RZPDp9027P239Q	U2SURP	RZPDp9027P239Q	-0.178656	9.31571	-1.88644	0.0720423	0.702767	-4.04594
2959	RZPDp9027G239Q	USP22	RZPDp9027G239Q	-0.17862	8.37327	-1.48605	0.150971	0.764092	-4.40609
3729	RZPDp9027K0516Q	L1CAM	RZPDp9027K0516Q	-0.178618	9.3106	-1.33388	0.195421	0.784382	-4.52638
1250	RZPDp9028G0217Q	NME1	RZPDp9028G0217Q	-0.178554	6.9109	-2.00853	0.0565809	0.678323	-3.92533
5025	RZPDp9028D2217Q	COMMD7	RZPDp9028D2217Q	-0.178408	7.30615	-1.12193	0.273576	0.816002	-4.67634
1108	RZPDp9028A164Q	SHKBP1	RZPDp9028A164Q	0.189112	7.3585	2.07203	0.0497653	0.669829	-3.86089
2206	RZPDp9027L1715Q	CFL1	RZPDp9027L1715Q	-0.178357	8.1746	-1.66518	0.109566	0.744134	-4.25224
5155	RZPDp9027E0213Q	TLE5	RZPDp9027E0213Q	-0.178269	8.85149	-1.10258	0.281716	0.819352	-4.68894
1944	RZPDp9028L063Q	LAD1	RZPDp9028L063Q	-0.178263	7.0647	-1.74604	0.0942732	0.726798	-4.17881
3475	RZPDp9027G2417Q	PLPP1	RZPDp9027G2417Q	-0.178193	8.58033	-1.37733	0.181788	0.783523	-4.49306
5423	RZPDp9027H1916Q	RUSC2	RZPDp9027H1916Q	-0.17814	10.2189	-1.06596	0.297607	0.822213	-4.71228
3896	RZPDp9027A2316Q	PMS2	RZPDp9027A2316Q	-0.178078	8.94886	-1.30617	0.204527	0.784642	-4.54718
3087	RZPDp9027B015Q	PKM	RZPDp9027B015Q	-0.178041	7.11426	-1.45533	0.159217	0.773165	-4.43118
4561	RZPDp9027L2311Q	TMEM59L	RZPDp9027L2311Q	-0.178016	9.90221	-1.19047	0.246113	0.808842	-4.63019
1911	RZPDp9028D0515Q	UBALD2	RZPDp9028D0515Q	-0.177954	6.96807	-1.75846	0.0920931	0.72138	-4.16732
2331	RZPDp9027A1717Q	SETD4	RZPDp9027A1717Q	-0.17791	7.32468	-1.6331	0.11619	0.746045	-4.28071
2628	RZPDp9027A0712Q	LTBP3	RZPDp9027A0712Q	-0.17785	8.36579	-1.55858	0.132877	0.75511	-4.34532
6657	RZPDp9027I1313Q	CSPG5	RZPDp9027I1313Q	-0.177829	8.55343	-0.895906	0.379669	0.854863	-4.81154
1977	RZPDp9027I238Q	FHL1	RZPDp9027I238Q	-0.177803	8.55869	-1.73536	0.0961818	0.728206	-4.18864
3936	RZPDp9027P236Q	DGCR8	RZPDp9027P236Q	-0.177771	9.85732	-1.30113	0.206217	0.784642	-4.55093
5708	RZPDp9027L1615Q	KLHL22	RZPDp9027L1615Q	-0.17769	8.09678	-1.02341	0.316856	0.832275	-4.73854
3779	RZPDp9027N1513Q	NIPSNAP2	RZPDp9027N1513Q	-0.177663	8.97345	-1.32644	0.197835	0.784382	-4.532
2030	RZPDp9027O026Q	ZYX	RZPDp9027O026Q	-0.177558	8.69255	-1.71823	0.099313	0.733147	-4.20433
2133	RZPDp9027C228Q	TECPR1	RZPDp9027C228Q	-0.177548	8.94912	-1.68919	0.104821	0.736793	-4.23069
1955	RZPDp9027I2212Q	CAPZA2	RZPDp9027I2212Q	-0.177504	9.26621	-1.74256	0.0948915	0.727283	-4.18202
3750	RZPDp9028I068Q	RAC2	RZPDp9028I068Q	-0.177447	7.23516	-1.33067	0.196458	0.784382	-4.5288
8452	RZPDp9027J1610Q	NASP	RZPDp9027J1610Q	-0.177436	8.37876	-0.67544	0.506193	0.897688	-4.91672
3098	RZPDp9028P1917Q	TSHZ1	RZPDp9028P1917Q	-0.177427	6.96109	-1.45202	0.160126	0.774652	-4.43385
2492	RZPDp9028A0617Q	TLE5	RZPDp9028A0617Q	-0.177404	7.16877	-1.59168	0.125233	0.752861	-4.31688
4975	RZPDp9028E015Q	PPP6R2	RZPDp9028E015Q	-0.177361	7.94727	-1.13116	0.269752	0.812929	-4.67026
2319	RZPDp9028C1116Q	SNU13	RZPDp9028C1116Q	-0.177246	7.31952	-1.63546	0.115692	0.746045	-4.27863
1256	RZPDp9028K0610Q	PGAP6	RZPDp9028K0610Q	-0.177153	7.25772	-2.0043	0.0570629	0.679423	-3.92958
2435	RZPDp9027L126Q	MAPK7	RZPDp9027L126Q	-0.177127	11.2844	-1.60489	0.122288	0.752557	-4.30542
5816	RZPDp9028K131Q	RPS2	RZPDp9028K131Q	-0.17701	8.79454	-1.00899	0.323571	0.833446	-4.74723
955	RZPDp9028A185Q	ATP6AP2	RZPDp9028A185Q	0.188316	7.59212	2.13917	0.043366	0.669829	-3.79157
3478	RZPDp9027P106Q	DNAJA1	RZPDp9027P106Q	-0.176915	11.1873	-1.37706	0.181871	0.783523	-4.49327
3641	RZPDp9027L222Q	UPF1	RZPDp9027L222Q	-0.176894	8.04876	-1.34892	0.190613	0.784382	-4.51494
2794	RZPDp9027D1315Q	SOCS5	RZPDp9027D1315Q	-0.17689	9.49882	-1.51772	0.142836	0.762868	-4.37982
5035	RZPDp9027I1013Q	HMGXB3	RZPDp9027I1013Q	-0.17684	9.25883	-1.12044	0.274197	0.816035	-4.67732
3097	RZPDp9028D1215Q	ZYG11B	RZPDp9028D1215Q	-0.176807	7.90444	-1.45242	0.160015	0.774652	-4.43353
4631	RZPDp9027M1114Q	RPL4	RZPDp9027M1114Q	-0.176698	10.0448	-1.1772	0.251264	0.809527	-4.63931
3105	RZPDp9028O2020Q	CSGALNACT1	RZPDp9028O2020Q	-0.176657	7.51925	-1.45068	0.160496	0.77498	-4.43494
2912	RZPDp9027J0914Q	XYLT2	RZPDp9027J0914Q	-0.176656	9.39047	-1.49604	0.148365	0.763427	-4.39785
3839	RZPDp9027P0413Q	TNPO3	RZPDp9027P0413Q	-0.176543	7.79916	-1.31701	0.200924	0.784545	-4.53908
2162	RZPDp9027C0120Q	PKD5	RZPDp9027C0120Q	-0.176374	7.02886	-1.67711	0.107186	0.742875	-4.24156
3477	RZPDp9028G242Q	PCMT1	RZPDp9028G242Q	-0.176357	7.63092	-1.37719	0.181832	0.783523	-4.49317
2173	RZPDp9028H0815Q	KMT2C	RZPDp9028H0815Q	-0.176284	7.26569	-1.67401	0.1078	0.742875	-4.24434
2869	RZPDp9027M188Q	ACIN1	RZPDp9027M188Q	-0.1762	8.19103	-1.50378	0.146372	0.762868	-4.39144
2700	RZPDp9027L1810Q	CBR1	RZPDp9027L1810Q	-0.176029	9.08889	-1.54352	0.136478	0.757747	-4.35811
2739	RZPDp9028M0618Q	CREM	RZPDp9028M0618Q	-0.175939	6.8875	-1.53289	0.139069	0.760992	-4.36709
6461	RZPDp9027C1513Q	AAAS	RZPDp9027C1513Q	-0.175862	9.43691	-0.922059	0.366157	0.849516	-4.79728
4784	RZPDp9027J189Q	HID1	RZPDp9027J189Q	-0.175829	8.8535	-1.15802	0.258849	0.809527	-4.65233
2991	RZPDp9027G0319Q	TAX1BP3	RZPDp9027G0319Q	-0.175828	7.77619	-1.47816	0.153054	0.764092	-4.41257
3151	RZPDp9027O1618Q	ERI3	RZPDp9027O1618Q	-0.175787	9.7515	-1.44113	0.163149	0.775771	-4.44264
3653	RZPDp9028P0914Q	CCT2	RZPDp9028P0914Q	-0.17578	7.09696	-1.3469	0.191254	0.784382	-4.51648
4548	RZPDp9027H0511Q	PRKD2	RZPDp9027H0511Q	-0.17576	9.4913	-1.19295	0.245163	0.808197	-4.62848
5964	RZPDp9027A1412Q	POGZ	RZPDp9027A1412Q	-0.175713	8.93446	-0.989299	0.332905	0.836695	-4.75891
8203	RZPDp9027E2211Q	GALE	RZPDp9027E2211Q	-0.175591	10.7263	-0.704344	0.488354	0.892402	-4.9045
5945	RZPDp9028B0320Q	RPL37A	RZPDp9028B0320Q	-0.175586	8.73435	-0.991709	0.331753	0.836578	-4.7575
2641	RZPDp9028J0512Q	RC3H2	RZPDp9028J0512Q	-0.175555	7.25706	-1.55709	0.133229	0.75511	-4.34659
3614	RZPDp9027C0212Q	PTPRA	RZPDp9027C0212Q	-0.175536	8.91671	-1.35219	0.189583	0.784382	-4.51244
4591	RZPDp9027G101Q	ARL8A	RZPDp9027G101Q	-0.175528	8.03792	-1.185	0.248228	0.809527	-4.63396
1725	RZPDp9028C043Q	AP2M1	RZPDp9028C043Q	-0.175324	7.40344	-1.82277	0.0814855	0.708239	-4.107
2531	RZPDp9027H228Q	YWHAZ	RZPDp9027H228Q	-0.175284	9.98006	-1.58284	0.127239	0.753307	-4.32453
2885	RZPDp9028B1511Q	RBM12	RZPDp9028B1511Q	-0.175182	7.02515	-1.50173	0.146897	0.762868	-4.39313
3802	RZPDp9027M1216Q	NYNRIN	RZPDp9027M1216Q	-0.175064	9.46791	-1.32227	0.199197	0.784382	-4.53514
1287	RZPDp9028E2121Q	ELMO2	RZPDp9028E2121Q	-0.175063	7.22975	-1.99085	0.0586206	0.681307	-3.94307
4834	RZPDp9027P0813Q	EPN2	RZPDp9027P0813Q	-0.175062	9.69951	-1.15245	0.261083	0.809537	-4.65608
2376	RZPDp9027A0915Q	SF1	RZPDp9027A0915Q	-0.175048	8.65547	-1.62123	0.118723	0.747006	-4.29114
1921	RZPDp9027C0720Q	SNRPN	RZPDp9027C0720Q	-0.174994	7.69572	-1.75494	0.0927071	0.723559	-4.17059
3124	RZPDp9028C171Q	CNKSR1	RZPDp9028C171Q	-0.17468	7.27821	-1.44631	0.161704	0.775194	-4.43846
4858	RZPDp9027E216Q	NRBP2	RZPDp9027E216Q	-0.174566	8.77872	-1.14852	0.262666	0.810586	-4.65871
6334	RZPDp9027C1915Q	GUCA1A	RZPDp9027C1915Q	-0.174481	9.88402	-0.938227	0.357966	0.847118	-4.78827
3721	RZPDp9028G2114Q	CALU	RZPDp9028G2114Q	-0.17443	7.18614	-1.33543	0.194922	0.784382	-4.5252
4149	RZPDp9028O1420Q	EIF3F	RZPDp9028O1420Q	-0.17439	7.65653	-1.26164	0.219839	0.794319	-4.57987
3483	RZPDp9027J2313Q	ZNF84	RZPDp9027J2313Q	-0.174387	8.65375	-1.37595	0.182211	0.783523	-4.49413
3101	RZPDp9027A2119Q	ZNF132	RZPDp9027A2119Q	-0.174358	8.17629	-1.45158	0.160248	0.774652	-4.43421
2896	RZPDp9027E132Q	SEC31A	RZPDp9027E132Q	-0.173931	7.99453	-1.49944	0.147486	0.763252	-4.39503
4257	RZPDp9028G0414Q	DCHS1	RZPDp9028G0414Q	-0.173903	7.83916	-1.24159	0.227015	0.799313	-4.59429
4396	RZPDp9027A1614Q	ZC3H11A	RZPDp9027A1614Q	-0.173876	9.72299	-1.21846	0.235515	0.802898	-4.61069
3135	RZPDp9028G227Q	PUF60	RZPDp9028G227Q	-0.173848	7.68973	-1.44434	0.162252	0.775194	-4.44005
2110	RZPDp9028P1315Q	IQGAP2	RZPDp9028P1315Q	-0.173724	7.37336	-1.69505	0.103688	0.736618	-4.22539
4271	RZPDp9028H091Q	RALBP1	RZPDp9028H091Q	-0.173705	8.08369	-1.23907	0.227931	0.799985	-4.5961
3161	RZPDp9027I0913Q	CNOT3	RZPDp9027I0913Q	-0.17366	8.41204	-1.43914	0.163706	0.775771	-4.44424
2488	RZPDp9027L0115Q	VIM	RZPDp9027L0115Q	-0.173593	8.42791	-1.59294	0.124949	0.752861	-4.31579
2646	RZPDp9027C1115Q	ACTR3	RZPDp9027C1115Q	-0.173562	10.2357	-1.5562	0.133441	0.75511	-4.34735
1754	RZPDp9027A027Q	CNRIP1	RZPDp9027A027Q	-0.173551	7.1181	-1.81175	0.0832252	0.7114	-4.11744
1562	RZPDp9027K1720Q	PKM	RZPDp9027K1720Q	-0.173508	7.27278	-1.87576	0.0735567	0.703841	-4.05627
2824	RZPDp9028D0614Q	CNOT1	RZPDp9028D0614Q	-0.173431	7.07647	-1.51283	0.144068	0.762868	-4.3839
2410	RZPDp9027N0613Q	SGCE	RZPDp9027N0613Q	-0.173383	9.54319	-1.6132	0.120465	0.749432	-4.29818
2645	RZPDp9027O0412Q	PXMP2	RZPDp9027O0412Q	-0.173377	8.67069	-1.55631	0.133415	0.75511	-4.34726
4744	RZPDp9028C0618Q	MCM3	RZPDp9028C0618Q	-0.173371	7.27736	-1.16328	0.256751	0.809527	-4.64877
4079	RZPDp9027A2213Q	NAXD	RZPDp9027A2213Q	-0.173348	9.40202	-1.27559	0.214949	0.79008	-4.56973
4902	RZPDp9027I166Q	RPL26L1	RZPDp9027I166Q	-0.173309	8.66182	-1.14155	0.265496	0.81161	-4.66337
4171	RZPDp9027F2211Q	OLA1	RZPDp9027F2211Q	-0.173255	8.6537	-1.25808	0.221101	0.794319	-4.58245
1225	RZPDp9027G088Q	RPL36A	RZPDp9027G088Q	-0.173219	8.92439	-2.01917	0.055384	0.677855	-3.91461
2839	RZPDp9027G2310Q	MARK3	RZPDp9027G2310Q	-0.17309	10.1386	-1.50913	0.145006	0.762868	-4.38698
2702	RZPDp9027A147Q	CAMSAP3	RZPDp9027A147Q	-0.173084	8.52004	-1.54305	0.136592	0.757747	-4.35851
3740	RZPDp9027G2315Q	MRPL44	RZPDp9027G2315Q	-0.173079	9.46994	-1.33245	0.195883	0.784382	-4.52746
2717	RZPDp9028E201Q	CEP164	RZPDp9028E201Q	-0.173004	7.04715	-1.54002	0.137328	0.757747	-4.36108
3317	RZPDp9027O167Q	AP3S2	RZPDp9027O167Q	-0.172959	8.14508	-1.40474	0.173584	0.783523	-4.47162
5861	RZPDp9028F0410Q	HDAC5	RZPDp9028F0410Q	-0.172947	7.63737	-1.0038	0.326013	0.833823	-4.75033
5624	RZPDp9027I0516Q	C1QTNF4	RZPDp9027I0516Q	-0.172888	8.70929	-1.03613	0.311009	0.828783	-4.73079
2755	RZPDp9028I0416Q	RPL3	RZPDp9028I0416Q	-0.17288	7.12491	-1.52726	0.140458	0.762868	-4.37183
3318	RZPDp9027D1111Q	MLLT3	RZPDp9027D1111Q	-0.172776	7.62348	-1.40469	0.173599	0.783523	-4.47166
7694	RZPDp9027H031Q	ERCC5	RZPDp9027H031Q	-0.172745	9.47528	-0.760866	0.454539	0.884978	-4.87922
6276	RZPDp9027O096Q	NONO	RZPDp9027O096Q	-0.172737	9.42848	-0.9459	0.354122	0.845505	-4.78395
5613	RZPDp9028C1812Q	PRRC2A	RZPDp9028C1812Q	-0.172737	7.21609	-1.03752	0.31038	0.828783	-4.72994
8254	RZPDp9027F236Q	TWF2	RZPDp9027F236Q	-0.172694	8.88091	-0.698382	0.492004	0.893702	-4.90706
1796	RZPDp9027J0715Q	CNOT1	RZPDp9027J0715Q	-0.172455	8.45481	-1.79437	0.0860327	0.717103	-4.13382
5667	RZPDp9028N0311Q	NPM1	RZPDp9028N0311Q	-0.172441	7.18972	-1.02916	0.314205	0.830197	-4.73505
4446	RZPDp9028P217Q	POLR3E	RZPDp9028P217Q	-0.172424	7.88137	-1.211	0.238304	0.803621	-4.61593
5539	RZPDp9027M0615Q	NRDC	RZPDp9027M0615Q	-0.172356	7.82576	-1.05002	0.304717	0.824776	-4.72223
5134	RZPDp9027G0510Q	HMG20A	RZPDp9027G0510Q	-0.172232	8.40734	-1.1053	0.280562	0.819262	-4.68718
7144	RZPDp9027O016Q	PCIF1	RZPDp9027O016Q	-0.172031	9.52411	-0.830182	0.415048	0.871055	-4.84574
2567	RZPDp9027K1216Q	TUBG1	RZPDp9027K1216Q	-0.172025	9.71897	-1.57362	0.129357	0.754853	-4.33245
1327	RZPDp9028I1710Q	PDRG1	RZPDp9028I1710Q	-0.172023	7.28634	-1.97521	0.0604786	0.681699	-3.95868
4098	RZPDp9027L2418Q	MYO18A	RZPDp9027L2418Q	-0.171944	8.40289	-1.2704	0.21676	0.792353	-4.57352
1175	RZPDp9028G0311Q	DCAF5	RZPDp9028G0311Q	-0.171918	7.07165	-2.04519	0.052551	0.67055	-3.88826
3128	RZPDp9027D0710Q	PPP1R18	RZPDp9027D0710Q	-0.171802	8.15441	-1.44611	0.161761	0.775194	-4.43863
4286	RZPDp9027D079Q	HNRNPA1	RZPDp9027D079Q	-0.171794	8.52689	-1.23615	0.228991	0.801043	-4.59817
3790	RZPDp9027I1812Q	EXT2	RZPDp9027I1812Q	-0.171691	9.38188	-1.32428	0.198539	0.784382	-4.53363
5153	RZPDp9027K2416Q	CUL9	RZPDp9027K2416Q	-0.171564	9.19578	-1.10275	0.281647	0.819352	-4.68883
1641	RZPDp9028C1916Q	RO60	RZPDp9028C1916Q	-0.171552	7.56285	-1.84791	0.0776359	0.703841	-4.08305
1564	RZPDp9028C2414Q	SYMPK	RZPDp9028C2414Q	-0.171546	7.89104	-1.87354	0.0738752	0.703841	-4.05842
2735	RZPDp9027L249Q	DYNLRB1	RZPDp9027L249Q	-0.171516	8.21836	-1.53396	0.138807	0.760832	-4.36619
4912	RZPDp9027L0311Q	SERPIND1	RZPDp9027L0311Q	-0.171421	8.3446	-1.13942	0.266365	0.81161	-4.66478
1486	RZPDp9028G1815Q	LIME1	RZPDp9028G1815Q	-0.171363	7.16979	-1.90411	0.0695971	0.701834	-4.02876
2757	RZPDp9027A087Q	SNX5	RZPDp9027A087Q	-0.171349	9.47759	-1.52704	0.140511	0.762868	-4.372
3404	RZPDp9027P1210Q	MAPRE1	RZPDp9027P1210Q	-0.171344	8.49891	-1.389	0.178257	0.783523	-4.48397
7037	RZPDp9027M2015Q	RBM15B	RZPDp9027M2015Q	-0.171068	9.33173	-0.847292	0.405643	0.864261	-4.83707
1635	RZPDp9027P1016Q	DCTN2	RZPDp9027P1016Q	-0.171034	8.24267	-1.84982	0.0773502	0.703841	-4.08122
2097	RZPDp9028D2315Q	AP1G2	RZPDp9028D2315Q	-0.171019	6.95201	-1.69802	0.103118	0.736618	-4.2227
1444	RZPDp9028J1617Q	DCTN1	RZPDp9028J1617Q	-0.170923	7.67954	-1.91715	0.0678396	0.701198	-4.01602
1503	RZPDp9028A0813Q	ESYT1	RZPDp9028A0813Q	-0.170805	6.95713	-1.89617	0.0706866	0.702767	-4.03649
5730	RZPDp9028M113Q	PDIA5	RZPDp9028M113Q	-0.170777	8.58538	-1.02011	0.318386	0.832968	-4.74054
5599	RZPDp9027E0211Q	SLTM	RZPDp9027E0211Q	-0.170766	8.9631	-1.0392	0.309614	0.828712	-4.72891
5233	RZPDp9028M2413Q	MRPS9	RZPDp9028M2413Q	-0.170726	7.59585	-1.09194	0.28627	0.819564	-4.69579
869	RZPDp9028G1513Q	MBD1	RZPDp9028G1513Q	0.188314	7.34435	2.18832	0.0391627	0.669829	-3.74011
3200	RZPDp9028I133Q	UBE2Q1	RZPDp9028I133Q	-0.170533	7.47687	-1.4323	0.165633	0.775771	-4.44972
5786	RZPDp9027J179Q	SEZ6	RZPDp9027J179Q	-0.170521	8.8494	-1.01238	0.321984	0.833446	-4.74519
3093	RZPDp9028J2214Q	TOMM22	RZPDp9028J2214Q	-0.170429	7.13723	-1.45371	0.159659	0.773931	-4.43248
2589	RZPDp9028L242Q	ZNF787	RZPDp9028L242Q	-0.170323	7.39601	-1.5675	0.13078	0.75511	-4.3377
1567	RZPDp9027C229Q	ZNF250	RZPDp9027C229Q	-0.170264	8.04401	-1.87281	0.0739796	0.703841	-4.05912
3732	RZPDp9027A1410Q	SUPT4H1	RZPDp9027A1410Q	-0.170207	8.12116	-1.33306	0.195686	0.784382	-4.527
3220	RZPDp9027P1013Q	PSMD10	RZPDp9027P1013Q	-0.170084	10.0837	-1.42759	0.16697	0.77703	-4.45348
2695	RZPDp9028H0516Q	H2BC5	RZPDp9028H0516Q	-0.170052	8.65866	-1.54492	0.136141	0.757387	-4.35693
5446	RZPDp9028H2015Q	PBX2	RZPDp9028H2015Q	-0.170029	8.03735	-1.06227	0.29924	0.822498	-4.7146
1588	RZPDp9028A0410Q	NCDN	RZPDp9028A0410Q	-0.169942	7.00083	-1.86431	0.07521	0.703841	-4.06731
1765	RZPDp9027K1913Q	IGF2BP2	RZPDp9027K1913Q	-0.169904	9.53951	-1.8069	0.084	0.713432	-4.12202
4818	RZPDp9027G0611Q	CLEC3B	RZPDp9027G0611Q	-0.169866	9.52241	-1.15418	0.260387	0.809527	-4.65491
2160	RZPDp9027G013Q	RPS3	RZPDp9027G013Q	-0.169828	8.08205	-1.67765	0.107079	0.742875	-4.24107
3579	RZPDp9027H2018Q	LRRC47	RZPDp9027H2018Q	-0.169812	8.32037	-1.35762	0.187875	0.784382	-4.50827
4718	RZPDp9027A2011Q	EID1	RZPDp9027A2011Q	-0.169807	9.29808	-1.16651	0.255472	0.809527	-4.64659
5743	RZPDp9027J2013Q	ESYT1	RZPDp9027J2013Q	-0.169681	9.04213	-1.01815	0.319295	0.832993	-4.74172
1936	RZPDp9028K091Q	PLCB3	RZPDp9028K091Q	-0.169675	7.22609	-1.74719	0.094069	0.726798	-4.17775
4174	RZPDp9027N0914Q	EPB41L2	RZPDp9027N0914Q	-0.169669	9.28236	-1.25798	0.221136	0.794319	-4.58252
2174	RZPDp9027G0813Q	HNRNPH1	RZPDp9027G0813Q	-0.169475	9.53724	-1.67374	0.107855	0.742875	-4.24458
4686	RZPDp9027J0716Q	PITRM1	RZPDp9027J0716Q	-0.169436	8.93744	-1.17014	0.254038	0.809527	-4.64412
2356	RZPDp9027O0318Q	TLCD3B	RZPDp9027O0318Q	-0.169396	8.36719	-1.62752	0.117375	0.746943	-4.28562
2856	RZPDp9027J1717Q	CDKN2D	RZPDp9027J1717Q	-0.169303	7.85348	-1.50545	0.145945	0.762868	-4.39005
3810	RZPDp9027K0117Q	CCND3	RZPDp9027K0117Q	-0.16928	8.16839	-1.3212	0.199546	0.784382	-4.53594
4609	RZPDp9028E0521Q	CAPN2	RZPDp9028E0521Q	-0.169278	7.8108	-1.18111	0.249737	0.809527	-4.63663
8843	RZPDp9027C159Q	TXNRD1	RZPDp9027C159Q	-0.169274	9.05871	-0.632099	0.533613	0.90397	-4.93413
3164	RZPDp9028D022Q	TUBB2A	RZPDp9028D022Q	-0.169179	7.16761	-1.43876	0.163813	0.775771	-4.44454
3152	RZPDp9027C134Q	EVL	RZPDp9027C134Q	-0.169035	8.30384	-1.44086	0.163222	0.775771	-4.44285
2015	RZPDp9028G0319Q	CTSK	RZPDp9028G0319Q	-0.168844	6.92279	-1.72361	0.0983208	0.731535	-4.19941
5563	RZPDp9027B126Q	JMJD6	RZPDp9027B126Q	-0.168805	11.7282	-1.04551	0.306751	0.826547	-4.72502
5050	RZPDp9027P0611Q	GET3	RZPDp9027P0611Q	-0.168793	9.97288	-1.11797	0.275226	0.816913	-4.67893
2414	RZPDp9028C0612Q	SNU13	RZPDp9028C0612Q	-0.168745	7.093	-1.61171	0.12079	0.749902	-4.29947
2344	RZPDp9028B111Q	MINK1	RZPDp9028B111Q	-0.168724	7.3779	-1.63053	0.116733	0.746045	-4.28297
5882	RZPDp9028O2114Q	KIF5B	RZPDp9028O2114Q	-0.168702	7.39955	-1.00107	0.327305	0.834289	-4.75195
3601	RZPDp9027E1817Q	EXOSC10	RZPDp9027E1817Q	-0.168701	8.57844	-1.35447	0.188865	0.784382	-4.5107
2740	RZPDp9027H1011Q	GABBR1	RZPDp9027H1011Q	-0.168598	7.94531	-1.53287	0.139073	0.760992	-4.3671
2596	RZPDp9028B1011Q	ABHD14B	RZPDp9028B1011Q	-0.168565	7.15494	-1.56572	0.131195	0.75511	-4.33922
4763	RZPDp9027N134Q	LDHA	RZPDp9027N134Q	-0.168509	8.25681	-1.16161	0.257416	0.809527	-4.6499
3551	RZPDp9028G1014Q	ARPC4	RZPDp9028G1014Q	-0.168502	7.70823	-1.36363	0.186002	0.784382	-4.50365
4991	RZPDp9027B188Q	NAGK	RZPDp9027B188Q	-0.168353	9.48924	-1.1281	0.271013	0.813921	-4.67228
900	RZPDp9028C0712Q	VIRMA	RZPDp9028C0712Q	0.187919	7.35173	2.16346	0.0412405	0.669829	-3.76621
4710	RZPDp9028N1214Q	ARMC5	RZPDp9028N1214Q	-0.168225	8.17738	-1.16737	0.255129	0.809527	-4.646
4657	RZPDp9027M0318Q	GPR89A	RZPDp9027M0318Q	-0.168218	7.86211	-1.17392	0.252549	0.809527	-4.64154
4950	RZPDp9027H1615Q	SGSM3	RZPDp9027H1615Q	-0.168164	9.81729	-1.13525	0.268072	0.81161	-4.66755
4544	RZPDp9027I0915Q	RPL5	RZPDp9027I0915Q	-0.168135	9.81257	-1.19344	0.244974	0.808197	-4.62814
2475	RZPDp9027K2018Q	PRKRA	RZPDp9027K2018Q	-0.168135	9.10691	-1.59542	0.124394	0.752632	-4.31365
1351	RZPDp9027E2315Q	KLHL7	RZPDp9027E2315Q	-0.168103	7.94136	-1.9639	0.0618541	0.686439	-3.96993
4785	RZPDp9027B2319Q	EIF2A	RZPDp9027B2319Q	-0.168046	8.39156	-1.15801	0.258851	0.809527	-4.65233
3141	RZPDp9028N0918Q	HPRT1	RZPDp9028N0918Q	-0.167914	7.0083	-1.4438	0.162401	0.775194	-4.44048
3195	RZPDp9027D066Q	PGD	RZPDp9027D066Q	-0.167812	8.90364	-1.43309	0.165408	0.775771	-4.44908
1950	RZPDp9028A161Q	SUPT5H	RZPDp9028A161Q	-0.167788	6.96833	-1.74381	0.0946685	0.727283	-4.18086
4020	RZPDp9027M104Q	BCR	RZPDp9027M104Q	-0.167782	8.93901	-1.28633	0.211243	0.787459	-4.56186
5073	RZPDp9027D084Q	TPX2	RZPDp9027D084Q	-0.167736	8.64379	-1.11403	0.27688	0.818032	-4.68151
3912	RZPDp9027K0213Q	LYRM7	RZPDp9027K0213Q	-0.167703	8.85185	-1.30395	0.20527	0.784642	-4.54884
1030	RZPDp9027E162Q	PFN2	RZPDp9027E162Q	0.187636	8.68503	2.09934	0.0470669	0.669829	-3.83283
3752	RZPDp9028O0821Q	RPL9	RZPDp9028O0821Q	-0.167626	9.68253	-1.33033	0.196568	0.784382	-4.52906
3412	RZPDp9028O2015Q	DNM2	RZPDp9028O2015Q	-0.167618	7.08994	-1.38817	0.178506	0.783523	-4.48461
2061	RZPDp9028E2015Q	FAM239B	RZPDp9028E2015Q	-0.167584	7.07309	-1.70917	0.101005	0.734775	-4.21259
2193	RZPDp9028B0816Q	COX5A	RZPDp9028B0816Q	-0.167478	7.24371	-1.6677	0.10906	0.744134	-4.24999
3858	RZPDp9027J031Q	INTS4	RZPDp9027J031Q	-0.167474	7.95653	-1.31368	0.202025	0.784642	-4.54157
3785	RZPDp9028P107Q	KDM6B	RZPDp9028P107Q	-0.167436	7.66768	-1.32518	0.198245	0.784382	-4.53295
4082	RZPDp9027G118Q	PDE4DIP	RZPDp9027G118Q	-0.167413	9.60909	-1.2743	0.215399	0.790878	-4.57068
3051	RZPDp9027O0614Q	ARF1	RZPDp9027O0614Q	-0.167317	10.0395	-1.46514	0.156544	0.769262	-4.42321
950	RZPDp9027F185Q	SMARCC2	RZPDp9027F185Q	0.1875	8.11228	2.14116	0.0431885	0.669829	-3.7895
4569	RZPDp9027P2319Q	YWHAZ	RZPDp9027P2319Q	-0.16731	8.93898	-1.18904	0.246668	0.808958	-4.63118
5440	RZPDp9027M0411Q	TSPOAP1	RZPDp9027M0411Q	-0.167301	8.06462	-1.06307	0.298884	0.822498	-4.71409
2669	RZPDp9027H107Q	VDAC1	RZPDp9027H107Q	-0.167189	8.3309	-1.55163	0.134527	0.755366	-4.35123
2227	RZPDp9028G096Q	TCF4	RZPDp9028G096Q	-0.167102	7.62261	-1.6586	0.110899	0.746045	-4.25811
4391	RZPDp9027K1511Q	KNDC1	RZPDp9027K1511Q	-0.167083	9.35525	-1.21971	0.235048	0.802568	-4.60981
5988	RZPDp9028N0620Q	RPS6	RZPDp9028N0620Q	-0.167062	7.37421	-0.985198	0.334872	0.838465	-4.76132
1945	RZPDp9027O1912Q	RFC1	RZPDp9027O1912Q	-0.167036	9.97621	-1.74597	0.0942855	0.726798	-4.17888
4589	RZPDp9027G218Q	DNAJB2	RZPDp9027G218Q	-0.16698	9.20161	-1.18545	0.248053	0.809527	-4.63365
1496	RZPDp9027L248Q	FSCN1	RZPDp9027L248Q	-0.166891	8.79512	-1.89979	0.0701888	0.702767	-4.03298
3522	RZPDp9027O1711Q	SHTN1	RZPDp9027O1711Q	-0.166869	8.5614	-1.3686	0.184466	0.784343	-4.49982
5102	RZPDp9027J1912Q	ZCCHC12	RZPDp9027J1912Q	-0.166808	9.50761	-1.11014	0.278516	0.818461	-4.68404
4036	RZPDp9027K211Q	NBPF1	RZPDp9027K211Q	-0.1667	9.32703	-1.28302	0.212382	0.788856	-4.5643
1893	RZPDp9027I133Q	METTL17	RZPDp9027I133Q	-0.166504	7.59152	-1.7624	0.0914105	0.72138	-4.16367
3018	RZPDp9028A1921Q	ITM2B	RZPDp9028A1921Q	-0.166484	6.72187	-1.47511	0.153866	0.764382	-4.41507
6464	RZPDp9027B1411Q	POLD2	RZPDp9027B1411Q	-0.16639	9.49483	-0.921795	0.366292	0.849516	-4.79742
2058	RZPDp9028I0310Q	BRD3	RZPDp9028I0310Q	-0.166347	7.16322	-1.71035	0.100784	0.734231	-4.21151
4495	RZPDp9027D0715Q	URM1	RZPDp9027D0715Q	-0.166338	7.21331	-1.20236	0.241568	0.805724	-4.62195
3492	RZPDp9027B014Q	GSN	RZPDp9027B014Q	-0.166132	7.174	-1.37447	0.182662	0.783523	-4.49528
1354	RZPDp9028K1014Q	SNRPA1	RZPDp9028K1014Q	-0.165918	7.2506	-1.96034	0.0622929	0.689777	-3.97346
4372	RZPDp9027O0212Q	PPFIA1	RZPDp9027O0212Q	-0.165899	8.88451	-1.22298	0.233833	0.801887	-4.6075
778	RZPDp9027N212Q	VAPA	RZPDp9027N212Q	0.187031	9.34642	2.23906	0.035213	0.669829	-3.68637
1231	RZPDp9027D1115Q	MPST	RZPDp9027D1115Q	-0.165794	8.74765	-2.01507	0.0558419	0.678323	-3.91874
1312	RZPDp9027C0510Q	NPIPB12	RZPDp9027C0510Q	-0.165744	7.7875	-1.98198	0.0596674	0.681307	-3.95193
3644	RZPDp9028H1120Q	PLEC	RZPDp9028H1120Q	-0.165671	7.9813	-1.34836	0.190793	0.784382	-4.51537
3499	RZPDp9027H1518Q	FGB	RZPDp9027H1518Q	-0.165599	8.64097	-1.37316	0.183064	0.783523	-4.4963
6873	RZPDp9027I2410Q	HID1	RZPDp9027I2410Q	-0.165508	9.20978	-0.86918	0.393811	0.85906	-4.82574
3458	RZPDp9028J2415Q	C8orf33	RZPDp9028J2415Q	-0.16543	7.14496	-1.38056	0.180807	0.783523	-4.49055
1646	RZPDp9028O161Q	CNN2	RZPDp9028O161Q	-0.165421	6.89753	-1.84653	0.0778426	0.703841	-4.08437
4551	RZPDp9027D0412Q	EIF4A2	RZPDp9027D0412Q	-0.165345	9.54122	-1.19227	0.245422	0.808197	-4.62895
3275	RZPDp9027K107Q	KDM5D	RZPDp9027K107Q	-0.165332	9.28866	-1.41309	0.171144	0.783343	-4.46502
1940	RZPDp9028K241Q	AFAP1	RZPDp9028K241Q	-0.165321	7.23397	-1.74699	0.0941039	0.726798	-4.17793
5185	RZPDp9027A2417Q	PA2G4	RZPDp9027A2417Q	-0.1653	8.32076	-1.09763	0.283828	0.819564	-4.69214
4055	RZPDp9028H0517Q	RPL37A	RZPDp9028H0517Q	-0.165283	7.47914	-1.27982	0.213485	0.789139	-4.56664
3180	RZPDp9027M1613Q	DPF1	RZPDp9027M1613Q	-0.165186	8.09382	-1.43584	0.164633	0.775771	-4.44688
2504	RZPDp9027E2217Q	PCDHGC3	RZPDp9027E2217Q	-0.16518	8.96699	-1.58909	0.125819	0.753116	-4.31913
3193	RZPDp9027O0714Q	TBCD	RZPDp9027O0714Q	-0.165176	9.93046	-1.43339	0.165324	0.775771	-4.44885
3399	RZPDp9027A144Q	SNRNP40	RZPDp9027A144Q	-0.165171	8.00219	-1.3899	0.177987	0.783523	-4.48326
3343	RZPDp9027M1617Q	SH2B1	RZPDp9027M1617Q	-0.165117	8.98012	-1.39954	0.175116	0.783523	-4.47571
2363	RZPDp9028L1916Q	DDX24	RZPDp9028L1916Q	-0.165093	7.0113	-1.62456	0.118007	0.747006	-4.28822
5597	RZPDp9028P1615Q	MLLT6	RZPDp9028P1615Q	-0.16508	7.75646	-1.03953	0.30946	0.828712	-4.7287
3920	RZPDp9027C2115Q	USP7	RZPDp9027C2115Q	-0.165047	9.81178	-1.30315	0.205538	0.784642	-4.54943
3821	RZPDp9027N0516Q	RNF114	RZPDp9027N0516Q	-0.164941	7.93719	-1.31979	0.20001	0.784545	-4.537
6197	RZPDp9027J227Q	RPS21	RZPDp9027J227Q	-0.164925	8.46187	-0.954906	0.349645	0.845505	-4.77884
1060	RZPDp9027F225Q	PDIA3	RZPDp9027F225Q	0.186359	9.05279	2.08861	0.0481104	0.669829	-3.84387
4229	RZPDp9028P2217Q	PEBP1	RZPDp9028P2217Q	-0.164746	7.4348	-1.24722	0.224983	0.79737	-4.59026
4404	RZPDp9027H2212Q	VDAC3	RZPDp9027H2212Q	-0.164706	9.24328	-1.21736	0.235925	0.802898	-4.61147
1869	RZPDp9028G1918Q	SPTAN1	RZPDp9028G1918Q	-0.164662	7.09351	-1.7691	0.0902608	0.72138	-4.15744
5489	RZPDp9028C2018Q	HDGF	RZPDp9028C2018Q	-0.164581	6.81473	-1.05668	0.30173	0.824165	-4.71809
3459	RZPDp9027P0416Q	KAT8	RZPDp9027P0416Q	-0.16432	8.54166	-1.38054	0.180813	0.783523	-4.49057
2846	RZPDp9027B0616Q	STAG1	RZPDp9027B0616Q	-0.16431	10.0834	-1.50853	0.145159	0.762868	-4.38749
3130	RZPDp9028H1016Q	EXOSC1	RZPDp9028H1016Q	-0.164249	7.02767	-1.44552	0.161925	0.775194	-4.4391
4365	RZPDp9027H2219Q	ANXA2	RZPDp9027H2219Q	-0.164239	9.08374	-1.22388	0.233499	0.801887	-4.60687
973	RZPDp9028I0513Q	DAZAP1	RZPDp9028I0513Q	0.184848	7.79423	2.1274	0.0444316	0.669829	-3.80381
1392	RZPDp9027K0920Q	RNF138	RZPDp9027K0920Q	-0.163912	7.62319	-1.93752	0.0651721	0.700528	-3.99602
3933	RZPDp9028M209Q	HSPA1B	RZPDp9028M209Q	-0.16376	7.31007	-1.30177	0.206002	0.784642	-4.55046
7114	RZPDp9028A011Q	LOC102724250	RZPDp9028A011Q	-0.163713	8.64619	-0.835012	0.412379	0.869075	-4.84331
2014	RZPDp9027A229Q	ZNRF1	RZPDp9027A229Q	-0.163701	8.67989	-1.72365	0.0983125	0.731535	-4.19937
4983	RZPDp9027E118Q	CDH4	RZPDp9027E118Q	-0.163515	8.43313	-1.12959	0.270398	0.813512	-4.67129
1819	RZPDp9027H2415Q	GNAI1	RZPDp9027H2415Q	-0.16351	8.67067	-1.78457	0.0876505	0.72138	-4.143
2304	RZPDp9028O087Q	RPL12	RZPDp9028O087Q	-0.163503	7.70898	-1.63915	0.114915	0.746045	-4.27537
1749	RZPDp9028O0318Q	HLA-B	RZPDp9028O0318Q	-0.163407	6.86371	-1.81288	0.0830444	0.711387	-4.11637
2167	RZPDp9027E219Q	GSTM2	RZPDp9027E219Q	-0.163219	8.91352	-1.67505	0.107593	0.742875	-4.2434
2295	RZPDp9028H2219Q	RPL4	RZPDp9028H2219Q	-0.163151	6.72738	-1.64145	0.114435	0.746045	-4.27334
2901	RZPDp9028O2210Q	PIP4K2B	RZPDp9028O2210Q	-0.163068	7.64129	-1.49757	0.147968	0.763427	-4.39658
3413	RZPDp9028H081Q	PLEKHA4	RZPDp9028H081Q	-0.163035	7.30936	-1.38813	0.17852	0.783523	-4.48465
2541	RZPDp9027P2112Q	HMGXB3	RZPDp9027P2112Q	-0.163026	8.21128	-1.57996	0.127897	0.753661	-4.32701
3188	RZPDp9028B0921Q	MTA2	RZPDp9028B0921Q	-0.162974	7.64215	-1.43429	0.16507	0.775771	-4.44812
3485	RZPDp9027H0312Q	NDRG2	RZPDp9027H0312Q	-0.162968	8.78548	-1.37583	0.182246	0.783523	-4.49422
3159	RZPDp9027O1717Q	MDP1	RZPDp9027O1717Q	-0.162965	8.42415	-1.43952	0.1636	0.775771	-4.44393
2745	RZPDp9027C0719Q	C19orf44	RZPDp9027C0719Q	-0.162824	8.43516	-1.53138	0.139441	0.761618	-4.36836
2923	RZPDp9027G2319Q	COA4	RZPDp9027G2319Q	-0.16281	8.42732	-1.49345	0.149035	0.763499	-4.39998
4802	RZPDp9028G107Q	RTF2	RZPDp9028G107Q	-0.162746	7.74956	-1.15601	0.259651	0.809527	-4.65368
2246	RZPDp9028I0121Q	RPL7A	RZPDp9028I0121Q	-0.162578	6.87551	-1.65368	0.111904	0.746045	-4.26249
3946	RZPDp9028O145Q	CIP2A	RZPDp9028O145Q	-0.162548	8.45095	-1.29991	0.206628	0.784642	-4.55184
3645	RZPDp9027K0411Q	RNPS1	RZPDp9027K0411Q	-0.162535	8.4675	-1.34819	0.190845	0.784382	-4.5155
1401	RZPDp9028P2417Q	NLRC5	RZPDp9028P2417Q	-0.162533	7.14357	-1.9336	0.065678	0.701198	-3.99988
2264	RZPDp9028N233Q	ACTN1	RZPDp9028N233Q	-0.162525	7.59602	-1.64843	0.112984	0.746045	-4.26715
5607	RZPDp9028F2319Q	MAP4K1	RZPDp9028F2319Q	-0.162505	7.11144	-1.03826	0.31004	0.828712	-4.72948
2511	RZPDp9028I173Q	HNRNPR	RZPDp9028I173Q	-0.162271	6.99009	-1.58715	0.126257	0.753116	-4.3208
5394	RZPDp9027C1913Q	ITSN1	RZPDp9027C1913Q	-0.162136	9.7073	-1.06971	0.295951	0.822138	-4.70993
3273	RZPDp9027M036Q	CANX	RZPDp9027M036Q	-0.162101	8.69658	-1.41362	0.170988	0.783264	-4.46459
4227	RZPDp9027K1713Q	ANP32A	RZPDp9027K1713Q	-0.1621	8.7098	-1.24729	0.224958	0.79737	-4.59021
2793	RZPDp9027H246Q	ZDHHC8P1	RZPDp9027H246Q	-0.162031	8.93348	-1.51794	0.142781	0.762868	-4.37963
9353	RZPDp9027A0717Q	GTF3C6	RZPDp9027A0717Q	-0.161995	8.54076	-0.577208	0.569458	0.91273	-4.95461
1219	RZPDp9028K0321Q	ZEB1	RZPDp9028K0321Q	-0.161974	7.2411	-2.02156	0.0551176	0.677323	-3.91219
1863	RZPDp9028F1020Q	FOXO4	RZPDp9028F1020Q	-0.161888	6.77176	-1.77152	0.0898477	0.72138	-4.15519
3528	RZPDp9028K051Q	PHF20L1	RZPDp9028K051Q	-0.16188	7.15695	-1.36795	0.184666	0.784343	-4.50032
3527	RZPDp9027E1017Q	PTPRF	RZPDp9027E1017Q	-0.161839	8.19625	-1.36798	0.184658	0.784343	-4.5003
2583	RZPDp9027C2019Q	KNSTRN	RZPDp9027C2019Q	-0.161827	7.75148	-1.56904	0.130419	0.75511	-4.33638
2482	RZPDp9028I2420Q	SNW1	RZPDp9028I2420Q	-0.161781	6.80259	-1.59453	0.124594	0.752632	-4.31442
3356	RZPDp9028H079Q	OTUD6B	RZPDp9028H079Q	-0.161616	7.49407	-1.39728	0.175786	0.783523	-4.47748
3049	RZPDp9028C215Q	TBC1D9B	RZPDp9028C215Q	-0.16154	8.3431	-1.46625	0.156243	0.7683	-4.4223
3878	RZPDp9028P2119Q	FAM193A	RZPDp9028P2119Q	-0.161524	7.00799	-1.3093	0.20348	0.784642	-4.54485
5162	RZPDp9027H1915Q	COL11A1	RZPDp9027H1915Q	-0.161428	9.17682	-1.10126	0.282278	0.819556	-4.68979
3720	RZPDp9027L206Q	NMRAL1	RZPDp9027L206Q	-0.161392	8.80063	-1.33545	0.194915	0.784382	-4.52519
4540	RZPDp9028L0815Q	TALDO1	RZPDp9028L0815Q	-0.161319	7.86018	-1.19404	0.244743	0.808061	-4.62773
2614	RZPDp9027H0112Q	TDP2	RZPDp9027H0112Q	-0.161248	8.52266	-1.561	0.132305	0.75511	-4.34326
2339	RZPDp9028M2214Q	DOCK10	RZPDp9028M2214Q	-0.161235	7.90582	-1.63154	0.11652	0.746045	-4.28208
3651	RZPDp9027H235Q	ATF4	RZPDp9027H235Q	-0.161226	8.26567	-1.3472	0.191159	0.784382	-4.51625
2382	RZPDp9027M0915Q	FNTA	RZPDp9027M0915Q	-0.161186	8.15201	-1.6207	0.118838	0.747006	-4.29161
3434	RZPDp9028B0713Q	AMDHD2	RZPDp9028B0713Q	-0.161135	7.21087	-1.38459	0.179584	0.783523	-4.48741
2020	RZPDp9027C1314Q	MANEAL	RZPDp9027C1314Q	-0.161131	7.79801	-1.72173	0.0986668	0.732332	-4.20113
6750	RZPDp9028I131Q	IFRD2	RZPDp9028I131Q	-0.16093	7.82495	-0.88401	0.385922	0.857097	-4.81791
4129	RZPDp9027O0912Q	TFPI2	RZPDp9027O0912Q	-0.160898	9.01761	-1.2648	0.218725	0.793953	-4.57759
4121	RZPDp9027F2210Q	PJA1	RZPDp9027F2210Q	-0.160778	8.88353	-1.26715	0.217897	0.792751	-4.57588
2828	RZPDp9028C1621Q	SAFB	RZPDp9028C1621Q	-0.160653	6.8673	-1.51144	0.144421	0.762868	-4.38506
2509	RZPDp9027F0714Q	FXYD6	RZPDp9027F0714Q	-0.16056	10.3952	-1.58759	0.126159	0.753116	-4.32043
2971	RZPDp9027J1712Q	ATP6V1A	RZPDp9027J1712Q	-0.16042	9.41125	-1.48139	0.152199	0.764092	-4.40992
5046	RZPDp9027P0913Q	GLRX	RZPDp9027P0913Q	-0.160313	8.74097	-1.11923	0.274699	0.816204	-4.6781
2373	RZPDp9027H0315Q	CAPZA2	RZPDp9027H0315Q	-0.160281	9.76759	-1.62276	0.118394	0.747006	-4.2898
1698	RZPDp9027F1512Q	VTA1	RZPDp9027F1512Q	-0.160273	9.36855	-1.83249	0.079978	0.703841	-4.09777
1887	RZPDp9028N153Q	PTPRM	RZPDp9028N153Q	-0.160229	7.28581	-1.76451	0.0910467	0.72138	-4.16171
4142	RZPDp9027H106Q	TUBB2A	RZPDp9027H106Q	-0.160207	8.81575	-1.26293	0.219384	0.793953	-4.57894
2558	RZPDp9027B0811Q	PTPRF	RZPDp9027B0811Q	-0.160206	8.16769	-1.57599	0.128809	0.754853	-4.33042
1700	RZPDp9028H0915Q	EIF1	RZPDp9028H0915Q	-0.160188	6.8862	-1.83219	0.0800242	0.703841	-4.09805
4169	RZPDp9027B0318Q	TBL3	RZPDp9027B0318Q	-0.160175	8.12398	-1.25815	0.221076	0.794319	-4.5824
5385	RZPDp9027C1013Q	PSMC3	RZPDp9027C1013Q	-0.160124	10.0263	-1.07077	0.295483	0.822138	-4.70926
1998	RZPDp9027I1710Q	SLC4A1AP	RZPDp9027I1710Q	-0.160083	7.77801	-1.72856	0.0974143	0.730179	-4.19488
5683	RZPDp9027B0912Q	SLC25A39	RZPDp9027B0912Q	-0.16002	9.3258	-1.02775	0.314855	0.830197	-4.73591
4307	RZPDp9028O2014Q	PSME4	RZPDp9028O2014Q	-0.159973	8.06334	-1.23212	0.230467	0.801548	-4.60104
4218	RZPDp9028L1616Q	RPS15A	RZPDp9028L1616Q	-0.15997	7.02061	-1.24868	0.224459	0.797327	-4.58922
3983	RZPDp9028B177Q	UBL4A	RZPDp9028B177Q	-0.159888	7.99045	-1.29373	0.208719	0.785501	-4.55641
3205	RZPDp9028P224Q	ASH1L	RZPDp9028P224Q	-0.159807	7.39401	-1.43152	0.165855	0.775868	-4.45035
2261	RZPDp9028G1519Q	SKIV2L	RZPDp9028G1519Q	-0.159804	6.95095	-1.64945	0.112773	0.746045	-4.26625
2179	RZPDp9027O048Q	HIF1A	RZPDp9027O048Q	-0.159754	8.63525	-1.67318	0.107965	0.742875	-4.24508
4040	RZPDp9028C0715Q	DOCK10	RZPDp9028C0715Q	-0.159717	7.01621	-1.28221	0.212659	0.789128	-4.56489
3086	RZPDp9027D2217Q	UBAP2L	RZPDp9027D2217Q	-0.159586	8.89136	-1.45541	0.159192	0.773165	-4.43111
4636	RZPDp9027H2111Q	RPL10A	RZPDp9027H2111Q	-0.159537	9.47847	-1.17678	0.25143	0.809527	-4.6396
2449	RZPDp9027G015Q	GLS2	RZPDp9027G015Q	-0.159502	8.22176	-1.60115	0.123116	0.752557	-4.30867
1369	RZPDp9028F232Q	CFL1	RZPDp9028F232Q	-0.159385	7.2693	-1.9508	0.0634824	0.693924	-3.98291
3588	RZPDp9028L089Q	KDM6B	RZPDp9028L089Q	-0.159329	7.42089	-1.35634	0.188277	0.784382	-4.50926
3066	RZPDp9028K1618Q	DOCK2	RZPDp9028K1618Q	-0.159259	6.98866	-1.46158	0.157508	0.77023	-4.4261
3831	RZPDp9027G151Q	RNF114	RZPDp9027G151Q	-0.159193	8.82755	-1.3177	0.200699	0.784545	-4.53857
2016	RZPDp9027O0120Q	GABARAP	RZPDp9027O0120Q	-0.159177	7.10769	-1.72317	0.0984023	0.731535	-4.19982
3431	RZPDp9027H013Q	PSMD10	RZPDp9027H013Q	-0.159139	8.11449	-1.38512	0.179427	0.783523	-4.487
5395	RZPDp9027J0110Q	ID2	RZPDp9027J0110Q	-0.15902	9.00853	-1.06965	0.295974	0.822138	-4.70996
1742	RZPDp9028E0612Q	LDHA	RZPDp9028E0612Q	-0.158994	7.09313	-1.81556	0.08262	0.710797	-4.11384
7110	RZPDp9027G0317Q	CLNS1A	RZPDp9027G0317Q	-0.158902	8.28834	-0.835668	0.412018	0.868731	-4.84298
2515	RZPDp9028B041Q	EIF4G3	RZPDp9028B041Q	-0.158852	8.1928	-1.58646	0.126414	0.753116	-4.3214
3569	RZPDp9027B246Q	ACAT2	RZPDp9027B246Q	-0.15885	9.67656	-1.35965	0.187242	0.784382	-4.50672
2829	RZPDp9028I139Q	CIB1	RZPDp9028I139Q	-0.158776	6.61835	-1.51136	0.144439	0.762868	-4.38512
6211	RZPDp9027E1914Q	UBXN7	RZPDp9027E1914Q	-0.15867	8.79495	-0.952745	0.350716	0.845505	-4.78007
3283	RZPDp9027A114Q	EXOSC8	RZPDp9027A114Q	-0.158565	8.08747	-1.41152	0.1716	0.783523	-4.46626
992	RZPDp9027F064Q	CKB	RZPDp9027F064Q	0.183509	9.06401	2.11744	0.0453517	0.669829	-3.81414
4797	RZPDp9028N231Q	SPATA2	RZPDp9028N231Q	-0.158503	8.45982	-1.15686	0.259311	0.809527	-4.65311
6370	RZPDp9027G107Q	PPP2R5B	RZPDp9027G107Q	-0.158381	9.18434	-0.934083	0.360053	0.847281	-4.79059
3498	RZPDp9028G1713Q	HSPA4	RZPDp9028G1713Q	-0.158342	7.10654	-1.37337	0.182998	0.783523	-4.49613
4768	RZPDp9027K0416Q	LDHA	RZPDp9027K0416Q	-0.15828	8.51728	-1.16059	0.257824	0.809527	-4.6506
5724	RZPDp9028E192Q	ALKBH6	RZPDp9028E192Q	-0.158208	7.62107	-1.02077	0.318079	0.832968	-4.74014
3882	RZPDp9028J087Q	PEX5	RZPDp9028J087Q	-0.158189	7.43706	-1.30888	0.20362	0.784642	-4.54516
4042	RZPDp9027I2320Q	LYPLA2	RZPDp9027I2320Q	-0.158152	7.30952	-1.28174	0.21282	0.789128	-4.56523
6039	RZPDp9027A1611Q	PRRT2	RZPDp9027A1611Q	-0.158134	9.94379	-0.977579	0.338547	0.84001	-4.76577
3531	RZPDp9028G1020Q	MYO15B	RZPDp9028G1020Q	-0.158081	8.10027	-1.36731	0.184865	0.784343	-4.50082
2887	RZPDp9027E1114Q	PRKCI	RZPDp9027E1114Q	-0.158078	9.6806	-1.50166	0.146915	0.762868	-4.39319
3693	RZPDp9027O0516Q	DIRAS3	RZPDp9027O0516Q	-0.158078	9.74665	-1.34021	0.193388	0.784382	-4.52158
6090	RZPDp9027P2014Q	PPP2R2B	RZPDp9027P2014Q	-0.158033	9.17203	-0.970603	0.341935	0.841812	-4.76982
5070	RZPDp9027P0515Q	LENG8	RZPDp9027P0515Q	-0.158003	9.21285	-1.11482	0.276545	0.817736	-4.68099
1497	RZPDp9028G013Q	C7orf25	RZPDp9028G013Q	-0.15788	6.99396	-1.89965	0.0702076	0.702767	-4.03311
3341	RZPDp9028E1515Q	PRDX3	RZPDp9028E1515Q	-0.157716	6.94219	-1.39981	0.175036	0.783523	-4.47549
5176	RZPDp9027E021Q	NMT2	RZPDp9027E021Q	-0.157681	7.93144	-1.0997	0.282945	0.819556	-4.6908
1282	RZPDp9028K2117Q	RPLP0	RZPDp9028K2117Q	-0.15767	6.84136	-1.99174	0.0585153	0.681307	-3.94217
4143	RZPDp9027H114Q	SUB1	RZPDp9027H114Q	-0.15764	8.24274	-1.26291	0.219392	0.793953	-4.57896
4112	RZPDp9028K1020Q	ANXA6	RZPDp9028K1020Q	-0.157635	8.89697	-1.2688	0.217321	0.792353	-4.57468
7035	RZPDp9027E0320Q	MAGED2	RZPDp9027E0320Q	-0.15758	8.34077	-0.847914	0.405304	0.86372	-4.83675
7374	RZPDp9027D2111Q	ARF5	RZPDp9027D2111Q	-0.157521	9.87819	-0.800366	0.431764	0.877307	-4.86047
4658	RZPDp9027P0516Q	ETV5	RZPDp9027P0516Q	-0.157457	9.37148	-1.17391	0.252554	0.809527	-4.64155
3104	RZPDp9027L168Q	RBM14	RZPDp9027L168Q	-0.157404	8.67362	-1.4507	0.160491	0.77498	-4.43492
5771	RZPDp9028N211Q	EPS8L1	RZPDp9028N211Q	-0.157377	7.57704	-1.01518	0.320676	0.832993	-4.74351
4140	RZPDp9027O072Q	RNH1	RZPDp9027O072Q	-0.157314	7.57798	-1.263	0.219358	0.793953	-4.57889
2022	RZPDp9028O1010Q	NBPF26	RZPDp9028O1010Q	-0.157272	7.55871	-1.72031	0.0989289	0.73305	-4.20243
1809	RZPDp9028F2219Q	ARHGAP9	RZPDp9028F2219Q	-0.157199	6.85158	-1.78985	0.0867754	0.719183	-4.13805
2631	RZPDp9028J194Q	CABIN1	RZPDp9028J194Q	-0.157199	7.81395	-1.55806	0.132999	0.75511	-4.34576
3894	RZPDp9027K0914Q	NBPF12	RZPDp9027K0914Q	-0.157105	9.72504	-1.30623	0.204507	0.784642	-4.54714
2166	RZPDp9028P2010Q	HSP90AA1	RZPDp9028P2010Q	-0.157068	7.20099	-1.67517	0.107571	0.742875	-4.2433
3279	RZPDp9028D1716Q	EIF4G2	RZPDp9028D1716Q	-0.157049	7.00406	-1.41238	0.171349	0.783343	-4.46558
4408	RZPDp9027B0112Q	FOCAD	RZPDp9027B0112Q	-0.157006	9.6822	-1.21696	0.236073	0.802958	-4.61175
3633	RZPDp9028H204Q	LTBP2	RZPDp9028H204Q	-0.156987	7.55202	-1.35004	0.19026	0.784382	-4.51408
3440	RZPDp9027P0513Q	MAGED4B	RZPDp9027P0513Q	-0.156902	8.22564	-1.38347	0.179924	0.783523	-4.48828
5075	RZPDp9028P2020Q	CORO1A	RZPDp9028P2020Q	-0.156771	6.83384	-1.11356	0.277078	0.818032	-4.68181
2685	RZPDp9027K023Q	RNF220	RZPDp9027K023Q	-0.15673	8.73117	-1.54746	0.135528	0.756774	-4.35478
4929	RZPDp9027H0510Q	QTRT1	RZPDp9027H0510Q	-0.156617	8.69937	-1.13669	0.267479	0.81161	-4.66659
5788	RZPDp9027N2410Q	NASP	RZPDp9027N2410Q	-0.156517	8.23096	-1.01214	0.322095	0.833446	-4.74534
3375	RZPDp9028G1714Q	CLPTM1	RZPDp9028G1714Q	-0.156423	7.92789	-1.39427	0.176681	0.783523	-4.47984
2650	RZPDp9027K095Q	ABCA2	RZPDp9027K095Q	-0.156364	8.93872	-1.55598	0.133493	0.75511	-4.34754
4474	RZPDp9027P1916Q	RPL7	RZPDp9027P1916Q	-0.156337	8.86841	-1.20622	0.240107	0.804408	-4.61927
776	RZPDp9028J041Q	PODXL2	RZPDp9028J041Q	0.182212	8.79055	2.23943	0.0351861	0.669829	-3.68598
6613	RZPDp9027C015Q	RPS12	RZPDp9027C015Q	-0.156129	8.10396	-0.903143	0.375898	0.852133	-4.80763
4961	RZPDp9027K2314Q	EFNB1	RZPDp9027K2314Q	-0.156007	10.2444	-1.13385	0.268645	0.81161	-4.66848
2682	RZPDp9028N042Q	ZBTB38	RZPDp9028N042Q	-0.155862	7.80365	-1.54802	0.135392	0.756774	-4.3543
5923	RZPDp9028K1813Q	PPIL2	RZPDp9028K1813Q	-0.155808	7.58897	-0.994778	0.33029	0.836008	-4.75568
3532	RZPDp9027D2119Q	MAGI1	RZPDp9027D2119Q	-0.155807	8.75301	-1.36714	0.184916	0.784343	-4.50095
5744	RZPDp9028P0715Q	COMMD7	RZPDp9028P0715Q	-0.155678	7.78854	-1.01798	0.319372	0.832993	-4.74182
2903	RZPDp9028G205Q	ELF3	RZPDp9028G205Q	-0.155647	9.58886	-1.49742	0.148007	0.763427	-4.3967
5328	RZPDp9027H0517Q	AP2S1	RZPDp9027H0517Q	-0.155624	8.54483	-1.07857	0.292064	0.820901	-4.70432
3870	RZPDp9027D2214Q	NAA60	RZPDp9027D2214Q	-0.155573	9.7121	-1.3112	0.202847	0.784642	-4.54343
770	RZPDp9027F031Q	PLD2	RZPDp9027F031Q	0.181774	8.83748	2.24315	0.0349109	0.669829	-3.68201
4883	RZPDp9027M0817Q	PLXNA3	RZPDp9027M0817Q	-0.155524	9.03439	-1.14479	0.264176	0.810903	-4.6612
917	RZPDp9028K039Q	DIS3L	RZPDp9028K039Q	0.180793	7.59119	2.15659	0.0418319	0.669829	-3.7734
5152	RZPDp9027E0710Q	EIF4A1	RZPDp9027E0710Q	-0.155508	8.52706	-1.10294	0.281567	0.819352	-4.68871
3637	RZPDp9027H207Q	GEMIN2	RZPDp9027H207Q	-0.155493	8.63603	-1.34934	0.190481	0.784382	-4.51462
4220	RZPDp9027J0513Q	PEF1	RZPDp9027J0513Q	-0.155485	8.38462	-1.24859	0.224491	0.797327	-4.58928
6184	RZPDp9027I156Q	RPL18A	RZPDp9027I156Q	-0.155384	8.36133	-0.957186	0.348518	0.844878	-4.77754
4791	RZPDp9027A1810Q	ZNF527	RZPDp9027A1810Q	-0.155307	8.71468	-1.15733	0.259124	0.809527	-4.65279
2153	RZPDp9028N2014Q	HSPD1	RZPDp9028N2014Q	-0.155284	6.97389	-1.68161	0.1063	0.740247	-4.23751
6331	RZPDp9027J1519Q	MEN1	RZPDp9027J1519Q	-0.155275	8.66214	-0.938395	0.357881	0.847118	-4.78818
7067	RZPDp9027H1510Q	SEC23B	RZPDp9027H1510Q	-0.155112	8.74988	-0.84203	0.408521	0.866662	-4.83975
2977	RZPDp9028M234Q	EEF1A1	RZPDp9028M234Q	-0.155065	7.87296	-1.48059	0.152409	0.764092	-4.41057
4692	RZPDp9027A011Q	KCNG1	RZPDp9027A011Q	-0.155059	8.0411	-1.16934	0.25435	0.809527	-4.64466
5971	RZPDp9027N0110Q	HNRNPR	RZPDp9027N0110Q	-0.155058	8.74442	-0.988253	0.333406	0.837172	-4.75953
3598	RZPDp9027F1317Q	UBL4A	RZPDp9027F1317Q	-0.154991	8.09936	-1.35525	0.188618	0.784382	-4.51009
2577	RZPDp9027G1811Q	DDX5	RZPDp9027G1811Q	-0.154875	7.98274	-1.57155	0.129836	0.75511	-4.33423
2009	RZPDp9027L1718Q	FSCN1	RZPDp9027L1718Q	-0.154874	7.81768	-1.72597	0.0978875	0.730526	-4.19725
1344	RZPDp9027A106Q	RTEL1	RZPDp9027A106Q	-0.154788	9.37917	-1.96535	0.0616759	0.686029	-3.96849
5222	RZPDp9028E211Q	YBX1	RZPDp9028E211Q	-0.154738	7.10275	-1.09324	0.285709	0.819564	-4.69496
2542	RZPDp9028K113Q	MUC20	RZPDp9028K113Q	-0.154648	7.818	-1.57924	0.128061	0.753661	-4.32762
6665	RZPDp9028H023Q	CTNNBL1	RZPDp9028H023Q	-0.154616	7.89185	-0.894917	0.380187	0.854863	-4.81207
1736	RZPDp9028O0521Q	GIT2	RZPDp9028O0521Q	-0.154548	8.07705	-1.8189	0.0820929	0.708934	-4.11068
3363	RZPDp9027C0414Q	GNAS	RZPDp9027C0414Q	-0.154425	10.8649	-1.39582	0.17622	0.783523	-4.47863
1767	RZPDp9028K022Q	KIAA1671	RZPDp9028K022Q	-0.154381	7.10088	-1.80608	0.0841321	0.713861	-4.1228
3435	RZPDp9028K1021Q	MYH9	RZPDp9028K1021Q	-0.154224	8.10892	-1.38447	0.179622	0.783523	-4.48751
6551	RZPDp9027G0217Q	ACTR1A	RZPDp9027G0217Q	-0.154212	9.34429	-0.911877	0.371379	0.84996	-4.80287
1907	RZPDp9028C065Q	KATNB1	RZPDp9028C065Q	-0.154048	9.07556	-1.75908	0.0919847	0.72138	-4.16675
2891	RZPDp9027J1917Q	HUWE1	RZPDp9027J1917Q	-0.154027	8.1779	-1.4999	0.147368	0.763252	-4.39465
4605	RZPDp9027G044Q	NT5DC2	RZPDp9027G044Q	-0.15391	9.60713	-1.18249	0.249201	0.809527	-4.63568
6785	RZPDp9027G016Q	ARHGAP44	RZPDp9027G016Q	-0.153864	8.46301	-0.879456	0.388333	0.858111	-4.82032
3925	RZPDp9027G162Q	CENPB	RZPDp9027G162Q	-0.153861	7.5605	-1.30277	0.205665	0.784642	-4.54971
4030	RZPDp9027J1414Q	MBOAT7	RZPDp9027J1414Q	-0.153639	9.01353	-1.28502	0.211692	0.787459	-4.56282
5935	RZPDp9027J1511Q	JMJD7-PLA2G4B	RZPDp9027J1511Q	-0.153609	9.32149	-0.993225	0.33103	0.836248	-4.7566
3580	RZPDp9027H2411Q	SMC6	RZPDp9027H2411Q	-0.153606	9.60288	-1.35758	0.187889	0.784382	-4.50831
6272	RZPDp9028I083Q	ANXA2	RZPDp9028I083Q	-0.153526	8.0421	-0.946304	0.35392	0.845505	-4.78372
6078	RZPDp9027M2013Q	MAZ	RZPDp9027M2013Q	-0.153522	9.01305	-0.972776	0.340877	0.840769	-4.76856
6730	RZPDp9028K158Q	MAGI3	RZPDp9028K158Q	-0.153471	7.60132	-0.887254	0.38421	0.855938	-4.81618
4830	RZPDp9028P1918Q	ADH5	RZPDp9028P1918Q	-0.153397	7.50644	-1.15299	0.260864	0.809527	-4.65571
4458	RZPDp9028A1810Q	ARHGAP25	RZPDp9028A1810Q	-0.153354	7.56741	-1.20877	0.239144	0.803834	-4.61749
4799	RZPDp9027O146Q	TRIM46	RZPDp9027O146Q	-0.153322	8.38606	-1.1564	0.259497	0.809527	-4.65342
3628	RZPDp9027J2114Q	GGA2	RZPDp9027J2114Q	-0.153305	9.04489	-1.35044	0.190134	0.784382	-4.51378
1875	RZPDp9028P1519Q	LCK	RZPDp9028P1519Q	-0.153285	7.0791	-1.76739	0.0905527	0.72138	-4.15903
4444	RZPDp9028G199Q	ADCY3	RZPDp9028G199Q	-0.153259	7.41486	-1.21178	0.238012	0.802996	-4.61538
2191	RZPDp9028H1011Q	EZR	RZPDp9028H1011Q	-0.153258	7.03608	-1.66848	0.108904	0.744134	-4.24929
6652	RZPDp9027I0210Q	DDOST	RZPDp9027I0210Q	-0.153245	8.78678	-0.896604	0.379304	0.854863	-4.81117
2340	RZPDp9027N049Q	FBH1	RZPDp9027N049Q	-0.153167	8.8814	-1.63132	0.116567	0.746045	-4.28228
1297	RZPDp9028G0520Q	B2M	RZPDp9028G0520Q	-0.153034	7.34499	-1.98665	0.0591135	0.681307	-3.94726
3327	RZPDp9028L2415Q	RPL11	RZPDp9028L2415Q	-0.152994	8.08365	-1.40146	0.17455	0.783523	-4.4742
1880	RZPDp9028L0412Q	POLR1D	RZPDp9028L0412Q	-0.152974	6.90158	-1.76548	0.0908803	0.72138	-4.16081
5883	RZPDp9027F0516Q	PHC2	RZPDp9027F0516Q	-0.152952	8.45847	-1.00089	0.327388	0.834357	-4.75206
5767	RZPDp9028I0618Q	EEF1B2	RZPDp9028I0618Q	-0.152904	6.85543	-1.01542	0.320565	0.832993	-4.74337
4488	RZPDp9028H0620Q	PGGHG	RZPDp9028H0620Q	-0.152652	7.6938	-1.20377	0.241035	0.80509	-4.62098
5383	RZPDp9028I053Q	PRRC1	RZPDp9028I053Q	-0.152609	7.39373	-1.07137	0.295219	0.822138	-4.70888
2519	RZPDp9028K0919Q	RPS6	RZPDp9028K0919Q	-0.152485	6.90869	-1.58553	0.126625	0.753116	-4.3222
4427	RZPDp9027B1317Q	UBE3C	RZPDp9027B1317Q	-0.152453	8.52853	-1.21328	0.237451	0.802976	-4.61433
4270	RZPDp9028G129Q	PHF8	RZPDp9028G129Q	-0.152403	7.25195	-1.23934	0.227833	0.799977	-4.5959
7507	RZPDp9027J1614Q	QRICH2	RZPDp9027J1614Q	-0.152287	10.4357	-0.784702	0.440709	0.879821	-4.86801
2468	RZPDp9028E151Q	HSPG2	RZPDp9028E151Q	-0.152162	6.91811	-1.59736	0.12396	0.752632	-4.31196
2396	RZPDp9028D213Q	MEGF6	RZPDp9028D213Q	-0.152052	7.26377	-1.61779	0.119467	0.747006	-4.29416
2536	RZPDp9027I099Q	C7orf26	RZPDp9027I099Q	-0.152031	8.27293	-1.58168	0.127502	0.753307	-4.32552
8693	RZPDp9027J2111Q	POLR3H	RZPDp9027J2111Q	-0.151969	10.7175	-0.650239	0.52204	0.900177	-4.92698
6535	RZPDp9027E1112Q	RBM22	RZPDp9027E1112Q	-0.151928	9.66611	-0.91292	0.370842	0.849906	-4.8023
5603	RZPDp9028O2021Q	PSMA1	RZPDp9028O2021Q	-0.15187	7.39793	-1.03852	0.309922	0.828712	-4.72932
3474	RZPDp9027O1011Q	HMGB1	RZPDp9027O1011Q	-0.15186	8.7363	-1.37733	0.181788	0.783523	-4.49306
2143	RZPDp9028C0118Q	IGHV4-61	RZPDp9028C0118Q	-0.151803	7.11847	-1.68414	0.105803	0.740006	-4.23523
4050	RZPDp9028G1013Q	TMEM123	RZPDp9028G1013Q	-0.151798	7.43112	-1.28039	0.213287	0.789139	-4.56622
1659	RZPDp9028H1219Q	USP19	RZPDp9028H1219Q	-0.151594	6.64352	-1.84343	0.07831	0.703841	-4.08733
6125	RZPDp9028D221Q	ALG12	RZPDp9028D221Q	-0.151557	8.02508	-0.965434	0.344462	0.842955	-4.77281
2477	RZPDp9027P086Q	GRAMD4	RZPDp9027P086Q	-0.151469	7.79651	-1.59475	0.124543	0.752632	-4.31423
5009	RZPDp9027K2213Q	SEZ6	RZPDp9027K2213Q	-0.151459	9.4838	-1.12438	0.272555	0.81579	-4.67473
8782	RZPDp9027M0213Q	EIF4G2	RZPDp9027M0213Q	-0.151244	9.24171	-0.639519	0.528862	0.902821	-4.93123
2941	RZPDp9027F2216Q	PRPSAP1	RZPDp9027F2216Q	-0.151235	8.74214	-1.49004	0.149924	0.764058	-4.4028
4536	RZPDp9028J158Q	TWF2	RZPDp9028J158Q	-0.151207	7.62124	-1.19467	0.244502	0.807998	-4.62729
2610	RZPDp9027K067Q	RPS8	RZPDp9027K067Q	-0.151189	8.25315	-1.56147	0.132195	0.75511	-4.34286
5282	RZPDp9027A0911Q	C11orf68	RZPDp9027A0911Q	-0.151169	9.62452	-1.08575	0.288942	0.820105	-4.69975
2629	RZPDp9028O0115Q	PSAT1	RZPDp9028O0115Q	-0.151059	6.65592	-1.55831	0.132941	0.75511	-4.34555
6286	RZPDp9027I1110Q	EIF6	RZPDp9027I1110Q	-0.151042	8.8487	-0.944592	0.354775	0.845505	-4.78469
4196	RZPDp9027H1216Q	IZUMO4	RZPDp9027H1216Q	-0.150976	8.56041	-1.25444	0.222396	0.794657	-4.58507
6976	RZPDp9027G2217Q	MIIP	RZPDp9027G2217Q	-0.15092	8.85003	-0.855962	0.400929	0.861529	-4.83261
8749	RZPDp9027J173Q	PYCR1	RZPDp9027J173Q	-0.150845	7.94163	-0.644017	0.525994	0.901386	-4.92945
5276	RZPDp9027L058Q	ACP1	RZPDp9027L058Q	-0.150826	9.21844	-1.08649	0.288619	0.819707	-4.69928
3245	RZPDp9028D122Q	ZNF440	RZPDp9028D122Q	-0.150825	7.68446	-1.42037	0.169037	0.781006	-4.45923
7577	RZPDp9027P1019Q	COA4	RZPDp9027P1019Q	-0.150794	9.08154	-0.773756	0.447028	0.883802	-4.8732
7717	RZPDp9027L2315Q	STMN4	RZPDp9027L2315Q	-0.150787	12.2317	-0.758877	0.455704	0.884978	-4.88014
[truncated: 12,997 more rows]
[truncated: 1 more columns]

## Sheet: Table S3
geneSet	description	enrichment Score	normalized Enrichment Score	pValue	FDR	size	leading Edge Num	userId
R-HSA-1430728	Metabolism	-0.286921	-2.39715	0	0.0065044	165	102	ACAD10; ACAT2; ACSBG1; ADI1; ADSL; AK5; AKR1C1; AKR1C2; ALB; ALDH2; ATP5F1A; B3GNT4; B4GALT2; CRAT; CSPG5; CYB5R3; CYCS; DUT; ECI2; ECSIT; ENO3; ENOPH1; ESYT1; FAHD1; FLAD1; GALE; GBA2; GLUL; GNA11; GPI; GPX4; GSTA4; HSD17B7; IDH2; INPP5E; INPPL1; ISCU; JMJD7-PLA2G4B; KPNB1; LDHA; LPL; MED19; MED23; MPST; NDUFA6; PAPSS1; PDXK; PFKP; PGD; PHGDH; PHKB; PIK3CD; PLCG1; PLPP3; PPP1CA; PSMB1; PSMB2; PS…
R-HSA-162909	Host Interactions of HIV factors	-0.433698	-2.41373	0	0.00731745	35	14	AP1M1; AP2A1; CDK9; DOCK2; KPNB1; PACS1; PSMB1; PSMD11; PSMD7; PSMD8; PSME1; PSME4; SKP1; UBA52
R-HSA-9010553	Regulation of expression of SLITs and ROBOs	-0.407759	-2.4969	0	0.0081305	51	35	PSMB1; PSMB2; PSMD11; PSMD13; PSMD4; PSMD7; PSMD8; PSME1; PSME2; PSME4; ROBO1; RPL10A; RPL11; RPL12; RPL14; RPL22; RPL26; RPL28; RPL3; RPL31; RPL34; RPL6; RPL8; RPL9; RPLP0; RPS11; RPS13; RPS16; RPS19; RPS25; RPS27; RPS3; RPS7; UBA52; UBC
R-HSA-71291	Metabolism of amino acids and derivatives	-0.373233	-2.43964	0	0.0097566	61	40	ADI1; ENOPH1; GLUL; MPST; PHGDH; PSMB1; PSMB2; PSMD11; PSMD13; PSMD4; PSMD7; PSMD8; PSME1; PSME2; PSME4; RPL10A; RPL11; RPL12; RPL14; RPL22; RPL26; RPL28; RPL3; RPL31; RPL34; RPL6; RPL8; RPL9; RPLP0; RPS11; RPS13; RPS16; RPS19; RPS25; RPS27; RPS3; RPS7; SLC3A2; SLC7A5; UBA52
R-HSA-5663205	Infectious disease	-0.350653	-2.47156	0	0.0097566	76	45	AP1M1; AP1S1; AP2A1; AP2M1; CANX; CDK9; DOCK2; KPNB1; PACS1; PPIA; PSMB1; PSMB2; PSMD11; PSMD13; PSMD4; PSMD7; PSMD8; PSME1; PSME2; PSME4; RPL10A; RPL11; RPL12; RPL14; RPL22; RPL26; RPL28; RPL31; RPL34; RPL6; RPL8; RPL9; RPLP0; RPS11; RPS13; RPS16; RPS19; RPS25; RPS27; RPS3; RPS7; SKP1; SSRP1; STX1A; UBA52
R-HSA-72613	Eukaryotic Translation Initiation	-0.373253	-2.16616	0	0.0147306	40	25	EIF2B4; EIF3K; EIF4A2; RPL10A; RPL11; RPL12; RPL14; RPL22; RPL26; RPL28; RPL31; RPL34; RPL6; RPL8; RPL9; RPLP0; RPS11; RPS13; RPS16; RPS19; RPS25; RPS27; RPS3; RPS7; UBA52
R-HSA-72737	Cap-dependent Translation Initiation	-0.373253	-2.16616	0	0.0147306	40	25	EIF2B4; EIF3K; EIF4A2; RPL10A; RPL11; RPL12; RPL14; RPL22; RPL26; RPL28; RPL31; RPL34; RPL6; RPL8; RPL9; RPLP0; RPS11; RPS13; RPS16; RPS19; RPS25; RPS27; RPS3; RPS7; UBA52
R-HSA-156902	Peptide chain elongation	-0.395526	-2.17269	0	0.0159358	36	24	EEF1A1; RPL10A; RPL11; RPL12; RPL14; RPL22; RPL26; RPL28; RPL3; RPL31; RPL34; RPL6; RPL8; RPL9; RPLP0; RPS11; RPS13; RPS16; RPS19; RPS25; RPS27; RPS3; RPS7; UBA52
R-HSA-192823	Viral mRNA Translation	-0.403983	-2.17317	0	0.0166095	34	23	RPL10A; RPL11; RPL12; RPL14; RPL22; RPL26; RPL28; RPL3; RPL31; RPL34; RPL6; RPL8; RPL9; RPLP0; RPS11; RPS13; RPS16; RPS19; RPS25; RPS27; RPS3; RPS7; UBA52
R-HSA-2408557	Selenocysteine synthesis	-0.403983	-2.17317	0	0.0166095	34	23	RPL10A; RPL11; RPL12; RPL14; RPL22; RPL26; RPL28; RPL3; RPL31; RPL34; RPL6; RPL8; RPL9; RPLP0; RPS11; RPS13; RPS16; RPS19; RPS25; RPS27; RPS3; RPS7; UBA52
R-HSA-72764	Eukaryotic Translation Termination	-0.403983	-2.17317	0	0.0166095	34	23	RPL10A; RPL11; RPL12; RPL14; RPL22; RPL26; RPL28; RPL3; RPL31; RPL34; RPL6; RPL8; RPL9; RPLP0; RPS11; RPS13; RPS16; RPS19; RPS25; RPS27; RPS3; RPS7; UBA52
R-HSA-975956	Nonsense Mediated Decay (NMD) independent of the Exon Junction Complex (EJC)	-0.403983	-2.17317	0	0.0166095	34	23	RPL10A; RPL11; RPL12; RPL14; RPL22; RPL26; RPL28; RPL3; RPL31; RPL34; RPL6; RPL8; RPL9; RPLP0; RPS11; RPS13; RPS16; RPS19; RPS25; RPS27; RPS3; RPS7; UBA52
R-HSA-168255	Influenza Life Cycle	-0.366972	-2.11728	0	0.0195132	40	24	CANX; KPNB1; RPL10A; RPL11; RPL12; RPL14; RPL22; RPL26; RPL28; RPL31; RPL34; RPL6; RPL8; RPL9; RPLP0; RPS11; RPS13; RPS16; RPS19; RPS25; RPS27; RPS3; RPS7; UBA52
R-HSA-927802	Nonsense-Mediated Decay (NMD)	-0.411599	-2.23425	0	0.020123	35	24	RPL10A; RPL11; RPL12; RPL14; RPL22; RPL26; RPL28; RPL3; RPL31; RPL34; RPL6; RPL8; RPL9; RPLP0; RPS11; RPS13; RPS16; RPS19; RPS25; RPS27; RPS3; RPS7; SMG6; UBA52
R-HSA-975957	Nonsense Mediated Decay (NMD) enhanced by the Exon Junction Complex (EJC)	-0.411599	-2.23425	0	0.020123	35	24	RPL10A; RPL11; RPL12; RPL14; RPL22; RPL26; RPL28; RPL3; RPL31; RPL34; RPL6; RPL8; RPL9; RPLP0; RPS11; RPS13; RPS16; RPS19; RPS25; RPS27; RPS3; RPS7; SMG6; UBA52
R-HSA-5610787	Hedgehog 'off' state	-0.453039	-2.06509	0.00184502	0.0208683	21	9	PSMB1; PSMD11; PSMD7; PSMD8; PSME1; PSME4; SKP1; TUBA1A; UBA52
R-HSA-168254	Influenza Infection	-0.354641	-2.0682	0	0.02121	41	24	CANX; KPNB1; RPL10A; RPL11; RPL12; RPL14; RPL22; RPL26; RPL28; RPL31; RPL34; RPL6; RPL8; RPL9; RPLP0; RPS11; RPS13; RPS16; RPS19; RPS25; RPS27; RPS3; RPS7; UBA52
R-HSA-72766	Translation	-0.323323	-2.08015	0	0.0212942	55	34	DDOST; EEF1A1; EIF2B4; EIF3K; EIF4A2; MRPL24; MRPL28; MRPL4; MRPS24; MRPS34; NARS2; RPL10A; RPL11; RPL12; RPL14; RPL22; RPL26; RPL28; RPL3; RPL31; RPL34; RPL6; RPL8; RPL9; RPLP0; RPS11; RPS13; RPS16; RPS19; RPS25; RPS27; RPS3; RPS7; UBA52
R-HSA-8878166	Transcriptional regulation by RUNX2	-0.450518	-2.053	0.00533808	0.0213995	21	10	HDAC6; MAPK3; PSMB1; PSMD11; PSMD7; PSMD8; PSME1; PSME4; SKP1; UBA52
R-HSA-156827	L13a-mediated translational silencing of Ceruloplasmin expression	-0.363353	-2.0874	0	0.0217897	39	24	EIF3K; EIF4A2; RPL10A; RPL11; RPL12; RPL14; RPL22; RPL26; RPL28; RPL31; RPL34; RPL6; RPL8; RPL9; RPLP0; RPS11; RPS13; RPS16; RPS19; RPS25; RPS27; RPS3; RPS7; UBA52
R-HSA-216083	Integrin cell surface interactions	0.191724	0.722978	0.827292	0.880029	12	7	CDH1; COL1A1; COL1A2; COL5A1; COMP; FN1; HSPG2
R-HSA-418594	G alpha (i) signalling events	0.160244	0.727065	0.806034	0.90847	20	17	ADCY9; AKR1C1; C3; CALM3; GNAS; GNB2; GPSM1; HSPG2; LDLR; LPAR2; METAP2; NMT1; PLCB4; PRKCD; PRKCQ; RGS12; TTR
R-HSA-2682334	EPH-Ephrin signaling	0.222909	0.763117	0.773626	0.930993	10	5	MMP2; MYH14; MYL6; NCK2; PAK2
R-HSA-8856825	Cargo recognition for clathrin-mediated endocytosis	0.170704	0.642203	0.897436	0.935014	12	7	COPS6; DVL2; EPN1; LDLR; RPS27A; TOR1A; UBQLN1
R-HSA-194840	Rho GTPase cycle	0.200396	0.733127	0.8394	0.936749	11	9	ARHGAP18; ARHGAP30; ARHGDIA; ARHGEF1; ARHGEF6; MYO9A; RALBP1; TRIO; VAV1
R-HSA-3108232	SUMO E3 ligases SUMOylate target proteins	0.21633	0.775638	0.762295	0.951701	10	6	AAAS; NSMCE1; NUP210; NUP62; RAD21; TRIM28
R-HSA-1474290	Collagen formation	0.230321	0.790736	0.728216	0.96849	10	9	COL15A1; COL18A1; COL1A1; COL1A2; COL4A1; COL5A1; CTSB; PLOD3; PPIB
R-HSA-1445148	Translocation of SLC2A4 (GLUT4) to the plasma membrane	0.151894	0.537801	0.956341	0.970918	11	3	ASPSCR1; CALM3; RAB14
R-HSA-114608	Platelet degranulation	0.232389	0.804667	0.702407	0.98978	10	5	ALDOA; CALM3; CLU; FN1; HSPA5
R-HSA-76005	Response to elevated platelet cytosolic Ca2+	0.232389	0.804667	0.702407	0.98978	10	5	ALDOA; CALM3; CLU; FN1; HSPA5
R-HSA-1474244	Extracellular matrix organization	0.249651	1.34853	0.124464	1	30	14	ADAM15; ADAMTS16; CDH1; COL1A1; COL5A1; COMP; CTSK; DAG1; EFEMP1; FN1; LTBP4; MMP2; PLOD3; PPIB
R-HSA-3000171	Non-integrin membrane-ECM interactions	0.377823	1.33576	0.160752	1	10	10	COL1A1; COL1A2; COL4A1; COL5A1; DAG1; FN1; HSPG2; LAMA5; TRAPPC4; TTR
R-HSA-1474228	Degradation of the extracellular matrix	0.284925	1.25375	0.207048	1	18	16	ADAM15; ADAMTS16; CDH1; COL15A1; COL1A1; COL1A2; COL4A1; COL5A1; CTSB; CTSK; FBN1; FBN3; FN1; HSPG2; LAMA5; MMP2
R-HSA-198933	Immunoregulatory interactions between a Lymphoid and a non-Lymphoid cell	0.312113	1.10368	0.325397	1	10	7	C3; CDH1; COL1A1; COL1A2; HLA-A; HLA-C; HLA-E
R-HSA-199992	trans-Golgi Network Vesicle Budding	0.299646	1.05311	0.367304	1	10	5	ACBD3; FTH1; GOLGB1; HIP1R; PUM1
R-HSA-421837	Clathrin derived vesicle budding	0.299646	1.05311	0.367304	1	10	5	ACBD3; FTH1; GOLGB1; HIP1R; PUM1
R-HSA-381119	Unfolded Protein Response (UPR)	0.241736	1.01992	0.418219	1	16	16	ATP6V0D1; CREB3L1; DCTN1; DDX11; EXOSC8; GOSR2; GSK3A; HDGF; HSPA5; HYOU1; JMJD7-PLA2G4B; KHSRP; LMNA; MYDGF; SHC1; XBP1
R-HSA-381426	Regulation of Insulin-like Growth Factor (IGF) transport and uptake by Insulin-like Growth Factor Binding Proteins (IGFBPs)	0.275562	1.01669	0.441304	1	12	6	C3; CHGB; FN1; KTN1; MMP2; NUCB1
R-HSA-8856828	Clathrin-mediated endocytosis	0.218778	0.943916	0.517483	1	18	11	COPS6; CTTN; DVL2; EPN1; FNBP1L; HIP1R; LDLR; PACSIN3; RPS27A; TOR1A; UBQLN1
R-HSA-381070	IRE1alpha activates chaperones	0.240989	0.9211	0.536325	1	13	13	ATP6V0D1; DCTN1; DDX11; GOSR2; GSK3A; HDGF; HSPA5; HYOU1; JMJD7-PLA2G4B; LMNA; MYDGF; SHC1; XBP1

## Sheet: Table S4
names	SYMBOL	ID	logFC	AveExpr	t	P.Value	adj.P.Val	B
RZPDp9027L0217Q	FKBPL	RZPDp9027L0217Q	0.873338	8.93894	2.02124	0.0472265	0.999858	-3.99663
RZPDp9027J2019Q	ARFIP2	RZPDp9027J2019Q	0.665308	9.72801	2.28649	0.0253714	0.999858	-3.75837
RZPDp9028J033Q	MAFF	RZPDp9028J033Q	0.546404	8.5307	2.51716	0.0142127	0.999858	-3.53283
RZPDp9027F197Q	CALM3	RZPDp9027F197Q	0.501878	8.63714	3.46247	0.000933821	0.999858	-2.46014
RZPDp9027E1815Q	TMEM183A	RZPDp9027E1815Q	0.473186	9.78505	2.18102	0.0326725	0.999858	-3.8559
RZPDp9027P1919Q	RTN4	RZPDp9027P1919Q	0.443751	8.20981	2.02505	0.0468229	0.999858	-3.99337
RZPDp9027D0312Q	APBA2	RZPDp9027D0312Q	0.442667	9.03802	2.16459	0.0339624	0.999858	-3.87077
RZPDp9027E0219Q	PPP1CA	RZPDp9027E0219Q	0.430338	7.90004	2.49895	0.0148972	0.999858	-3.55122
RZPDp9027E206Q	SAP30BP	RZPDp9027E206Q	0.426179	9.41655	2.21478	0.030157	0.999858	-3.82508
RZPDp9028G1814Q	ACLY	RZPDp9028G1814Q	0.421994	7.36932	2.03444	0.045842	0.999858	-3.98533
RZPDp9027B1817Q	NSFL1C	RZPDp9027B1817Q	0.411275	8.48747	2.6584	0.00979585	0.999858	-3.38693
RZPDp9027F146Q	AP2A1	RZPDp9027F146Q	0.405762	9.62693	2.28245	0.0256221	0.999858	-3.76217
RZPDp9027F247Q	ZNF266	RZPDp9027F247Q	0.400447	8.42667	2.35963	0.0211946	0.999858	-3.68863
RZPDp9027G2115Q	PODXL2	RZPDp9027G2115Q	0.380381	9.16691	2.15134	0.0350339	0.999858	-3.88269
RZPDp9027A146Q	GPATCH4	RZPDp9027A146Q	0.375653	8.94394	2.38751	0.0197714	0.999858	-3.66161
RZPDp9027B1415Q	COL1A1	RZPDp9027B1415Q	0.373794	8.90891	2.54942	0.0130693	0.999858	-3.50001
RZPDp9027E026Q	EXOG	RZPDp9027E026Q	0.371903	7.60798	2.0004	0.0494849	0.999858	-4.01433
RZPDp9027N1515Q	SQSTM1	RZPDp9027N1515Q	0.369919	8.2301	2.7478	0.00768891	0.999858	-3.29169
RZPDp9027D0311Q	GOLM1	RZPDp9027D0311Q	0.362759	7.81981	2.09674	0.0397697	0.999858	-3.93121
RZPDp9027F038Q	RBM8A	RZPDp9027F038Q	0.352989	9.16267	2.07922	0.0414025	0.999858	-3.94656
RZPDp9028E152Q	TLE2	RZPDp9028E152Q	0.352502	7.37779	2.17277	0.0333144	0.999858	-3.86338
RZPDp9027N055Q	CHCHD4	RZPDp9027N055Q	0.350103	9.48663	2.0347	0.0458144	0.999858	-3.9851
RZPDp9027N1917Q	ATP6V1B2	RZPDp9027N1917Q	0.346233	7.51327	2.17477	0.0331579	0.999858	-3.86157
RZPDp9027F147Q	ZNF423	RZPDp9027F147Q	0.340615	8.41258	2.60414	0.011319	0.999858	-3.44366
RZPDp9028I1413Q	NR1H2	RZPDp9028I1413Q	0.338371	7.24867	2.02584	0.0467396	0.999858	-3.99269
RZPDp9027J146Q	FBXW4	RZPDp9027J146Q	0.333665	8.48553	2.21387	0.0302226	0.999858	-3.82591
RZPDp9028J0213Q	SP2	RZPDp9028J0213Q	0.322313	7.65269	2.04469	0.0447903	0.999858	-3.97651
RZPDp9027A036Q	SMARCE1	RZPDp9027A036Q	0.320323	8.65675	2.83341	0.00606876	0.999858	-3.19848
RZPDp9028J0810Q	ABCF1	RZPDp9028J0810Q	0.315086	7.63682	2.00287	0.0492125	0.999858	-4.01224
RZPDp9027F1918Q	SRSF9	RZPDp9027F1918Q	0.305835	8.29202	2.09197	0.0402086	0.999858	-3.9354
RZPDp9027N047Q	TANK	RZPDp9027N047Q	0.304761	8.69346	2.00158	0.0493548	0.999858	-4.01334
RZPDp9027J062Q	ZMYND8	RZPDp9027J062Q	0.304516	8.99627	2.2507	0.0276685	0.999858	-3.79186
RZPDp9028E144Q	IL4R	RZPDp9028E144Q	0.300553	7.60828	2.27553	0.0260562	0.999858	-3.76867
RZPDp9028E245Q	KHSRP	RZPDp9028E245Q	0.297443	7.86183	2.16548	0.033891	0.999858	-3.86996
RZPDp9027E1619Q	UBE2Q2	RZPDp9027E1619Q	0.295661	7.69579	2.29127	0.0250776	0.999858	-3.75386
RZPDp9027A162Q	CIRBP	RZPDp9027A162Q	0.294035	8.92433	2.12707	0.0370742	0.999858	-3.90438
RZPDp9027C129Q	EAPP	RZPDp9027C129Q	0.291866	9.14442	2.29656	0.0247561	0.999858	-3.74886
RZPDp9027E194Q	ABT1	RZPDp9027E194Q	0.290461	9.17568	2.09661	0.0397811	0.999858	-3.93132
RZPDp9027A042Q	FBXL16	RZPDp9027A042Q	0.287423	8.70419	2.74928	0.00765792	0.999858	-3.2901
RZPDp9027F062Q	SPSB3	RZPDp9027F062Q	0.286556	8.87177	2.703	0.00868647	0.999858	-3.33969
RZPDp9027J165Q	GART	RZPDp9027J165Q	0.285171	9.08408	2.44682	0.017024	0.999858	-3.60333
RZPDp9027M145Q	BRD9	RZPDp9027M145Q	0.284703	8.1467	2.16041	0.0342969	0.999858	-3.87453
RZPDp9027M084Q	SLC35B2	RZPDp9027M084Q	0.284018	9.83204	2.61905	0.0108802	0.999858	-3.42815
RZPDp9027I044Q	SLC35B2	RZPDp9027I044Q	0.283598	9.05504	2.06278	0.0429868	0.999858	-3.96087
RZPDp9027A073Q	GNAS	RZPDp9027A073Q	0.280386	7.9399	2.98387	0.00396057	0.999858	-3.03012
RZPDp9027N152Q	DPF2	RZPDp9027N152Q	0.27806	8.68638	2.33669	0.0224335	0.999858	-3.71068
RZPDp9027B217Q	ACBD3	RZPDp9027B217Q	0.269864	8.90149	2.1829	0.0325278	0.999858	-3.85419
RZPDp9027A0619Q	DYNC1I2	RZPDp9027A0619Q	0.265386	7.8396	2.49605	0.0150089	0.999858	-3.55415
RZPDp9027F198Q	RNF113A	RZPDp9027F198Q	0.263695	9.27955	2.11519	0.0381107	0.999858	-3.91493
RZPDp9028O2019Q	PREX1	RZPDp9028O2019Q	0.263132	7.32545	2.45282	0.0167657	0.999858	-3.59737
RZPDp9027E055Q	CUX1	RZPDp9027E055Q	0.263039	9.27562	2.14503	0.035555	0.999858	-3.88835
RZPDp9027E1419Q	NFYC	RZPDp9027E1419Q	0.262881	7.44132	2.38249	0.0200212	0.999858	-3.66649
RZPDp9028A1216Q	PPP6R1	RZPDp9028A1216Q	0.261161	7.21716	2.26167	0.0269457	0.999858	-3.78164
RZPDp9027K153Q	PODXL2	RZPDp9027K153Q	0.2606	9.05979	2.12757	0.0370312	0.999858	-3.90393
RZPDp9027F022Q	RASSF1	RZPDp9027F022Q	0.259901	8.73512	2.43055	0.0177412	0.999858	-3.61942
RZPDp9027E046Q	CHURC1	RZPDp9027E046Q	0.257376	8.40625	2.21421	0.0301978	0.999858	-3.8256
RZPDp9027A154Q	RHOBTB2	RZPDp9027A154Q	0.256615	8.4078	2.56486	0.0125521	0.999858	-3.4842
RZPDp9027F077Q	RNASE4	RZPDp9027F077Q	0.256515	8.37905	2.12346	0.0373871	0.999858	-3.90759
RZPDp9028M144Q	EEF1B2	RZPDp9028M144Q	0.255158	7.10059	2.1525	0.0349394	0.999858	-3.88165
RZPDp9027J065Q	KLC2	RZPDp9027J065Q	0.250531	9.21269	2.22031	0.0297612	0.999858	-3.81999
RZPDp9027N127Q	NACAD	RZPDp9027N127Q	0.247688	8.80615	2.13255	0.0366049	0.999858	-3.8995
RZPDp9027A056Q	PHPT1	RZPDp9027A056Q	0.244138	9.33368	2.36776	0.0207707	0.999858	-3.68078
RZPDp9027M124Q	DEDD	RZPDp9027M124Q	0.239525	9.28509	2.27025	0.026392	0.999858	-3.77362
RZPDp9027I043Q	PRIM1	RZPDp9027I043Q	0.239293	8.90863	2.39121	0.0195891	0.999858	-3.658
RZPDp9028C212Q	FN1	RZPDp9028C212Q	0.239278	6.96923	2.13969	0.0360013	0.999858	-3.89313
RZPDp9028M1315Q	SZT2	RZPDp9028M1315Q	0.234745	7.09414	2.15633	0.0346273	0.999858	-3.87821
RZPDp9028A028Q	SLX1A	RZPDp9028A028Q	0.232928	7.32382	2.28728	0.0253223	0.999858	-3.75762
RZPDp9028H014Q	UBN1	RZPDp9028H014Q	0.232617	7.732	2.16684	0.0337832	0.999858	-3.86874
RZPDp9028A197Q	PLXNA2	RZPDp9028A197Q	0.231004	7.42651	2.17628	0.0330401	0.999858	-3.8602
RZPDp9027M074Q	SPOUT1	RZPDp9027M074Q	0.229701	8.84462	2.20744	0.0306887	0.999858	-3.83181
RZPDp9028A0416Q	NUP188	RZPDp9028A0416Q	0.228976	7.24316	2.26186	0.0269331	0.999858	-3.78146
RZPDp9027M234Q	INTS10	RZPDp9027M234Q	0.227686	9.00682	2.51889	0.0141492	0.999858	-3.53108
RZPDp9027J032Q	CXXC1	RZPDp9027J032Q	0.224469	7.93208	2.05087	0.044167	0.999858	-3.97118
RZPDp9027B1815Q	NSD1	RZPDp9027B1815Q	0.222585	9.65862	2.01194	0.0482231	0.999858	-4.00455
RZPDp9027M1211Q	RBM22	RZPDp9027M1211Q	0.221422	8.25417	2.02428	0.0469041	0.999858	-3.99403
RZPDp9027E174Q	PSMF1	RZPDp9027E174Q	0.216736	8.92149	2.08313	0.0410329	0.999858	-3.94314
RZPDp9027B147Q	IRF2BPL	RZPDp9027B147Q	0.214878	8.02903	2.08756	0.0406177	0.999858	-3.93926
RZPDp9027B069Q	SLC44A1	RZPDp9027B069Q	0.214116	8.52448	2.05031	0.0442236	0.999858	-3.97167
RZPDp9027J082Q	SMARCD3	RZPDp9027J082Q	0.213286	9.45288	2.02341	0.0469961	0.999858	-3.99477
RZPDp9027M1219Q	ATP1A3	RZPDp9027M1219Q	0.210649	7.4684	2.22195	0.029645	0.999858	-3.81848
RZPDp9027N023Q	NFIC	RZPDp9027N023Q	0.208961	8.28815	2.10724	0.0388177	0.999858	-3.92195
RZPDp9028E1219Q	NPM1	RZPDp9028E1219Q	0.207347	6.99532	2.52387	0.0139676	0.999858	-3.52603
RZPDp9028M2117Q	CLK1	RZPDp9028M2117Q	0.20497	6.91544	2.35936	0.0212091	0.999858	-3.68889
RZPDp9027O023Q	PTN	RZPDp9027O023Q	0.204861	8.47372	2.0725	0.0420436	0.999858	-3.95242
RZPDp9027I0415Q	DTYMK	RZPDp9027I0415Q	0.200883	7.74588	1.99946	0.0495887	0.999858	-4.01513
RZPDp9028B242Q	DDX54	RZPDp9028B242Q	0.183179	7.31047	2.00261	0.0492412	0.999858	-4.01246
RZPDp9028M1212Q	VAPA	RZPDp9028M1212Q	0.177365	7.10841	2.05536	0.0437189	0.999858	-3.9673
RZPDp9028M126Q	ZNF775	RZPDp9028M126Q	0.171563	7.34414	2.15039	0.0351125	0.999858	-3.88355
RZPDp9028L0320Q	SCYL1	RZPDp9028L0320Q	0.169403	6.77744	2.23384	0.0288129	0.999858	-3.8075
RZPDp9028E163Q	NSD1	RZPDp9028E163Q	0.169067	7.10635	3.20133	0.0020873	0.999858	-2.77724
RZPDp9028I2417Q	FOSB	RZPDp9028I2417Q	0.167092	6.80968	2.1217	0.0375395	0.999858	-3.90915
RZPDp9028I1415Q	EIF4G2	RZPDp9028I1415Q	0.157227	6.98208	2.06198	0.0430653	0.999858	-3.96157
RZPDp9028I2219Q	TMC8	RZPDp9028I2219Q	0.155114	6.85682	2.11591	0.0380474	0.999858	-3.91429
RZPDp9028H1510Q	MBD1	RZPDp9028H1510Q	0.152288	7.07238	2.04423	0.0448376	0.999858	-3.97691
RZPDp9028H1518Q	YWHAB	RZPDp9028H1518Q	0.143947	6.91678	2.17545	0.0331048	0.999858	-3.86095
RZPDp9028O1218Q	BIRC2	RZPDp9028O1218Q	0.143561	6.94713	2.50228	0.0147697	0.999858	-3.54787
RZPDp9028H0718Q	DHX37	RZPDp9028H0718Q	0.136186	6.84856	2.14746	0.0353533	0.999858	-3.88617
RZPDp9028P0413Q	TSC22D4	RZPDp9028P0413Q	0.1345	6.98543	2.01569	0.0478189	0.999858	-4.00136
RZPDp9028I2412Q	PSMD1	RZPDp9028I2412Q	0.130242	7.15948	2.20221	0.0310731	0.999858	-3.8366
RZPDp9028A1021Q	GAL3ST4	RZPDp9028A1021Q	0.119461	6.77192	2.14681	0.0354074	0.999858	-3.88676
RZPDp9028C1612Q	GOLGA7	RZPDp9028C1612Q	-0.082602	6.89999	-2.08083	0.0412498	0.999858	-3.94516
RZPDp9028K0213Q	SMPD4	RZPDp9028K0213Q	-0.0868102	6.93217	-2.0538	0.0438743	0.999858	-3.96865
RZPDp9028O1021Q	GSS	RZPDp9028O1021Q	-0.100741	6.74555	-2.03908	0.045363	0.999858	-3.98134
RZPDp9028D083Q	FSCN1	RZPDp9028D083Q	-0.10192	7.10828	-2.02144	0.0472046	0.999858	-3.99645
RZPDp9028H1416Q	IL32	RZPDp9028H1416Q	-0.102194	6.74989	-2.37791	0.0202516	0.999858	-3.67094
RZPDp9028O0220Q	METAP1	RZPDp9028O0220Q	-0.102272	6.75767	-2.43432	0.0175727	0.999858	-3.6157
RZPDp9028O0918Q	ZFP90	RZPDp9028O0918Q	-0.104973	6.85646	-2.1224	0.0374793	0.999858	-3.90854
RZPDp9028A1721Q	BAZ1A	RZPDp9028A1721Q	-0.10721	6.74152	-2.09943	0.039524	0.999858	-3.92884
RZPDp9028F1511Q	BICDL1	RZPDp9028F1511Q	-0.111283	7.09569	-2.17161	0.0334059	0.999858	-3.86443
RZPDp9028M0313Q	ELAVL1	RZPDp9028M0313Q	-0.11404	6.72545	-2.23985	0.0284008	0.999858	-3.80195
RZPDp9028O1913Q	LYPLA2	RZPDp9028O1913Q	-0.114439	6.97885	-2.03204	0.046091	0.999858	-3.98739
RZPDp9028I0518Q	ANKZF1	RZPDp9028I0518Q	-0.116698	6.80607	-2.12114	0.0375883	0.999858	-3.90965
RZPDp9028P0819Q	GAA	RZPDp9028P0819Q	-0.117614	7.04799	-2.01053	0.0483756	0.999858	-4.00574
RZPDp9028K101Q	SEC16A	RZPDp9028K101Q	-0.119095	7.0011	-2.39378	0.0194634	0.999858	-3.6555
RZPDp9028G143Q	PSMC3	RZPDp9028G143Q	-0.119195	7.0758	-2.34144	0.0221717	0.999858	-3.70613
RZPDp9028O1618Q	DPP7	RZPDp9028O1618Q	-0.120868	6.78094	-2.30566	0.0242113	0.999858	-3.74025
RZPDp9028I0521Q	RHOT2	RZPDp9028I0521Q	-0.124084	6.69112	-2.18951	0.0320233	0.999858	-3.84819
RZPDp9028M2121Q	SMCHD1	RZPDp9028M2121Q	-0.124872	7.0243	-2.00898	0.0485439	0.999858	-4.00706
RZPDp9028M0913Q	DOT1L	RZPDp9028M0913Q	-0.124967	6.87804	-2.17564	0.0330899	0.999858	-3.86078
RZPDp9028J1613Q	KCNN4	RZPDp9028J1613Q	-0.125306	7.01415	-2.0105	0.048379	0.999858	-4.00577
RZPDp9028O0318Q	HLA-B	RZPDp9028O0318Q	-0.125637	6.84063	-2.03951	0.0453195	0.999858	-3.98098
RZPDp9028H0217Q	UBE2L3	RZPDp9028H0217Q	-0.125901	6.74022	-2.00606	0.0488627	0.999858	-4.00954
RZPDp9028I1716Q	SNX6	RZPDp9028I1716Q	-0.126467	6.8862	-2.07559	0.0417476	0.999858	-3.94973
RZPDp9028C0811Q	DENND1C	RZPDp9028C0811Q	-0.12785	7.02342	-2.02147	0.0472015	0.999858	-3.99643
RZPDp9028M1813Q	FUBP3	RZPDp9028M1813Q	-0.12819	6.9529	-2.10684	0.0388539	0.999858	-3.92231
RZPDp9028A0420Q	SRSF3	RZPDp9028A0420Q	-0.128491	6.77274	-2.05656	0.0436001	0.999858	-3.96627
RZPDp9028H0511Q	RCN2	RZPDp9028H0511Q	-0.129007	6.95399	-2.30695	0.0241352	0.999858	-3.73903
RZPDp9028A161Q	SUPT5H	RZPDp9028A161Q	-0.129791	6.98974	-2.03909	0.0453624	0.999858	-3.98134
RZPDp9028O0218Q	LARP4B	RZPDp9028O0218Q	-0.129963	6.78162	-2.00689	0.0487716	0.999858	-4.00883
RZPDp9028B1812Q	BBLN	RZPDp9028B1812Q	-0.131403	7.0449	-2.36693	0.0208132	0.999858	-3.68157
RZPDp9028H0619Q	MEN1	RZPDp9028H0619Q	-0.13154	7.22209	-1.99852	0.0496934	0.999858	-4.01592
RZPDp9027D0417Q	EDF1	RZPDp9027D0417Q	-0.131849	7.54795	-2.15275	0.034919	0.999858	-3.88143
RZPDp9028C2312Q	HSD17B7	RZPDp9028C2312Q	-0.132427	7.20209	-2.0936	0.0400577	0.999858	-3.93397
RZPDp9028D0513Q	CXXC1	RZPDp9028D0513Q	-0.132968	7.0094	-2.16586	0.033861	0.999858	-3.86962
RZPDp9028B1612Q	GNB2	RZPDp9028B1612Q	-0.134471	7.05532	-2.29597	0.0247918	0.999858	-3.74942
RZPDp9028D1716Q	EIF4G2	RZPDp9028D1716Q	-0.134587	6.97472	-2.01346	0.0480586	0.999858	-4.00325
RZPDp9028D1416Q	FNBP4	RZPDp9028D1416Q	-0.136969	6.83177	-2.48021	0.0156326	0.999858	-3.57005
RZPDp9028H0618Q	NSD1	RZPDp9028H0618Q	-0.138711	6.71608	-2.19126	0.0318908	0.999858	-3.84659
RZPDp9028J1413Q	STRIP1	RZPDp9028J1413Q	-0.139419	6.90988	-2.61398	0.0110276	0.999858	-3.43343
RZPDp9028O1018Q	NUP42	RZPDp9028O1018Q	-0.142944	6.87591	-2.3816	0.0200656	0.999858	-3.66735
RZPDp9028H0616Q	OGDH	RZPDp9028H0616Q	-0.143258	7.1608	-2.35273	0.0215609	0.999858	-3.69528
RZPDp9028N1516Q	S100A9	RZPDp9028N1516Q	-0.143893	6.97237	-2.06359	0.0429076	0.999858	-3.96017
RZPDp9028E1116Q	MOB4	RZPDp9028E1116Q	-0.144088	6.88505	-2.12866	0.036938	0.999858	-3.90297
RZPDp9028G168Q	SINHCAF	RZPDp9028G168Q	-0.144317	6.95176	-2.47285	0.0159299	0.999858	-3.57741
RZPDp9028G102Q	TMEM30B	RZPDp9028G102Q	-0.14442	7.07416	-2.341	0.0221961	0.999858	-3.70655
RZPDp9028C2213Q	SLC27A2	RZPDp9028C2213Q	-0.144615	6.96103	-2.78844	0.0068759	0.999858	-3.24769
RZPDp9028K2117Q	RPLP0	RZPDp9028K2117Q	-0.144809	6.84474	-2.3732	0.0204908	0.999858	-3.67551
RZPDp9028J1118Q	KLF2	RZPDp9028J1118Q	-0.145073	6.90586	-2.66807	0.00954489	0.999858	-3.37673
RZPDp9028L0619Q	STING1	RZPDp9028L0619Q	-0.145739	6.78484	-2.23967	0.0284124	0.999858	-3.8021
RZPDp9028J2116Q	CCT6A	RZPDp9028J2116Q	-0.146832	6.99375	-2.38946	0.019675	0.999858	-3.65971
RZPDp9028A2017Q	EEF1D	RZPDp9028A2017Q	-0.148545	6.89746	-2.346	0.021923	0.999858	-3.70175
RZPDp9028B1918Q	GOLGA8B	RZPDp9028B1918Q	-0.150455	6.98854	-2.13599	0.0363129	0.999858	-3.89643
RZPDp9028E081Q	SMG5	RZPDp9028E081Q	-0.15114	7.07997	-2.24749	0.0278835	0.999858	-3.79485
RZPDp9028E0612Q	LDHA	RZPDp9028E0612Q	-0.15209	7.05527	-2.46964	0.0160615	0.999858	-3.58062
RZPDp9028G0319Q	CTSK	RZPDp9028G0319Q	-0.15458	6.93288	-2.23371	0.0288219	0.999858	-3.80762
RZPDp9028G1519Q	SKIV2L	RZPDp9028G1519Q	-0.158212	6.95897	-2.46456	0.0162713	0.999858	-3.58569
RZPDp9028K0310Q	ERCC3	RZPDp9028K0310Q	-0.161821	7.22026	-2.56224	0.0126387	0.999858	-3.48689
RZPDp9028K0420Q	CCSER2	RZPDp9028K0420Q	-0.162207	6.72205	-2.12654	0.0371206	0.999858	-3.90486
RZPDp9028K1619Q	NACA	RZPDp9028K1619Q	-0.162982	6.8173	-2.21186	0.0303675	0.999858	-3.82776
RZPDp9028F232Q	CFL1	RZPDp9028F232Q	-0.1642	7.21666	-2.27069	0.0263635	0.999858	-3.7732
RZPDp9028C0418Q	HLA-E	RZPDp9028C0418Q	-0.1662	7.22638	-2.60746	0.0112198	0.999858	-3.44021
RZPDp9028C0321Q	VCAN	RZPDp9028C0321Q	-0.166799	7.11747	-2.50707	0.0145882	0.999858	-3.54303
RZPDp9028O161Q	CNN2	RZPDp9028O161Q	-0.168189	6.91798	-2.83837	0.00598535	0.999858	-3.19303
RZPDp9028O2316Q	WDR83	RZPDp9028O2316Q	-0.168736	7.16511	-2.25614	0.0273079	0.999858	-3.7868
RZPDp9028O0413Q	VPS26A	RZPDp9028O0413Q	-0.168737	7.01639	-2.18058	0.0327066	0.999858	-3.8563
RZPDp9028L2112Q	STK10	RZPDp9028L2112Q	-0.170263	7.03059	-2.14647	0.0354352	0.999858	-3.88706
RZPDp9028B2218Q	EEF1D	RZPDp9028B2218Q	-0.171791	6.91136	-2.44414	0.01714	0.999858	-3.60598
RZPDp9028C225Q	PAPLN	RZPDp9028C225Q	-0.171889	7.35274	-2.6935	0.00891267	0.999858	-3.3498
RZPDp9028G0313Q	ZNF217	RZPDp9028G0313Q	-0.173439	7.28045	-2.23575	0.0286816	0.999858	-3.80574
RZPDp9028H0614Q	CD28	RZPDp9028H0614Q	-0.173476	7.06723	-2.08101	0.0412325	0.999858	-3.945
RZPDp9028F2219Q	ARHGAP9	RZPDp9028F2219Q	-0.173891	6.87572	-2.64511	0.0101506	0.999858	-3.4009
RZPDp9028O1616Q	FUS	RZPDp9028O1616Q	-0.174511	6.92748	-2.04964	0.0442908	0.999858	-3.97225
RZPDp9028O1414Q	ERGIC3	RZPDp9028O1414Q	-0.175713	7.28579	-2.02529	0.046797	0.999858	-3.99316
RZPDp9028C0216Q	NBPF26	RZPDp9028C0216Q	-0.176899	7.02299	-2.0345	0.045835	0.999858	-3.98527
RZPDp9028H0819Q	VPS26A	RZPDp9028H0819Q	-0.177388	7.22713	-2.03607	0.0456725	0.999858	-3.98392
RZPDp9028O0217Q	UTY	RZPDp9028O0217Q	-0.177838	7.03111	-2.87422	0.00541272	0.999858	-3.15338
RZPDp9028G2116Q	DGKA	RZPDp9028G2116Q	-0.178053	7.13311	-2.06652	0.0426221	0.999858	-3.95763
RZPDp9028L1916Q	DDX24	RZPDp9028L1916Q	-0.17856	6.98181	-2.32076	0.0233309	0.999858	-3.72589
RZPDp9028N2014Q	HSPD1	RZPDp9028N2014Q	-0.178632	7.00752	-2.17976	0.0327697	0.999858	-3.85704
RZPDp9028P1917Q	TSHZ1	RZPDp9028P1917Q	-0.178832	6.94215	-2.06301	0.042964	0.999858	-3.96067
RZPDp9027E1720Q	APBA3	RZPDp9027E1720Q	-0.178982	7.38998	-2.10414	0.0390969	0.999858	-3.92469
RZPDp9028G157Q	ARPC1B	RZPDp9028G157Q	-0.181343	7.36677	-2.16324	0.0340696	0.999858	-3.87198
RZPDp9028G062Q	SSBP4	RZPDp9028G062Q	-0.181725	7.17578	-2.17374	0.0332383	0.999858	-3.8625
RZPDp9028D2018Q	XBP1	RZPDp9028D2018Q	-0.18173	6.82436	-3.09199	0.00289026	0.999858	-2.90574
RZPDp9028G0217Q	NME1	RZPDp9028G0217Q	-0.182447	6.92766	-2.59681	0.0115404	0.999858	-3.45126
RZPDp9028O1512Q	QARS1	RZPDp9028O1512Q	-0.185662	7.05506	-2.25438	0.0274242	0.999858	-3.78844
RZPDp9028D1721Q	GNAI2	RZPDp9028D1721Q	-0.186737	7.30846	-2.09029	0.0403634	0.999858	-3.93687
RZPDp9028H1417Q	ERICH1	RZPDp9028H1417Q	-0.186913	6.82227	-2.2909	0.0251004	0.999858	-3.75421
RZPDp9028B1014Q	HMGCS1	RZPDp9028B1014Q	-0.186939	7.20961	-2.0374	0.0455364	0.999858	-3.98279
RZPDp9028K1621Q	SLTM	RZPDp9028K1621Q	-0.187067	6.78315	-2.23934	0.028435	0.999858	-3.80241
RZPDp9028K1119Q	TRAPPC2L	RZPDp9028K1119Q	-0.187299	6.77778	-2.16444	0.0339742	0.999858	-3.87091
RZPDp9028H0118Q	NOP56	RZPDp9028H0118Q	-0.188046	7.29707	-2.12418	0.0373243	0.999858	-3.90695
RZPDp9028C1216Q	PLCL2	RZPDp9028C1216Q	-0.188408	7.37773	-2.13139	0.036704	0.999858	-3.90053
RZPDp9028K1618Q	DOCK2	RZPDp9028K1618Q	-0.189768	6.98654	-2.46092	0.0164233	0.999858	-3.58932
RZPDp9028C146Q	GSR	RZPDp9028C146Q	-0.190568	7.23461	-2.01903	0.0474613	0.999858	-3.99851
RZPDp9028B0816Q	COX5A	RZPDp9028B0816Q	-0.190719	7.22541	-2.35158	0.0216223	0.999858	-3.69639
RZPDp9028K0317Q	ESYT1	RZPDp9028K0317Q	-0.190779	6.91734	-2.73694	0.00792067	0.999858	-3.30338
RZPDp9027K023Q	RNF220	RZPDp9027K023Q	-0.191016	8.73122	-2.54923	0.0130759	0.999858	-3.50021
RZPDp9028A0813Q	ESYT1	RZPDp9028A0813Q	-0.193365	6.97692	-2.71983	0.00829858	0.999858	-3.32172
RZPDp9028G0916Q	METTL3	RZPDp9028G0916Q	-0.193733	6.99385	-2.21113	0.0304207	0.999858	-3.82843
RZPDp9027H2016Q	ARL14EP	RZPDp9027H2016Q	-0.193856	7.79014	-2.09234	0.040174	0.999858	-3.93507
RZPDp9028M0612Q	TUBA1B	RZPDp9028M0612Q	-0.195106	7.32739	-2.13099	0.0367381	0.999858	-3.90089
RZPDp9028C1819Q	HNRNPA1	RZPDp9028C1819Q	-0.196319	6.85513	-2.32271	0.0232197	0.999858	-3.72404
RZPDp9028P1714Q	RPL27	RZPDp9028P1714Q	-0.196755	7.06513	-2.43642	0.0174794	0.999858	-3.61363
RZPDp9028L2217Q	SIVA1	RZPDp9028L2217Q	-0.197727	7.37901	-2.14191	0.0358149	0.999858	-3.89114
RZPDp9028J0714Q	MSH2	RZPDp9028J0714Q	-0.19851	7.1046	-2.41172	0.0186053	0.999858	-3.63795
RZPDp9028O222Q	MYH9	RZPDp9028O222Q	-0.199651	7.38533	-2.47913	0.0156758	0.999858	-3.57113
RZPDp9028L153Q	KIAA1217	RZPDp9028L153Q	-0.202341	7.08678	-2.38555	0.0198688	0.999858	-3.66352
RZPDp9028L0814Q	FAAP100	RZPDp9028L0814Q	-0.202561	7.13183	-2.1126	0.0383395	0.999858	-3.91722
RZPDp9028L1917Q	PQBP1	RZPDp9028L1917Q	-0.206615	7.2491	-2.1574	0.0345403	0.999858	-3.87725
RZPDp9028C167Q	KIAA1217	RZPDp9028C167Q	-0.208111	7.27084	-2.43558	0.0175164	0.999858	-3.61445
RZPDp9028C2015Q	HLA-B	RZPDp9028C2015Q	-0.209473	7.20872	-2.34768	0.021832	0.999858	-3.70013
RZPDp9028I2020Q	ANKRD17	RZPDp9028I2020Q	-0.209832	6.77822	-2.40662	0.0188456	0.999858	-3.64295
RZPDp9028J1114Q	SERPINB1	RZPDp9028J1114Q	-0.209927	7.26327	-2.13496	0.0364002	0.999858	-3.89735
RZPDp9028L0214Q	PKN1	RZPDp9028L0214Q	-0.212188	7.04117	-2.34347	0.022061	0.999858	-3.70418
RZPDp9028J2216Q	VPS39	RZPDp9028J2216Q	-0.215542	6.92383	-3.31792	0.00146426	0.999858	-2.63736
RZPDp9027P085Q	SEZ6	RZPDp9027P085Q	-0.218974	8.94308	-2.03476	0.0458087	0.999858	-3.98506
RZPDp9028P2018Q	SIRT2	RZPDp9028P2018Q	-0.219428	6.99763	-2.67132	0.00946191	0.999858	-3.3733
RZPDp9028K195Q	PTPRF	RZPDp9028K195Q	-0.220057	7.626	-2.34036	0.0222308	0.999858	-3.70716
RZPDp9028D0415Q	DNLZ	RZPDp9028D0415Q	-0.221386	7.1235	-2.74481	0.00775215	0.999858	-3.29492
RZPDp9028O213Q	TSPYL2	RZPDp9028O213Q	-0.222133	7.48948	-2.43816	0.0174025	0.999858	-3.61191
RZPDp9028C0511Q	RAD52	RZPDp9028C0511Q	-0.22421	7.28188	-2.78014	0.00703514	0.999858	-3.25671
RZPDp9028K0414Q	METTL2B	RZPDp9028K0414Q	-0.224376	7.53231	-2.08678	0.0406903	0.999858	-3.93995
RZPDp9027O106Q	RETREG3	RZPDp9027O106Q	-0.225939	9.27217	-2.14136	0.0358607	0.999858	-3.89163
RZPDp9028K0410Q	ZNF584	RZPDp9028K0410Q	-0.226198	7.34155	-2.74056	0.00784276	0.999858	-3.29949
RZPDp9028O1916Q	CHMP4A	RZPDp9028O1916Q	-0.226496	6.96026	-2.43676	0.0174642	0.999858	-3.61329
RZPDp9028O024Q	ATIC	RZPDp9028O024Q	-0.226591	7.5446	-2.5577	0.0127897	0.999858	-3.49154
RZPDp9028P2013Q	CERS2	RZPDp9028P2013Q	-0.226883	7.13778	-2.18276	0.0325389	0.999858	-3.85433
RZPDp9028N1019Q	PHC1	RZPDp9028N1019Q	-0.227013	7.07729	-2.51694	0.0142207	0.999858	-3.53306
RZPDp9028C0719Q	TMEM94	RZPDp9028C0719Q	-0.227268	7.00872	-3.00102	0.00376919	0.999858	-3.01057
RZPDp9028J2212Q	SINHCAF	RZPDp9028J2212Q	-0.227465	7.54287	-2.35755	0.0213043	0.999858	-3.69063
RZPDp9028K228Q	RNF19A	RZPDp9028K228Q	-0.228239	7.5848	-1.99692	0.049871	0.999858	-4.01727
RZPDp9028M238Q	APBB1	RZPDp9028M238Q	-0.229157	7.50441	-2.06596	0.0426761	0.999858	-3.95811
RZPDp9028K0321Q	ZEB1	RZPDp9028K0321Q	-0.234154	7.29929	-2.68423	0.00913861	0.999858	-3.35964
RZPDp9028O0516Q	SERBP1	RZPDp9028O0516Q	-0.240509	7.02318	-2.75891	0.00745838	0.999858	-3.27971
RZPDp9028K0720Q	PRKCQ	RZPDp9028K0720Q	-0.24133	7.66856	-2.0505	0.0442042	0.999858	-3.9715
RZPDp9028C2219Q	MYH9	RZPDp9028C2219Q	-0.241945	7.15633	-2.42962	0.0177831	0.999858	-3.62034
RZPDp9028C068Q	EEF1A1	RZPDp9028C068Q	-0.244018	7.67588	-2.07909	0.0414144	0.999858	-3.94667
RZPDp9028B0914Q	SIRT6	RZPDp9028B0914Q	-0.245789	7.83657	-2.28329	0.0255693	0.999858	-3.76137
RZPDp9028M2020Q	ZNF548	RZPDp9028M2020Q	-0.246496	7.6342	-2.36178	0.0210818	0.999858	-3.68655
RZPDp9028D2116Q	RIPK1	RZPDp9028D2116Q	-0.246588	7.25426	-2.56667	0.0124926	0.999858	-3.48234
RZPDp9028H0815Q	KMT2C	RZPDp9028H0815Q	-0.246655	7.3261	-2.61977	0.0108596	0.999858	-3.42741
RZPDp9028D027Q	DRAP1	RZPDp9028D027Q	-0.247393	7.17769	-2.25654	0.0272818	0.999858	-3.78643
RZPDp9028C028Q	ILF3	RZPDp9028C028Q	-0.247956	7.69128	-2.02985	0.0463193	0.999858	-3.98926
RZPDp9028A2016Q	GYS1	RZPDp9028A2016Q	-0.248633	7.32672	-2.35833	0.0212632	0.999858	-3.68988
RZPDp9028N165Q	ZNF219	RZPDp9028N165Q	-0.250949	8.41237	-2.19154	0.0318699	0.999858	-3.84634
RZPDp9028H2020Q	NAP1L1	RZPDp9028H2020Q	-0.252704	7.11916	-2.86914	0.00549073	0.999858	-3.15902
RZPDp9028F0614Q	GPI	RZPDp9028F0614Q	-0.255019	7.46452	-2.73393	0.00798587	0.999858	-3.30661
RZPDp9028K2112Q	CCR7	RZPDp9028K2112Q	-0.255412	7.27293	-2.29767	0.0246889	0.999858	-3.74781
RZPDp9028H0818Q	ICAM3	RZPDp9028H0818Q	-0.257567	7.19044	-3.51378	0.000793887	0.999858	-2.39627
RZPDp9028G1516Q	MAP4K1	RZPDp9028G1516Q	-0.259762	7.30599	-2.50584	0.0146348	0.999858	-3.54428
RZPDp9028D2121Q	APBA3	RZPDp9028D2121Q	-0.260659	7.73163	-2.06595	0.0426773	0.999858	-3.95812
RZPDp9028J194Q	CABIN1	RZPDp9028J194Q	-0.279496	7.94486	-2.08586	0.0407769	0.999858	-3.94076
RZPDp9027D104Q	ARPC4	RZPDp9027D104Q	-0.28138	8.58299	-2.02133	0.0472169	0.999858	-3.99655
RZPDp9028L0917Q	CHFR	RZPDp9028L0917Q	-0.281587	7.23632	-2.11581	0.0380558	0.999858	-3.91438
RZPDp9027O089Q	KIF18B	RZPDp9027O089Q	-0.288476	9.26623	-2.17454	0.033176	0.999858	-3.86178
RZPDp9028O2112Q	CORO7	RZPDp9028O2112Q	-0.288484	7.45871	-2.22383	0.0295124	0.999858	-3.81675
RZPDp9028D0720Q	GRK6	RZPDp9028D0720Q	-0.28899	7.80064	-2.46001	0.0164616	0.999858	-3.59022
RZPDp9027C1716Q	NIPSNAP1	RZPDp9027C1716Q	-0.290143	8.75204	-2.13417	0.0364669	0.999858	-3.89805
RZPDp9027K1015Q	MAN2A2	RZPDp9027K1015Q	-0.293137	8.10143	-2.14795	0.0353134	0.999858	-3.88574
RZPDp9028L0914Q	ATAD3B	RZPDp9028L0914Q	-0.298044	7.90028	-2.03846	0.0454266	0.999858	-3.98187
RZPDp9028K1511Q	AP3D1	RZPDp9028K1511Q	-0.306563	7.41639	-2.84415	0.00588933	0.999858	-3.18665
RZPDp9028P2217Q	PEBP1	RZPDp9028P2217Q	-0.308579	7.46568	-2.4311	0.0177164	0.999858	-3.61887
RZPDp9028D035Q	GREM1	RZPDp9028D035Q	-0.308786	8.74878	-2.53505	0.013568	0.999858	-3.51467
RZPDp9028K1514Q	SLA	RZPDp9028K1514Q	-0.312906	7.50506	-2.32333	0.0231845	0.999858	-3.72345
RZPDp9027H0910Q	MLLT3	RZPDp9027H0910Q	-0.313713	9.81801	-2.25004	0.0277126	0.999858	-3.79248
RZPDp9028G0612Q	AKAP8	RZPDp9028G0612Q	-0.315972	7.36104	-2.32954	0.0228326	0.999858	-3.71752
RZPDp9028H0417Q	BTG2	RZPDp9028H0417Q	-0.316869	7.72819	-2.19093	0.0319156	0.999858	-3.84689
RZPDp9028K108Q	PRPF6	RZPDp9028K108Q	-0.33116	7.87532	-2.44282	0.0171977	0.999858	-3.60729
RZPDp9027P136Q	PIK3R2	RZPDp9027P136Q	-0.333606	9.45504	-2.08582	0.0407806	0.999858	-3.94079
RZPDp9027D044Q	FGF13	RZPDp9027D044Q	-0.337891	8.58121	-2.20523	0.0308505	0.999858	-3.83383
RZPDp9028K0810Q	MCM2	RZPDp9028K0810Q	-0.356154	8.31018	-2.42786	0.0178626	0.999858	-3.62208
RZPDp9027L0818Q	SMARCB1	RZPDp9027L0818Q	-0.371766	8.04804	-2.01794	0.0475782	0.999858	-3.99944
RZPDp9028D135Q	RPL36A	RZPDp9028D135Q	-0.387111	8.58962	-2.34117	0.0221863	0.999858	-3.70638
RZPDp9028O2217Q	ACAD10	RZPDp9028O2217Q	-0.387863	8.19723	-2.02827	0.0464842	0.999858	-3.99061
RZPDp9027P2313Q	CTSC	RZPDp9027P2313Q	-0.393682	9.13581	-2.18001	0.0327505	0.999858	-3.85682
RZPDp9028D052Q	BUB1B	RZPDp9028D052Q	-0.394262	7.35972	-2.33436	0.0225629	0.999858	-3.71291
RZPDp9028F2118Q	LMNA	RZPDp9028F2118Q	-0.417184	7.4126	-3.19131	0.00215107	0.999858	-2.78912
RZPDp9028D062Q	CLDN3	RZPDp9028D062Q	-0.487116	7.9318	-2.61581	0.0109743	0.999858	-3.43153
RZPDp9028B0316Q	PLCG1	RZPDp9028B0316Q	-0.491313	7.60446	-2.61554	0.010982	0.999858	-3.4318
RZPDp9028N1113Q	AGAP2	RZPDp9028N1113Q	-0.567533	7.74132	-2.05519	0.0437363	0.999858	-3.96745
RZPDp9028F1615Q	PLCG1	RZPDp9028F1615Q	-0.572968	7.89042	-2.22358	0.0295295	0.999858	-3.81697
RZPDp9028L227Q	DNAJC9	RZPDp9028L227Q	-0.208976	7.28294	-1.99526	0.0500564	0.999858	-4.01868
RZPDp9028P0518Q	EFHD2	RZPDp9028P0518Q	-0.116341	6.92646	-1.99389	0.0502093	0.999858	-4.01983
RZPDp9027G1116Q	DBI	RZPDp9027G1116Q	-0.187115	9.13521	-1.99253	0.0503623	0.999858	-4.02099
RZPDp9028E2015Q	FAM239B	RZPDp9028E2015Q	-0.142507	7.06195	-1.99156	0.050471	0.999858	-4.0218
RZPDp9027K0916Q	GTF2B	RZPDp9027K0916Q	-0.300236	9.95903	-1.98925	0.0507311	0.999858	-4.02375
RZPDp9028G2219Q	ADGRE5	RZPDp9028G2219Q	-0.208495	6.9452	-1.98815	0.0508557	0.999858	-4.02467
RZPDp9028J0613Q	SRRM2	RZPDp9028J0613Q	0.176482	7.10534	1.98694	0.0509925	0.999858	-4.02569
RZPDp9027B116Q	SEMA4D	RZPDp9027B116Q	0.204625	9.28233	1.98632	0.0510636	0.999858	-4.02622
RZPDp9028F1020Q	FOXO4	RZPDp9028F1020Q	-0.113008	6.75725	-1.98624	0.0510723	0.999858	-4.02628
RZPDp9028M125Q	SCAND1	RZPDp9028M125Q	0.260016	7.81836	1.98593	0.0511074	0.999858	-4.02654
RZPDp9028E2217Q	SELENOH	RZPDp9028E2217Q	0.161835	6.89567	1.98441	0.0512807	0.999858	-4.02782
RZPDp9027J075Q	CYB5R4	RZPDp9027J075Q	0.304513	8.65802	1.98335	0.0514011	0.999858	-4.02871
RZPDp9028O0913Q	KARS1	RZPDp9028O0913Q	-0.230679	7.14046	-1.98078	0.0516957	0.999858	-4.03087
RZPDp9028C1517Q	FLJ37453	RZPDp9028C1517Q	-0.151624	7.08756	-1.97961	0.0518303	0.999858	-4.03185
RZPDp9028P0711Q	GPATCH1	RZPDp9028P0711Q	-0.187472	7.2404	-1.97713	0.052116	0.999858	-4.03393
RZPDp9028K0513Q	U2SURP	RZPDp9028K0513Q	-0.162879	6.95045	-1.97643	0.0521973	0.999858	-4.03452
RZPDp9027A1717Q	SETD4	RZPDp9027A1717Q	-0.203903	7.34256	-1.97625	0.0522185	0.999858	-4.03467
RZPDp9027K0520Q	FAM20C	RZPDp9027K0520Q	-0.182464	7.26639	-1.97608	0.0522383	0.999858	-4.03481
RZPDp9027E173Q	SNX21	RZPDp9027E173Q	0.206984	8.42515	1.97004	0.0529411	0.999858	-4.03986
RZPDp9027E089Q	NEUROD6	RZPDp9027E089Q	0.299047	9.14375	1.96988	0.0529605	0.999858	-4.04
RZPDp9028P1217Q	CCAR1	RZPDp9028P1217Q	0.158728	6.8997	1.96827	0.0531487	0.999858	-4.04134
RZPDp9028D0914Q	DHX30	RZPDp9028D0914Q	-0.292607	7.40086	-1.96582	0.053438	0.999858	-4.04339
RZPDp9027I1418Q	LRPAP1	RZPDp9027I1418Q	0.200077	7.57032	1.96245	0.0538366	0.999858	-4.04619
RZPDp9027A1720Q	ELAVL3	RZPDp9027A1720Q	0.106859	7.11009	1.96231	0.0538531	0.999858	-4.04631
RZPDp9028A018Q	UBXN1	RZPDp9028A018Q	0.241251	7.30106	1.96175	0.0539197	0.999858	-4.04677
RZPDp9028G231Q	FLNB	RZPDp9028G231Q	-0.15194	7.0787	-1.96167	0.0539299	0.999858	-4.04684
RZPDp9028F0816Q	GCN1	RZPDp9028F0816Q	-0.219294	7.53066	-1.96151	0.0539486	0.999858	-4.04697
RZPDp9028N1812Q	MALT1	RZPDp9028N1812Q	0.139777	6.90859	1.95988	0.0541431	0.999858	-4.04833
RZPDp9028K1014Q	SNRPA1	RZPDp9028K1014Q	-0.150358	7.25148	-1.95818	0.0543465	0.999858	-4.04975
RZPDp9028F0520Q	ZBTB33	RZPDp9028F0520Q	-0.221405	8.26425	-1.95763	0.0544119	0.999858	-4.0502
RZPDp9027G065Q	TFPI2	RZPDp9027G065Q	0.180439	8.95619	1.95705	0.0544821	0.999858	-4.05069
RZPDp9028O1520Q	MYBBP1A	RZPDp9028O1520Q	-0.384018	9.56444	-1.95635	0.054566	0.999858	-4.05127
RZPDp9028C0218Q	RABGGTA	RZPDp9028C0218Q	-0.103903	6.85337	-1.95565	0.0546502	0.999858	-4.05185
RZPDp9028O157Q	AKR1C3	RZPDp9028O157Q	-0.17639	7.22426	-1.95525	0.0546987	0.999858	-4.05218
RZPDp9028F0118Q	EIF3L	RZPDp9028F0118Q	0.149056	6.88509	1.95297	0.0549737	0.999858	-4.05407
RZPDp9028H105Q	FRMD8	RZPDp9028H105Q	-0.151939	7.59681	-1.95191	0.055102	0.999858	-4.05495
RZPDp9027H1112Q	TMX2	RZPDp9027H1112Q	-0.228399	8.36495	-1.95177	0.0551186	0.999858	-4.05506
RZPDp9028G0420Q	NFKBIA	RZPDp9028G0420Q	-0.171074	6.89379	-1.9483	0.0555414	0.999858	-4.05794
RZPDp9028P161Q	UBN1	RZPDp9028P161Q	-0.131074	6.97612	-1.94822	0.0555511	0.999858	-4.05801
RZPDp9027D1117Q	DCTN1	RZPDp9027D1117Q	-0.25383	8.15383	-1.94796	0.0555827	0.999858	-4.05822
RZPDp9028P2310Q	RAD21	RZPDp9028P2310Q	0.208379	7.28484	1.94742	0.0556484	0.999858	-4.05867
RZPDp9027B044Q	EIF3D	RZPDp9027B044Q	0.210174	8.85584	1.94649	0.0557625	0.999858	-4.05944
RZPDp9028K1317Q	RPS9	RZPDp9028K1317Q	-0.11026	6.74809	-1.94402	0.0560662	0.999858	-4.06149
RZPDp9028B0716Q	JMJD1C	RZPDp9028B0716Q	-0.18431	7.24187	-1.94335	0.0561487	0.999858	-4.06204
RZPDp9028O0414Q	DNAJA2	RZPDp9028O0414Q	-0.140195	7.11717	-1.94284	0.0562111	0.999858	-4.06246
RZPDp9028G2221Q	ENO3	RZPDp9028G2221Q	-0.175537	7.17449	-1.9423	0.0562779	0.999858	-4.0629
RZPDp9028L172Q	APBB1IP	RZPDp9028L172Q	0.296156	8.37519	1.94225	0.0562837	0.999858	-4.06294
RZPDp9027E032Q	MFN1	RZPDp9027E032Q	0.225428	8.6198	1.94133	0.0563977	0.999858	-4.06371
RZPDp9027F2217Q	MPST	RZPDp9027F2217Q	-0.328813	8.93192	-1.94063	0.0564845	0.999858	-4.06428
RZPDp9028K105Q	FAM234A	RZPDp9028K105Q	-0.18663	7.8039	-1.93998	0.0565643	0.999858	-4.06482
RZPDp9028P0810Q	LGALS1	RZPDp9028P0810Q	-0.143861	7.20479	-1.93992	0.0565724	0.999858	-4.06487
RZPDp9028P2017Q	YBX1	RZPDp9028P2017Q	-0.164758	6.93717	-1.93975	0.0565934	0.999858	-4.06501
RZPDp9028P2218Q	ITK	RZPDp9028P2218Q	-0.277326	7.44486	-1.93906	0.0566791	0.999858	-4.06558
RZPDp9028H069Q	CC2D1B	RZPDp9028H069Q	-0.456665	7.7521	-1.93897	0.0566903	0.999858	-4.06565
RZPDp9028A053Q	VPS51	RZPDp9028A053Q	0.186147	7.70219	1.93847	0.0567523	0.999858	-4.06606
RZPDp9028E0817Q	MYC	RZPDp9028E0817Q	-0.138162	6.92115	-1.93622	0.0570324	0.999858	-4.06792
RZPDp9028D1510Q	PFKL	RZPDp9028D1510Q	-0.304339	8.08815	-1.93406	0.0573028	0.999858	-4.0697
RZPDp9028L204Q	MTURN	RZPDp9028L204Q	-0.224975	7.35895	-1.93285	0.0574542	0.999858	-4.07069
RZPDp9028H1113Q	SNX2	RZPDp9028H1113Q	-0.123833	6.868	-1.93138	0.0576394	0.999858	-4.0719
RZPDp9027J2416Q	UBXN6	RZPDp9027J2416Q	0.247046	9.49355	1.92895	0.0579458	0.999858	-4.07389
RZPDp9027L2019Q	LLGL1	RZPDp9027L2019Q	-0.364077	8.12911	-1.92876	0.0579703	0.999858	-4.07405
RZPDp9028A061Q	GOLGA2	RZPDp9028A061Q	0.14884	6.94675	1.92602	0.0583175	0.999858	-4.0763
RZPDp9027M052Q	NOL12	RZPDp9027M052Q	0.165563	8.70066	1.92576	0.0583513	0.999858	-4.07652
RZPDp9028L2114Q	LIPA	RZPDp9028L2114Q	-0.360924	7.79461	-1.92499	0.0584491	0.999858	-4.07714
RZPDp9027I193Q	CPLX2	RZPDp9027I193Q	0.215678	8.42352	1.92048	0.0590264	0.999858	-4.08084
RZPDp9028C0117Q	NIFK	RZPDp9028C0117Q	-0.142763	6.6754	-1.91919	0.059192	0.999858	-4.08189
RZPDp9028N2114Q	STIM2	RZPDp9028N2114Q	-0.139897	7.12689	-1.91775	0.0593783	0.999858	-4.08307
RZPDp9028G0311Q	DCAF5	RZPDp9028G0311Q	-0.113417	7.07505	-1.9177	0.059385	0.999858	-4.08311
RZPDp9027B038Q	PSME3IP1	RZPDp9027B038Q	0.196812	8.51818	1.91663	0.0595229	0.999858	-4.08398
RZPDp9028B2217Q	HDAC1	RZPDp9028B2217Q	-0.243764	7.71678	-1.91613	0.0595881	0.999858	-4.08439
RZPDp9028C1412Q	TMEM123	RZPDp9028C1412Q	-0.096694	6.90295	-1.91606	0.0595966	0.999858	-4.08445
RZPDp9027P089Q	NDRG2	RZPDp9027P089Q	-0.343851	8.95518	-1.91565	0.0596496	0.999858	-4.08478
RZPDp9027M062Q	CHGB	RZPDp9027M062Q	0.259079	9.25365	1.91421	0.0598368	0.999858	-4.08596
RZPDp9027L053Q	GNAI2	RZPDp9027L053Q	-0.194022	8.47485	-1.91314	0.0599756	0.999858	-4.08683
RZPDp9028D0515Q	UBALD2	RZPDp9028D0515Q	-0.129434	6.96332	-1.91216	0.0601041	0.999858	-4.08763
RZPDp9027E054Q	TPM1	RZPDp9027E054Q	0.19341	8.72145	1.91161	0.0601754	0.999858	-4.08808
RZPDp9028K1616Q	ZBP1	RZPDp9028K1616Q	-0.160431	6.89549	-1.91146	0.0601951	0.999858	-4.0882
RZPDp9028A2210Q	RAB5B	RZPDp9028A2210Q	0.182754	7.47603	1.91039	0.0603348	0.999858	-4.08907
RZPDp9027P2011Q	CAPNS1	RZPDp9027P2011Q	-0.403908	9.31166	-1.91033	0.0603434	0.999858	-4.08912
RZPDp9027G168Q	CSPG5	RZPDp9027G168Q	-0.21198	8.30998	-1.91009	0.0603742	0.999858	-4.08931
RZPDp9028L2216Q	RPS27A	RZPDp9028L2216Q	-0.217018	7.17042	-1.90885	0.0605367	0.999858	-4.09032
RZPDp9027K1118Q	PPIF	RZPDp9027K1118Q	-0.170494	8.30127	-1.90823	0.0606187	0.999858	-4.09083
RZPDp9027J158Q	SUPT5H	RZPDp9027J158Q	0.325225	9.45883	1.90675	0.060813	0.999858	-4.09203
RZPDp9028F1220Q	GSTK1	RZPDp9028F1220Q	0.137275	6.88814	1.90651	0.0608449	0.999858	-4.09223
RZPDp9027F028Q	EFTUD2	RZPDp9027F028Q	0.603289	10.0551	1.90628	0.0608753	0.999858	-4.09241
RZPDp9028C1711Q	NLE1	RZPDp9028C1711Q	0.222335	7.54073	1.90625	0.0608789	0.999858	-4.09244
RZPDp9027M059Q	PEPD	RZPDp9027M059Q	0.459908	8.04274	1.90479	0.0610723	0.999858	-4.09363
RZPDp9028G063Q	TSC2	RZPDp9028G063Q	-0.118343	7.1478	-1.90387	0.0611947	0.999858	-4.09438
RZPDp9028L1014Q	TCP1	RZPDp9028L1014Q	-0.173648	7.1422	-1.90333	0.0612656	0.999858	-4.09481
RZPDp9028D1018Q	NDUFA13	RZPDp9028D1018Q	-0.125999	6.97035	-1.9033	0.0612695	0.999858	-4.09483
RZPDp9028J1318Q	SAFB2	RZPDp9028J1318Q	0.155308	6.86875	1.90314	0.0612911	0.999858	-4.09497
RZPDp9027C192Q	AKR7A2	RZPDp9027C192Q	0.175599	9.99721	1.90072	0.0616126	0.999858	-4.09693
RZPDp9027G1019Q	KLC2	RZPDp9027G1019Q	-0.156732	7.95408	-1.89927	0.0618063	0.999858	-4.0981
RZPDp9028H209Q	CACYBP	RZPDp9028H209Q	-0.145908	7.03563	-1.89839	0.0619239	0.999858	-4.09882
RZPDp9028O2210Q	PIP4K2B	RZPDp9028O2210Q	-0.219363	7.6223	-1.89803	0.0619725	0.999858	-4.09911
RZPDp9028I0613Q	GLS	RZPDp9028I0613Q	-0.158004	6.93077	-1.89784	0.0619976	0.999858	-4.09926
RZPDp9028O0617Q	HSH2D	RZPDp9028O0617Q	-0.15928	7.01039	-1.8973	0.0620696	0.999858	-4.0997
RZPDp9028G2416Q	KAT6A	RZPDp9028G2416Q	-0.168067	6.93607	-1.89611	0.0622302	0.999858	-4.10066
RZPDp9028I148Q	TOR1A	RZPDp9028I148Q	0.255518	7.36345	1.89572	0.0622822	0.999858	-4.10098
RZPDp9028K223Q	ARPC5L	RZPDp9028K223Q	-0.210025	7.94859	-1.89435	0.0624667	0.999858	-4.10209
RZPDp9028G235Q	FGFR1	RZPDp9028G235Q	-0.171741	7.86482	-1.89416	0.0624923	0.999858	-4.10224
RZPDp9027C2314Q	ISCU	RZPDp9027C2314Q	-0.314106	9.73028	-1.89396	0.0625197	0.999858	-4.1024
RZPDp9028D1521Q	ZNF431	RZPDp9028D1521Q	-0.158583	7.24152	-1.89317	0.0626256	0.999858	-4.10304
RZPDp9027B1719Q	PPP2R1A	RZPDp9027B1719Q	-0.191708	7.71657	-1.89281	0.062675	0.999858	-4.10333
RZPDp9027N239Q	PLPP3	RZPDp9027N239Q	-0.364043	9.76373	-1.89279	0.0626774	0.999858	-4.10335
RZPDp9028C2118Q	RB1CC1	RZPDp9028C2118Q	-0.250476	7.01035	-1.89129	0.0628804	0.999858	-4.10456
RZPDp9028G2315Q	U2AF1	RZPDp9028G2315Q	0.145709	7.09692	1.89077	0.0629514	0.999858	-4.10498
RZPDp9028H2219Q	RPL4	RZPDp9028H2219Q	-0.116105	6.73405	-1.88971	0.0630956	0.999858	-4.10584
RZPDp9028L2118Q	U2AF1	RZPDp9028L2118Q	0.1765	7.05848	1.88926	0.063156	0.999858	-4.1062
RZPDp9027A158Q	ZMIZ2	RZPDp9027A158Q	0.394589	9.07271	1.88867	0.0632367	0.999858	-4.10667
RZPDp9028B1611Q	TNFRSF4	RZPDp9028B1611Q	-0.106053	7.05464	-1.88837	0.063277	0.999858	-4.10691
RZPDp9028L1619Q	RPS6KA4	RZPDp9028L1619Q	-0.158368	7.24331	-1.88747	0.0634008	0.999858	-4.10764
RZPDp9028L0719Q	RPS24	RZPDp9028L0719Q	-0.154009	6.83316	-1.88561	0.0636548	0.999858	-4.10914
RZPDp9028I2118Q	SNAP23	RZPDp9028I2118Q	-0.120737	7.00443	-1.88479	0.0637676	0.999858	-4.1098
RZPDp9027G219Q	RSL1D1	RZPDp9027G219Q	-0.404184	9.36628	-1.8842	0.0638485	0.999858	-4.11028
RZPDp9028B2114Q	KIF2A	RZPDp9028B2114Q	-0.131394	7.03567	-1.88348	0.0639476	0.999858	-4.11086
RZPDp9028P0119Q	RPL10	RZPDp9028P0119Q	0.103683	6.75274	1.88281	0.0640392	0.999858	-4.11139
RZPDp9027H222Q	FBN3	RZPDp9027H222Q	-0.271959	8.77172	-1.88264	0.0640623	0.999858	-4.11153
RZPDp9028C0612Q	SNU13	RZPDp9028C0612Q	-0.141867	7.08892	-1.88188	0.0641678	0.999858	-4.11214
RZPDp9028G1815Q	LIME1	RZPDp9028G1815Q	-0.115368	7.15836	-1.88131	0.0642465	0.999858	-4.1126
RZPDp9028M1416Q	HLA-C	RZPDp9028M1416Q	0.191784	7.36551	1.88123	0.0642576	0.999858	-4.11267
RZPDp9028A1112Q	U2SURP	RZPDp9028A1112Q	-0.107075	7.03454	-1.88121	0.0642606	0.999858	-4.11268
RZPDp9027N194Q	GLRX3	RZPDp9027N194Q	0.287558	8.23663	1.88115	0.0642679	0.999858	-4.11273
RZPDp9027J0319Q	PPP2R5D	RZPDp9027J0319Q	0.148414	7.47704	1.87948	0.0644992	0.999858	-4.11407
RZPDp9028H2013Q	CCT4	RZPDp9028H2013Q	-0.312762	7.74014	-1.87677	0.064876	0.999858	-4.11625
RZPDp9028C0717Q	AKNA	RZPDp9028C0717Q	-0.171826	7.05156	-1.87669	0.064887	0.999858	-4.11631
RZPDp9028P156Q	ATP1A1	RZPDp9028P156Q	-0.207981	7.48725	-1.87634	0.0649364	0.999858	-4.11659
RZPDp9028F2414Q	TMEM65	RZPDp9028F2414Q	0.109386	6.93415	1.87315	0.065381	0.999858	-4.11915
RZPDp9028B196Q	TASOR	RZPDp9028B196Q	0.21149	7.40566	1.87207	0.0655335	0.999858	-4.12002
RZPDp9028K2317Q	EPS15L1	RZPDp9028K2317Q	-0.209852	6.83475	-1.87108	0.0656715	0.999858	-4.1208
RZPDp9027L088Q	RETREG2	RZPDp9027L088Q	-0.214433	8.60268	-1.87082	0.0657086	0.999858	-4.12101
RZPDp9027F148Q	PPHLN1	RZPDp9027F148Q	0.288097	9.94484	1.8698	0.0658526	0.999858	-4.12183
RZPDp9028M089Q	NCOA3	RZPDp9028M089Q	-0.213338	7.30279	-1.86807	0.0660971	0.999858	-4.12321
RZPDp9028E1213Q	TAPBPL	RZPDp9028E1213Q	0.178163	7.1448	1.86282	0.0668428	0.999858	-4.1274
RZPDp9027P2317Q	NUDCD3	RZPDp9027P2317Q	0.338512	7.53173	1.86264	0.0668686	0.999858	-4.12755
RZPDp9028G011Q	COL4A1	RZPDp9028G011Q	-0.11758	6.98123	-1.86191	0.0669723	0.999858	-4.12813
RZPDp9028L0918Q	HNRNPA1	RZPDp9028L0918Q	-0.206045	7.30877	-1.86179	0.06699	0.999858	-4.12822
RZPDp9028E1019Q	UPF1	RZPDp9028E1019Q	-0.103621	6.80848	-1.86135	0.067053	0.999858	-4.12857
RZPDp9028I1710Q	PDRG1	RZPDp9028I1710Q	-0.197334	7.32049	-1.86131	0.0670587	0.999858	-4.12861
RZPDp9028G202Q	LRP11	RZPDp9028G202Q	-0.223335	7.36981	-1.86121	0.0670728	0.999858	-4.12868
RZPDp9028M1713Q	NIN	RZPDp9028M1713Q	0.309504	7.68193	1.86087	0.0671219	0.999858	-4.12896
RZPDp9027P165Q	METTL3	RZPDp9027P165Q	0.315484	8.34946	1.85777	0.0675675	0.999858	-4.13143
RZPDp9028O1220Q	U2AF1	RZPDp9028O1220Q	-0.385359	8.96151	-1.85719	0.0676505	0.999858	-4.13188
RZPDp9028F0917Q	CKAP4	RZPDp9028F0917Q	-0.11018	6.99071	-1.85701	0.067677	0.999858	-4.13203
RZPDp9027F066Q	PLEKHJ1	RZPDp9027F066Q	0.283676	10.0839	1.85658	0.0677384	0.999858	-4.13237
RZPDp9028L109Q	CBR1	RZPDp9028L109Q	-0.227605	7.55032	-1.85548	0.0678973	0.999858	-4.13324
RZPDp9028P151Q	TXNDC5	RZPDp9028P151Q	-0.12008	6.92774	-1.85414	0.0680921	0.999858	-4.13431
RZPDp9028J143Q	SNAPIN	RZPDp9028J143Q	0.285912	7.72222	1.85036	0.0686411	0.999858	-4.1373
RZPDp9027M1120Q	MGRN1	RZPDp9027M1120Q	-0.190831	7.47012	-1.85028	0.0686536	0.999858	-4.13737
RZPDp9028E0619Q	TRIM28	RZPDp9028E0619Q	-0.0951707	6.7602	-1.84958	0.0687555	0.999858	-4.13792
RZPDp9028O2220Q	ARHGEF6	RZPDp9028O2220Q	-0.131776	6.81285	-1.84907	0.0688298	0.999858	-4.13833
RZPDp9027D232Q	JMJD1C	RZPDp9027D232Q	0.199197	8.59087	1.84828	0.0689459	0.999858	-4.13895
RZPDp9027B1816Q	CCDC136	RZPDp9027B1816Q	0.404409	10.6462	1.84674	0.069172	0.999858	-4.14017
RZPDp9027I0212Q	PSMD10	RZPDp9027I0212Q	0.239591	8.21101	1.84469	0.0694734	0.999858	-4.14179
RZPDp9028B2121Q	PRKAR1A	RZPDp9028B2121Q	-0.103907	6.73278	-1.84454	0.0694954	0.999858	-4.14191
RZPDp9028M2221Q	PSMB10	RZPDp9028M2221Q	-0.0974388	6.77919	-1.8435	0.0696493	0.999858	-4.14274
RZPDp9028D2012Q	HK1	RZPDp9028D2012Q	-0.134394	7.17061	-1.84333	0.069674	0.999858	-4.14287
RZPDp9028G094Q	DGCR8	RZPDp9028G094Q	-0.243348	9.24215	-1.84271	0.0697656	0.999858	-4.14336
RZPDp9027B049Q	ARMC8	RZPDp9027B049Q	0.276825	8.96366	1.8418	0.0699009	0.999858	-4.14408
RZPDp9028F0214Q	HNRNPA2B1	RZPDp9028F0214Q	-0.127808	6.9717	-1.84176	0.0699069	0.999858	-4.14411
RZPDp9027I074Q	PNMA6A	RZPDp9027I074Q	0.204207	8.77584	1.84046	0.0700994	0.999858	-4.14513
RZPDp9028L1813Q	YBX1	RZPDp9028L1813Q	0.159451	6.89271	1.83874	0.0703559	0.999858	-4.14649
RZPDp9028E2212Q	TACC3	RZPDp9028E2212Q	-0.108361	7.03264	-1.838	0.0704659	0.999858	-4.14707
RZPDp9028F0918Q	CASP8	RZPDp9028F0918Q	-0.104463	6.8458	-1.83785	0.0704885	0.999858	-4.14719
RZPDp9028G053Q	GRAMD1A	RZPDp9028G053Q	-0.191818	7.12372	-1.83526	0.0708762	0.999858	-4.14923
RZPDp9028L0820Q	HLA-B	RZPDp9028L0820Q	-0.134308	6.80266	-1.83493	0.0709264	0.999858	-4.1495
RZPDp9028E142Q	ASH1L	RZPDp9028E142Q	0.187759	7.31055	1.83397	0.0710698	0.999858	-4.15025
RZPDp9028P1019Q	HLA-E	RZPDp9028P1019Q	-0.084289	6.76964	-1.83165	0.0714197	0.999858	-4.15208
RZPDp9027G153Q	EIF3L	RZPDp9027G153Q	-0.200078	8.6226	-1.83062	0.0715757	0.999858	-4.15289
RZPDp9027G198Q	PYGB	RZPDp9027G198Q	-0.271271	9.61373	-1.82781	0.0720017	0.999858	-4.15509
RZPDp9028A168Q	MARCHF6	RZPDp9028A168Q	0.153249	7.23553	1.82572	0.0723185	0.999858	-4.15672
RZPDp9027I149Q	ZNF195	RZPDp9027I149Q	0.197606	8.07256	1.82551	0.0723512	0.999858	-4.15689
RZPDp9028G0713Q	YARS1	RZPDp9028G0713Q	-0.183721	7.2892	-1.82475	0.072467	0.999858	-4.15749
RZPDp9028D213Q	MEGF6	RZPDp9028D213Q	-0.146968	7.25022	-1.82446	0.0725116	0.999858	-4.15771
RZPDp9028P2320Q	DUT	RZPDp9028P2320Q	-0.149371	7.06502	-1.82358	0.0726457	0.999858	-4.1584
RZPDp9028D166Q	ELF3	RZPDp9028D166Q	-0.189405	7.47498	-1.82311	0.0727186	0.999858	-4.15877
RZPDp9028C1619Q	NPIPA7	RZPDp9028C1619Q	-0.0987164	6.67227	-1.82265	0.0727885	0.999858	-4.15913
RZPDp9028N1213Q	ZNF830	RZPDp9028N1213Q	0.13699	6.84359	1.82213	0.0728683	0.999858	-4.15954
RZPDp9027A1616Q	IKZF4	RZPDp9027A1616Q	0.201538	9.29166	1.82173	0.07293	0.999858	-4.15985
RZPDp9028M0611Q	IL1RN	RZPDp9028M0611Q	-0.325973	8.11032	-1.82147	0.0729693	0.999858	-4.16005
RZPDp9028O1315Q	SACS	RZPDp9028O1315Q	-0.0774944	6.69144	-1.81985	0.0732188	0.999858	-4.16132
RZPDp9028I142Q	GRK2	RZPDp9028I142Q	0.147763	7.32758	1.81968	0.0732448	0.999858	-4.16145
RZPDp9028L1420Q	RUBCN	RZPDp9028L1420Q	-0.251805	7.86978	-1.81941	0.0732875	0.999858	-4.16167
RZPDp9027B2414Q	ZFP1	RZPDp9027B2414Q	0.244362	9.47665	1.81878	0.0733846	0.999858	-4.16216
RZPDp9028L049Q	PML	RZPDp9028L049Q	-0.158667	7.4694	-1.81802	0.0735012	0.999858	-4.16275
RZPDp9028F207Q	HMGCR	RZPDp9028F207Q	-0.122282	7.13039	-1.818	0.0735041	0.999858	-4.16276
RZPDp9027A108Q	APBA2	RZPDp9027A108Q	-0.458686	9.07057	-1.81607	0.0738036	0.999858	-4.16427
RZPDp9027A156Q	RPL36AL	RZPDp9027A156Q	0.254747	8.30031	1.81323	0.0742458	0.999858	-4.16649
RZPDp9027D1817Q	TBCB	RZPDp9027D1817Q	-0.214424	8.25806	-1.81321	0.0742481	0.999858	-4.1665
RZPDp9028K051Q	PHF20L1	RZPDp9028K051Q	-0.19093	7.1721	-1.81306	0.0742721	0.999858	-4.16662
RZPDp9028H112Q	ZNF516	RZPDp9028H112Q	0.167678	6.94351	1.81153	0.0745117	0.999858	-4.16781
RZPDp9028H0419Q	GGT7	RZPDp9028H0419Q	-0.234526	7.67684	-1.81076	0.0746314	0.999858	-4.16841
RZPDp9028G1716Q	ADPGK-AS1	RZPDp9028G1716Q	0.157062	7.02803	1.80981	0.0747811	0.999858	-4.16915
RZPDp9028M2218Q	ELF1	RZPDp9028M2218Q	-0.126233	6.90167	-1.80898	0.0749106	0.999858	-4.16979
RZPDp9028I1618Q	RPL35	RZPDp9028I1618Q	-0.104784	6.84806	-1.80786	0.0750874	0.999858	-4.17067
RZPDp9028L0919Q	APBA3	RZPDp9028L0919Q	-0.202005	7.53264	-1.80602	0.0753767	0.999858	-4.17209
RZPDp9028E066Q	EIF3F	RZPDp9028E066Q	0.238877	7.51062	1.80516	0.0755122	0.999858	-4.17276
RZPDp9028P0811Q	LCOR	RZPDp9028P0811Q	-0.160759	7.15067	-1.80476	0.0755765	0.999858	-4.17307
RZPDp9028K1417Q	RPS7	RZPDp9028K1417Q	-0.270011	7.395	-1.8046	0.0756018	0.999858	-4.1732
RZPDp9028M0618Q	CREM	RZPDp9028M0618Q	-0.126043	6.8626	-1.80367	0.0757493	0.999858	-4.17392
RZPDp9028B2411Q	SNX6	RZPDp9028B2411Q	0.151752	7.09585	1.803	0.0758543	0.999858	-4.17443
RZPDp9027A0611Q	ROBO3	RZPDp9027A0611Q	0.455556	10.3041	1.80222	0.0759791	0.999858	-4.17504
RZPDp9028M1420Q	PPFIBP2	RZPDp9028M1420Q	0.150339	6.74894	1.80083	0.0762005	0.999858	-4.17612
RZPDp9028A242Q	HNRNPA0	RZPDp9028A242Q	0.108023	7.31503	1.80077	0.0762089	0.999858	-4.17616
RZPDp9028K2220Q	RBM26	RZPDp9028K2220Q	-0.106102	6.96214	-1.80061	0.0762359	0.999858	-4.17629
RZPDp9028E1511Q	FASN	RZPDp9028E1511Q	0.157519	6.95821	1.80046	0.0762593	0.999858	-4.17641
RZPDp9028E2210Q	RIPOR2	RZPDp9028E2210Q	-0.235629	7.58078	-1.80042	0.0762657	0.999858	-4.17644
RZPDp9028M1918Q	ZNF384	RZPDp9028M1918Q	-0.127998	6.95181	-1.79828	0.076608	0.999858	-4.1781
RZPDp9027A046Q	CENPT	RZPDp9027A046Q	0.276209	8.93625	1.79749	0.0767342	0.999858	-4.17871
RZPDp9027H059Q	DCAF6	RZPDp9027H059Q	-0.739168	9.0463	-1.79713	0.0767908	0.999858	-4.17898
RZPDp9027G033Q	GPC1	RZPDp9027G033Q	-0.188002	8.99349	-1.7964	0.0769081	0.999858	-4.17954
RZPDp9028C2220Q	DIAPH1	RZPDp9028C2220Q	-0.235074	8.24118	-1.7953	0.0770858	0.999858	-4.1804
RZPDp9028J0520Q	DIDO1	RZPDp9028J0520Q	-0.114303	6.86019	-1.79348	0.0773792	0.999858	-4.1818
RZPDp9027M017Q	HMGCS1	RZPDp9027M017Q	0.178756	7.1238	1.79342	0.0773891	0.999858	-4.18185
RZPDp9027C0510Q	NPIPB12	RZPDp9027C0510Q	-0.173119	7.75798	-1.79305	0.0774478	0.999858	-4.18213
RZPDp9027J145Q	PKD2L1	RZPDp9027J145Q	0.295275	9.45104	1.78985	0.0779673	0.999858	-4.1846
RZPDp9028N0210Q	DCTN2	RZPDp9028N0210Q	-0.195216	7.17061	-1.78834	0.0782124	0.999858	-4.18577
RZPDp9028C1019Q	FTH1	RZPDp9028C1019Q	-0.0876332	6.75319	-1.78789	0.0782851	0.999858	-4.18611
RZPDp9027J185Q	ERBB3	RZPDp9027J185Q	0.164213	9.39279	1.78788	0.0782868	0.999858	-4.18612
RZPDp9028M2113Q	NCOA6	RZPDp9028M2113Q	-0.16311	6.96499	-1.78786	0.0782906	0.999858	-4.18614
RZPDp9027N0619Q	SGCE	RZPDp9027N0619Q	0.184198	7.61758	1.78777	0.0783056	0.999858	-4.18621
RZPDp9028J0419Q	SPSB3	RZPDp9028J0419Q	0.119769	6.91415	1.78676	0.0784693	0.999858	-4.18698
RZPDp9028L195Q	SNRNP70	RZPDp9028L195Q	-0.156424	7.60716	-1.78641	0.0785264	0.999858	-4.18725
RZPDp9028E2414Q	CAPN2	RZPDp9028E2414Q	0.171556	6.77645	1.78552	0.0786726	0.999858	-4.18793
RZPDp9028P215Q	LMNA	RZPDp9028P215Q	-0.150225	7.32565	-1.78453	0.0788339	0.999858	-4.18869
RZPDp9027B0617Q	ARF4	RZPDp9027B0617Q	0.123334	7.43974	1.78351	0.079002	0.999858	-4.18948
RZPDp9027M0413Q	RPS3A	RZPDp9027M0413Q	0.431037	9.3442	1.78279	0.0791206	0.999858	-4.19003
RZPDp9027H061Q	PPIA	RZPDp9027H061Q	-0.207603	7.27549	-1.78248	0.0791711	0.999858	-4.19027
RZPDp9028K1715Q	HPRT1	RZPDp9028K1715Q	-0.176148	7.36958	-1.78096	0.079421	0.999858	-4.19143
RZPDp9028A0419Q	LUC7L	RZPDp9028A0419Q	0.174859	6.79238	1.78036	0.0795214	0.999858	-4.1919
RZPDp9028A0220Q	ITPKB	RZPDp9028A0220Q	0.277322	7.30306	1.77923	0.0797071	0.999858	-4.19276
RZPDp9027E143Q	SLC25A3	RZPDp9027E143Q	0.197882	8.26643	1.77726	0.0800338	0.999858	-4.19427
RZPDp9028N1912Q	AGRN	RZPDp9028N1912Q	0.157489	6.91929	1.77627	0.0801984	0.999858	-4.19503
RZPDp9028A0617Q	TLE5	RZPDp9028A0617Q	-0.168592	7.12297	-1.77415	0.0805518	0.999858	-4.19665
RZPDp9028O0421Q	FOS	RZPDp9028O0421Q	-0.0802747	6.62898	-1.77284	0.08077	0.999858	-4.19765
RZPDp9028K1518Q	TBC1D2	RZPDp9028K1518Q	-0.178466	6.64695	-1.77246	0.0808336	0.999858	-4.19794
RZPDp9027A1210Q	MLF2	RZPDp9027A1210Q	0.220324	8.32407	1.77218	0.0808815	0.999858	-4.19816
RZPDp9028O2119Q	NECAP2	RZPDp9028O2119Q	-0.120203	7.08466	-1.77194	0.0809203	0.999858	-4.19834
RZPDp9028J1016Q	COQ9	RZPDp9028J1016Q	-0.12396	6.99243	-1.77144	0.0810042	0.999858	-4.19872
RZPDp9028P1418Q	PEF1	RZPDp9028P1418Q	-0.159949	6.9671	-1.77109	0.0810637	0.999858	-4.19899
RZPDp9027I094Q	CHAMP1	RZPDp9027I094Q	0.198822	8.93146	1.77054	0.0811552	0.999858	-4.19941
RZPDp9028J0512Q	RC3H2	RZPDp9028J0512Q	-0.136964	7.27726	-1.77036	0.0811864	0.999858	-4.19955
RZPDp9027M1110Q	RPS14	RZPDp9027M1110Q	-0.249293	7.9952	-1.77035	0.0811872	0.999858	-4.19955
RZPDp9028K0918Q	PSMD4	RZPDp9028K0918Q	-0.298625	8.26659	-1.77018	0.0812166	0.999858	-4.19969
RZPDp9028P047Q	HMGN1	RZPDp9028P047Q	-0.272477	7.48339	-1.76947	0.0813352	0.999858	-4.20023
RZPDp9028D224Q	MCM5	RZPDp9028D224Q	0.276332	7.78781	1.76886	0.0814377	0.999858	-4.20069
RZPDp9027K1720Q	PKM	RZPDp9027K1720Q	-0.161384	7.27869	-1.7686	0.081482	0.999858	-4.20089
RZPDp9027M1418Q	DDOST	RZPDp9027M1418Q	0.368109	8.98113	1.76785	0.0816078	0.999858	-4.20146
RZPDp9028K0518Q	NDST2	RZPDp9028K0518Q	-0.161004	7.03577	-1.76724	0.0817115	0.999858	-4.20193
RZPDp9028F107Q	ZBTB7A	RZPDp9028F107Q	-0.219873	7.66176	-1.76648	0.08184	0.999858	-4.20251
RZPDp9027E2110Q	CORO7	RZPDp9027E2110Q	0.187322	7.76866	1.76619	0.0818888	0.999858	-4.20273
RZPDp9028K2119Q	XRCC1	RZPDp9028K2119Q	-0.112963	6.99043	-1.76613	0.0818996	0.999858	-4.20278
RZPDp9028A2318Q	NARS1	RZPDp9028A2318Q	0.171024	6.77514	1.76596	0.081928	0.999858	-4.2029
RZPDp9028O0418Q	ZNF395	RZPDp9028O0418Q	-0.110657	6.90571	-1.76524	0.082049	0.999858	-4.20345
RZPDp9028P1415Q	EHBP1L1	RZPDp9028P1415Q	-0.110614	6.7261	-1.76516	0.0820641	0.999858	-4.20351
RZPDp9028N228Q	WDR73	RZPDp9028N228Q	-0.237855	7.53689	-1.76436	0.0821988	0.999858	-4.20412
RZPDp9027N035Q	ITPA	RZPDp9027N035Q	0.238583	8.06257	1.76388	0.0822797	0.999858	-4.20448
RZPDp9028D0920Q	ERP29	RZPDp9028D0920Q	-0.264907	7.86238	-1.76305	0.082422	0.999858	-4.20512
RZPDp9028P1517Q	PHC1	RZPDp9028P1517Q	-0.0948803	6.81683	-1.76126	0.0827261	0.999858	-4.20648
RZPDp9028P153Q	STK25	RZPDp9028P153Q	0.289869	7.55374	1.76099	0.0827726	0.999858	-4.20668
RZPDp9028O1810Q	IST1	RZPDp9028O1810Q	-0.164273	7.52276	-1.76022	0.0829046	0.999858	-4.20727
RZPDp9028B0619Q	CSDE1	RZPDp9028B0619Q	-0.133939	7.12979	-1.75967	0.0829976	0.999858	-4.20768
RZPDp9027E1510Q	LRRC45	RZPDp9027E1510Q	0.212731	7.65558	1.75946	0.0830334	0.999858	-4.20784
RZPDp9027O1119Q	ZNF160	RZPDp9027O1119Q	-0.161523	7.39044	-1.75935	0.0830521	0.999858	-4.20792
RZPDp9028D1218Q	PSMD4	RZPDp9028D1218Q	-0.125966	7.07578	-1.75914	0.0830889	0.999858	-4.20809
RZPDp9028M1715Q	STAT5A	RZPDp9028M1715Q	0.117133	6.92915	1.75905	0.0831035	0.999858	-4.20815
RZPDp9027L149Q	TTC14	RZPDp9027L149Q	0.226951	7.53402	1.75884	0.0831408	0.999858	-4.20832
RZPDp9027F067Q	ZNF318	RZPDp9027F067Q	0.20112	8.58011	1.75726	0.0834119	0.999858	-4.20952
RZPDp9027J1919Q	NCL	RZPDp9027J1919Q	0.372669	7.94765	1.75568	0.0836821	0.999858	-4.21071
RZPDp9028C1912Q	MACROH2A1	RZPDp9028C1912Q	0.15234	7.09185	1.75526	0.0837548	0.999858	-4.21103
RZPDp9028J1920Q	STK38	RZPDp9028J1920Q	-0.206547	6.84607	-1.75287	0.0841676	0.999858	-4.21284
RZPDp9028M183Q	ZNF346	RZPDp9028M183Q	0.131763	7.36563	1.75272	0.0841936	0.999858	-4.21295
RZPDp9028P1710Q	CHKB	RZPDp9028P1710Q	-0.0979505	6.92838	-1.75186	0.0843427	0.999858	-4.2136
RZPDp9028G1910Q	TRMT1	RZPDp9028G1910Q	-0.161233	7.3033	-1.75131	0.0844381	0.999858	-4.21402
RZPDp9028H1717Q	YPEL3	RZPDp9028H1717Q	-0.145775	6.96737	-1.75025	0.0846234	0.999858	-4.21482
RZPDp9028B1516Q	POLR2L	RZPDp9028B1516Q	-0.0997002	6.77425	-1.74997	0.0846709	0.999858	-4.21503
RZPDp9028O2218Q	ZC3H12A	RZPDp9028O2218Q	-0.173252	7.21504	-1.74987	0.0846892	0.999858	-4.21511
RZPDp9028L0617Q	RPS27	RZPDp9028L0617Q	-0.134258	6.96655	-1.74907	0.0848278	0.999858	-4.21571
RZPDp9028B0213Q	COX6B1	RZPDp9028B0213Q	-0.132418	7.10939	-1.74893	0.0848525	0.999858	-4.21582
RZPDp9028A0818Q	PSMB1	RZPDp9028A0818Q	0.226409	7.05519	1.74821	0.0849775	0.999858	-4.21636
RZPDp9028A0321Q	SAFB	RZPDp9028A0321Q	0.0910909	6.68738	1.74642	0.0852899	0.999858	-4.21771
RZPDp9028N2217Q	STX11	RZPDp9028N2217Q	-0.293331	7.7618	-1.74579	0.0854014	0.999858	-4.21819
RZPDp9028O1011Q	NAB1	RZPDp9028O1011Q	-0.174391	7.30195	-1.74521	0.0855021	0.999858	-4.21862
RZPDp9027I051Q	KIFAP3	RZPDp9027I051Q	0.25694	8.93064	1.74515	0.0855128	0.999858	-4.21867
RZPDp9028I152Q	HSPB1	RZPDp9028I152Q	0.144564	7.19902	1.745	0.0855399	0.999858	-4.21879
RZPDp9028D0319Q	ANXA1	RZPDp9028D0319Q	-0.125403	6.96973	-1.74387	0.0857369	0.999858	-4.21963
RZPDp9028I207Q	NUP205	RZPDp9028I207Q	-0.085515	7.01505	-1.74382	0.0857471	0.999858	-4.21968
RZPDp9027J023Q	ASB13	RZPDp9027J023Q	0.183106	8.72065	1.74373	0.0857618	0.999858	-4.21974
RZPDp9027M1918Q	RHOT1	RZPDp9027M1918Q	0.304654	9.10783	1.74172	0.0861156	0.999858	-4.22125
RZPDp9027E058Q	EEF1B2	RZPDp9027E058Q	0.172688	8.25892	1.74081	0.0862765	0.999858	-4.22194
RZPDp9027A2116Q	CUL7	RZPDp9027A2116Q	0.34781	9.08233	1.7404	0.0863494	0.999858	-4.22225
RZPDp9027E086Q	CFDP1	RZPDp9027E086Q	0.271606	9.40098	1.74035	0.0863583	0.999858	-4.22229
RZPDp9028M1012Q	MICAL3	RZPDp9028M1012Q	-0.128235	7.0694	-1.74008	0.0864066	0.999858	-4.22249
RZPDp9028N1017Q	PRKCA	RZPDp9028N1017Q	-0.132555	7.16453	-1.73914	0.0865721	0.999858	-4.22319
RZPDp9028D042Q	PXN	RZPDp9028D042Q	-0.116977	7.11607	-1.73888	0.0866176	0.999858	-4.22339
RZPDp9028B107Q	NBPF11	RZPDp9028B107Q	-0.264297	8.01217	-1.73849	0.0866874	0.999858	-4.22368
RZPDp9028F1016Q	JUNB	RZPDp9028F1016Q	-0.11634	7.02592	-1.73784	0.0868034	0.999858	-4.22417
RZPDp9028D0512Q	IRF4	RZPDp9028D0512Q	-0.116328	7.07209	-1.73732	0.0868943	0.999858	-4.22456
RZPDp9028G2114Q	CALU	RZPDp9028G2114Q	-0.182942	7.20507	-1.73671	0.0870043	0.999858	-4.22502
RZPDp9027O1915Q	MARS1	RZPDp9027O1915Q	-0.241476	9.6929	-1.73649	0.0870419	0.999858	-4.22518
RZPDp9028I032Q	ANXA6	RZPDp9028I032Q	0.189471	7.53815	1.73537	0.0872422	0.999858	-4.22603
RZPDp9027I1714Q	ACTN2	RZPDp9027I1714Q	0.185642	7.78942	1.7348	0.0873441	0.999858	-4.22645
RZPDp9027L0310Q	FRA10AC1	RZPDp9027L0310Q	-0.233535	9.511	-1.73389	0.0875056	0.999858	-4.22713
RZPDp9027I1120Q	THOC3	RZPDp9027I1120Q	-0.143799	7.25487	-1.73369	0.0875429	0.999858	-4.22729
RZPDp9028K1921Q	GLYR1	RZPDp9028K1921Q	-0.101177	6.78226	-1.7336	0.0875587	0.999858	-4.22735
RZPDp9027K0812Q	SMG6	RZPDp9027K0812Q	-0.190585	8.77353	-1.73276	0.0877085	0.999858	-4.22798
RZPDp9028P1014Q	AATF	RZPDp9028P1014Q	-0.139966	7.09942	-1.73225	0.0878005	0.999858	-4.22837
RZPDp9028A172Q	SH2B2	RZPDp9028A172Q	0.315449	8.54755	1.73214	0.0878189	0.999858	-4.22844
RZPDp9027L228Q	HNRNPA2B1	RZPDp9027L228Q	-0.206597	8.51963	-1.73183	0.0878756	0.999858	-4.22868
RZPDp9028L207Q	MED4	RZPDp9028L207Q	-0.17587	7.33958	-1.7303	0.0881495	0.999858	-4.22982
RZPDp9028M0218Q	SH3KBP1	RZPDp9028M0218Q	0.146149	6.84633	1.73026	0.0881572	0.999858	-4.22985
RZPDp9028H086Q	IL2RG	RZPDp9028H086Q	-0.219685	7.55446	-1.72951	0.0882915	0.999858	-4.23041
RZPDp9028H176Q	GRN	RZPDp9028H176Q	-0.20705	7.53583	-1.7295	0.0882939	0.999858	-4.23042
RZPDp9027B027Q	USF2	RZPDp9027B027Q	0.250246	8.97694	1.72876	0.0884269	0.999858	-4.23097
RZPDp9027I153Q	WDR13	RZPDp9027I153Q	0.175668	8.29043	1.72875	0.0884297	0.999858	-4.23099
RZPDp9028D2411Q	USP11	RZPDp9028D2411Q	0.123635	6.97797	1.72854	0.0884669	0.999858	-4.23114
RZPDp9028F2120Q	RPS13	RZPDp9028F2120Q	-0.411774	10.0236	-1.72827	0.0885146	0.999858	-4.23134
RZPDp9028J0817Q	MED10	RZPDp9028J0817Q	0.101169	7.04747	1.72811	0.0885438	0.999858	-4.23146
RZPDp9027J0519Q	RNF40	RZPDp9027J0519Q	0.222652	7.84027	1.72754	0.0886467	0.999858	-4.23189
RZPDp9028I0210Q	MYO9B	RZPDp9028I0210Q	0.0930014	7.0057	1.7274	0.0886729	0.999858	-4.23199
RZPDp9027A216Q	LAMP1	RZPDp9027A216Q	0.224545	8.95773	1.72729	0.0886919	0.999858	-4.23207
RZPDp9028A0320Q	TNRC6B	RZPDp9028A0320Q	0.119395	6.8735	1.72703	0.0887401	0.999858	-4.23227
RZPDp9028M1913Q	KDM5D	RZPDp9028M1913Q	0.47287	8.31581	1.72694	0.0887552	0.999858	-4.23233
RZPDp9027B128Q	HGS	RZPDp9027B128Q	0.266371	9.42184	1.72684	0.0887747	0.999858	-4.23241
RZPDp9027B1711Q	CREM	RZPDp9027B1711Q	0.280287	9.26184	1.72552	0.0890135	0.999858	-4.2334
RZPDp9028P0110Q	KMT2C	RZPDp9028P0110Q	0.163269	7.15787	1.72497	0.0891124	0.999858	-4.23381
RZPDp9028O0914Q	HLA-B	RZPDp9028O0914Q	-0.145426	7.16056	-1.72418	0.0892558	0.999858	-4.2344
RZPDp9028A124Q	HBB	RZPDp9028A124Q	0.216555	8.11663	1.72202	0.0896487	0.999858	-4.23601
RZPDp9028C2114Q	PPIP5K1	RZPDp9028C2114Q	-0.182432	7.25349	-1.72057	0.0899134	0.999858	-4.23709
RZPDp9028I182Q	SARNP	RZPDp9028I182Q	0.167614	7.33175	1.72	0.090018	0.999858	-4.23751
RZPDp9027G1814Q	ODF2	RZPDp9027G1814Q	-0.164585	9.83786	-1.71882	0.0902334	0.999858	-4.23839
RZPDp9027I034Q	LRP3	RZPDp9027I034Q	0.300606	8.92711	1.71831	0.0903284	0.999858	-4.23877
RZPDp9027K1814Q	PEBP1	RZPDp9027K1814Q	-0.179903	9.68919	-1.71816	0.090355	0.999858	-4.23888
RZPDp9028D1910Q	SGTA	RZPDp9028D1910Q	-0.255968	7.62582	-1.71791	0.0904004	0.999858	-4.23906
RZPDp9027E196Q	ASPSCR1	RZPDp9027E196Q	0.433054	8.59073	1.71514	0.0909108	0.999858	-4.24113
RZPDp9028P1819Q	XPO4	RZPDp9028P1819Q	-0.0927051	6.89855	-1.71365	0.0911865	0.999858	-4.24223
RZPDp9028E0114Q	ENO1	RZPDp9028E0114Q	0.12084	7.09168	1.71331	0.0912481	0.999858	-4.24248
RZPDp9027A172Q	HNRNPK	RZPDp9027A172Q	0.228965	8.19167	1.71248	0.0914017	0.999858	-4.2431
RZPDp9028L038Q	CCND2	RZPDp9028L038Q	-0.344968	8.02544	-1.71242	0.0914134	0.999858	-4.24314
RZPDp9028C0814Q	DDOST	RZPDp9028C0814Q	-0.175896	7.55582	-1.71136	0.0916106	0.999858	-4.24393
RZPDp9027D046Q	ZFP36L1	RZPDp9027D046Q	0.246871	8.60923	1.71011	0.0918427	0.999858	-4.24486
RZPDp9028O1718Q	HLA-B	RZPDp9028O1718Q	-0.105986	6.87435	-1.70927	0.0919988	0.999858	-4.24548
RZPDp9028O075Q	EEF1A1	RZPDp9028O075Q	-0.183247	8.02944	-1.70901	0.0920463	0.999858	-4.24567
RZPDp9028K0110Q	CDKAL1	RZPDp9028K0110Q	-0.0982503	7.2141	-1.70881	0.0920839	0.999858	-4.24582
RZPDp9027A199Q	ARHGEF1	RZPDp9027A199Q	0.236843	8.60363	1.70878	0.0920903	0.999858	-4.24584
RZPDp9027F177Q	SUCLG1	RZPDp9027F177Q	0.173619	8.30456	1.70794	0.092246	0.999858	-4.24646
RZPDp9027A0419Q	ZNF738	RZPDp9027A0419Q	0.229803	7.83505	1.70782	0.0922682	0.999858	-4.24655
RZPDp9027F027Q	ADGRB2	RZPDp9027F027Q	0.265088	8.70681	1.70755	0.09232	0.999858	-4.24675
RZPDp9028J102Q	ZNF394	RZPDp9028J102Q	-0.1513	7.35422	-1.70749	0.092331	0.999858	-4.2468
RZPDp9028G0910Q	SAP18	RZPDp9028G0910Q	-0.13201	7.23611	-1.70633	0.0925473	0.999858	-4.24765
RZPDp9028J214Q	PHKB	RZPDp9028J214Q	-0.211608	8.529	-1.70535	0.0927304	0.999858	-4.24837
RZPDp9028K214Q	ITPKB	RZPDp9028K214Q	-0.145818	7.3286	-1.705	0.0927972	0.999858	-4.24864
RZPDp9027E094Q	PPM1B	RZPDp9027E094Q	0.291626	8.59475	1.70461	0.0928703	0.999858	-4.24893
RZPDp9027J195Q	CRIP2	RZPDp9027J195Q	0.225816	9.10734	1.70398	0.0929889	0.999858	-4.24939
RZPDp9027J126Q	NSDHL	RZPDp9027J126Q	0.202598	8.55543	1.70295	0.0931823	0.999858	-4.25015
RZPDp9028O1112Q	KARS1	RZPDp9028O1112Q	-0.222071	7.15287	-1.70192	0.0933752	0.999858	-4.25091
RZPDp9027C168Q	PLCG1	RZPDp9027C168Q	-0.712948	8.75253	-1.70159	0.0934383	0.999858	-4.25115
RZPDp9027O229Q	MYT1	RZPDp9027O229Q	-0.267607	8.71762	-1.70149	0.0934564	0.999858	-4.25122
RZPDp9027J0517Q	DGCR2	RZPDp9027J0517Q	-0.16329	7.99883	-1.70134	0.0934856	0.999858	-4.25134
RZPDp9027D018Q	FEZ1	RZPDp9027D018Q	-0.0792191	6.35117	-1.70105	0.0935407	0.999858	-4.25155
RZPDp9028G101Q	NOSIP	RZPDp9028G101Q	-0.184442	8.06712	-1.70095	0.0935578	0.999858	-4.25162
RZPDp9028D072Q	CBFA2T2	RZPDp9028D072Q	-0.104105	7.21988	-1.6993	0.0938706	0.999858	-4.25284
RZPDp9028P1216Q	TMC6	RZPDp9028P1216Q	-0.363352	8.70852	-1.69741	0.0942291	0.999858	-4.25423
RZPDp9027I106Q	EZR	RZPDp9027I106Q	0.173872	8.88206	1.69695	0.094316	0.999858	-4.25457
RZPDp9027B089Q	KHDRBS1	RZPDp9027B089Q	0.165899	8.08876	1.69662	0.0943799	0.999858	-4.25482
RZPDp9027A104Q	LPAR2	RZPDp9027A104Q	0.132901	9.90339	1.69658	0.0943865	0.999858	-4.25484
RZPDp9027C219Q	RPL12	RZPDp9027C219Q	-0.240276	8.34123	-1.69621	0.0944568	0.999858	-4.25511
RZPDp9027N021Q	SNRNP200	RZPDp9027N021Q	0.324352	8.43366	1.69587	0.0945219	0.999858	-4.25536
RZPDp9028G027Q	PTK2B	RZPDp9028G027Q	-0.169068	7.17582	-1.69442	0.0947981	0.999858	-4.25643
RZPDp9028E2115Q	FCHSD1	RZPDp9028E2115Q	-0.191322	7.58475	-1.69397	0.0948838	0.999858	-4.25676
RZPDp9028I2119Q	PECAM1	RZPDp9028I2119Q	-0.16199	7.34816	-1.69342	0.0949887	0.999858	-4.25716
RZPDp9027E189Q	SETD2	RZPDp9027E189Q	0.304134	10.1312	1.69308	0.0950547	0.999858	-4.25742
RZPDp9028F141Q	EPS8L2	RZPDp9028F141Q	0.173588	7.2603	1.69245	0.0951741	0.999858	-4.25787
RZPDp9028L063Q	LAD1	RZPDp9028L063Q	-0.138391	7.05949	-1.69228	0.0952078	0.999858	-4.258
RZPDp9027D148Q	SH3BP5	RZPDp9027D148Q	0.248779	7.92275	1.69228	0.0952079	0.999858	-4.258
RZPDp9028N0918Q	HPRT1	RZPDp9028N0918Q	-0.144462	6.98307	-1.69221	0.0952211	0.999858	-4.25805
RZPDp9028D0312Q	ARFIP2	RZPDp9028D0312Q	-0.135367	7.11714	-1.69139	0.0953773	0.999858	-4.25865
RZPDp9028M143Q	BRF2	RZPDp9028M143Q	0.1837	7.64844	1.69085	0.0954826	0.999858	-4.25905
RZPDp9027C238Q	DPYSL3	RZPDp9027C238Q	-0.304496	8.62472	-1.69073	0.0955048	0.999858	-4.25914
RZPDp9028I0212Q	CAT	RZPDp9028I0212Q	0.206577	7.08561	1.68939	0.095763	0.999858	-4.26012
RZPDp9028C0517Q	ZNF777	RZPDp9028C0517Q	-0.226353	7.55799	-1.68925	0.0957903	0.999858	-4.26023
RZPDp9028F044Q	SPTAN1	RZPDp9028F044Q	-0.249481	8.36337	-1.68883	0.0958698	0.999858	-4.26053
RZPDp9028P1312Q	MRTO4	RZPDp9028P1312Q	-0.245673	7.53509	-1.68869	0.0958978	0.999858	-4.26064
RZPDp9028K148Q	PAICS	RZPDp9028K148Q	-0.170528	7.41481	-1.6851	0.0965918	0.999858	-4.26326
RZPDp9028K2120Q	SBF1	RZPDp9028K2120Q	-0.235388	7.98921	-1.6839	0.0968237	0.999858	-4.26414
RZPDp9027D056Q	BCLAF1	RZPDp9027D056Q	0.322827	8.42382	1.68347	0.0969067	0.999858	-4.26445
RZPDp9028G1021Q	IL16	RZPDp9028G1021Q	-0.116601	6.81606	-1.68337	0.0969275	0.999858	-4.26453
RZPDp9028P171Q	COL6A3	RZPDp9028P171Q	-0.0904418	7.03684	-1.68332	0.0969374	0.999858	-4.26457
RZPDp9027I1510Q	CYCS	RZPDp9027I1510Q	0.129674	7.45106	1.68295	0.0970092	0.999858	-4.26484
RZPDp9027A0711Q	C1orf122	RZPDp9027A0711Q	0.259066	9.03248	1.68293	0.0970114	0.999858	-4.26484
RZPDp9028F1014Q	CWF19L2	RZPDp9028F1014Q	-0.171612	7.22838	-1.68261	0.0970747	0.999858	-4.26508
RZPDp9028B0615Q	PPP1R15A	RZPDp9028B0615Q	-0.120871	7.09489	-1.6823	0.0971351	0.999858	-4.26531
RZPDp9027G141Q	CUX1	RZPDp9027G141Q	0.155391	7.7092	1.68213	0.0971685	0.999858	-4.26543
RZPDp9028C0414Q	ITK	RZPDp9028C0414Q	-0.278256	7.47384	-1.68124	0.0973424	0.999858	-4.26608
RZPDp9027N195Q	AAMP	RZPDp9027N195Q	0.261609	8.86684	1.68122	0.097345	0.999858	-4.26609
RZPDp9027A064Q	TMEM131	RZPDp9027A064Q	0.18043	8.48027	1.68077	0.0974332	0.999858	-4.26642
RZPDp9028A0916Q	PLAUR	RZPDp9028A0916Q	-0.112499	7.05492	-1.68044	0.0974984	0.999858	-4.26667
RZPDp9028I1813Q	IRF5	RZPDp9028I1813Q	-0.103066	6.85074	-1.67993	0.097597	0.999858	-4.26704
RZPDp9028N2213Q	DDX54	RZPDp9028N2213Q	-0.166602	7.08612	-1.67936	0.0977081	0.999858	-4.26745
RZPDp9028A065Q	C1QBP	RZPDp9028A065Q	0.37112	7.4256	1.67895	0.0977892	0.999858	-4.26775
RZPDp9027H054Q	MED21	RZPDp9027H054Q	0.313078	8.1237	1.67843	0.0978904	0.999858	-4.26813
RZPDp9028M1712Q	IRF8	RZPDp9028M1712Q	-0.114801	6.90196	-1.67778	0.0980183	0.999858	-4.2686
RZPDp9027B034Q	FDPS	RZPDp9027B034Q	0.190618	8.25308	1.67764	0.0980455	0.999858	-4.2687
RZPDp9027H0918Q	IST1	RZPDp9027H0918Q	-0.211798	7.80074	-1.67762	0.098049	0.999858	-4.26872
RZPDp9028C1411Q	VPS36	RZPDp9028C1411Q	-0.0747191	6.97607	-1.67412	0.0987383	0.999858	-4.27127
RZPDp9028N2012Q	MEA1	RZPDp9028N2012Q	-0.180585	7.22209	-1.67368	0.0988262	0.999858	-4.27159
RZPDp9028E2418Q	ZNF574	RZPDp9028E2418Q	0.189927	7.00194	1.67328	0.0989038	0.999858	-4.27188
RZPDp9028M0818Q	OGA	RZPDp9028M0818Q	-0.0876452	6.85613	-1.67317	0.0989258	0.999858	-4.27196
RZPDp9027I195Q	PHC2	RZPDp9027I195Q	0.147192	7.91994	1.67317	0.0989258	0.999858	-4.27196
RZPDp9028I1311Q	ACLY	RZPDp9028I1311Q	0.101562	6.99354	1.67046	0.0994632	0.999858	-4.27393
RZPDp9028I0917Q	SETD2	RZPDp9028I0917Q	-0.0997853	6.87068	-1.66981	0.0995921	0.999858	-4.2744
RZPDp9027J1915Q	MN1	RZPDp9027J1915Q	0.345484	9.77516	1.6694	0.0996729	0.999858	-4.27469
RZPDp9028J043Q	VPS18	RZPDp9028J043Q	0.133154	7.59463	1.6687	0.0998126	0.999858	-4.2752
RZPDp9028H2112Q	ETV6	RZPDp9028H2112Q	-0.115717	7.1242	-1.66862	0.0998283	0.999858	-4.27526
RZPDp9028C0411Q	RASAL3	RZPDp9028C0411Q	-0.155392	7.06141	-1.66843	0.0998674	0.999858	-4.2754
RZPDp9027B097Q	MTDH	RZPDp9027B097Q	0.189096	9.10388	1.66752	0.100048	0.999858	-4.27606
RZPDp9027G1415Q	RABL6	RZPDp9027G1415Q	-0.255681	9.6244	-1.66718	0.100115	0.999858	-4.2763
RZPDp9027H152Q	RBM39	RZPDp9027H152Q	0.19084	8.95672	1.66717	0.100117	0.999858	-4.27631
RZPDp9028L176Q	MYH11	RZPDp9028L176Q	-0.197915	7.54264	-1.66674	0.100203	0.999858	-4.27662
RZPDp9028M0616Q	TENT5C	RZPDp9028M0616Q	-0.174998	7.22871	-1.66673	0.100205	0.999858	-4.27663
RZPDp9028O233Q	AHNAK	RZPDp9028O233Q	-0.111469	7.23665	-1.66653	0.100245	0.999858	-4.27677
RZPDp9027E186Q	SAP30BP	RZPDp9027E186Q	0.240573	9.93725	1.66617	0.100318	0.999858	-4.27704
RZPDp9027E0810Q	IDH2	RZPDp9027E0810Q	-0.163207	7.99772	-1.66599	0.100353	0.999858	-4.27717
RZPDp9028J0416Q	TBCC	RZPDp9028J0416Q	0.103045	7.02869	1.66518	0.100515	0.999858	-4.27775
RZPDp9028O0820Q	RPL3	RZPDp9028O0820Q	-0.189638	7.39436	-1.66437	0.100678	0.999858	-4.27834
RZPDp9027L096Q	MRTO4	RZPDp9027L096Q	-0.210849	9.16488	-1.66404	0.100745	0.999858	-4.27858
RZPDp9028K0417Q	CRTC2	RZPDp9028K0417Q	-0.136029	6.93955	-1.66396	0.10076	0.999858	-4.27863
RZPDp9028L0520Q	EHMT1	RZPDp9028L0520Q	-0.268609	8.06535	-1.66364	0.100823	0.999858	-4.27886
RZPDp9028O0219Q	ARID1B	RZPDp9028O0219Q	-0.102079	6.90947	-1.66346	0.10086	0.999858	-4.27899
RZPDp9028C0618Q	MCM3	RZPDp9028C0618Q	-0.191973	7.334	-1.66219	0.101115	0.999858	-4.27991
RZPDp9028F2419Q	MOB2	RZPDp9028F2419Q	0.113972	6.88769	1.66192	0.101171	0.999858	-4.28011
RZPDp9027D089Q	TTYH3	RZPDp9027D089Q	-0.212001	9.06219	-1.66089	0.101378	0.999858	-4.28085
RZPDp9028I1219Q	RPL19	RZPDp9028I1219Q	0.135986	6.8638	1.66088	0.10138	0.999858	-4.28086
RZPDp9028D0318Q	P4HB	RZPDp9028D0318Q	-0.105101	6.73255	-1.65942	0.101675	0.999858	-4.28192
RZPDp9028L0511Q	ZC3H12A	RZPDp9028L0511Q	-0.139863	7.0903	-1.65903	0.101754	0.999858	-4.2822
RZPDp9028C064Q	NR4A1	RZPDp9028C064Q	-0.237451	8.77884	-1.65775	0.102013	0.999858	-4.28312
RZPDp9027C0120Q	PKD5	RZPDp9027C0120Q	-0.141095	7.07907	-1.65657	0.102251	0.999858	-4.28397
RZPDp9027N0513Q	WDR73	RZPDp9027N0513Q	0.214581	8.6677	1.65498	0.102575	0.999858	-4.28512
RZPDp9027I1616Q	DRAXIN	RZPDp9027I1616Q	0.368125	9.13739	1.6545	0.102672	0.999858	-4.28546
RZPDp9028A1612Q	ARHGEF3	RZPDp9028A1612Q	-0.169865	6.94086	-1.65406	0.102763	0.999858	-4.28578
RZPDp9027K215Q	SSBP3	RZPDp9027K215Q	0.147271	9.07749	1.65352	0.102873	0.999858	-4.28617
RZPDp9028M1419Q	CCDC88C	RZPDp9028M1419Q	-0.112928	6.76848	-1.65281	0.103018	0.999858	-4.28668
RZPDp9028I2421Q	TESK1	RZPDp9028I2421Q	0.0726021	6.72408	1.65238	0.103105	0.999858	-4.28698
RZPDp9028F2220Q	ZNF598	RZPDp9028F2220Q	-0.121126	6.72017	-1.65213	0.103155	0.999858	-4.28716
RZPDp9028G0417Q	FAM50A	RZPDp9028G0417Q	-0.124621	6.7045	-1.65193	0.103198	0.999858	-4.28731
RZPDp9028D165Q	MACF1	RZPDp9028D165Q	-0.196418	7.25823	-1.65161	0.103262	0.999858	-4.28754
RZPDp9028N1318Q	OTUB1	RZPDp9028N1318Q	-0.215264	6.99454	-1.65102	0.103384	0.999858	-4.28796
RZPDp9028J0319Q	FYN	RZPDp9028J0319Q	0.142442	6.95429	1.65082	0.103424	0.999858	-4.2881
RZPDp9028N185Q	TUFT1	RZPDp9028N185Q	-0.210386	7.72259	-1.64948	0.103698	0.999858	-4.28906
RZPDp9028B222Q	GON4L	RZPDp9028B222Q	-0.184151	7.68395	-1.64884	0.10383	0.999858	-4.28952
RZPDp9028G1818Q	SELL	RZPDp9028G1818Q	-0.107858	6.92104	-1.64757	0.104091	0.999858	-4.29043
RZPDp9028O2213Q	RPAP2	RZPDp9028O2213Q	-0.108155	7.00169	-1.64708	0.104193	0.999858	-4.29079
RZPDp9028O0215Q	GSTK1	RZPDp9028O0215Q	-0.199088	7.87451	-1.64684	0.104243	0.999858	-4.29096
RZPDp9028H081Q	PLEKHA4	RZPDp9028H081Q	-0.157533	7.29184	-1.64645	0.104322	0.999858	-4.29124
RZPDp9028C2121Q	KARS1	RZPDp9028C2121Q	-0.0884371	6.71562	-1.64612	0.104391	0.999858	-4.29148
RZPDp9027P147Q	DMTN	RZPDp9027P147Q	0.279936	7.75881	1.64444	0.104739	0.999858	-4.29268
RZPDp9027C021Q	ST3GAL3	RZPDp9027C021Q	0.210349	7.28701	1.64382	0.104868	0.999858	-4.29312
RZPDp9027P2410Q	PSMD4	RZPDp9027P2410Q	0.438378	8.99625	1.64292	0.105053	0.999858	-4.29376
RZPDp9028G0913Q	PFKP	RZPDp9028G0913Q	-0.123718	7.29849	-1.64277	0.105085	0.999858	-4.29387
RZPDp9028K1019Q	MARK3	RZPDp9028K1019Q	-0.0908491	6.72646	-1.64244	0.105154	0.999858	-4.29411
RZPDp9027L0918Q	WDR18	RZPDp9027L0918Q	-0.208939	8.33865	-1.64242	0.105158	0.999858	-4.29413
RZPDp9027A0319Q	EIF4A2	RZPDp9027A0319Q	0.412848	8.44283	1.64218	0.105207	0.999858	-4.29429
RZPDp9027N053Q	SCARB2	RZPDp9027N053Q	0.22357	8.42039	1.64205	0.105234	0.999858	-4.29439
RZPDp9028P1812Q	ZNF700	RZPDp9028P1812Q	-0.223949	7.68851	-1.64166	0.105316	0.999858	-4.29467
RZPDp9028H0814Q	CCNDBP1	RZPDp9028H0814Q	-0.190051	7.36541	-1.64133	0.105384	0.999858	-4.2949
RZPDp9028M0914Q	MAP4	RZPDp9028M0914Q	-0.120821	6.92542	-1.64103	0.105447	0.999858	-4.29512
RZPDp9027H097Q	B4GALT2	RZPDp9027H097Q	-0.17977	7.89886	-1.64054	0.105548	0.999858	-4.29547
RZPDp9028I1817Q	IKBKB	RZPDp9028I1817Q	-0.135342	7.00281	-1.64036	0.105585	0.999858	-4.29559
RZPDp9027G056Q	SCG3	RZPDp9027G056Q	0.225173	8.89361	1.63999	0.105663	0.999858	-4.29586
RZPDp9027G062Q	RTN4	RZPDp9027G062Q	0.271869	9.72466	1.6399	0.105681	0.999858	-4.29592
RZPDp9028A0610Q	ACIN1	RZPDp9028A0610Q	-0.0903762	7.01086	-1.63984	0.105695	0.999858	-4.29597
RZPDp9028C0310Q	KDM3B	RZPDp9028C0310Q	-0.108292	7.09579	-1.63937	0.105793	0.999858	-4.2963
RZPDp9028D085Q	KAT8	RZPDp9028D085Q	-0.17226	8.08716	-1.63894	0.105883	0.999858	-4.29661
RZPDp9028K0318Q	PRPS1	RZPDp9028K0318Q	-0.121837	7.10745	-1.63824	0.106029	0.999858	-4.29711
RZPDp9028E0917Q	EVL	RZPDp9028E0917Q	-0.109415	6.98784	-1.63796	0.106088	0.999858	-4.29731
RZPDp9028H1916Q	PTPRC	RZPDp9028H1916Q	-0.127576	6.93865	-1.63732	0.106222	0.999858	-4.29777
RZPDp9028B0516Q	RCSD1	RZPDp9028B0516Q	-0.129752	7.28121	-1.63683	0.106324	0.999858	-4.29812
RZPDp9027E172Q	CHMP1B	RZPDp9027E172Q	0.230914	8.88483	1.63671	0.106349	0.999858	-4.2982
RZPDp9027C0720Q	SNRPN	RZPDp9027C0720Q	-0.189238	7.77036	-1.63621	0.106454	0.999858	-4.29856
RZPDp9028P2213Q	ZNF263	RZPDp9028P2213Q	-0.282342	8.05691	-1.63608	0.106481	0.999858	-4.29865
RZPDp9028O104Q	KRT19	RZPDp9028O104Q	-0.160839	7.35906	-1.63505	0.106697	0.999858	-4.29938
RZPDp9028P0520Q	VIM	RZPDp9028P0520Q	-0.158844	6.83749	-1.63498	0.106712	0.999858	-4.29943
RZPDp9027L1316Q	L1CAM	RZPDp9027L1316Q	-0.187423	7.6077	-1.63481	0.106748	0.999858	-4.29956
RZPDp9028P247Q	ETS1	RZPDp9028P247Q	0.212698	7.66644	1.63391	0.106936	0.999858	-4.30019
RZPDp9028C2211Q	IRF4	RZPDp9028C2211Q	-0.16074	7.13504	-1.63299	0.10713	0.999858	-4.30085
RZPDp9028H1613Q	FKBP15	RZPDp9028H1613Q	-0.130338	7.49701	-1.63225	0.107287	0.999858	-4.30137
RZPDp9027A1214Q	NFX1	RZPDp9027A1214Q	0.256325	9.94834	1.63118	0.107513	0.999858	-4.30213
RZPDp9028P2010Q	HSP90AA1	RZPDp9028P2010Q	-0.164386	7.23409	-1.63075	0.107604	0.999858	-4.30244
RZPDp9028E2112Q	ISOC1	RZPDp9028E2112Q	-0.094196	6.88691	-1.63069	0.107618	0.999858	-4.30249
RZPDp9028G1413Q	ADGRE5	RZPDp9028G1413Q	-0.16253	7.16777	-1.62961	0.107846	0.999858	-4.30325
RZPDp9028H1616Q	FKBP1A	RZPDp9028H1616Q	-0.132077	6.89236	-1.62849	0.108083	0.999858	-4.30405
RZPDp9028I0913Q	IL16	RZPDp9028I0913Q	-0.0697903	6.91367	-1.62844	0.108093	0.999858	-4.30408
RZPDp9028O162Q	SP1	RZPDp9028O162Q	-0.108384	7.02733	-1.62756	0.10828	0.999858	-4.3047
RZPDp9028P0214Q	EZH2	RZPDp9028P0214Q	-0.127148	6.926	-1.62735	0.108325	0.999858	-4.30485
RZPDp9028D0121Q	LCK	RZPDp9028D0121Q	-0.1497	7.47144	-1.62727	0.108342	0.999858	-4.30491
RZPDp9027I1210Q	TMOD3	RZPDp9027I1210Q	0.163159	7.52564	1.62701	0.108398	0.999858	-4.30509
RZPDp9028N0116Q	DAG1	RZPDp9028N0116Q	0.171285	7.21078	1.62661	0.108483	0.999858	-4.30538
RZPDp9028L0219Q	CAPRIN2	RZPDp9028L0219Q	-0.144304	6.80743	-1.62626	0.108558	0.999858	-4.30563
RZPDp9028N0212Q	KAT7	RZPDp9028N0212Q	-0.0828402	6.99955	-1.62551	0.108717	0.999858	-4.30616
RZPDp9028I2012Q	MYO5A	RZPDp9028I2012Q	-0.307352	8.58609	-1.62516	0.108792	0.999858	-4.3064
RZPDp9028A1610Q	DUS1L	RZPDp9028A1610Q	-0.119765	7.03971	-1.62394	0.109052	0.999858	-4.30727
RZPDp9028C2411Q	TXNIP	RZPDp9028C2411Q	0.23587	7.6041	1.62379	0.109086	0.999858	-4.30738
RZPDp9028B2414Q	TREX1	RZPDp9028B2414Q	0.13835	6.99579	1.62371	0.109103	0.999858	-4.30744
RZPDp9028M0413Q	IRF9	RZPDp9028M0413Q	-0.118558	6.90172	-1.62324	0.109203	0.999858	-4.30777
RZPDp9028G2118Q	SERBP1	RZPDp9028G2118Q	-0.100451	6.80873	-1.62185	0.109501	0.999858	-4.30875
RZPDp9027G1117Q	CNKSR2	RZPDp9027G1117Q	-0.201268	8.45295	-1.62176	0.109521	0.999858	-4.30882
RZPDp9028D0714Q	RFX5	RZPDp9028D0714Q	-0.23052	7.21209	-1.62153	0.109569	0.999858	-4.30897
RZPDp9028B2113Q	HIF1A	RZPDp9028B2113Q	-0.275335	7.31666	-1.62151	0.109575	0.999858	-4.30899
RZPDp9028B1011Q	ABHD14B	RZPDp9028B1011Q	-0.122339	7.18362	-1.6214	0.109597	0.999858	-4.30906
RZPDp9028N203Q	MAPK15	RZPDp9028N203Q	-0.110368	7.24012	-1.62062	0.109765	0.999858	-4.30962
RZPDp9028P2214Q	CD200	RZPDp9028P2214Q	-0.226873	7.72033	-1.62028	0.109839	0.999858	-4.30986
RZPDp9027A0412Q	SCG3	RZPDp9027A0412Q	0.378671	9.09259	1.62027	0.10984	0.999858	-4.30986
RZPDp9027A1911Q	AGPAT1	RZPDp9027A1911Q	0.254737	9.0109	1.6201	0.109876	0.999858	-4.30998
RZPDp9028O1418Q	DNAAF2	RZPDp9028O1418Q	-0.117194	6.91791	-1.62001	0.109896	0.999858	-4.31005
RZPDp9028A1915Q	NOB1	RZPDp9028A1915Q	0.123276	7.14882	1.6196	0.109985	0.999858	-4.31034
RZPDp9028H0919Q	EGFL8	RZPDp9028H0919Q	-0.111234	6.93358	-1.61935	0.110038	0.999858	-4.31051
RZPDp9028G038Q	DNAJA1	RZPDp9028G038Q	-0.209741	7.77151	-1.61913	0.110087	0.999858	-4.31067
RZPDp9027B244Q	TTYH3	RZPDp9027B244Q	0.18305	9.06472	1.61894	0.110127	0.999858	-4.3108
RZPDp9028K218Q	ATP5F1A	RZPDp9028K218Q	-0.19774	7.75995	-1.61878	0.110161	0.999858	-4.31092
RZPDp9028J1211Q	ACIN1	RZPDp9028J1211Q	0.250314	7.06345	1.61834	0.110256	0.999858	-4.31123
RZPDp9028L1117Q	GIMAP1	RZPDp9028L1117Q	-0.155504	6.84128	-1.61734	0.110472	0.999858	-4.31193
RZPDp9028F037Q	RPF1	RZPDp9028F037Q	-0.131212	7.36963	-1.6169	0.110567	0.999858	-4.31224
RZPDp9027J217Q	RAB14	RZPDp9027J217Q	0.161459	8.61257	1.61683	0.110582	0.999858	-4.31229
RZPDp9028J2313Q	MRPS34	RZPDp9028J2313Q	-0.278519	8.02908	-1.61523	0.110929	0.999858	-4.31342
RZPDp9027E2318Q	PJA1	RZPDp9027E2318Q	0.201503	7.76885	1.61496	0.110989	0.999858	-4.31361
RZPDp9027F229Q	PSMB4	RZPDp9027F229Q	-0.214218	7.88077	-1.61463	0.11106	0.999858	-4.31384
RZPDp9028M0521Q	LOC728392	RZPDp9028M0521Q	-0.0629812	6.66078	-1.61447	0.111095	0.999858	-4.31396
RZPDp9028F2014Q	FKBP4	RZPDp9028F2014Q	0.124593	7.06621	1.61441	0.111107	0.999858	-4.314
RZPDp9028A2020Q	VAX2	RZPDp9028A2020Q	0.137643	6.78855	1.61427	0.111138	0.999858	-4.3141
RZPDp9028H1016Q	EXOSC1	RZPDp9028H1016Q	-0.168959	7.01026	-1.61413	0.111168	0.999858	-4.3142
RZPDp9028M033Q	MED16	RZPDp9028M033Q	0.117952	7.20468	1.6141	0.111174	0.999858	-4.31421
RZPDp9028M1820Q	UQCRC1	RZPDp9028M1820Q	0.240059	6.83946	1.61302	0.11141	0.999858	-4.31498
RZPDp9028J0820Q	ID2	RZPDp9028J0820Q	-0.1012	6.75345	-1.61205	0.111621	0.999858	-4.31566
RZPDp9028C035Q	PKD1	RZPDp9028C035Q	-0.182447	8.0135	-1.61098	0.111853	0.999858	-4.31641
RZPDp9028B1416Q	PSMA1	RZPDp9028B1416Q	-0.113848	6.95085	-1.61015	0.112036	0.999858	-4.31699
RZPDp9027A179Q	HNRNPC	RZPDp9027A179Q	0.178309	7.98752	1.61003	0.112061	0.999858	-4.31708
RZPDp9027H1417Q	ADD2	RZPDp9027H1417Q	0.111129	6.97245	1.60949	0.11218	0.999858	-4.31746
RZPDp9028K023Q	TADA3	RZPDp9028K023Q	-0.0808024	7.04808	-1.6094	0.1122	0.999858	-4.31752
RZPDp9028K139Q	HLA-B	RZPDp9028K139Q	-0.197769	7.22385	-1.60904	0.112279	0.999858	-4.31778
RZPDp9028O106Q	MAP7D1	RZPDp9028O106Q	-0.176111	7.44011	-1.60689	0.11275	0.999858	-4.31928
RZPDp9027K1510Q	PPP2R2B	RZPDp9027K1510Q	-0.134713	7.69714	-1.60677	0.112777	0.999858	-4.31937
RZPDp9028P201Q	MAF1	RZPDp9028P201Q	-0.404129	8.74812	-1.60598	0.11295	0.999858	-4.31992
RZPDp9027F1719Q	RBMS1	RZPDp9027F1719Q	0.265821	8.37254	1.60518	0.113126	0.999858	-4.32048
RZPDp9027A1510Q	ADAP1	RZPDp9027A1510Q	0.151592	7.48364	1.60456	0.113263	0.999858	-4.32092
RZPDp9027F178Q	SEPTIN3	RZPDp9027F178Q	0.267741	9.83058	1.60235	0.113752	0.999858	-4.32246
RZPDp9027A219Q	ARID5A	RZPDp9027A219Q	0.205749	8.88775	1.60133	0.113978	0.999858	-4.32318
RZPDp9028F247Q	TTLL12	RZPDp9028F247Q	0.127227	6.96031	1.60097	0.114058	0.999858	-4.32343
RZPDp9028I0611Q	CORO2A	RZPDp9028I0611Q	0.0776989	6.92891	1.60072	0.114113	0.999858	-4.3236
RZPDp9028A206Q	SPTBN1	RZPDp9028A206Q	-0.349877	7.91862	-1.59961	0.11436	0.999858	-4.32438
RZPDp9027H2010Q	PRPF6	RZPDp9027H2010Q	-0.200389	9.28471	-1.59892	0.114512	0.999858	-4.32486
RZPDp9028B0618Q	HNRNPD	RZPDp9028B0618Q	0.0703529	6.77291	1.59876	0.114548	0.999858	-4.32497
RZPDp9028A1712Q	DCTN5	RZPDp9028A1712Q	-0.102387	7.16205	-1.59874	0.114552	0.999858	-4.32498
RZPDp9028B0117Q	PKN1	RZPDp9028B0117Q	0.110351	6.89894	1.59869	0.114564	0.999858	-4.32502
RZPDp9028H2220Q	ZC3H11A	RZPDp9028H2220Q	-0.06994	6.74488	-1.59857	0.11459	0.999858	-4.3251
RZPDp9028H1918Q	POLK	RZPDp9028H1918Q	-0.126627	6.86706	-1.59814	0.114687	0.999858	-4.32541
RZPDp9028N1519Q	BICDL1	RZPDp9028N1519Q	-0.268186	7.37466	-1.59805	0.114706	0.999858	-4.32547
RZPDp9028L1514Q	FPGS	RZPDp9028L1514Q	-0.139095	7.1874	-1.59764	0.114798	0.999858	-4.32575
RZPDp9027D109Q	PFKP	RZPDp9027D109Q	-0.202528	8.86519	-1.59723	0.11489	0.999858	-4.32604
RZPDp9028K0319Q	KAT2A	RZPDp9028K0319Q	-0.0950855	6.86917	-1.59702	0.114936	0.999858	-4.32619
RZPDp9027N225Q	NAXE	RZPDp9027N225Q	-0.220434	8.74365	-1.59678	0.114988	0.999858	-4.32635
RZPDp9028D1415Q	SETD2	RZPDp9028D1415Q	0.143695	6.99942	1.59619	0.115121	0.999858	-4.32676
RZPDp9028J0717Q	COX7A2L	RZPDp9028J0717Q	0.129968	6.9878	1.59603	0.115158	0.999858	-4.32688
RZPDp9028M0520Q	HCG4B	RZPDp9028M0520Q	0.140829	6.76336	1.59558	0.115257	0.999858	-4.32719
RZPDp9028N0512Q	AHCYL1	RZPDp9028N0512Q	-0.169405	7.13685	-1.59538	0.115303	0.999858	-4.32733
RZPDp9028A2114Q	PUM3	RZPDp9028A2114Q	0.162495	7.31132	1.59523	0.115337	0.999858	-4.32744
RZPDp9027F026Q	USP33	RZPDp9027F026Q	0.309737	8.99395	1.59466	0.115464	0.999858	-4.32783
RZPDp9027G115Q	H2AW	RZPDp9027G115Q	-0.190923	8.78199	-1.59334	0.11576	0.999858	-4.32875
RZPDp9027K018Q	NIP7	RZPDp9027K018Q	-0.191406	7.88104	-1.59208	0.116042	0.999858	-4.32962
RZPDp9028G172Q	CCN2	RZPDp9028G172Q	-0.130945	7.11877	-1.59194	0.116075	0.999858	-4.32972
RZPDp9028G205Q	ELF3	RZPDp9028G205Q	-0.249656	9.57203	-1.59159	0.116153	0.999858	-4.32997
RZPDp9028G0212Q	NOL8	RZPDp9028G0212Q	-0.0763388	7.00484	-1.59111	0.116262	0.999858	-4.3303
RZPDp9028P241Q	FOXK1	RZPDp9028P241Q	-0.132416	7.14886	-1.59098	0.116291	0.999858	-4.33039
RZPDp9028H1319Q	PPT1	RZPDp9028H1319Q	0.106235	6.95466	1.59051	0.116396	0.999858	-4.33072
RZPDp9028M1513Q	CPLANE1	RZPDp9028M1513Q	0.0779971	6.90495	1.58961	0.1166	0.999858	-4.33134
RZPDp9027H2215Q	GPI	RZPDp9027H2215Q	-0.17656	8.79695	-1.58923	0.116684	0.999858	-4.3316
RZPDp9028P0618Q	DDX52	RZPDp9028P0618Q	-0.0884493	6.85404	-1.58815	0.116929	0.999858	-4.33235
RZPDp9027J0619Q	HNRNPH1	RZPDp9027J0619Q	0.270629	8.9199	1.58808	0.116946	0.999858	-4.33241
RZPDp9028P164Q	CNMD	RZPDp9028P164Q	-0.137227	7.86576	-1.58805	0.116951	0.999858	-4.33242
RZPDp9028J0818Q	PRPF4B	RZPDp9028J0818Q	-0.106093	6.88185	-1.58771	0.117028	0.999858	-4.33266
RZPDp9028F2315Q	ARHGAP4	RZPDp9028F2315Q	-0.214684	7.54156	-1.58615	0.117383	0.999858	-4.33374
RZPDp9028E102Q	C1QB	RZPDp9028E102Q	-0.106954	7.55731	-1.58587	0.117445	0.999858	-4.33393
RZPDp9028I103Q	NCOR2	RZPDp9028I103Q	-0.275684	7.33706	-1.58555	0.11752	0.999858	-4.33416
RZPDp9028O147Q	SH3GLB2	RZPDp9028O147Q	-0.149718	7.51727	-1.58537	0.11756	0.999858	-4.33429
RZPDp9028E0621Q	RPL10A	RZPDp9028E0621Q	-0.317238	7.81562	-1.5848	0.11769	0.999858	-4.33468
RZPDp9027M077Q	TALDO1	RZPDp9027M077Q	0.253926	9.01556	1.58403	0.117865	0.999858	-4.33521
RZPDp9027F1713Q	RPS2	RZPDp9027F1713Q	0.236312	9.08676	1.58366	0.117948	0.999858	-4.33547
RZPDp9027J1111Q	PLEKHA7	RZPDp9027J1111Q	-0.175594	8.12046	-1.58329	0.118034	0.999858	-4.33573
RZPDp9027N058Q	ZMYND8	RZPDp9027N058Q	0.218155	9.29574	1.58312	0.118072	0.999858	-4.33584
RZPDp9027G079Q	NSMF	RZPDp9027G079Q	-0.319353	9.10083	-1.5831	0.118076	0.999858	-4.33586
RZPDp9027E036Q	OLFM2	RZPDp9027E036Q	0.295154	9.25879	1.58304	0.118091	0.999858	-4.3359
RZPDp9028I0911Q	MSN	RZPDp9028I0911Q	-0.101588	7.01395	-1.58258	0.118194	0.999858	-4.33621
RZPDp9028C0613Q	IDH3B	RZPDp9028C0613Q	-0.200238	7.72291	-1.58197	0.118335	0.999858	-4.33664
RZPDp9027D2217Q	UBAP2L	RZPDp9027D2217Q	-0.177915	8.88837	-1.58098	0.118561	0.999858	-4.33732
RZPDp9028K2320Q	POC5	RZPDp9028K2320Q	-0.19696	7.65979	-1.58094	0.11857	0.999858	-4.33735
RZPDp9027B2216Q	DBN1	RZPDp9027B2216Q	0.325675	9.21751	1.58079	0.118605	0.999858	-4.33746
RZPDp9027H218Q	ZNF334	RZPDp9027H218Q	-0.170215	8.63129	-1.58021	0.118738	0.999858	-4.33786
RZPDp9027F1815Q	PCID2	RZPDp9027F1815Q	0.349506	9.42446	1.57995	0.118797	0.999858	-4.33804
RZPDp9027M125Q	GTF2F1	RZPDp9027M125Q	0.178103	7.87819	1.5793	0.118945	0.999858	-4.33848
RZPDp9028I157Q	TNNC1	RZPDp9028I157Q	0.165701	7.31046	1.57841	0.119151	0.999858	-4.3391
RZPDp9027E1212Q	ZBTB45	RZPDp9027E1212Q	0.188598	8.1816	1.57836	0.11916	0.999858	-4.33913
RZPDp9028O088Q	FAM98A	RZPDp9028O088Q	-0.181922	7.67403	-1.5771	0.119452	0.999858	-4.34
RZPDp9027O0218Q	BCS1L	RZPDp9027O0218Q	-0.112607	7.47158	-1.57583	0.119743	0.999858	-4.34087
RZPDp9028F1012Q	CARM1	RZPDp9028F1012Q	-0.147849	7.33032	-1.57583	0.119744	0.999858	-4.34088
RZPDp9027C048Q	TSR2	RZPDp9027C048Q	0.2544	8.02848	1.57517	0.119896	0.999858	-4.34133
RZPDp9027A062Q	SYT3	RZPDp9027A062Q	0.296328	9.49276	1.57499	0.119938	0.999858	-4.34146
RZPDp9028E1115Q	IRF8	RZPDp9028E1115Q	-0.144637	6.99086	-1.57488	0.119962	0.999858	-4.34153
RZPDp9027N193Q	OGT	RZPDp9027N193Q	0.159467	8.37526	1.57475	0.119992	0.999858	-4.34162
RZPDp9028H0220Q	MBD1	RZPDp9028H0220Q	-0.191086	7.85632	-1.5747	0.120005	0.999858	-4.34166
RZPDp9028M0411Q	GTF2H2C	RZPDp9028M0411Q	-0.134432	7.0568	-1.57365	0.120249	0.999858	-4.34238
RZPDp9027A038Q	SPTBN2	RZPDp9027A038Q	0.361729	9.44125	1.57188	0.120659	0.999858	-4.3436
RZPDp9027A076Q	INTS10	RZPDp9027A076Q	0.261198	9.27792	1.57162	0.120719	0.999858	-4.34378
RZPDp9028I0618Q	EEF1B2	RZPDp9028I0618Q	-0.166761	6.8474	-1.57102	0.120858	0.999858	-4.34419
RZPDp9027M163Q	MAGED1	RZPDp9027M163Q	0.188388	7.99982	1.5709	0.120886	0.999858	-4.34427
RZPDp9028C0219Q	RAPGEF2	RZPDp9028C0219Q	-0.102194	6.66488	-1.57029	0.121026	0.999858	-4.34469
RZPDp9028D0216Q	NFKBIA	RZPDp9028D0216Q	-0.19416	7.03893	-1.57003	0.121087	0.999858	-4.34487
RZPDp9027I144Q	TUBB2B	RZPDp9027I144Q	0.194073	9.29221	1.56989	0.121121	0.999858	-4.34497
RZPDp9028I1819Q	UNC13B	RZPDp9028I1819Q	-0.125841	6.95218	-1.56927	0.121264	0.999858	-4.34539
RZPDp9027M1512Q	NUDC	RZPDp9027M1512Q	0.116731	7.67375	1.56898	0.121331	0.999858	-4.34559
RZPDp9028O0912Q	RPSA	RZPDp9028O0912Q	-0.264325	7.53004	-1.56786	0.121593	0.999858	-4.34636
RZPDp9027P1014Q	RPL24	RZPDp9027P1014Q	-0.22081	9.75859	-1.56784	0.121599	0.999858	-4.34637
RZPDp9028B229Q	KHNYN	RZPDp9028B229Q	-0.205884	7.98794	-1.56771	0.121628	0.999858	-4.34646
RZPDp9027C208Q	POLR2J2	RZPDp9027C208Q	-0.230645	8.91437	-1.56729	0.121728	0.999858	-4.34675
RZPDp9027J025Q	MPP3	RZPDp9027J025Q	0.224516	9.2415	1.56724	0.121739	0.999858	-4.34678
RZPDp9028G2210Q	IK	RZPDp9028G2210Q	-0.205537	7.7801	-1.56696	0.121803	0.999858	-4.34697
RZPDp9027K0418Q	TOP2B	RZPDp9027K0418Q	-0.125091	7.58903	-1.56653	0.121905	0.999858	-4.34727
RZPDp9028L108Q	LDHA	RZPDp9028L108Q	-0.196374	7.73023	-1.56648	0.121917	0.999858	-4.34731
RZPDp9027I0219Q	MCRS1	RZPDp9027I0219Q	0.479933	9.31988	1.56623	0.121974	0.999858	-4.34747
RZPDp9028M1211Q	PNPT1	RZPDp9028M1211Q	0.131909	7.14925	1.5662	0.121982	0.999858	-4.3475
RZPDp9027I1517Q	NOL3	RZPDp9027I1517Q	0.291783	8.47625	1.56567	0.122106	0.999858	-4.34786
RZPDp9028E1515Q	PRDX3	RZPDp9028E1515Q	-0.115511	6.9525	-1.56467	0.122339	0.999858	-4.34854
RZPDp9028N0516Q	ADI1	RZPDp9028N0516Q	-0.113222	7.38727	-1.56387	0.122529	0.999858	-4.3491
RZPDp9028K0912Q	SBF1	RZPDp9028K0912Q	-0.165124	7.43897	-1.5632	0.122685	0.999858	-4.34955
RZPDp9027E148Q	TCF25	RZPDp9027E148Q	0.197483	8.22563	1.56302	0.122728	0.999858	-4.34968
RZPDp9027M072Q	ANKZF1	RZPDp9027M072Q	0.31389	9.20096	1.56282	0.122774	0.999858	-4.34981
RZPDp9028N1914Q	GIMAP5	RZPDp9028N1914Q	-0.139812	6.95371	-1.56277	0.122787	0.999858	-4.34985
RZPDp9028J107Q	PKD1	RZPDp9028J107Q	-0.157925	7.46015	-1.56224	0.122911	0.999858	-4.35021
RZPDp9028M0714Q	SLC3A2	RZPDp9028M0714Q	-0.230493	7.51491	-1.5619	0.12299	0.999858	-4.35044
RZPDp9028M039Q	THOP1	RZPDp9028M039Q	0.537782	8.1953	1.56157	0.123069	0.999858	-4.35067
RZPDp9028J087Q	PEX5	RZPDp9028J087Q	-0.188262	7.49773	-1.56086	0.123238	0.999858	-4.35116
RZPDp9028J141Q	PA2G4	RZPDp9028J141Q	0.16028	7.75183	1.56072	0.12327	0.999858	-4.35125
RZPDp9027I125Q	RBBP4	RZPDp9027I125Q	0.165339	8.0825	1.56044	0.123335	0.999858	-4.35144
RZPDp9028D059Q	NFX1	RZPDp9028D059Q	-0.220861	7.85476	-1.56041	0.123342	0.999858	-4.35146
RZPDp9028P0611Q	RNF213	RZPDp9028P0611Q	0.109301	6.78521	1.56011	0.123414	0.999858	-4.35166
RZPDp9028D148Q	RPS2	RZPDp9028D148Q	0.149491	7.22898	1.55991	0.123461	0.999858	-4.3518
RZPDp9027O1114Q	TUBGCP3	RZPDp9027O1114Q	-0.259089	9.98338	-1.55961	0.123533	0.999858	-4.35201
RZPDp9028P079Q	TNFRSF4	RZPDp9028P079Q	-0.232059	8.02987	-1.55913	0.123645	0.999858	-4.35233
RZPDp9028I101Q	OS9	RZPDp9028I101Q	-0.0947669	7.03818	-1.55715	0.124114	0.999858	-4.35368
RZPDp9028E065Q	FN1	RZPDp9028E065Q	0.127153	7.24123	1.55693	0.124167	0.999858	-4.35383
RZPDp9028D0818Q	CAPN2	RZPDp9028D0818Q	-0.116538	6.83327	-1.55668	0.124226	0.999858	-4.354
RZPDp9027A1613Q	PLXNB1	RZPDp9027A1613Q	0.312048	8.13158	1.55643	0.124286	0.999858	-4.35418
RZPDp9028P086Q	NT5C2	RZPDp9028P086Q	-0.171533	7.56726	-1.55607	0.124371	0.999858	-4.35442
RZPDp9028M2217Q	HMGB2	RZPDp9028M2217Q	0.108663	6.87168	1.55577	0.124443	0.999858	-4.35463
RZPDp9028P1920Q	FNBP4	RZPDp9028P1920Q	-0.11814	6.82107	-1.55544	0.124522	0.999858	-4.35485
RZPDp9027A182Q	PIGK	RZPDp9027A182Q	0.203108	8.59285	1.55487	0.124658	0.999858	-4.35524
RZPDp9028H079Q	OTUD6B	RZPDp9028H079Q	-0.151549	7.46283	-1.55421	0.124813	0.999858	-4.35569
RZPDp9027A045Q	MYCBP2	RZPDp9027A045Q	0.142172	8.17249	1.55374	0.124926	0.999858	-4.35601
RZPDp9027I076Q	CDK16	RZPDp9027I076Q	0.272617	8.94971	1.55232	0.125265	0.999858	-4.35697
RZPDp9028E2021Q	LMNA	RZPDp9028E2021Q	-0.112358	6.71389	-1.55215	0.125307	0.999858	-4.35709
RZPDp9028B1511Q	RBM12	RZPDp9028B1511Q	-0.133344	7.02177	-1.55189	0.125368	0.999858	-4.35726
RZPDp9028D1818Q	PPP1CA	RZPDp9028D1818Q	-0.170695	6.84455	-1.55136	0.125496	0.999858	-4.35763
RZPDp9027N188Q	TIAM2	RZPDp9027N188Q	0.304392	9.47044	1.55094	0.125596	0.999858	-4.35791
RZPDp9028J0518Q	SIRT7	RZPDp9028J0518Q	-0.108783	6.91378	-1.55089	0.125607	0.999858	-4.35794
RZPDp9028O0821Q	RPL9	RZPDp9028O0821Q	-0.360718	9.66841	-1.55056	0.125688	0.999858	-4.35817
RZPDp9028P2115Q	HLA-A	RZPDp9028P2115Q	-0.132393	7.26548	-1.55026	0.125758	0.999858	-4.35837
RZPDp9028L1920Q	ABL1	RZPDp9028L1920Q	-0.0911688	6.75707	-1.54927	0.125997	0.999858	-4.35905
RZPDp9028N096Q	DVL2	RZPDp9028N096Q	0.19103	7.66831	1.54904	0.126051	0.999858	-4.3592
RZPDp9028P0218Q	RASSF3	RZPDp9028P0218Q	-0.130516	6.6913	-1.5488	0.12611	0.999858	-4.35937
RZPDp9028G2112Q	GPR108	RZPDp9028G2112Q	-0.189986	7.50989	-1.54774	0.126364	0.999858	-4.36008
RZPDp9028L1919Q	ARHGAP30	RZPDp9028L1919Q	-0.129898	6.80979	-1.54766	0.126384	0.999858	-4.36014
RZPDp9028H1314Q	TBC1D17	RZPDp9028H1314Q	-0.238329	7.60298	-1.5469	0.126566	0.999858	-4.36065
RZPDp9027I056Q	DUSP12	RZPDp9027I056Q	0.338667	8.36671	1.54646	0.126674	0.999858	-4.36095
RZPDp9028O0115Q	PSAT1	RZPDp9028O0115Q	-0.100805	6.64212	-1.54598	0.126788	0.999858	-4.36128
RZPDp9028N099Q	RIC8A	RZPDp9028N099Q	-0.204913	7.88492	-1.54556	0.126891	0.999858	-4.36157
RZPDp9028L2319Q	ARHGEF1	RZPDp9028L2319Q	0.106969	6.67743	1.5454	0.126928	0.999858	-4.36167
RZPDp9027B019Q	HNRNPDL	RZPDp9027B019Q	0.189578	7.82777	1.54448	0.12715	0.999858	-4.36229
RZPDp9027M129Q	FTH1	RZPDp9027M129Q	0.332927	9.29766	1.5444	0.12717	0.999858	-4.36235
RZPDp9028E1520Q	CDKN1B	RZPDp9028E1520Q	0.0939488	6.68448	1.5434	0.127414	0.999858	-4.36303
RZPDp9028K1712Q	NOTCH2	RZPDp9028K1712Q	-0.107676	6.9443	-1.54338	0.127417	0.999858	-4.36304
RZPDp9028P214Q	SH3GLB2	RZPDp9028P214Q	-0.192212	8.89834	-1.5431	0.127485	0.999858	-4.36323
RZPDp9028L1616Q	RPS15A	RZPDp9028L1616Q	-0.122436	7.00233	-1.54299	0.127513	0.999858	-4.3633
RZPDp9027E2019Q	TSPAN8	RZPDp9027E2019Q	0.127539	7.64476	1.54287	0.127541	0.999858	-4.36338
RZPDp9027I0615Q	UTP3	RZPDp9027I0615Q	0.323411	10.107	1.54265	0.127594	0.999858	-4.36353
RZPDp9027C1111Q	TPM1	RZPDp9027C1111Q	-0.144863	7.89808	-1.54244	0.127646	0.999858	-4.36367
RZPDp9028H1119Q	TUBGCP3	RZPDp9028H1119Q	0.140336	6.6634	1.54126	0.127933	0.999858	-4.36447
RZPDp9028H2214Q	AFG3L2	RZPDp9028H2214Q	-0.149414	7.1109	-1.54054	0.128107	0.999858	-4.36496
RZPDp9028I147Q	EXOSC7	RZPDp9028I147Q	0.201719	7.60572	1.54027	0.128173	0.999858	-4.36514
RZPDp9028K1015Q	KAT5	RZPDp9028K1015Q	-0.12037	7.2083	-1.54024	0.12818	0.999858	-4.36516
RZPDp9028K0210Q	LTA4H	RZPDp9028K0210Q	-0.121278	7.36984	-1.54013	0.128207	0.999858	-4.36523
RZPDp9028J2411Q	NOMO2	RZPDp9028J2411Q	0.128213	7.03105	1.54006	0.128225	0.999858	-4.36528
RZPDp9028P054Q	ERF	RZPDp9028P054Q	-0.227725	8.58528	-1.53996	0.128249	0.999858	-4.36535
RZPDp9027B1611Q	ITM2C	RZPDp9027B1611Q	0.416393	10.1945	1.53994	0.128252	0.999858	-4.36536
RZPDp9028C189Q	TAP1	RZPDp9028C189Q	0.21859	7.7229	1.53966	0.128321	0.999858	-4.36555
RZPDp9028H0719Q	HNRNPA1	RZPDp9028H0719Q	-0.105758	6.85827	-1.53933	0.128403	0.999858	-4.36578
RZPDp9028M231Q	LTBP4	RZPDp9028M231Q	-0.114446	6.86439	-1.53918	0.128439	0.999858	-4.36588
RZPDp9027M094Q	ULK2	RZPDp9027M094Q	0.16946	9.53756	1.53915	0.128446	0.999858	-4.3659
RZPDp9028A1416Q	DDX21	RZPDp9028A1416Q	0.132166	6.99193	1.53901	0.128481	0.999858	-4.36599
RZPDp9028P107Q	KDM6B	RZPDp9028P107Q	-0.191775	7.74869	-1.5385	0.128604	0.999858	-4.36633
RZPDp9027B178Q	RASD1	RZPDp9027B178Q	0.232819	10.0147	1.5383	0.128653	0.999858	-4.36647
RZPDp9028I217Q	PNMA1	RZPDp9028I217Q	-0.165377	7.4092	-1.5381	0.128702	0.999858	-4.3666
RZPDp9028E1211Q	BSDC1	RZPDp9028E1211Q	0.144377	7.2258	1.53787	0.128758	0.999858	-4.36676
RZPDp9027C0316Q	MAP3K4	RZPDp9027C0316Q	-0.237217	8.60164	-1.53744	0.128863	0.999858	-4.36705
RZPDp9027A034Q	SGK1	RZPDp9027A034Q	0.323362	8.04771	1.53706	0.128956	0.999858	-4.36731
RZPDp9027P219Q	MAP1B	RZPDp9027P219Q	-0.449252	8.93709	-1.5367	0.129046	0.999858	-4.36755
RZPDp9028A0614Q	NEU1	RZPDp9028A0614Q	-0.103732	7.10926	-1.53667	0.129051	0.999858	-4.36757
RZPDp9027J1719Q	ANKIB1	RZPDp9027J1719Q	0.258932	8.65458	1.53627	0.12915	0.999858	-4.36784
RZPDp9028P209Q	RASSF2	RZPDp9028P209Q	-0.154476	7.63788	-1.5355	0.129339	0.999858	-4.36836
RZPDp9028O2411Q	LRRC8B	RZPDp9028O2411Q	0.190436	6.88007	1.53492	0.129482	0.999858	-4.36875
RZPDp9028B2116Q	RCL1	RZPDp9028B2116Q	-0.186746	7.30798	-1.53488	0.12949	0.999858	-4.36877
RZPDp9027G1510Q	CXXC1	RZPDp9027G1510Q	0.256331	9.09073	1.53486	0.129496	0.999858	-4.36879
RZPDp9027E037Q	AHSG	RZPDp9027E037Q	0.154097	7.63249	1.53483	0.129503	0.999858	-4.36881
RZPDp9028L0414Q	SLC4A1AP	RZPDp9028L0414Q	-0.120891	7.06713	-1.53478	0.129516	0.999858	-4.36884
RZPDp9027B198Q	PPP5C	RZPDp9027B198Q	0.283175	9.92995	1.53319	0.129905	0.999858	-4.36991
RZPDp9028L1416Q	TNRC18	RZPDp9028L1416Q	-0.153017	7.14337	-1.53232	0.130119	0.999858	-4.37049
RZPDp9027N052Q	NAA10	RZPDp9027N052Q	0.203603	8.82896	1.53218	0.130154	0.999858	-4.37059
RZPDp9028N1619Q	WBP2	RZPDp9028N1619Q	0.185608	7.21232	1.53196	0.130208	0.999858	-4.37074
RZPDp9028P174Q	EPS8L2	RZPDp9028P174Q	-0.198143	9.0942	-1.53179	0.130251	0.999858	-4.37085
RZPDp9028N0818Q	RPS10	RZPDp9028N0818Q	-0.210042	7.66339	-1.53149	0.130326	0.999858	-4.37106
RZPDp9027G015Q	GLS2	RZPDp9027G015Q	-0.161723	8.24965	-1.53058	0.13055	0.999858	-4.37167
RZPDp9028P087Q	SLX1A	RZPDp9028P087Q	-0.227566	7.5943	-1.53008	0.130673	0.999858	-4.372
RZPDp9027M2018Q	ANAPC16	RZPDp9027M2018Q	0.250372	8.93623	1.52976	0.130753	0.999858	-4.37222
RZPDp9028M0712Q	LLGL1	RZPDp9028M0712Q	-0.259995	7.27958	-1.52875	0.131003	0.999858	-4.3729
RZPDp9028M1711Q	MCM2	RZPDp9028M1711Q	-0.183691	7.68806	-1.52825	0.131127	0.999858	-4.37323
RZPDp9028E1212Q	MARS1	RZPDp9028E1212Q	0.103773	6.87923	1.52803	0.131182	0.999858	-4.37338
RZPDp9028D0811Q	NOP56	RZPDp9028D0811Q	-0.142641	7.30419	-1.52798	0.131193	0.999858	-4.37341
RZPDp9028E0421Q	KRI1	RZPDp9028E0421Q	-0.147345	6.8034	-1.52792	0.131207	0.999858	-4.37345
RZPDp9028D183Q	CCN2	RZPDp9028D183Q	-0.121076	7.31735	-1.52739	0.131341	0.999858	-4.37381
RZPDp9028M1619Q	HEBP2	RZPDp9028M1619Q	-0.0727447	6.7139	-1.52716	0.131398	0.999858	-4.37396
RZPDp9028N105Q	TGFB1I1	RZPDp9028N105Q	-0.244555	8.18807	-1.52663	0.13153	0.999858	-4.37432
RZPDp9028I0716Q	NOP53	RZPDp9028I0716Q	-0.117365	6.90447	-1.52553	0.131801	0.999858	-4.37505
RZPDp9027M154Q	MCM6	RZPDp9027M154Q	0.22509	7.99898	1.5251	0.13191	0.999858	-4.37534
RZPDp9028I0621Q	MAPK6	RZPDp9028I0621Q	-0.0926004	6.65535	-1.52499	0.131938	0.999858	-4.37542
RZPDp9028K1516Q	PPP5C	RZPDp9028K1516Q	-0.181729	7.13432	-1.52492	0.131954	0.999858	-4.37546
RZPDp9027M219Q	MPST	RZPDp9027M219Q	-0.352084	8.39125	-1.52422	0.132129	0.999858	-4.37593
RZPDp9028C0920Q	CALM3	RZPDp9028C0920Q	-0.0745573	6.72202	-1.52395	0.132196	0.999858	-4.37611
RZPDp9027A084Q	ACLY	RZPDp9027A084Q	0.305875	8.33788	1.52365	0.132272	0.999858	-4.37631
RZPDp9027N185Q	WDR5	RZPDp9027N185Q	0.194241	9.45481	1.52332	0.132354	0.999858	-4.37653
RZPDp9028C101Q	THRA	RZPDp9028C101Q	-0.0908885	7.05034	-1.52238	0.132588	0.999858	-4.37716
RZPDp9028A2411Q	RPS15A	RZPDp9028A2411Q	0.144406	7.37811	1.52238	0.132589	0.999858	-4.37716
RZPDp9028A015Q	IK	RZPDp9028A015Q	0.19716	7.29443	1.52165	0.132772	0.999858	-4.37765
RZPDp9028L0811Q	CSTB	RZPDp9028L0811Q	-0.0843034	7.00807	-1.52158	0.132789	0.999858	-4.37769
RZPDp9028J037Q	MSN	RZPDp9028J037Q	-0.175985	7.57339	-1.51906	0.13342	0.999858	-4.37937
RZPDp9028M152Q	FBXO44	RZPDp9028M152Q	0.113228	7.27445	1.51894	0.133451	0.999858	-4.37945
RZPDp9027H1216Q	IZUMO4	RZPDp9027H1216Q	-0.218682	8.60133	-1.51875	0.133498	0.999858	-4.37958
RZPDp9028N1020Q	TSPYL1	RZPDp9028N1020Q	-0.356795	9.85428	-1.51773	0.133756	0.999858	-4.38026
RZPDp9028J067Q	FKBP8	RZPDp9028J067Q	-0.190064	8.10233	-1.51768	0.133768	0.999858	-4.38029
RZPDp9027B1410Q	PSMC4	RZPDp9027B1410Q	0.393096	9.48489	1.51764	0.133778	0.999858	-4.38032
RZPDp9028E177Q	ALDH3B1	RZPDp9028E177Q	-0.112314	7.21396	-1.51672	0.13401	0.999858	-4.38093
RZPDp9028D0921Q	FLII	RZPDp9028D0921Q	-0.243324	7.78706	-1.51617	0.13415	0.999858	-4.3813
RZPDp9027I066Q	UBE2D4	RZPDp9027I066Q	0.297012	8.57773	1.51598	0.134198	0.999858	-4.38143
RZPDp9028O042Q	LTBP3	RZPDp9028O042Q	-0.106696	7.16337	-1.51558	0.134297	0.999858	-4.38169
RZPDp9027A1519Q	RDH11	RZPDp9027A1519Q	0.329118	8.10207	1.5153	0.134369	0.999858	-4.38188
RZPDp9027N083Q	CRELD2	RZPDp9027N083Q	0.178661	8.64817	1.51522	0.134389	0.999858	-4.38193
RZPDp9028E178Q	NET1	RZPDp9028E178Q	0.13514	7.26562	1.51477	0.134503	0.999858	-4.38223
RZPDp9027B0714Q	NSMCE2	RZPDp9027B0714Q	0.20133	9.7008	1.51425	0.134635	0.999858	-4.38258
RZPDp9028L209Q	SNX2	RZPDp9028L209Q	-0.198645	7.55142	-1.51396	0.134709	0.999858	-4.38277
RZPDp9028E0112Q	RASSF7	RZPDp9028E0112Q	-0.0961362	6.90563	-1.51391	0.134721	0.999858	-4.38281
RZPDp9028J2112Q	ITM2B	RZPDp9028J2112Q	-0.0965892	6.9719	-1.51367	0.134781	0.999858	-4.38296
RZPDp9028C045Q	CAPNS1	RZPDp9028C045Q	-0.137418	7.86605	-1.5132	0.134901	0.999858	-4.38328
RZPDp9028H145Q	BANF1	RZPDp9028H145Q	-0.1198	7.24217	-1.51271	0.135024	0.999858	-4.3836
RZPDp9028G219Q	TWF2	RZPDp9028G219Q	-0.180646	7.70574	-1.51207	0.135187	0.999858	-4.38403
RZPDp9028O0613Q	DGKA	RZPDp9028O0613Q	-0.0995627	7.02129	-1.5119	0.135231	0.999858	-4.38414
RZPDp9028G1616Q	ING3	RZPDp9028G1616Q	-0.107897	6.87139	-1.51167	0.135288	0.999858	-4.38429
RZPDp9028B129Q	TBCB	RZPDp9028B129Q	0.309484	7.91245	1.51139	0.13536	0.999858	-4.38448
RZPDp9028H0416Q	NFRKB	RZPDp9028H0416Q	-0.120298	6.99552	-1.51138	0.135364	0.999858	-4.38449
RZPDp9027N174Q	ANK3	RZPDp9027N174Q	0.187852	9.33164	1.51129	0.135385	0.999858	-4.38455
RZPDp9028J1013Q	TNKS2	RZPDp9028J1013Q	-0.103118	7.15825	-1.51099	0.135462	0.999858	-4.38475
RZPDp9028N2212Q	PRDX6	RZPDp9028N2212Q	-0.0742083	6.85629	-1.51038	0.135617	0.999858	-4.38515
RZPDp9027O046Q	HSP90AB1	RZPDp9027O046Q	-0.270012	8.34478	-1.51022	0.135658	0.999858	-4.38526
RZPDp9027J0719Q	LUM	RZPDp9027J0719Q	0.283834	8.61281	1.51003	0.135707	0.999858	-4.38538
RZPDp9028O1617Q	PLCG1	RZPDp9028O1617Q	-0.281356	7.2301	-1.5096	0.135817	0.999858	-4.38567
RZPDp9027J1813Q	ENO1	RZPDp9027J1813Q	0.297088	9.32288	1.50925	0.135904	0.999858	-4.3859
RZPDp9028F1610Q	WDR18	RZPDp9028F1610Q	-0.0771894	7.17773	-1.50925	0.135906	0.999858	-4.3859
RZPDp9028E238Q	NPIPB12	RZPDp9028E238Q	0.127244	7.17641	1.50891	0.135992	0.999858	-4.38613
RZPDp9027E078Q	KHDRBS1	RZPDp9027E078Q	0.158999	8.02261	1.50873	0.136038	0.999858	-4.38624
RZPDp9028C1818Q	PUF60	RZPDp9028C1818Q	-0.134461	7.10403	-1.50847	0.136103	0.999858	-4.38641
RZPDp9028N067Q	DNMT1	RZPDp9028N067Q	-0.235523	7.65168	-1.50788	0.136255	0.999858	-4.38681
RZPDp9028O112Q	UBR7	RZPDp9028O112Q	-0.10682	7.52405	-1.50698	0.136486	0.999858	-4.38741
RZPDp9028O1010Q	NBPF26	RZPDp9028O1010Q	-0.176071	7.59546	-1.50613	0.136703	0.999858	-4.38797
RZPDp9027L029Q	CRMP1	RZPDp9027L029Q	0.213556	7.67718	1.50603	0.13673	0.999858	-4.38804
RZPDp9028H0414Q	GIMAP8	RZPDp9028H0414Q	-0.139492	7.07352	-1.50596	0.136746	0.999858	-4.38808
RZPDp9028P0417Q	HLA-B	RZPDp9028P0417Q	-0.084094	6.91964	-1.50573	0.136805	0.999858	-4.38823
RZPDp9028G0415Q	MPI	RZPDp9028G0415Q	-0.176727	7.23648	-1.50564	0.136827	0.999858	-4.38829
RZPDp9028D0614Q	CNOT1	RZPDp9028D0614Q	-0.143078	7.04034	-1.50555	0.136853	0.999858	-4.38835
RZPDp9028C0211Q	MED8	RZPDp9028C0211Q	-0.141324	7.1906	-1.50404	0.137239	0.999858	-4.38935
RZPDp9027J2410Q	MAPT	RZPDp9027J2410Q	0.222221	9.01599	1.50313	0.137473	0.999858	-4.38995
RZPDp9027I189Q	MKRN2	RZPDp9027I189Q	0.24046	8.26701	1.50309	0.137483	0.999858	-4.38998
RZPDp9028L2016Q	KDM5B	RZPDp9028L2016Q	-0.189187	7.52351	-1.50297	0.137514	0.999858	-4.39005
RZPDp9027J2412Q	SUGP2	RZPDp9027J2412Q	0.228297	9.63096	1.50293	0.137526	0.999858	-4.39009
RZPDp9028H0215Q	AP2M1	RZPDp9028H0215Q	-0.169308	7.30437	-1.5029	0.137533	0.999858	-4.3901
RZPDp9028G0814Q	UPK3BL1	RZPDp9028G0814Q	-0.171841	7.35195	-1.50274	0.137575	0.999858	-4.39021
RZPDp9028M243Q	DHCR24	RZPDp9028M243Q	0.120558	7.35124	1.50238	0.137666	0.999858	-4.39045
RZPDp9027L1615Q	KLHL22	RZPDp9027L1615Q	-0.291475	8.24808	-1.50112	0.137992	0.999858	-4.39128
RZPDp9027B141Q	PPP1R2	RZPDp9027B141Q	0.177271	8.13419	1.50106	0.138006	0.999858	-4.39132
RZPDp9028M234Q	EEF1A1	RZPDp9028M234Q	-0.217001	7.95717	-1.50106	0.138007	0.999858	-4.39132
RZPDp9028O0919Q	PDCD4	RZPDp9028O0919Q	-0.0876323	6.81853	-1.50094	0.138039	0.999858	-4.3914
RZPDp9027H0618Q	SRSF7	RZPDp9027H0618Q	-0.125246	7.30807	-1.50076	0.138083	0.999858	-4.39151
RZPDp9027J193Q	SNHG29	RZPDp9027J193Q	0.171196	8.73149	1.49953	0.138401	0.999858	-4.39232
RZPDp9027M2219Q	ENO2	RZPDp9027M2219Q	0.181887	7.99022	1.49947	0.138419	0.999858	-4.39237
RZPDp9028O108Q	POLE	RZPDp9028O108Q	-0.191875	7.63316	-1.49794	0.138815	0.999858	-4.39338
RZPDp9028J1715Q	CALHM2	RZPDp9028J1715Q	-0.24987	8.06675	-1.49765	0.138889	0.999858	-4.39357
RZPDp9028C0617Q	TCEA1	RZPDp9028C0617Q	-0.128433	6.95282	-1.49722	0.139002	0.999858	-4.39385
RZPDp9028G1717Q	ZNF44	RZPDp9028G1717Q	-0.297164	8.30625	-1.49676	0.139122	0.999858	-4.39415
RZPDp9028D0218Q	AHCTF1	RZPDp9028D0218Q	-0.162824	7.15316	-1.49667	0.139145	0.999858	-4.39421
RZPDp9028C0616Q	CHMP1A	RZPDp9028C0616Q	-0.155215	7.20693	-1.49622	0.139261	0.999858	-4.39451
RZPDp9028N1412Q	HTATIP2	RZPDp9028N1412Q	0.105743	7.03956	1.49615	0.13928	0.999858	-4.39455
RZPDp9028I2116Q	KMT2A	RZPDp9028I2116Q	-0.138069	6.81864	-1.49512	0.139549	0.999858	-4.39523
RZPDp9027J077Q	PABPC1	RZPDp9027J077Q	0.18333	8.26636	1.49504	0.139567	0.999858	-4.39528
RZPDp9028O1919Q	DHX38	RZPDp9028O1919Q	-0.143242	7.35983	-1.49501	0.139576	0.999858	-4.3953
RZPDp9028K103Q	INPPL1	RZPDp9028K103Q	-0.173252	7.58594	-1.49477	0.139639	0.999858	-4.39546
RZPDp9028P1319Q	RAN	RZPDp9028P1319Q	0.102755	6.88891	1.49468	0.139663	0.999858	-4.39552
RZPDp9027N198Q	RPS10	RZPDp9027N198Q	0.178585	8.84711	1.49466	0.139667	0.999858	-4.39553
RZPDp9028G1115Q	KLC2	RZPDp9028G1115Q	-0.176085	7.35847	-1.49427	0.13977	0.999858	-4.39579
RZPDp9027J055Q	ZNF579	RZPDp9027J055Q	0.159342	8.84481	1.49303	0.140091	0.999858	-4.3966
RZPDp9027K2218Q	HNRNPR	RZPDp9027K2218Q	-0.242263	8.76758	-1.49297	0.140108	0.999858	-4.39664
RZPDp9028P2216Q	ARHGAP45	RZPDp9028P2216Q	-0.153211	7.38004	-1.49279	0.140154	0.999858	-4.39676
RZPDp9028G0210Q	DOCK9	RZPDp9028G0210Q	-0.309737	8.14926	-1.49278	0.140157	0.999858	-4.39677
RZPDp9028B0620Q	RPS11	RZPDp9028B0620Q	-0.322974	9.70161	-1.49209	0.140338	0.999858	-4.39722
RZPDp9027N1319Q	POLDIP3	RZPDp9027N1319Q	0.225886	7.87493	1.49207	0.140343	0.999858	-4.39723
RZPDp9028A216Q	TANC2	RZPDp9028A216Q	0.181466	7.6659	1.49207	0.140344	0.999858	-4.39724
RZPDp9028K159Q	RPL4	RZPDp9028K159Q	-0.135704	7.39361	-1.49167	0.140448	0.999858	-4.3975
RZPDp9028H0812Q	NOMO1	RZPDp9028H0812Q	-0.0872693	6.70966	-1.49093	0.140641	0.999858	-4.39798
RZPDp9028D1813Q	STOML2	RZPDp9028D1813Q	-0.0916048	6.98524	-1.49017	0.14084	0.999858	-4.39848
RZPDp9028L1912Q	GRAMD1A	RZPDp9028L1912Q	-0.107905	6.8988	-1.48952	0.141011	0.999858	-4.39891
RZPDp9028D1913Q	YWHAE	RZPDp9028D1913Q	-0.104205	6.99845	-1.48914	0.141113	0.999858	-4.39916
RZPDp9027I015Q	POLR3E	RZPDp9027I015Q	0.329571	9.00432	1.48896	0.141158	0.999858	-4.39927
RZPDp9028F217Q	TNFAIP8	RZPDp9028F217Q	-0.229394	8.46473	-1.48883	0.141192	0.999858	-4.39936
RZPDp9028L1020Q	FAU	RZPDp9028L1020Q	-0.233291	8.02132	-1.48832	0.141327	0.999858	-4.39969
RZPDp9028L0315Q	EIF3M	RZPDp9028L0315Q	0.121466	7.07007	1.4882	0.14136	0.999858	-4.39977
RZPDp9027P0318Q	TUT4	RZPDp9027P0318Q	-0.356509	9.10039	-1.48802	0.141406	0.999858	-4.39989
RZPDp9028E2113Q	LINC01949	RZPDp9028E2113Q	-0.103407	7.04833	-1.48801	0.141409	0.999858	-4.3999
RZPDp9028O0415Q	GRK2	RZPDp9028O0415Q	-0.136641	7.06481	-1.48782	0.14146	0.999858	-4.40002
RZPDp9027E0210Q	HES6	RZPDp9027E0210Q	0.41959	8.91028	1.48753	0.141535	0.999858	-4.40021
RZPDp9028J1619Q	RPL15	RZPDp9028J1619Q	0.128598	6.95865	1.48724	0.141611	0.999858	-4.4004
RZPDp9028G1317Q	POLDIP2	RZPDp9028G1317Q	-0.147625	7.70243	-1.48674	0.141743	0.999858	-4.40073
RZPDp9027A186Q	RTN4	RZPDp9027A186Q	0.335644	10.0965	1.48629	0.141861	0.999858	-4.40102
RZPDp9027H155Q	ENO2	RZPDp9027H155Q	0.340666	8.18166	1.48602	0.141934	0.999858	-4.4012
RZPDp9027N033Q	PDXP	RZPDp9027N033Q	0.137227	8.5088	1.48585	0.141979	0.999858	-4.40131
RZPDp9028G2313Q	ATF3	RZPDp9028G2313Q	-0.0835168	6.97907	-1.48585	0.141979	0.999858	-4.40131
RZPDp9028E0113Q	DDX19B	RZPDp9028E0113Q	0.11517	7.13429	1.48549	0.142073	0.999858	-4.40154
RZPDp9027E1714Q	BCKDHA	RZPDp9027E1714Q	0.339618	8.52825	1.48541	0.142095	0.999858	-4.4016
RZPDp9028M1421Q	DEK	RZPDp9028M1421Q	0.0860418	6.7886	1.48514	0.142165	0.999858	-4.40177
RZPDp9027M0717Q	OCIAD2	RZPDp9027M0717Q	0.221646	8.63112	1.48488	0.142235	0.999858	-4.40194
RZPDp9028K1016Q	SMCHD1	RZPDp9028K1016Q	-0.12328	7.16167	-1.48408	0.142447	0.999858	-4.40247
RZPDp9028E129Q	STRADA	RZPDp9028E129Q	-0.168109	7.48103	-1.48398	0.142471	0.999858	-4.40253
RZPDp9028E121Q	VIM	RZPDp9028E121Q	0.104321	7.10968	1.48384	0.14251	0.999858	-4.40262
RZPDp9028H245Q	LGALS3	RZPDp9028H245Q	0.135227	7.58354	1.48324	0.142669	0.999858	-4.40302
RZPDp9028G1714Q	CLPTM1	RZPDp9028G1714Q	-0.220531	7.84603	-1.48232	0.142911	0.999858	-4.40361
RZPDp9028F162Q	FBN1	RZPDp9028F162Q	-0.124179	7.26975	-1.4814	0.143157	0.999858	-4.40422
RZPDp9028D0617Q	RPL5	RZPDp9028D0617Q	-0.107687	6.90521	-1.48123	0.143203	0.999858	-4.40433
RZPDp9027D239Q	RPL23A	RZPDp9027D239Q	-0.265427	9.62206	-1.48098	0.143267	0.999858	-4.40449
RZPDp9028A2115Q	EFHD2	RZPDp9028A2115Q	-0.120894	7.09281	-1.48052	0.143391	0.999858	-4.40479
RZPDp9028B1212Q	PSMA4	RZPDp9028B1212Q	0.133113	7.22865	1.48	0.14353	0.999858	-4.40513
RZPDp9028O1412Q	ARHGEF11	RZPDp9028O1412Q	0.197007	7.05608	1.4799	0.143556	0.999858	-4.40519
RZPDp9027C2019Q	KNSTRN	RZPDp9027C2019Q	-0.142346	7.76197	-1.47971	0.143606	0.999858	-4.40532
RZPDp9028L013Q	CLDN5	RZPDp9028L013Q	0.144284	7.23064	1.47967	0.143616	0.999858	-4.40534
RZPDp9028K0312Q	ZNF830	RZPDp9028K0312Q	-0.223128	7.52106	-1.47963	0.143628	0.999858	-4.40537
RZPDp9028P1617Q	LONP1	RZPDp9028P1617Q	-0.165669	7.13893	-1.4795	0.143663	0.999858	-4.40546
RZPDp9028L0614Q	NMI	RZPDp9028L0614Q	-0.0901908	7.13902	-1.47924	0.143733	0.999858	-4.40563
RZPDp9027C1818Q	DNMBP	RZPDp9027C1818Q	0.214613	8.69582	1.47895	0.14381	0.999858	-4.40581
RZPDp9027A0313Q	HMGN1	RZPDp9027A0313Q	0.244679	9.34004	1.47894	0.14381	0.999858	-4.40581
RZPDp9028K0919Q	RPS6	RZPDp9028K0919Q	-0.0943229	6.9179	-1.47888	0.143828	0.999858	-4.40586
RZPDp9027B052Q	EXOSC8	RZPDp9027B052Q	0.174511	8.04736	1.47862	0.143896	0.999858	-4.40602
RZPDp9028C1116Q	SNU13	RZPDp9028C1116Q	-0.120614	7.29068	-1.47849	0.143931	0.999858	-4.40611
RZPDp9027K167Q	PLEKHA5	RZPDp9027K167Q	-0.297317	8.68956	-1.47841	0.143952	0.999858	-4.40616
RZPDp9027E175Q	FBN3	RZPDp9027E175Q	0.257458	8.58516	1.47826	0.143992	0.999858	-4.40626
RZPDp9028E2214Q	PSME1	RZPDp9028E2214Q	-0.268532	8.95089	-1.47782	0.14411	0.999858	-4.40655
RZPDp9028L0412Q	POLR1D	RZPDp9028L0412Q	-0.11287	6.94138	-1.47728	0.144254	0.999858	-4.4069
RZPDp9028F2119Q	RPS27	RZPDp9028F2119Q	-0.120321	6.86996	-1.4766	0.144437	0.999858	-4.40734
RZPDp9028P057Q	SYVN1	RZPDp9028P057Q	-0.171575	7.61063	-1.47625	0.144529	0.999858	-4.40757
RZPDp9027E1617Q	GLUL	RZPDp9027E1617Q	0.116639	7.82073	1.47608	0.144575	0.999858	-4.40768
RZPDp9027N1215Q	PHGDH	RZPDp9027N1215Q	-0.208083	7.9112	-1.47578	0.144657	0.999858	-4.40788
RZPDp9028P0516Q	ZNF554	RZPDp9028P0516Q	0.152443	7.23292	1.47561	0.144701	0.999858	-4.40798
RZPDp9028J0918Q	WASHC1	RZPDp9028J0918Q	-0.20043	7.35983	-1.47555	0.144717	0.999858	-4.40802
RZPDp9028P1913Q	NUS1	RZPDp9028P1913Q	-0.11116	7.05715	-1.47511	0.144837	0.999858	-4.40831
RZPDp9028D021Q	TRIM28	RZPDp9028D021Q	0.130517	7.19537	1.47476	0.144929	0.999858	-4.40854
RZPDp9028C1518Q	ZBTB8OS	RZPDp9028C1518Q	-0.105975	6.64511	-1.47456	0.144984	0.999858	-4.40867
RZPDp9028L1713Q	CCDC115	RZPDp9028L1713Q	-0.0903438	6.95482	-1.47428	0.145059	0.999858	-4.40885
RZPDp9028E0714Q	TAF1	RZPDp9028E0714Q	-0.147171	7.31984	-1.47407	0.145115	0.999858	-4.40898
RZPDp9028L1417Q	PIK3R1	RZPDp9028L1417Q	-0.112706	6.98657	-1.474	0.145134	0.999858	-4.40903
RZPDp9028C062Q	CCDC88C	RZPDp9028C062Q	-0.110808	7.72475	-1.47373	0.145206	0.999858	-4.40921
RZPDp9028A1116Q	C15orf39	RZPDp9028A1116Q	-0.101118	6.90861	-1.47293	0.14542	0.999858	-4.40972
RZPDp9027H0319Q	ROBO3	RZPDp9027H0319Q	0.145632	7.51058	1.4729	0.145429	0.999858	-4.40974
RZPDp9028J1319Q	NFKBIA	RZPDp9028J1319Q	0.111464	6.56735	1.47236	0.145575	0.999858	-4.41009
RZPDp9027H018Q	NIPSNAP1	RZPDp9027H018Q	-0.0600001	6.30118	-1.47223	0.14561	0.999858	-4.41018
RZPDp9028O0312Q	HLA-E	RZPDp9028O0312Q	-0.113228	7.51294	-1.47213	0.145638	0.999858	-4.41025
RZPDp9028I0813Q	DNLZ	RZPDp9028I0813Q	-0.0809621	7.00578	-1.47197	0.14568	0.999858	-4.41035
RZPDp9027D088Q	SF3B4	RZPDp9027D088Q	-0.163109	8.02345	-1.47181	0.145723	0.999858	-4.41045
RZPDp9028D219Q	RANBP2	RZPDp9028D219Q	-0.198846	7.8028	-1.4718	0.145725	0.999858	-4.41046
RZPDp9027D1415Q	C1S	RZPDp9027D1415Q	0.111032	7.40697	1.47126	0.145872	0.999858	-4.41081
RZPDp9027A166Q	GIT1	RZPDp9027A166Q	0.217848	9.08259	1.47104	0.14593	0.999858	-4.41095
RZPDp9028K0517Q	TADA2B	RZPDp9028K0517Q	-0.0718229	6.91645	-1.47062	0.146043	0.999858	-4.41122
RZPDp9028M2017Q	RPS26	RZPDp9028M2017Q	-0.085014	6.90139	-1.47055	0.146061	0.999858	-4.41126
RZPDp9028F0120Q	ZFYVE28	RZPDp9028F0120Q	-0.078927	6.80293	-1.47053	0.146067	0.999858	-4.41128
RZPDp9027D2210Q	PGRMC2	RZPDp9027D2210Q	-0.254582	9.13831	-1.47034	0.146118	0.999858	-4.4114
RZPDp9028D0511Q	NDUFB10	RZPDp9028D0511Q	-0.09532	7.14059	-1.47022	0.146152	0.999858	-4.41148
RZPDp9028P046Q	SLC9A3	RZPDp9028P046Q	-0.190286	7.56729	-1.47013	0.146175	0.999858	-4.41154
RZPDp9028N1817Q	COX6B1	RZPDp9028N1817Q	-0.140123	7.31434	-1.4689	0.146508	0.999858	-4.41233
RZPDp9028B021Q	RPH3AL	RZPDp9028B021Q	-0.098087	7.05004	-1.46842	0.14664	0.999858	-4.41265
RZPDp9028C204Q	KANK2	RZPDp9028C204Q	-0.20832	8.0156	-1.46822	0.146693	0.999858	-4.41278
RZPDp9028G1713Q	HSPA4	RZPDp9028G1713Q	-0.119026	7.08583	-1.46793	0.146772	0.999858	-4.41296
RZPDp9027N024Q	RPL22	RZPDp9027N024Q	0.180937	8.78576	1.46752	0.146883	0.999858	-4.41323
RZPDp9027J172Q	SELENOH	RZPDp9027J172Q	0.189149	8.80982	1.4665	0.14716	0.999858	-4.41389
RZPDp9027C0217Q	PLEKHB2	RZPDp9027C0217Q	0.238508	8.24593	1.46624	0.147229	0.999858	-4.41405
RZPDp9027O244Q	BFAR	RZPDp9027O244Q	0.200276	10.1962	1.46598	0.147299	0.999858	-4.41422
RZPDp9027J166Q	DHX36	RZPDp9027J166Q	0.247869	9.59692	1.46571	0.147375	0.999858	-4.4144
RZPDp9028G1521Q	TRABD2A	RZPDp9028G1521Q	-0.0911015	6.80859	-1.46563	0.147394	0.999858	-4.41445
RZPDp9028L016Q	SPON2	RZPDp9028L016Q	0.162679	7.17321	1.46542	0.147453	0.999858	-4.41458
RZPDp9028L1018Q	CCDC88C	RZPDp9028L1018Q	-0.126575	6.89613	-1.46528	0.147491	0.999858	-4.41468
RZPDp9028F0619Q	SPTAN1	RZPDp9028F0619Q	-0.125764	7.35758	-1.46461	0.147672	0.999858	-4.4151
RZPDp9027N0213Q	ZMIZ2	RZPDp9027N0213Q	0.251525	8.41446	1.46448	0.147707	0.999858	-4.41519
RZPDp9028P0216Q	CCNL1	RZPDp9028P0216Q	-0.0860679	6.8786	-1.46379	0.147897	0.999858	-4.41564
RZPDp9028O1118Q	SRI	RZPDp9028O1118Q	-0.158666	7.41608	-1.46371	0.147918	0.999858	-4.41569
RZPDp9028O0114Q	TWNK	RZPDp9028O0114Q	-0.214542	7.59421	-1.46346	0.147985	0.999858	-4.41585
RZPDp9028P0812Q	EIF5A	RZPDp9028P0812Q	-0.0946127	7.0597	-1.46341	0.148001	0.999858	-4.41588
RZPDp9027M156Q	NME1	RZPDp9027M156Q	0.239541	7.96078	1.46245	0.148262	0.999858	-4.4165
RZPDp9028P033Q	FLNA	RZPDp9028P033Q	0.115752	7.1075	1.46144	0.148537	0.999858	-4.41715
RZPDp9027M1718Q	PRKCI	RZPDp9027M1718Q	0.247738	8.76668	1.46129	0.148578	0.999858	-4.41725
RZPDp9027J2319Q	CAMKV	RZPDp9027J2319Q	0.268359	8.5533	1.46123	0.148596	0.999858	-4.41729
RZPDp9027A155Q	ELMO1	RZPDp9027A155Q	0.231178	7.79846	1.46078	0.148718	0.999858	-4.41757
RZPDp9028O113Q	GTF3C1	RZPDp9028O113Q	-0.0967917	7.24709	-1.46036	0.148835	0.999858	-4.41785
RZPDp9028E1521Q	TRMT1	RZPDp9028E1521Q	0.0910034	6.7601	1.46033	0.148842	0.999858	-4.41787
RZPDp9027B129Q	ARHGAP33	RZPDp9027B129Q	0.178607	8.68789	1.45995	0.148947	0.999858	-4.41811
RZPDp9028O175Q	NFATC4	RZPDp9028O175Q	-0.174767	8.6033	-1.45954	0.149059	0.999858	-4.41838
RZPDp9028E2416Q	TACC3	RZPDp9028E2416Q	0.171181	6.92427	1.45953	0.149061	0.999858	-4.41838
RZPDp9027E1314Q	KDM3B	RZPDp9027E1314Q	-0.268321	8.54989	-1.45925	0.149137	0.999858	-4.41856
RZPDp9027M023Q	DHCR24	RZPDp9027M023Q	0.131971	8.24702	1.45875	0.149276	0.999858	-4.41888
RZPDp9028J117Q	ECE1	RZPDp9028J117Q	-0.103091	6.9885	-1.45869	0.149292	0.999858	-4.41892
RZPDp9028C0715Q	DOCK10	RZPDp9028C0715Q	-0.136058	6.97312	-1.45864	0.149306	0.999858	-4.41895
RZPDp9027E151Q	RPS27A	RZPDp9027E151Q	0.163167	8.26364	1.45844	0.149361	0.999858	-4.41908
RZPDp9027F156Q	EIF4B	RZPDp9027F156Q	0.168125	8.50207	1.4581	0.149452	0.999858	-4.4193
RZPDp9028E201Q	CEP164	RZPDp9028E201Q	-0.11605	7.04008	-1.45801	0.14948	0.999858	-4.41936
RZPDp9028H153Q	FBN1	RZPDp9028H153Q	-0.0990423	7.13476	-1.45733	0.149664	0.999858	-4.41979
RZPDp9028B154Q	VCPIP1	RZPDp9028B154Q	-0.149845	7.76379	-1.45719	0.149703	0.999858	-4.41988
RZPDp9028K024Q	MECP2	RZPDp9028K024Q	-0.054961	6.30795	-1.45711	0.149726	0.999858	-4.41994
RZPDp9028A135Q	ADAMTS7	RZPDp9028A135Q	0.208673	7.43609	1.45709	0.149732	0.999858	-4.41995
RZPDp9027A1511Q	EIF4A2	RZPDp9027A1511Q	0.274853	8.71261	1.4565	0.149894	0.999858	-4.42033
RZPDp9028G169Q	HPRT1	RZPDp9028G169Q	-0.13156	7.32751	-1.45611	0.150001	0.999858	-4.42058
RZPDp9028M147Q	SELENOS	RZPDp9028M147Q	0.126639	7.27128	1.45606	0.150016	0.999858	-4.42061
RZPDp9028G0518Q	PRRC2B	RZPDp9028G0518Q	-0.113171	6.87761	-1.45472	0.150385	0.999858	-4.42147
RZPDp9027F1217Q	PITPNA	RZPDp9027F1217Q	0.183368	9.45114	1.45426	0.150512	0.999858	-4.42177
RZPDp9028F0617Q	GLE1	RZPDp9028F0617Q	0.102516	7.09188	1.45415	0.150543	0.999858	-4.42184
RZPDp9028M0414Q	ACAP1	RZPDp9028M0414Q	-0.0888154	6.8631	-1.45399	0.150588	0.999858	-4.42194
RZPDp9028L0416Q	ROCK1	RZPDp9028L0416Q	-0.0802514	6.86412	-1.45366	0.150677	0.999858	-4.42215
RZPDp9028H1917Q	SYTL1	RZPDp9028H1917Q	-0.0749607	6.75403	-1.4536	0.150694	0.999858	-4.42219
RZPDp9027G1919Q	NUDT5	RZPDp9027G1919Q	0.300267	8.1388	1.45262	0.150966	0.999858	-4.42282
RZPDp9028H241Q	S100A10	RZPDp9028H241Q	-0.17883	9.06493	-1.45253	0.150989	0.999858	-4.42287
RZPDp9028A021Q	ADAMTS4	RZPDp9028A021Q	0.152862	7.65814	1.45247	0.151007	0.999858	-4.42291
RZPDp9028O1517Q	PKM	RZPDp9028O1517Q	-0.139219	7.31014	-1.4523	0.151055	0.999858	-4.42302
RZPDp9027B056Q	WRAP53	RZPDp9027B056Q	0.52931	8.20914	1.45174	0.151209	0.999858	-4.42338
RZPDp9028E0216Q	PHF1	RZPDp9028E0216Q	0.149639	6.9636	1.45121	0.151357	0.999858	-4.42372
RZPDp9028A0915Q	SMYD5	RZPDp9028A0915Q	-0.118957	6.92589	-1.45109	0.15139	0.999858	-4.4238
RZPDp9028P2212Q	HMGN1	RZPDp9028P2212Q	-0.12431	7.06675	-1.45103	0.151405	0.999858	-4.42383
RZPDp9028M1719Q	PSMB7	RZPDp9028M1719Q	-0.0864797	6.84073	-1.45095	0.15143	0.999858	-4.42389
RZPDp9027B194Q	MYL6	RZPDp9027B194Q	0.189852	8.85466	1.45087	0.15145	0.999858	-4.42394
RZPDp9028L1316Q	S100A4	RZPDp9028L1316Q	-0.0788888	6.91852	-1.45066	0.151509	0.999858	-4.42407
RZPDp9027I0712Q	MPP3	RZPDp9027I0712Q	0.24227	9.59294	1.45026	0.15162	0.999858	-4.42433
RZPDp9028F1918Q	PXN	RZPDp9028F1918Q	0.12932	6.88437	1.44895	0.151984	0.999858	-4.42516
RZPDp9027F0116Q	PRAG1	RZPDp9027F0116Q	0.32833	9.41448	1.44876	0.152037	0.999858	-4.42529
RZPDp9028F2117Q	EXOSC10	RZPDp9028F2117Q	-0.110165	6.94312	-1.4487	0.152053	0.999858	-4.42532
RZPDp9027M058Q	SH2B1	RZPDp9027M058Q	0.369367	9.4872	1.44848	0.152114	0.999858	-4.42546
RZPDp9028G1414Q	DRG2	RZPDp9028G1414Q	-0.175022	7.35746	-1.44834	0.152155	0.999858	-4.42556
RZPDp9028C193Q	HIRIP3	RZPDp9028C193Q	-0.282817	9.42977	-1.4482	0.152195	0.999858	-4.42565
RZPDp9027E128Q	EIF4A1	RZPDp9027E128Q	0.180122	8.51334	1.44809	0.152225	0.999858	-4.42572
RZPDp9027N0719Q	IGBP1	RZPDp9027N0719Q	0.282768	8.59562	1.44778	0.152311	0.999858	-4.42591
RZPDp9028G229Q	LRRC8A	RZPDp9028G229Q	-0.158266	7.66792	-1.44729	0.152447	0.999858	-4.42623
RZPDp9027A195Q	TUBB6	RZPDp9027A195Q	0.169508	7.81294	1.44726	0.152456	0.999858	-4.42625
RZPDp9028G1920Q	USP9Y	RZPDp9028G1920Q	-0.299025	8.09232	-1.44698	0.152534	0.999858	-4.42642
RZPDp9028A092Q	ZC3H18	RZPDp9028A092Q	0.0734895	7.00523	1.44641	0.152693	0.999858	-4.42679
RZPDp9028E0919Q	VCPIP1	RZPDp9028E0919Q	-0.0969857	6.76595	-1.44624	0.152742	0.999858	-4.4269
RZPDp9028N0120Q	EVL	RZPDp9028N0120Q	-0.128592	6.98409	-1.44602	0.152803	0.999858	-4.42704
RZPDp9028G165Q	MAFK	RZPDp9028G165Q	-0.147493	7.53553	-1.44475	0.153157	0.999858	-4.42785
RZPDp9028P0716Q	RPS26	RZPDp9028P0716Q	-0.282527	8.28031	-1.44416	0.153323	0.999858	-4.42822
RZPDp9027C1017Q	MTCH1	RZPDp9027C1017Q	-0.154031	8.70537	-1.44315	0.153607	0.999858	-4.42887
RZPDp9028I1916Q	DOCK2	RZPDp9028I1916Q	-0.285889	7.46794	-1.44292	0.153671	0.999858	-4.42901
RZPDp9028F244Q	PCGF2	RZPDp9028F244Q	0.172467	8.17275	1.44279	0.153707	0.999858	-4.42909
RZPDp9028H138Q	PSMD9	RZPDp9028H138Q	-0.14314	7.39183	-1.44208	0.153907	0.999858	-4.42955
RZPDp9028O1020Q	UQCRC1	RZPDp9028O1020Q	-0.199485	7.99915	-1.44197	0.153937	0.999858	-4.42962
RZPDp9028O1621Q	DISC1	RZPDp9028O1621Q	-0.239603	8.0021	-1.44196	0.153941	0.999858	-4.42962
RZPDp9028J202Q	ITGB4	RZPDp9028J202Q	-0.166412	7.31405	-1.44173	0.154006	0.999858	-4.42977
RZPDp9028F0920Q	GANAB	RZPDp9028F0920Q	-0.102943	7.33455	-1.44171	0.154011	0.999858	-4.42978
RZPDp9028H0810Q	UBC	RZPDp9028H0810Q	-0.121465	7.26938	-1.44079	0.154271	0.999858	-4.43037
RZPDp9028G1418Q	ABI1	RZPDp9028G1418Q	-0.14072	7.06767	-1.44064	0.154313	0.999858	-4.43047
RZPDp9028J2010Q	MRTO4	RZPDp9028J2010Q	-0.226879	7.84221	-1.44061	0.154321	0.999858	-4.43048
RZPDp9027E195Q	ATG13	RZPDp9027E195Q	0.225031	8.45887	1.44007	0.154473	0.999858	-4.43083
RZPDp9028A1314Q	PNO1	RZPDp9028A1314Q	-0.123318	7.03996	-1.43992	0.154515	0.999858	-4.43092
RZPDp9028C061Q	OLFML2A	RZPDp9028C061Q	-0.0747329	7.03495	-1.43969	0.154581	0.999858	-4.43107
RZPDp9027A0219Q	KLHDC3	RZPDp9027A0219Q	0.118572	7.43731	1.43894	0.154793	0.999858	-4.43155
RZPDp9027M2010Q	BEX1	RZPDp9027M2010Q	0.273464	8.22151	1.43878	0.154836	0.999858	-4.43164
RZPDp9028L0310Q	MECP2	RZPDp9028L0310Q	0.146413	7.23268	1.43872	0.154854	0.999858	-4.43168
RZPDp9027K016Q	CRTC1	RZPDp9027K016Q	0.251324	8.3638	1.43844	0.154934	0.999858	-4.43186
RZPDp9028C0212Q	SP2	RZPDp9028C0212Q	-0.0900006	6.86759	-1.43826	0.154985	0.999858	-4.43198
RZPDp9027C041Q	TTYH1	RZPDp9027C041Q	-0.274364	7.89826	-1.43682	0.155392	0.999858	-4.43289
RZPDp9028I022Q	MMP2	RZPDp9028I022Q	0.151963	7.28367	1.43678	0.155404	0.999858	-4.43292
RZPDp9027M192Q	PHGDH	RZPDp9027M192Q	0.229248	9.77489	1.43615	0.155582	0.999858	-4.43332
RZPDp9027A024Q	RPL3	RZPDp9027A024Q	0.170114	9.3791	1.43609	0.155598	0.999858	-4.43335
RZPDp9027M033Q	SH3BGRL3	RZPDp9027M033Q	0.148211	8.37655	1.43584	0.155669	0.999858	-4.43351
RZPDp9027N1816Q	PRDM10	RZPDp9027N1816Q	0.217065	9.10896	1.43501	0.155906	0.999858	-4.43404
RZPDp9027M0219Q	RELA	RZPDp9027M0219Q	0.148027	7.66919	1.43426	0.156118	0.999858	-4.43451
RZPDp9027B1818Q	TRIM37	RZPDp9027B1818Q	0.288838	8.86868	1.43421	0.156133	0.999858	-4.43455
RZPDp9028L1116Q	PMPCA	RZPDp9028L1116Q	-0.163027	7.35922	-1.43403	0.156183	0.999858	-4.43466
RZPDp9027F171Q	MVD	RZPDp9027F171Q	0.22817	7.03419	1.43382	0.156243	0.999858	-4.43479
RZPDp9028D101Q	FHL2	RZPDp9028D101Q	-0.104922	7.29693	-1.43373	0.156268	0.999858	-4.43485
RZPDp9028E082Q	ELF3	RZPDp9028E082Q	0.277945	8.92335	1.43361	0.156303	0.999858	-4.43492
RZPDp9027N158Q	PEX14	RZPDp9027N158Q	0.228364	9.36047	1.43351	0.156331	0.999858	-4.43499
RZPDp9027B249Q	TRIR	RZPDp9027B249Q	0.166612	8.73522	1.43306	0.156461	0.999858	-4.43527
RZPDp9028E111Q	NIBAN2	RZPDp9028E111Q	-0.127738	6.92509	-1.43282	0.156527	0.999858	-4.43542
RZPDp9028N2319Q	MORC2	RZPDp9028N2319Q	-0.0771591	6.77913	-1.43215	0.15672	0.999858	-4.43585
RZPDp9028C151Q	TJP1	RZPDp9028C151Q	-0.115964	7.23952	-1.43212	0.156727	0.999858	-4.43587
RZPDp9028B1214Q	SREBF2	RZPDp9028B1214Q	0.141055	7.11505	1.43206	0.156746	0.999858	-4.43591
RZPDp9028B0113Q	SLBP	RZPDp9028B0113Q	0.0954304	6.98172	1.43196	0.156774	0.999858	-4.43597
RZPDp9028E0819Q	TNRC18	RZPDp9028E0819Q	-0.0962505	6.8373	-1.43169	0.15685	0.999858	-4.43614
RZPDp9028F147Q	HNRNPM	RZPDp9028F147Q	-0.211389	7.45592	-1.43152	0.156898	0.999858	-4.43624
RZPDp9028L0415Q	PFDN5	RZPDp9028L0415Q	-0.205593	7.82367	-1.43132	0.156955	0.999858	-4.43637
RZPDp9028B2117Q	RPL37	RZPDp9028B2117Q	-0.113149	7.01811	-1.43108	0.157023	0.999858	-4.43652
RZPDp9028A1219Q	NLRP1	RZPDp9028A1219Q	0.10858	6.8884	1.43083	0.157095	0.999858	-4.43668
RZPDp9027A231Q	HDAC3	RZPDp9027A231Q	0.307177	9.36046	1.43072	0.157128	0.999858	-4.43675
RZPDp9027I129Q	NBPF26	RZPDp9027I129Q	0.231261	8.97659	1.43008	0.15731	0.999858	-4.43716
RZPDp9028M124Q	NACC1	RZPDp9028M124Q	0.235625	7.66385	1.42977	0.157399	0.999858	-4.43735
RZPDp9028P1520Q	DNAJB1	RZPDp9028P1520Q	-0.0868627	6.79886	-1.42938	0.157509	0.999858	-4.4376
RZPDp9028G0921Q	ANKHD1	RZPDp9028G0921Q	-0.134346	6.74792	-1.42928	0.157538	0.999858	-4.43766
RZPDp9027O2112Q	EEF1G	RZPDp9027O2112Q	-0.168885	9.23635	-1.42919	0.157564	0.999858	-4.43772
RZPDp9028D0311Q	ZNF335	RZPDp9028D0311Q	-0.14325	7.00285	-1.42857	0.157742	0.999858	-4.43811
RZPDp9028M032Q	CEP164	RZPDp9028M032Q	0.101564	7.16184	1.42829	0.157823	0.999858	-4.43829
RZPDp9027D087Q	FMNL2	RZPDp9027D087Q	-0.141722	8.12009	-1.42752	0.158044	0.999858	-4.43877
RZPDp9028J1012Q	EIF4E2	RZPDp9028J1012Q	-0.0933764	7.26734	-1.42741	0.158075	0.999858	-4.43884
RZPDp9028K1112Q	PRKCQ	RZPDp9028K1112Q	-0.144817	7.37483	-1.42652	0.158331	0.999858	-4.4394
RZPDp9028H1516Q	ANKHD1	RZPDp9028H1516Q	-0.0919784	6.94977	-1.42636	0.158378	0.999858	-4.43951
RZPDp9028E0719Q	PLCB2	RZPDp9028E0719Q	-0.0865724	6.84228	-1.4261	0.158452	0.999858	-4.43967
RZPDp9028D057Q	STAT1	RZPDp9028D057Q	-0.168249	7.43464	-1.42594	0.158497	0.999858	-4.43977
RZPDp9028E112Q	CRABP2	RZPDp9028E112Q	-0.101956	7.16519	-1.42548	0.158629	0.999858	-4.44006
RZPDp9027E199Q	FIS1	RZPDp9027E199Q	0.231809	8.11531	1.42501	0.158765	0.999858	-4.44035
RZPDp9028M155Q	HDLBP	RZPDp9028M155Q	0.139291	7.7882	1.42478	0.158832	0.999858	-4.4405
RZPDp9028G1111Q	ATAD3B	RZPDp9028G1111Q	-0.137717	7.26685	-1.42473	0.158847	0.999858	-4.44053
RZPDp9027E184Q	HPCAL1	RZPDp9027E184Q	0.187098	9.09028	1.42466	0.158867	0.999858	-4.44058
RZPDp9027F1610Q	C19orf25	RZPDp9027F1610Q	0.203974	9.12458	1.42439	0.158944	0.999858	-4.44074
RZPDp9028G2217Q	PSMA7	RZPDp9028G2217Q	-0.101513	7.16985	-1.42438	0.158946	0.999858	-4.44075
RZPDp9028C1519Q	IL17RA	RZPDp9028C1519Q	-0.0793256	6.84007	-1.42422	0.158992	0.999858	-4.44085
RZPDp9027E069Q	ILF3	RZPDp9027E069Q	0.218315	9.0176	1.42398	0.159062	0.999858	-4.441
RZPDp9028N0610Q	PLXNA1	RZPDp9028N0610Q	0.212911	7.84945	1.42343	0.159221	0.999858	-4.44135
RZPDp9028F066Q	RPS5	RZPDp9028F066Q	0.219216	7.93907	1.42333	0.159249	0.999858	-4.44141
RZPDp9028O109Q	TALDO1	RZPDp9028O109Q	-0.125355	7.56989	-1.4229	0.159374	0.999858	-4.44168
RZPDp9028A101Q	CLIP2	RZPDp9028A101Q	-0.120285	7.18761	-1.4214	0.159807	0.999858	-4.44262
RZPDp9028C202Q	KANSL1	RZPDp9028C202Q	-0.0841454	7.092	-1.42128	0.159842	0.999858	-4.4427
RZPDp9027C229Q	ZNF250	RZPDp9027C229Q	-0.160807	8.07417	-1.4212	0.159867	0.999858	-4.44275
RZPDp9028J1520Q	EIF4A1	RZPDp9028J1520Q	-0.187917	7.65303	-1.42026	0.160138	0.999858	-4.44334
RZPDp9027J024Q	GNB2	RZPDp9027J024Q	0.222048	8.71175	1.41931	0.160414	0.999858	-4.44394
RZPDp9028D196Q	VDAC1	RZPDp9028D196Q	0.2065	7.4781	1.41906	0.160485	0.999858	-4.44409
RZPDp9027F058Q	CUEDC2	RZPDp9027F058Q	0.466176	9.63227	1.41877	0.16057	0.999858	-4.44427
RZPDp9028K0719Q	ZNF395	RZPDp9028K0719Q	0.120113	6.88161	1.41834	0.160694	0.999858	-4.44454
RZPDp9028F1513Q	N4BP1	RZPDp9028F1513Q	-0.0907161	6.99451	-1.41809	0.160768	0.999858	-4.4447
RZPDp9028K055Q	CTSH	RZPDp9028K055Q	-0.12369	7.50334	-1.41776	0.160863	0.999858	-4.44491
RZPDp9028K0320Q	PDZD4	RZPDp9028K0320Q	-0.21824	8.00037	-1.41765	0.160897	0.999858	-4.44498
RZPDp9028J1420Q	HSP90AA1	RZPDp9028J1420Q	0.134889	6.7834	1.41738	0.160975	0.999858	-4.44515
RZPDp9028B111Q	MINK1	RZPDp9028B111Q	-0.140848	7.33894	-1.41692	0.161107	0.999858	-4.44543
RZPDp9028M0619Q	H2AC20	RZPDp9028M0619Q	-0.0939402	6.90212	-1.4167	0.161172	0.999858	-4.44557
RZPDp9028A2215Q	TXNRD1	RZPDp9028A2215Q	-0.139961	7.10575	-1.41663	0.161192	0.999858	-4.44561
RZPDp9027N105Q	BCL11B	RZPDp9027N105Q	0.153433	9.29708	1.41625	0.161303	0.999858	-4.44585
RZPDp9027F108Q	CTSL	RZPDp9027F108Q	0.13244	9.36402	1.41578	0.16144	0.999858	-4.44615
RZPDp9028K022Q	KIAA1671	RZPDp9028K022Q	-0.107784	7.08622	-1.4156	0.161494	0.999858	-4.44626
RZPDp9027E062Q	NMT1	RZPDp9027E062Q	0.19939	9.31185	1.4155	0.161522	0.999858	-4.44632
RZPDp9027G2411Q	VPS41	RZPDp9027G2411Q	0.179012	8.37753	1.41539	0.161556	0.999858	-4.44639
RZPDp9028I089Q	NOLC1	RZPDp9028I089Q	-0.0750766	6.86785	-1.41528	0.161586	0.999858	-4.44646
RZPDp9028H083Q	PRSS8	RZPDp9028H083Q	-0.153222	7.41553	-1.41504	0.161657	0.999858	-4.44661
RZPDp9027A0819Q	RPL7A	RZPDp9027A0819Q	0.22523	8.38728	1.41475	0.161741	0.999858	-4.44679
RZPDp9027F048Q	CSTB	RZPDp9027F048Q	0.191132	9.32068	1.4147	0.161757	0.999858	-4.44682
RZPDp9028I1214Q	MECP2	RZPDp9028I1214Q	-0.168904	7.11177	-1.41457	0.161793	0.999858	-4.4469
RZPDp9028H1011Q	EZR	RZPDp9028H1011Q	-0.100944	7.02566	-1.41412	0.161925	0.999858	-4.44718
RZPDp9028G096Q	TCF4	RZPDp9028G096Q	-0.167141	7.60946	-1.41383	0.162012	0.999858	-4.44737
RZPDp9028C0611Q	LUC7L3	RZPDp9028C0611Q	-0.303282	8.7877	-1.41352	0.1621	0.999858	-4.44756
RZPDp9028H1211Q	KARS1	RZPDp9028H1211Q	0.108706	6.94982	1.41242	0.162423	0.999858	-4.44825
RZPDp9027K036Q	AMN1	RZPDp9027K036Q	-0.224396	9.32668	-1.41118	0.162786	0.999858	-4.44902
RZPDp9028H051Q	ZFP36	RZPDp9028H051Q	-0.154615	7.75024	-1.41067	0.162938	0.999858	-4.44934
RZPDp9028G0919Q	ST13	RZPDp9028G0919Q	-0.0753727	6.83083	-1.40999	0.163137	0.999858	-4.44976
RZPDp9027M2410Q	CD47	RZPDp9027M2410Q	0.207238	8.48937	1.40924	0.163359	0.999858	-4.45023
RZPDp9028K1810Q	ETFB	RZPDp9028K1810Q	-0.215439	8.10104	-1.40919	0.163371	0.999858	-4.45026
RZPDp9028D029Q	PUM3	RZPDp9028D029Q	0.105985	7.18654	1.40915	0.163385	0.999858	-4.45029
RZPDp9028K2212Q	EP300	RZPDp9028K2212Q	-0.183224	7.29086	-1.40894	0.163447	0.999858	-4.45042
RZPDp9028G117Q	PLVAP	RZPDp9028G117Q	-0.145551	7.51732	-1.40854	0.163563	0.999858	-4.45066
RZPDp9028G0413Q	KRI1	RZPDp9028G0413Q	-0.1185	7.11181	-1.4083	0.163636	0.999858	-4.45082
RZPDp9028G1311Q	HSP90AB1	RZPDp9028G1311Q	-0.0732871	6.89684	-1.40805	0.16371	0.999858	-4.45098
RZPDp9027E246Q	SAC3D1	RZPDp9027E246Q	0.159354	9.34695	1.40768	0.163817	0.999858	-4.4512
RZPDp9028G1715Q	SNRNP200	RZPDp9028G1715Q	-0.153064	7.13792	-1.40694	0.164036	0.999858	-4.45166
RZPDp9028K057Q	RABL6	RZPDp9028K057Q	-0.180248	7.69778	-1.4065	0.164166	0.999858	-4.45194
RZPDp9027D0817Q	CIC	RZPDp9027D0817Q	-0.183431	8.47264	-1.40573	0.164394	0.999858	-4.45242
RZPDp9027E1410Q	MGAT5B	RZPDp9027E1410Q	0.20439	7.60339	1.40533	0.164512	0.999858	-4.45266
RZPDp9028O146Q	EMILIN2	RZPDp9028O146Q	-0.154723	7.90007	-1.40488	0.164647	0.999858	-4.45295
RZPDp9027L223Q	CACNB1	RZPDp9027L223Q	-0.136988	8.22418	-1.40483	0.164659	0.999858	-4.45297
RZPDp9028M173Q	MRI1	RZPDp9028M173Q	-0.070779	7.05646	-1.40469	0.164702	0.999858	-4.45306
RZPDp9028N0219Q	ENTR1	RZPDp9028N0219Q	0.0741338	6.78069	1.40439	0.164792	0.999858	-4.45325
RZPDp9027N153Q	RPS27	RZPDp9027N153Q	0.140945	8.07707	1.40255	0.165336	0.999858	-4.45439
RZPDp9028J031Q	CEP250	RZPDp9028J031Q	-0.0884717	7.03726	-1.40254	0.165339	0.999858	-4.4544
RZPDp9028B0715Q	RBM22	RZPDp9028B0715Q	-0.103316	6.86672	-1.4024	0.16538	0.999858	-4.45448
RZPDp9028C1511Q	ELP3	RZPDp9028C1511Q	-0.0789583	7.16514	-1.40223	0.165433	0.999858	-4.45459
RZPDp9027N012Q	PIN1	RZPDp9027N012Q	0.146579	8.4102	1.40196	0.165514	0.999858	-4.45476
RZPDp9027L1015Q	MAP2	RZPDp9027L1015Q	-0.150762	8.46372	-1.40168	0.165595	0.999858	-4.45493
RZPDp9027D132Q	PKM	RZPDp9027D132Q	0.159541	8.42771	1.39994	0.166115	0.999858	-4.45601
RZPDp9028N0520Q	TCHP	RZPDp9028N0520Q	0.29718	7.22308	1.39975	0.16617	0.999858	-4.45613
RZPDp9027I0619Q	TRAF4	RZPDp9027I0619Q	0.130632	7.44887	1.39961	0.166211	0.999858	-4.45621
RZPDp9028I122Q	NEDD4L	RZPDp9028I122Q	0.144837	7.22609	1.39941	0.166272	0.999858	-4.45634
RZPDp9027N073Q	SUGP1	RZPDp9027N073Q	0.209155	8.70657	1.39856	0.166526	0.999858	-4.45686
RZPDp9028P2119Q	FAM193A	RZPDp9028P2119Q	-0.105429	6.94551	-1.39828	0.16661	0.999858	-4.45704
RZPDp9028I145Q	ARID1A	RZPDp9028I145Q	0.250707	7.84556	1.39772	0.166777	0.999858	-4.45738
RZPDp9028L1816Q	RIF1	RZPDp9028L1816Q	-0.129507	6.76439	-1.39749	0.166847	0.999858	-4.45753
RZPDp9028P169Q	FLNA	RZPDp9028P169Q	-0.251339	7.92318	-1.39746	0.166856	0.999858	-4.45755
RZPDp9028O2113Q	RPL24	RZPDp9028O2113Q	-0.126592	7.00244	-1.39698	0.166998	0.999858	-4.45784
RZPDp9027E2214Q	SRM	RZPDp9027E2214Q	0.220538	9.5192	1.39691	0.167019	0.999858	-4.45788
RZPDp9028M2421Q	KHDRBS1	RZPDp9028M2421Q	0.0682289	6.68689	1.39691	0.16702	0.999858	-4.45789
RZPDp9028A0314Q	ADPRM	RZPDp9028A0314Q	-0.199985	7.2217	-1.39641	0.16717	0.999858	-4.4582
RZPDp9027M032Q	ACOT2	RZPDp9027M032Q	0.201886	7.99955	1.39627	0.167212	0.999858	-4.45828
RZPDp9027M0712Q	PGAP6	RZPDp9027M0712Q	0.273353	9.34243	1.39594	0.167312	0.999858	-4.45849
RZPDp9027A2015Q	EFCC1	RZPDp9027A2015Q	0.450959	10.8713	1.39591	0.167319	0.999858	-4.4585
RZPDp9027D1617Q	UFC1	RZPDp9027D1617Q	-0.361954	8.73583	-1.39536	0.167484	0.999858	-4.45884
RZPDp9028G0116Q	ZBTB44	RZPDp9028G0116Q	0.0975818	6.7877	1.3952	0.167532	0.999858	-4.45894
RZPDp9027D176Q	PMS2	RZPDp9027D176Q	0.268394	8.66663	1.39475	0.167667	0.999858	-4.45922
RZPDp9027A1715Q	HYLS1	RZPDp9027A1715Q	0.250392	8.59045	1.39466	0.167693	0.999858	-4.45927
RZPDp9028P1414Q	TMEM123	RZPDp9028P1414Q	-0.112811	7.0237	-1.39411	0.167859	0.999858	-4.45961
RZPDp9027D169Q	LPL	RZPDp9027D169Q	0.121564	7.65425	1.39331	0.1681	0.999858	-4.46011
RZPDp9027M243Q	AAR2	RZPDp9027M243Q	0.143248	7.83483	1.39298	0.168199	0.999858	-4.46031
RZPDp9028B2120Q	CNOT3	RZPDp9028B2120Q	-0.275339	8.20952	-1.39245	0.16836	0.999858	-4.46064
RZPDp9028C1417Q	PPA1	RZPDp9028C1417Q	-0.092929	6.84643	-1.39175	0.168569	0.999858	-4.46107
RZPDp9027I0312Q	CCDC149	RZPDp9027I0312Q	0.242548	9.63364	1.39161	0.168612	0.999858	-4.46115
RZPDp9027B061Q	PLCL2	RZPDp9027B061Q	0.239528	8.08362	1.39134	0.168694	0.999858	-4.46132
RZPDp9027G026Q	MRPS34	RZPDp9027G026Q	-0.174894	9.31689	-1.39091	0.168825	0.999858	-4.46159
RZPDp9028D2417Q	AIMP1	RZPDp9028D2417Q	-0.0858325	6.77887	-1.39075	0.168872	0.999858	-4.46169
RZPDp9027A037Q	KIF1A	RZPDp9027A037Q	0.155139	7.94586	1.39042	0.168973	0.999858	-4.46189
RZPDp9027E1612Q	RPL18A	RZPDp9027E1612Q	0.145323	8.19464	1.3901	0.169068	0.999858	-4.46208
RZPDp9028L083Q	IGLC3	RZPDp9028L083Q	-0.158246	7.31063	-1.39006	0.16908	0.999858	-4.46211
RZPDp9028I2114Q	GYS1	RZPDp9028I2114Q	-0.0909252	7.05811	-1.38987	0.169138	0.999858	-4.46223
RZPDp9028C0312Q	SHMT2	RZPDp9028C0312Q	-0.135842	7.29137	-1.38978	0.169167	0.999858	-4.46229
RZPDp9027H044Q	RAB3A	RZPDp9027H044Q	0.254804	8.73628	1.38939	0.169283	0.999858	-4.46252
RZPDp9028F2317Q	PNKP	RZPDp9028F2317Q	0.119034	6.95727	1.38916	0.169353	0.999858	-4.46266
RZPDp9027L209Q	RPL13A	RZPDp9027L209Q	-0.199582	9.26074	-1.38879	0.169466	0.999858	-4.46289
RZPDp9028N015Q	MPRIP	RZPDp9028N015Q	-0.429208	8.05356	-1.3883	0.169614	0.999858	-4.46319
RZPDp9027O014Q	FTH1	RZPDp9027O014Q	0.232289	9.29673	1.38821	0.169642	0.999858	-4.46325
RZPDp9027F2116Q	MAFF	RZPDp9027F2116Q	0.294015	9.37878	1.38805	0.169691	0.999858	-4.46335
RZPDp9028E0420Q	SGF29	RZPDp9028E0420Q	-0.0716488	6.71393	-1.38802	0.169699	0.999858	-4.46337
RZPDp9028J2214Q	TOMM22	RZPDp9028J2214Q	-0.133366	7.15164	-1.38781	0.169763	0.999858	-4.4635
RZPDp9028C0614Q	DNAJC10	RZPDp9028C0614Q	-0.197962	7.53057	-1.3875	0.169856	0.999858	-4.46368
RZPDp9028A189Q	DECR2	RZPDp9028A189Q	0.163718	7.59101	1.38691	0.170037	0.999858	-4.46405
RZPDp9028D203Q	SYNE2	RZPDp9028D203Q	-0.161976	7.82735	-1.38611	0.170279	0.999858	-4.46454
RZPDp9028M0117Q	KMT2A	RZPDp9028M0117Q	-0.074174	6.75722	-1.38609	0.170284	0.999858	-4.46455
RZPDp9028G166Q	NDE1	RZPDp9028G166Q	-0.226231	7.66611	-1.38582	0.170367	0.999858	-4.46472
RZPDp9027M0312Q	KTN1	RZPDp9027M0312Q	0.175808	7.74039	1.38565	0.170418	0.999858	-4.46482
RZPDp9028M025Q	FBXO41	RZPDp9028M025Q	0.171874	7.58218	1.38536	0.170506	0.999858	-4.465
RZPDp9027B197Q	TRIO	RZPDp9027B197Q	0.185197	8.28205	1.38504	0.170605	0.999858	-4.4652
RZPDp9028G2014Q	IPO4	RZPDp9028G2014Q	-0.383337	8.62127	-1.38495	0.17063	0.999858	-4.46525
RZPDp9028N036Q	AFG3L2	RZPDp9028N036Q	0.140987	7.54049	1.38487	0.170655	0.999858	-4.4653
RZPDp9027K0814Q	AAMP	RZPDp9027K0814Q	-0.288245	9.70663	-1.38472	0.170702	0.999858	-4.46539
RZPDp9028N1211Q	RIOK3	RZPDp9028N1211Q	0.102385	7.04279	1.3846	0.170738	0.999858	-4.46546
RZPDp9028O208Q	SREBF2	RZPDp9028O208Q	-0.178854	7.92636	-1.38443	0.170789	0.999858	-4.46557
RZPDp9028D1513Q	PIGO	RZPDp9028D1513Q	-0.117138	6.99099	-1.38438	0.170804	0.999858	-4.4656
RZPDp9027J0618Q	STOML2	RZPDp9027J0618Q	0.254708	8.17315	1.3841	0.170889	0.999858	-4.46577
RZPDp9027N1115Q	TUBB4A	RZPDp9027N1115Q	0.153253	8.14135	1.38409	0.170894	0.999858	-4.46578
RZPDp9028P132Q	SUMF2	RZPDp9028P132Q	0.0788894	6.87996	1.3837	0.171013	0.999858	-4.46602
RZPDp9027J2116Q	LRSAM1	RZPDp9027J2116Q	0.37549	8.91716	1.38363	0.171035	0.999858	-4.46606
RZPDp9028P1614Q	PTPN6	RZPDp9028P1614Q	-0.11143	7.2727	-1.38358	0.171048	0.999858	-4.46609
RZPDp9027G068Q	UBTD2	RZPDp9027G068Q	-0.210809	9.06009	-1.3834	0.171104	0.999858	-4.4662
RZPDp9027J1518Q	ILKAP	RZPDp9027J1518Q	0.199057	8.10357	1.38329	0.171139	0.999858	-4.46627
RZPDp9028N2316Q	EEF1B2	RZPDp9028N2316Q	0.132787	6.98249	1.3831	0.171194	0.999858	-4.46638
RZPDp9028B114Q	SEL1L3	RZPDp9028B114Q	-0.167294	7.85223	-1.38288	0.171263	0.999858	-4.46652
RZPDp9027A078Q	C9orf24	RZPDp9027A078Q	0.14777	8.73591	1.38241	0.171407	0.999858	-4.46681
RZPDp9027K126Q	ELOF1	RZPDp9027K126Q	0.140636	9.32462	1.38219	0.171474	0.999858	-4.46694
RZPDp9028C147Q	ATP2A3	RZPDp9028C147Q	-0.134939	7.26101	-1.38153	0.171674	0.999858	-4.46734
RZPDp9028L147Q	MIOS	RZPDp9028L147Q	0.147026	7.30594	1.38143	0.171707	0.999858	-4.46741
RZPDp9028I1816Q	MYO1G	RZPDp9028I1816Q	-0.140853	6.83358	-1.3813	0.171746	0.999858	-4.46749
RZPDp9027O0712Q	GPSM1	RZPDp9027O0712Q	-0.177023	8.14769	-1.38091	0.171866	0.999858	-4.46773
RZPDp9027B077Q	PHLDB1	RZPDp9027B077Q	0.139733	8.55337	1.38064	0.171949	0.999858	-4.46789
RZPDp9027F0213Q	PISD	RZPDp9027F0213Q	0.288943	9.37041	1.37979	0.172208	0.999858	-4.46841
RZPDp9027N179Q	ATXN7L3	RZPDp9027N179Q	0.229697	8.65566	1.3795	0.172297	0.999858	-4.46859
RZPDp9028L0211Q	TBCD	RZPDp9028L0211Q	-0.0804159	6.85195	-1.37914	0.172408	0.999858	-4.46881
RZPDp9028O1413Q	REST	RZPDp9028O1413Q	-0.0700033	6.92424	-1.37906	0.172432	0.999858	-4.46886
RZPDp9027J196Q	RND1	RZPDp9027J196Q	0.1679	8.38455	1.37885	0.172497	0.999858	-4.46899
RZPDp9028F1213Q	TMEM131L	RZPDp9028F1213Q	0.0709471	6.97922	1.37875	0.172528	0.999858	-4.46905
RZPDp9028K0116Q	ARF1	RZPDp9028K0116Q	-0.0908594	7.05164	-1.3785	0.172603	0.999858	-4.4692
RZPDp9028G183Q	CORO1B	RZPDp9028G183Q	0.212381	7.33043	1.37841	0.172631	0.999858	-4.46925
RZPDp9028B1617Q	HNRNPM	RZPDp9028B1617Q	-0.122635	7.01909	-1.37737	0.172952	0.999858	-4.46989
RZPDp9028A0719Q	LRIG1	RZPDp9028A0719Q	-0.120685	6.95259	-1.37704	0.173054	0.999858	-4.47009
RZPDp9028E022Q	ACSF2	RZPDp9028E022Q	0.166194	7.41033	1.37647	0.173228	0.999858	-4.47044
RZPDp9028H2120Q	SMCHD1	RZPDp9028H2120Q	-0.0652632	6.79291	-1.3763	0.173281	0.999858	-4.47054
RZPDp9028B1420Q	PUS1	RZPDp9028B1420Q	-0.230239	8.72507	-1.37616	0.173323	0.999858	-4.47063
RZPDp9027B095Q	BMERB1	RZPDp9027B095Q	0.197589	9.35072	1.37614	0.173329	0.999858	-4.47064
RZPDp9028G112Q	CBFA2T2	RZPDp9028G112Q	-0.090083	7.30021	-1.37605	0.173359	0.999858	-4.4707
RZPDp9028F216Q	NDUFS7	RZPDp9028F216Q	-0.124736	7.3451	-1.37591	0.173402	0.999858	-4.47078
RZPDp9028H123Q	PPM1G	RZPDp9028H123Q	0.0986643	7.07786	1.37574	0.173454	0.999858	-4.47088
RZPDp9028L0316Q	MRPS9	RZPDp9028L0316Q	-0.183852	7.80139	-1.37569	0.17347	0.999858	-4.47092
RZPDp9027E1514Q	GDI2	RZPDp9027E1514Q	0.237665	8.95746	1.37516	0.173633	0.999858	-4.47124
RZPDp9028F1110Q	HDLBP	RZPDp9028F1110Q	-0.093158	7.12035	-1.37506	0.173664	0.999858	-4.4713
RZPDp9028F1718Q	FAM193A	RZPDp9028F1718Q	-0.116919	6.9874	-1.37468	0.173779	0.999858	-4.47153
RZPDp9028B1721Q	CASP1	RZPDp9028B1721Q	-0.0931099	6.78981	-1.37429	0.1739	0.999858	-4.47176
RZPDp9027C158Q	KLC1	RZPDp9027C158Q	-0.262865	8.44824	-1.37428	0.173904	0.999858	-4.47177
RZPDp9028A2220Q	GSDMD	RZPDp9028A2220Q	-0.0671199	6.78638	-1.37419	0.173932	0.999858	-4.47183
RZPDp9027N1813Q	RPL29	RZPDp9027N1813Q	0.167314	8.60085	1.37415	0.173945	0.999858	-4.47185
RZPDp9027J249Q	HMGB1	RZPDp9027J249Q	0.165108	8.46298	1.37411	0.173957	0.999858	-4.47188
RZPDp9027D0912Q	ZNF577	RZPDp9027D0912Q	-0.182304	8.2498	-1.37407	0.173968	0.999858	-4.4719
RZPDp9027M038Q	AK1	RZPDp9027M038Q	0.18385	8.037	1.37376	0.174064	0.999858	-4.47209
RZPDp9028H1816Q	PHF20	RZPDp9028H1816Q	-0.139365	7.14002	-1.3737	0.174085	0.999858	-4.47213
RZPDp9028E1621Q	PRDM2	RZPDp9028E1621Q	-0.11122	7.2092	-1.37354	0.174134	0.999858	-4.47223
RZPDp9027A149Q	WDR62	RZPDp9027A149Q	0.318935	8.27935	1.37295	0.174317	0.999858	-4.47259
RZPDp9028F1517Q	APBB1	RZPDp9028F1517Q	-0.103701	7.0622	-1.37264	0.17441	0.999858	-4.47277
RZPDp9028M0215Q	RAB5C	RZPDp9028M0215Q	0.102546	6.90355	1.37258	0.174429	0.999858	-4.47281
RZPDp9028G1618Q	PHRF1	RZPDp9028G1618Q	-0.0892166	6.90954	-1.37242	0.174479	0.999858	-4.4729
RZPDp9028P2015Q	GORASP1	RZPDp9028P2015Q	-0.164754	7.93087	-1.37231	0.174514	0.999858	-4.47297
RZPDp9028D1516Q	XRCC6	RZPDp9028D1516Q	-0.164119	7.35666	-1.37185	0.174657	0.999858	-4.47325
RZPDp9028D207Q	LGALS9	RZPDp9028D207Q	-0.204341	7.78716	-1.37163	0.174726	0.999858	-4.47339
RZPDp9028O0117Q	MAZ	RZPDp9028O0117Q	-0.0847676	7.01068	-1.37136	0.174807	0.999858	-4.47355
RZPDp9028I1621Q	MAZ	RZPDp9028I1621Q	-0.374364	7.98082	-1.37017	0.175177	0.999858	-4.47427
RZPDp9028N182Q	KHSRP	RZPDp9028N182Q	0.177362	7.58448	1.37011	0.175196	0.999858	-4.47431
RZPDp9027C1715Q	RPS25	RZPDp9027C1715Q	-0.236246	9.51892	-1.37007	0.175208	0.999858	-4.47433
RZPDp9027B112Q	COPA	RZPDp9027B112Q	0.173147	8.36265	1.36964	0.175343	0.999858	-4.4746
RZPDp9028L0712Q	DENR	RZPDp9028L0712Q	-0.104244	7.03188	-1.36953	0.175376	0.999858	-4.47466
RZPDp9028D199Q	ILF3	RZPDp9028D199Q	-0.195509	7.86132	-1.36945	0.1754	0.999858	-4.47471
RZPDp9028D2215Q	RPL7	RZPDp9028D2215Q	-0.280283	8.47853	-1.36877	0.175612	0.999858	-4.47512
RZPDp9027G1414Q	PSMD4	RZPDp9027G1414Q	0.338077	9.4193	1.36858	0.175672	0.999858	-4.47524
RZPDp9027I112Q	TNPO3	RZPDp9027I112Q	0.24288	8.4045	1.36856	0.175679	0.999858	-4.47525
RZPDp9027G0916Q	H2AC6	RZPDp9027G0916Q	-0.218346	8.47336	-1.36841	0.175726	0.999858	-4.47534
RZPDp9027P096Q	TNIK	RZPDp9027P096Q	-0.248841	9.85977	-1.3684	0.175729	0.999858	-4.47535
RZPDp9028P221Q	ZNF865	RZPDp9028P221Q	-0.119629	7.41511	-1.36832	0.175753	0.999858	-4.4754
RZPDp9027M152Q	NCAPG	RZPDp9027M152Q	0.162028	8.56308	1.36816	0.175802	0.999858	-4.47549
RZPDp9027C088Q	SORBS3	RZPDp9027C088Q	-0.209642	8.3472	-1.36766	0.175958	0.999858	-4.4758
RZPDp9028J217Q	ARHGAP35	RZPDp9028J217Q	-0.16749	7.60905	-1.36744	0.176026	0.999858	-4.47593
RZPDp9028N1010Q	MIB1	RZPDp9028N1010Q	-0.188951	7.95018	-1.36657	0.176298	0.999858	-4.47646
RZPDp9028E099Q	CHMP4B	RZPDp9028E099Q	-0.15859	7.40237	-1.36593	0.176497	0.999858	-4.47684
RZPDp9028K079Q	FAAP100	RZPDp9028K079Q	0.280123	8.09598	1.3659	0.176506	0.999858	-4.47686
RZPDp9028D2119Q	SLK	RZPDp9028D2119Q	-0.199272	7.20965	-1.36556	0.176614	0.999858	-4.47707
RZPDp9027F2012Q	ADK	RZPDp9027F2012Q	0.31582	9.36785	1.3644	0.176976	0.999858	-4.47777
RZPDp9028K031Q	PDIA4	RZPDp9028K031Q	-0.116201	7.31538	-1.3642	0.177038	0.999858	-4.47789
RZPDp9028M2111Q	GRAMD1A	RZPDp9028M2111Q	-0.0756811	7.19486	-1.36409	0.177073	0.999858	-4.47796
RZPDp9028L1615Q	TRIB2	RZPDp9028L1615Q	-0.215471	7.4583	-1.36406	0.177084	0.999858	-4.47798
RZPDp9027E214Q	DYNC1I2	RZPDp9027E214Q	0.259376	8.31971	1.36386	0.177146	0.999858	-4.4781
RZPDp9027N017Q	L3MBTL2	RZPDp9027N017Q	0.303767	8.29549	1.36368	0.177202	0.999858	-4.47821
RZPDp9028L0713Q	MX1	RZPDp9028L0713Q	-0.129444	7.11993	-1.36309	0.177386	0.999858	-4.47856
RZPDp9027D172Q	MCM5	RZPDp9027D172Q	0.115227	9.45847	1.36307	0.177393	0.999858	-4.47858
RZPDp9027J143Q	CHD1L	RZPDp9027J143Q	0.170858	9.08811	1.36163	0.177845	0.999858	-4.47945
RZPDp9028J0911Q	COPE	RZPDp9028J0911Q	-0.0944078	7.31538	-1.36151	0.177883	0.999858	-4.47952
RZPDp9028L1114Q	DCP1A	RZPDp9028L1114Q	-0.232787	7.19382	-1.3612	0.17798	0.999858	-4.4797
RZPDp9027N1719Q	ADAMTS10	RZPDp9027N1719Q	0.118	7.79184	1.36114	0.177999	0.999858	-4.47974
RZPDp9028G1411Q	PRRC2C	RZPDp9028G1411Q	-0.0863243	6.86293	-1.36081	0.178105	0.999858	-4.47994
RZPDp9027H0612Q	ST7	RZPDp9027H0612Q	-0.144788	8.3105	-1.36064	0.178158	0.999858	-4.48005
RZPDp9027A0613Q	HNRNPH3	RZPDp9027A0613Q	0.169773	8.36543	1.36056	0.178183	0.999858	-4.48009
RZPDp9027K033Q	RPL12	RZPDp9027K033Q	-0.118298	8.74321	-1.36048	0.178206	0.999858	-4.48014
RZPDp9028P1215Q	KIAA2026	RZPDp9028P1215Q	0.116697	7.11081	1.36044	0.178221	0.999858	-4.48017
RZPDp9028M1210Q	MYL6	RZPDp9028M1210Q	0.179563	7.51537	1.36006	0.178339	0.999858	-4.48039
RZPDp9027C0311Q	RPL31	RZPDp9027C0311Q	-0.251122	9.74883	-1.35969	0.178455	0.999858	-4.48061
RZPDp9027O1019Q	ATCAY	RZPDp9027O1019Q	-0.109468	7.65324	-1.35957	0.178494	0.999858	-4.48069
RZPDp9028J1519Q	BIN3	RZPDp9028J1519Q	0.145223	6.92384	1.35917	0.17862	0.999858	-4.48093
RZPDp9027M245Q	MACROH2A1	RZPDp9027M245Q	0.165293	8.25567	1.35916	0.178624	0.999858	-4.48094
RZPDp9027G1312Q	SRP14	RZPDp9027G1312Q	-0.273951	9.32643	-1.35847	0.178842	0.999858	-4.48135
RZPDp9028N1616Q	GABARAP	RZPDp9028N1616Q	-0.110513	6.97678	-1.35801	0.178986	0.999858	-4.48163
RZPDp9027J0614Q	CLPTM1	RZPDp9027J0614Q	0.161487	8.43912	1.35739	0.179182	0.999858	-4.482
RZPDp9027K162Q	SNRNP70	RZPDp9027K162Q	0.124495	7.70755	1.3572	0.179242	0.999858	-4.48212
RZPDp9027C2214Q	MACROH2A2	RZPDp9027C2214Q	-0.162954	9.88191	-1.35692	0.179331	0.999858	-4.48229
RZPDp9028L1817Q	MAP1LC3B	RZPDp9028L1817Q	-0.230636	7.68423	-1.35661	0.179428	0.999858	-4.48247
RZPDp9028G2121Q	SLC25A6	RZPDp9028G2121Q	-0.0598901	6.73864	-1.35655	0.179446	0.999858	-4.48251
RZPDp9027E182Q	HPS1	RZPDp9027E182Q	0.161556	9.35612	1.35643	0.179485	0.999858	-4.48258
RZPDp9028F0315Q	RGL2	RZPDp9028F0315Q	-0.238733	7.97424	-1.35637	0.179506	0.999858	-4.48262
RZPDp9028D0913Q	HSH2D	RZPDp9028D0913Q	-0.0808971	7.07386	-1.35625	0.179542	0.999858	-4.48269
RZPDp9028P029Q	PARS2	RZPDp9028P029Q	-0.112709	7.11777	-1.35593	0.179643	0.999858	-4.48288
RZPDp9027H148Q	PES1	RZPDp9027H148Q	0.201074	8.17973	1.35589	0.179655	0.999858	-4.4829
RZPDp9028K092Q	TMEM131L	RZPDp9028K092Q	-0.0939517	7.18165	-1.35574	0.179705	0.999858	-4.483
RZPDp9028F0819Q	ACSS1	RZPDp9028F0819Q	0.21072	7.2228	1.3556	0.179749	0.999858	-4.48308
RZPDp9028J2111Q	SUMO3	RZPDp9028J2111Q	-0.0902032	7.11839	-1.35492	0.179964	0.999858	-4.48349
RZPDp9027J186Q	IMPDH1	RZPDp9027J186Q	0.246199	8.34901	1.35469	0.180035	0.999858	-4.48363
RZPDp9028P149Q	AP3D1	RZPDp9028P149Q	-0.151985	7.05254	-1.35462	0.180057	0.999858	-4.48367
RZPDp9027D1417Q	HSPA5	RZPDp9027D1417Q	0.267558	7.6797	1.3538	0.180318	0.999858	-4.48416
RZPDp9028O0816Q	DDX46	RZPDp9028O0816Q	-0.106034	7.13695	-1.35308	0.180547	0.999858	-4.48459
RZPDp9028K0920Q	PLXNA3	RZPDp9028K0920Q	-0.166372	7.85011	-1.35297	0.180583	0.999858	-4.48466
RZPDp9027C188Q	WASHC1	RZPDp9027C188Q	-0.379304	8.93551	-1.35267	0.180679	0.999858	-4.48484
RZPDp9028F1113Q	CCNDBP1	RZPDp9028F1113Q	0.232762	7.0947	1.35178	0.18096	0.999858	-4.48537
RZPDp9027J127Q	KIDINS220	RZPDp9027J127Q	0.157141	8.96183	1.35143	0.181074	0.999858	-4.48559
RZPDp9027F0519Q	ZNF284	RZPDp9027F0519Q	0.195396	8.23478	1.35136	0.181095	0.999858	-4.48563
RZPDp9027H0812Q	EEF1B2	RZPDp9027H0812Q	-0.170704	9.47225	-1.35053	0.181358	0.999858	-4.48612
RZPDp9027E1219Q	MACROH2A2	RZPDp9027E1219Q	0.191849	7.8037	1.34951	0.181686	0.999858	-4.48674
RZPDp9028A1417Q	FOXP3	RZPDp9028A1417Q	0.101644	7.09698	1.34911	0.181813	0.999858	-4.48697
RZPDp9027N0519Q	ZNF341	RZPDp9027N0519Q	0.119737	7.70711	1.34907	0.181826	0.999858	-4.487
RZPDp9028A162Q	CCDC9	RZPDp9028A162Q	0.0676072	7.10988	1.34881	0.181909	0.999858	-4.48715
RZPDp9028C108Q	SCAMP2	RZPDp9028C108Q	-0.156925	7.64759	-1.34879	0.181917	0.999858	-4.48717
RZPDp9027O214Q	SPG7	RZPDp9027O214Q	-0.208042	9.54466	-1.34853	0.181998	0.999858	-4.48732
RZPDp9027G011Q	RAN	RZPDp9027G011Q	-0.232432	8.43516	-1.34845	0.182024	0.999858	-4.48737
RZPDp9028J1419Q	BCKDHA	RZPDp9028J1419Q	0.0765144	6.61646	1.34792	0.182193	0.999858	-4.48769
RZPDp9028K2010Q	SLC29A2	RZPDp9028K2010Q	-0.118591	7.43175	-1.3477	0.182264	0.999858	-4.48782
RZPDp9028L1719Q	LLGL2	RZPDp9028L1719Q	-0.115994	6.94591	-1.34687	0.182529	0.999858	-4.48831
RZPDp9027N028Q	PJA1	RZPDp9027N028Q	0.288308	9.09862	1.3468	0.182554	0.999858	-4.48836
RZPDp9027E1118Q	PRDX1	RZPDp9027E1118Q	-0.247348	7.53739	-1.3463	0.182713	0.999858	-4.48866
RZPDp9028D1420Q	FAM171B	RZPDp9028D1420Q	-0.10419	6.79618	-1.34629	0.182715	0.999858	-4.48866
RZPDp9027C1316Q	PRADC1	RZPDp9027C1316Q	-0.145041	7.4326	-1.34623	0.182737	0.999858	-4.4887
RZPDp9027N2219Q	MYO18A	RZPDp9027N2219Q	0.236392	8.76098	1.34587	0.182849	0.999858	-4.48891
RZPDp9028H0816Q	RFC2	RZPDp9028H0816Q	-0.136425	7.09361	-1.34581	0.182869	0.999858	-4.48895
RZPDp9027K2413Q	RUNDC3A	RZPDp9027K2413Q	0.169157	8.6466	1.34559	0.18294	0.999858	-4.48908
RZPDp9028A1814Q	KCTD10	RZPDp9028A1814Q	0.0994504	7.03246	1.34506	0.183111	0.999858	-4.4894
RZPDp9027J0919Q	RPL10	RZPDp9027J0919Q	0.1988	8.67957	1.34487	0.183173	0.999858	-4.48951
RZPDp9028D1112Q	CHD2	RZPDp9028D1112Q	0.0883097	6.96206	1.34454	0.183277	0.999858	-4.48971
RZPDp9028D1019Q	TAGLN2	RZPDp9028D1019Q	-0.0859943	7.01632	-1.34418	0.183392	0.999858	-4.48992
RZPDp9028O2017Q	ACADVL	RZPDp9028O2017Q	-0.123122	6.94514	-1.3438	0.183515	0.999858	-4.49015
RZPDp9028L021Q	PEX1	RZPDp9028L021Q	0.285109	7.51421	1.34378	0.183523	0.999858	-4.49016
RZPDp9027J0812Q	C2CD3	RZPDp9027J0812Q	0.187736	8.46766	1.34374	0.183536	0.999858	-4.49019
RZPDp9028C1514Q	UBR1	RZPDp9028C1514Q	-0.274673	7.83015	-1.34343	0.183634	0.999858	-4.49037
RZPDp9027M172Q	RBM5	RZPDp9027M172Q	0.262987	8.89208	1.34341	0.183643	0.999858	-4.49038
RZPDp9028G114Q	WDTC1	RZPDp9028G114Q	-0.202472	8.478	-1.34326	0.183689	0.999858	-4.49047
RZPDp9028H053Q	CLSTN1	RZPDp9028H053Q	-0.127489	7.20519	-1.34322	0.183702	0.999858	-4.49049
RZPDp9028B0317Q	RUNX3	RZPDp9028B0317Q	-0.206775	7.85341	-1.34307	0.18375	0.999858	-4.49058
RZPDp9027A228Q	ARMCX1	RZPDp9027A228Q	0.200331	9.24594	1.34282	0.183833	0.999858	-4.49074
RZPDp9027I079Q	HERPUD1	RZPDp9027I079Q	0.178041	8.44907	1.34249	0.183937	0.999858	-4.49093
RZPDp9028C0619Q	TPR	RZPDp9028C0619Q	-0.0842261	6.81205	-1.34245	0.183949	0.999858	-4.49095
RZPDp9028A203Q	BCAM	RZPDp9028A203Q	-0.0891222	7.00361	-1.34244	0.183954	0.999858	-4.49096
RZPDp9028H2116Q	ARHGEF18	RZPDp9028H2116Q	-0.197141	7.29447	-1.34233	0.183989	0.999858	-4.49103
RZPDp9028E2415Q	L3HYPDH	RZPDp9028E2415Q	-0.202692	7.98686	-1.3418	0.184161	0.999858	-4.49134
RZPDp9028F1119Q	NOP53	RZPDp9028F1119Q	0.106264	6.85424	1.34176	0.184174	0.999858	-4.49137
RZPDp9028M0720Q	VCP	RZPDp9028M0720Q	-0.0693825	6.78227	-1.34127	0.184331	0.999858	-4.49166
RZPDp9028P212Q	GRN	RZPDp9028P212Q	-0.105667	7.0975	-1.34126	0.184336	0.999858	-4.49167
RZPDp9027O1219Q	KLC1	RZPDp9027O1219Q	-0.245723	8.42197	-1.3412	0.184354	0.999858	-4.4917
RZPDp9028O0721Q	ASXL1	RZPDp9028O0721Q	-0.123986	7.21762	-1.34119	0.184356	0.999858	-4.4917
RZPDp9028P1318Q	MGA	RZPDp9028P1318Q	-0.0840194	6.8179	-1.34112	0.184382	0.999858	-4.49175
RZPDp9027F212Q	PCM1	RZPDp9027F212Q	0.149222	9.30328	1.34098	0.184427	0.999858	-4.49183
RZPDp9028G022Q	ATF6B	RZPDp9028G022Q	-0.112704	7.25839	-1.34091	0.184448	0.999858	-4.49187
RZPDp9027N0517Q	DPYSL5	RZPDp9027N0517Q	-0.166084	7.55199	-1.34088	0.184457	0.999858	-4.49189
RZPDp9027J227Q	RPS21	RZPDp9027J227Q	-0.161465	8.47102	-1.3408	0.184484	0.999858	-4.49194
RZPDp9027G013Q	RPS3	RZPDp9027G013Q	-0.136903	8.09692	-1.34012	0.184703	0.999858	-4.49234
RZPDp9028B191Q	FGFR3	RZPDp9028B191Q	0.141335	7.15662	1.3401	0.18471	0.999858	-4.49236
RZPDp9028G098Q	VBP1	RZPDp9028G098Q	-0.188735	7.50383	-1.33942	0.184929	0.999858	-4.49276
RZPDp9027A185Q	EDF1	RZPDp9027A185Q	0.175058	8.55468	1.33934	0.184955	0.999858	-4.49281
RZPDp9028D0519Q	COL5A2	RZPDp9028D0519Q	-0.118559	6.91459	-1.33894	0.185086	0.999858	-4.49305
RZPDp9028L1717Q	HLA-A	RZPDp9028L1717Q	-0.110022	6.97087	-1.33891	0.185094	0.999858	-4.49306
RZPDp9028M1621Q	AKAP17A	RZPDp9028M1621Q	-0.126643	7.28225	-1.33865	0.18518	0.999858	-4.49322
RZPDp9028O1416Q	TOMM22	RZPDp9028O1416Q	-0.0848521	6.81539	-1.3385	0.185227	0.999858	-4.4933
RZPDp9028H1116Q	CYFIP2	RZPDp9028H1116Q	-0.134751	7.0922	-1.33814	0.185343	0.999858	-4.49352
RZPDp9027J198Q	KCMF1	RZPDp9027J198Q	0.283987	9.35725	1.33798	0.185398	0.999858	-4.49362
RZPDp9028N0315Q	DDX3Y	RZPDp9028N0315Q	-0.0888775	6.936	-1.33699	0.185718	0.999858	-4.4942
RZPDp9028A2211Q	PPP1R21	RZPDp9028A2211Q	0.1055	7.24217	1.33689	0.185751	0.999858	-4.49426
RZPDp9027F188Q	KRI1	RZPDp9027F188Q	0.209793	9.24771	1.33684	0.185767	0.999858	-4.49429
RZPDp9027B0619Q	RAB5C	RZPDp9027B0619Q	0.260611	8.96968	1.33676	0.185792	0.999858	-4.49434
RZPDp9028F214Q	BGN	RZPDp9028F214Q	-0.165117	8.49087	-1.33635	0.185927	0.999858	-4.49459
RZPDp9027E0519Q	HMGN1	RZPDp9027E0519Q	0.133259	7.56227	1.3361	0.186008	0.999858	-4.49473
RZPDp9028A033Q	TACC2	RZPDp9028A033Q	0.0882978	7.12852	1.33599	0.186043	0.999858	-4.4948
RZPDp9027E235Q	MEST	RZPDp9027E235Q	0.189598	8.87161	1.33531	0.186264	0.999858	-4.4952
RZPDp9027I1515Q	MEIS3	RZPDp9027I1515Q	0.268319	9.39408	1.33526	0.186279	0.999858	-4.49523
RZPDp9027E2320Q	DLG4	RZPDp9027E2320Q	0.0846073	7.1193	1.33438	0.186566	0.999858	-4.49575
RZPDp9027C2213Q	SNRPD1	RZPDp9027C2213Q	-0.218607	8.62507	-1.33437	0.186571	0.999858	-4.49576
RZPDp9028C179Q	HNRNPUL1	RZPDp9028C179Q	-0.132326	7.4427	-1.33426	0.186607	0.999858	-4.49583
RZPDp9027F194Q	R3HCC1	RZPDp9027F194Q	0.14281	9.44963	1.33409	0.186661	0.999858	-4.49592
RZPDp9027E1819Q	HSD17B10	RZPDp9027E1819Q	0.141452	7.63138	1.33394	0.186712	0.999858	-4.49602
RZPDp9027K0320Q	PRKAG1	RZPDp9027K0320Q	-0.1894	7.7552	-1.33389	0.186726	0.999858	-4.49604
RZPDp9028B112Q	CDKN1A	RZPDp9028B112Q	0.15469	7.20698	1.33389	0.186728	0.999858	-4.49605
RZPDp9028L0212Q	PDS5A	RZPDp9028L0212Q	0.145023	6.98436	1.33365	0.186805	0.999858	-4.49619
RZPDp9027F0215Q	HIP1R	RZPDp9027F0215Q	0.222364	9.03592	1.33347	0.186864	0.999858	-4.49629
RZPDp9028I097Q	SYNE1	RZPDp9028I097Q	-0.160795	7.85452	-1.33326	0.186933	0.999858	-4.49642
RZPDp9028D0317Q	HERPUD1	RZPDp9028D0317Q	-0.0781924	6.78067	-1.33292	0.187042	0.999858	-4.49662
RZPDp9028J165Q	RPS19	RZPDp9028J165Q	-0.247739	9.04204	-1.33279	0.187084	0.999858	-4.49669
RZPDp9027O0610Q	PHLPP1	RZPDp9027O0610Q	-0.19437	9.28596	-1.33259	0.18715	0.999858	-4.49681
RZPDp9027M153Q	FASN	RZPDp9027M153Q	0.256996	7.76655	1.33258	0.187153	0.999858	-4.49682
RZPDp9028I2011Q	LPXN	RZPDp9028I2011Q	-0.171623	7.76125	-1.33229	0.187247	0.999858	-4.49699
RZPDp9028B162Q	COL4A2	RZPDp9028B162Q	-0.093541	7.57806	-1.33116	0.187618	0.999858	-4.49766
RZPDp9028G0219Q	F8A1	RZPDp9028G0219Q	-0.0716922	6.74198	-1.33105	0.187655	0.999858	-4.49773
RZPDp9028E1316Q	ADNP	RZPDp9028E1316Q	-0.115424	7.28549	-1.33036	0.18788	0.999858	-4.49813
RZPDp9028I0310Q	BRD3	RZPDp9028I0310Q	-0.115902	7.17981	-1.33012	0.18796	0.999858	-4.49828
RZPDp9028L2010Q	HMGN1	RZPDp9028L2010Q	-0.159575	7.60127	-1.32881	0.188387	0.999858	-4.49905
RZPDp9027E0414Q	AP2M1	RZPDp9027E0414Q	0.255239	9.9315	1.32877	0.188402	0.999858	-4.49907
RZPDp9028J1811Q	IFNGR1	RZPDp9028J1811Q	-0.0790421	7.0837	-1.3283	0.188554	0.999858	-4.49935
RZPDp9028L1720Q	RNA28SN3	RZPDp9028L1720Q	-0.0823704	6.80936	-1.32825	0.188574	0.999858	-4.49938
RZPDp9027B039Q	PTPRK	RZPDp9027B039Q	0.227953	8.61702	1.32824	0.188576	0.999858	-4.49938
RZPDp9028P085Q	PITPNM1	RZPDp9028P085Q	-0.20489	7.91032	-1.32816	0.188602	0.999858	-4.49943
RZPDp9028L0618Q	FOS	RZPDp9028L0618Q	-0.105486	6.76649	-1.32764	0.188773	0.999858	-4.49974
RZPDp9027P1514Q	WDR77	RZPDp9027P1514Q	-0.308172	8.63798	-1.32698	0.18899	0.999858	-4.50013
RZPDp9028N1617Q	ACTR1B	RZPDp9028N1617Q	-0.110576	7.18537	-1.32687	0.189026	0.999858	-4.50019
RZPDp9028F183Q	SIRT7	RZPDp9028F183Q	0.102842	7.54952	1.32604	0.189299	0.999858	-4.50068
RZPDp9028C217Q	NOTCH1	RZPDp9028C217Q	-0.156983	7.48276	-1.32597	0.189322	0.999858	-4.50072
RZPDp9027N1519Q	CAPZB	RZPDp9027N1519Q	0.145054	7.59961	1.32583	0.189368	0.999858	-4.5008
RZPDp9028A2216Q	ARRB2	RZPDp9028A2216Q	-0.107054	7.37098	-1.32577	0.189387	0.999858	-4.50084
RZPDp9028P0412Q	USP7	RZPDp9028P0412Q	0.14667	6.97378	1.32559	0.189449	0.999858	-4.50095
RZPDp9027F0612Q	APLP2	RZPDp9027F0612Q	0.144963	8.26575	1.32551	0.189476	0.999858	-4.501
RZPDp9028N0517Q	RBM8A	RZPDp9028N0517Q	-0.0963666	6.96459	-1.32526	0.189555	0.999858	-4.50114
RZPDp9027N168Q	NUMA1	RZPDp9027N168Q	0.133803	8.40933	1.32524	0.189562	0.999858	-4.50115
RZPDp9027E169Q	DNAJA1	RZPDp9027E169Q	0.234836	8.87167	1.32503	0.189631	0.999858	-4.50128
RZPDp9028I235Q	DNAI3	RZPDp9028I235Q	-0.174927	8.77992	-1.32481	0.189706	0.999858	-4.50141
RZPDp9027E244Q	MLLT10	RZPDp9027E244Q	0.17888	9.15829	1.3248	0.189709	0.999858	-4.50141
RZPDp9028I013Q	SAMD4B	RZPDp9028I013Q	0.0865003	6.83585	1.32469	0.189744	0.999858	-4.50148
RZPDp9028D0917Q	EPHX2	RZPDp9028D0917Q	-0.191013	7.68632	-1.32462	0.189767	0.999858	-4.50152
RZPDp9027A066Q	PSMD10	RZPDp9027A066Q	0.252688	9.0235	1.3246	0.189773	0.999858	-4.50153
RZPDp9028H0915Q	EIF1	RZPDp9028H0915Q	-0.0904064	6.90653	-1.32382	0.190031	0.999858	-4.50199
RZPDp9028M1618Q	RSAD1	RZPDp9028M1618Q	-0.112662	6.84143	-1.3236	0.190103	0.999858	-4.50212
RZPDp9028C1012Q	ILF3	RZPDp9028C1012Q	-0.0717252	6.97294	-1.32299	0.190307	0.999858	-4.50248
RZPDp9027K0218Q	PSMD2	RZPDp9027K0218Q	-0.0816438	7.37879	-1.32235	0.190519	0.999858	-4.50286
RZPDp9028E0117Q	RHOG	RZPDp9028E0117Q	0.162719	6.63389	1.32216	0.19058	0.999858	-4.50296
RZPDp9028G068Q	SH3BGRL3	RZPDp9028G068Q	-0.190679	7.6168	-1.32189	0.190671	0.999858	-4.50313
RZPDp9028O153Q	NCOR1	RZPDp9028O153Q	-0.113336	7.05187	-1.32087	0.191008	0.999858	-4.50372
RZPDp9028A1821Q	ATXN1	RZPDp9028A1821Q	-0.129105	7.39876	-1.32065	0.191082	0.999858	-4.50385
RZPDp9027K2015Q	RPS7	RZPDp9027K2015Q	-0.282224	8.43299	-1.32031	0.191195	0.999858	-4.50405
RZPDp9028D092Q	DAB2IP	RZPDp9028D092Q	-0.130676	7.27145	-1.32015	0.191249	0.999858	-4.50415
RZPDp9028I0317Q	FOSB	RZPDp9028I0317Q	0.149535	6.97554	1.32011	0.191262	0.999858	-4.50417
RZPDp9028C0910Q	HMGXB3	RZPDp9028C0910Q	-0.121495	7.34889	-1.32008	0.191272	0.999858	-4.50419
RZPDp9027F1819Q	DNTTIP2	RZPDp9027F1819Q	0.238514	8.40874	1.31975	0.191379	0.999858	-4.50438
RZPDp9028G1319Q	MKLN1	RZPDp9028G1319Q	-0.215581	7.10085	-1.31964	0.191416	0.999858	-4.50444
RZPDp9028D0219Q	CORO1B	RZPDp9028D0219Q	-0.0892613	6.79659	-1.31963	0.191421	0.999858	-4.50445
RZPDp9027B036Q	ARHGAP33	RZPDp9027B036Q	0.21944	8.63207	1.31935	0.191513	0.999858	-4.50462
RZPDp9028C165Q	NCOR2	RZPDp9028C165Q	-0.156483	7.87293	-1.31895	0.191645	0.999858	-4.50485
RZPDp9028J2220Q	RFX1	RZPDp9028J2220Q	-0.146156	6.89887	-1.31878	0.191703	0.999858	-4.50495
RZPDp9027D1115Q	MPST	RZPDp9027D1115Q	-0.235508	8.8513	-1.31869	0.191732	0.999858	-4.505
RZPDp9028M134Q	MAP4K4	RZPDp9028M134Q	0.166427	7.34163	1.31834	0.19185	0.999858	-4.50521
RZPDp9028D1819Q	C19orf54	RZPDp9028D1819Q	-0.0952668	6.85308	-1.31761	0.192093	0.999858	-4.50564
RZPDp9028O087Q	RPL12	RZPDp9028O087Q	-0.170909	7.77627	-1.31744	0.192149	0.999858	-4.50574
RZPDp9027J2419Q	FEZ1	RZPDp9027J2419Q	0.323302	9.36935	1.31697	0.192304	0.999858	-4.50601
RZPDp9028I1210Q	MEGF8	RZPDp9028I1210Q	0.176489	7.51518	1.31693	0.192319	0.999858	-4.50604
RZPDp9027D1413Q	BAIAP2	RZPDp9027D1413Q	0.16424	7.74231	1.31683	0.192353	0.999858	-4.5061
RZPDp9028C228Q	TUFM	RZPDp9028C228Q	-0.142116	6.9919	-1.31627	0.192539	0.999858	-4.50642
RZPDp9028L0815Q	TALDO1	RZPDp9028L0815Q	-0.192353	7.8027	-1.31604	0.192616	0.999858	-4.50656
RZPDp9028K1419Q	RAPGEF6	RZPDp9028K1419Q	-0.113558	6.74171	-1.3155	0.192796	0.999858	-4.50687
RZPDp9028O139Q	CCDC88B	RZPDp9028O139Q	-0.198534	7.80287	-1.31489	0.193001	0.999858	-4.50723
RZPDp9028M0817Q	PRKCH	RZPDp9028M0817Q	-0.203424	7.74901	-1.3145	0.19313	0.999858	-4.50746
RZPDp9028A1918Q	JMJD7-PLA2G4B	RZPDp9028A1918Q	-0.133255	7.14321	-1.31355	0.193449	0.999858	-4.50801
RZPDp9028G1415Q	RUBCN	RZPDp9028G1415Q	-0.14594	7.41233	-1.31301	0.19363	0.999858	-4.50833
RZPDp9028E0118Q	SMARCC2	RZPDp9028E0118Q	-0.061332	6.31872	-1.31282	0.193691	0.999858	-4.50844
RZPDp9027F0617Q	BCL11A	RZPDp9027F0617Q	0.144769	7.70745	1.31264	0.193754	0.999858	-4.50855
RZPDp9028K0821Q	CNN2	RZPDp9028K0821Q	-0.180983	7.42536	-1.31258	0.193772	0.999858	-4.50858
RZPDp9028K245Q	TBC1D2	RZPDp9028K245Q	-0.180565	7.78936	-1.31246	0.193813	0.999858	-4.50865
RZPDp9027L2310Q	TRO	RZPDp9027L2310Q	-0.223653	8.99305	-1.31226	0.19388	0.999858	-4.50876
RZPDp9028H0813Q	HLA-B	RZPDp9028H0813Q	-0.145886	7.13669	-1.3122	0.1939	0.999858	-4.5088
RZPDp9028O2116Q	PRKD2	RZPDp9028O2116Q	-0.144306	7.05555	-1.31193	0.193991	0.999858	-4.50896
RZPDp9028C236Q	ODR4	RZPDp9028C236Q	-0.158137	7.51499	-1.31188	0.194008	0.999858	-4.50899
RZPDp9028J1918Q	HLA-B	RZPDp9028J1918Q	0.0761847	6.87271	1.3107	0.194405	0.999858	-4.50968
RZPDp9028B091Q	MAFF	RZPDp9028B091Q	0.174224	7.55204	1.31012	0.1946	0.999858	-4.51001
RZPDp9027E1911Q	GARS1	RZPDp9027E1911Q	0.268602	9.12661	1.30995	0.194656	0.999858	-4.51011
RZPDp9028M188Q	PARP1	RZPDp9028M188Q	-0.0976878	7.33761	-1.30983	0.194698	0.999858	-4.51018
RZPDp9028H1817Q	SLBP	RZPDp9028H1817Q	-0.137258	6.93318	-1.30975	0.194722	0.999858	-4.51023
RZPDp9028D1916Q	RPL7	RZPDp9028D1916Q	-0.12317	7.05905	-1.30938	0.194849	0.999858	-4.51045
RZPDp9028A1418Q	KDM5A	RZPDp9028A1418Q	0.0960281	6.76646	1.30923	0.1949	0.999858	-4.51054
RZPDp9028L1017Q	HNRNPM	RZPDp9028L1017Q	-0.163981	7.27548	-1.3089	0.195011	0.999858	-4.51073
RZPDp9027H0819Q	HYDIN	RZPDp9027H0819Q	-0.199113	7.60433	-1.30889	0.195014	0.999858	-4.51073
RZPDp9027N2015Q	HMGN1	RZPDp9027N2015Q	0.238025	9.53265	1.30886	0.195024	0.999858	-4.51075
RZPDp9028O0214Q	TRAF1	RZPDp9028O0214Q	-0.0819662	6.86159	-1.30873	0.195069	0.999858	-4.51083
RZPDp9028E1411Q	RALBP1	RZPDp9028E1411Q	0.361528	7.38497	1.30842	0.195172	0.999858	-4.511
RZPDp9028F0414Q	WWP2	RZPDp9028F0414Q	-0.171591	7.72692	-1.30822	0.19524	0.999858	-4.51112
RZPDp9028E058Q	SCML4	RZPDp9028E058Q	0.1253	7.29937	1.30711	0.195615	0.999858	-4.51177
RZPDp9027O246Q	BCL7A	RZPDp9027O246Q	0.172767	9.3117	1.30676	0.195732	0.999858	-4.51197
RZPDp9028K153Q	PPWD1	RZPDp9028K153Q	-0.0906407	7.01783	-1.30665	0.195768	0.999858	-4.51203
RZPDp9027P2416Q	CDK5RAP3	RZPDp9027P2416Q	-0.175078	9.26723	-1.30617	0.195933	0.999858	-4.51232
RZPDp9028P084Q	KCNT1	RZPDp9028P084Q	-0.14856	8.62192	-1.30602	0.195981	0.999858	-4.5124
RZPDp9027N0416Q	FKBP15	RZPDp9027N0416Q	0.159268	8.48984	1.30601	0.195984	0.999858	-4.5124
RZPDp9027I032Q	RASGEF1B	RZPDp9027I032Q	0.132237	7.80459	1.30595	0.196005	0.999858	-4.51244
RZPDp9028K019Q	QARS1	RZPDp9028K019Q	-0.327228	7.78504	-1.3059	0.196022	0.999858	-4.51247
RZPDp9028H2416Q	DDX42	RZPDp9028H2416Q	-0.0621024	6.72902	-1.30586	0.196037	0.999858	-4.51249
RZPDp9028J1919Q	SLX1A	RZPDp9028J1919Q	0.124946	7.248	1.30551	0.196156	0.999858	-4.5127
RZPDp9028M248Q	CIRBP	RZPDp9028M248Q	0.160844	7.56985	1.30543	0.19618	0.999858	-4.51274
RZPDp9027N056Q	MAP1S	RZPDp9027N056Q	0.194654	10.4632	1.30535	0.196209	0.999858	-4.51279
RZPDp9028I1414Q	WASHC1	RZPDp9028I1414Q	-0.195059	7.66819	-1.30527	0.196237	0.999858	-4.51284
RZPDp9028P0316Q	ANXA11	RZPDp9028P0316Q	0.204983	7.23936	1.30451	0.196493	0.999858	-4.51328
RZPDp9027G207Q	NAB2	RZPDp9027G207Q	0.187271	8.8086	1.30426	0.196577	0.999858	-4.51342
RZPDp9028N0613Q	CDV3	RZPDp9028N0613Q	-0.105673	7.05963	-1.30384	0.19672	0.999858	-4.51367
RZPDp9028N2015Q	TADA2B	RZPDp9028N2015Q	-0.235192	8.66268	-1.3036	0.196803	0.999858	-4.51381
RZPDp9027D155Q	AMN1	RZPDp9027D155Q	0.16093	9.41459	1.30282	0.197068	0.999858	-4.51426
RZPDp9028F095Q	MMP14	RZPDp9028F095Q	-0.146656	8.14183	-1.30259	0.197143	0.999858	-4.51439
RZPDp9028P177Q	CENPT	RZPDp9028P177Q	-0.228517	7.47519	-1.30231	0.197239	0.999858	-4.51455
RZPDp9028C065Q	KATNB1	RZPDp9028C065Q	-0.175949	9.08346	-1.30219	0.197281	0.999858	-4.51463
RZPDp9028M1020Q	ARNT	RZPDp9028M1020Q	-0.177454	6.85121	-1.30217	0.197286	0.999858	-4.51463
RZPDp9027D1212Q	MLLT3	RZPDp9027D1212Q	-0.190213	8.64767	-1.30214	0.197296	0.999858	-4.51465
RZPDp9028O0916Q	OSER1	RZPDp9028O0916Q	-0.0801342	6.91726	-1.30183	0.197405	0.999858	-4.51484
RZPDp9028K2213Q	ATP5F1B	RZPDp9028K2213Q	-0.122102	6.8522	-1.3017	0.197446	0.999858	-4.51491
RZPDp9028L1515Q	NUP160	RZPDp9028L1515Q	0.186549	7.21888	1.30165	0.197466	0.999858	-4.51494
RZPDp9028K1913Q	TRIB1	RZPDp9028K1913Q	-0.0779007	7.11951	-1.30136	0.197561	0.999858	-4.5151
RZPDp9028B1615Q	GOLGA7	RZPDp9028B1615Q	-0.116528	7.18531	-1.30124	0.197604	0.999858	-4.51517
RZPDp9028C1617Q	TXNIP	RZPDp9028C1617Q	-0.0955606	6.79457	-1.30091	0.197714	0.999858	-4.51536
RZPDp9028M174Q	EEF1G	RZPDp9028M174Q	0.186578	8.01845	1.30089	0.197722	0.999858	-4.51538
RZPDp9027N134Q	LDHA	RZPDp9027N134Q	-0.18395	8.27471	-1.3005	0.197854	0.999858	-4.5156
RZPDp9027F0811Q	ADK	RZPDp9027F0811Q	0.39042	10.7317	1.29987	0.198071	0.999858	-4.51597
RZPDp9028D1817Q	PDXDC2P-NPIPB14P	RZPDp9028D1817Q	-0.146217	6.96774	-1.29966	0.198143	0.999858	-4.51609
RZPDp9027K0617Q	RNF114	RZPDp9027K0617Q	-0.155897	9.00171	-1.29953	0.198188	0.999858	-4.51617
RZPDp9028D0820Q	KIAA1191	RZPDp9028D0820Q	-0.0759703	6.88348	-1.29941	0.198226	0.999858	-4.51623
RZPDp9027O2315Q	PUM2	RZPDp9027O2315Q	-0.166745	10.5235	-1.29922	0.198291	0.999858	-4.51634
RZPDp9028G0914Q	RPL12	RZPDp9028G0914Q	-0.292591	9.11481	-1.29914	0.198318	0.999858	-4.51639
RZPDp9028G1014Q	ARPC4	RZPDp9028G1014Q	-0.169839	7.70873	-1.29906	0.198345	0.999858	-4.51643
RZPDp9028I035Q	KIFC3	RZPDp9028I035Q	0.249593	7.94347	1.29902	0.198359	0.999858	-4.51646
RZPDp9027A0516Q	RABEP2	RZPDp9027A0516Q	0.239467	8.65944	1.29896	0.198379	0.999858	-4.51649
RZPDp9028L0513Q	ACTG1	RZPDp9028L0513Q	-0.0614069	6.84635	-1.29895	0.198385	0.999858	-4.5165
RZPDp9027G1110Q	APOA1	RZPDp9027G1110Q	-0.16314	9.19436	-1.29893	0.19839	0.999858	-4.51651
RZPDp9028E0918Q	NSD3	RZPDp9028E0918Q	0.111628	6.34984	1.29807	0.198685	0.999858	-4.51701
RZPDp9028B163Q	DUSP1	RZPDp9028B163Q	-0.0801556	7.23868	-1.29799	0.198712	0.999858	-4.51706
RZPDp9027F1411Q	RPS21	RZPDp9027F1411Q	0.226425	8.71615	1.29729	0.19895	0.999858	-4.51746
RZPDp9028O166Q	CTNNA1	RZPDp9028O166Q	-0.141071	7.60179	-1.29706	0.19903	0.999858	-4.51759
RZPDp9028G1712Q	BET1L	RZPDp9028G1712Q	-0.129008	7.3586	-1.29657	0.199199	0.999858	-4.51788
RZPDp9027C0819Q	SIRT2	RZPDp9027C0819Q	-0.142278	7.84655	-1.29646	0.199234	0.999858	-4.51794
RZPDp9027J0415Q	UCKL1	RZPDp9027J0415Q	0.216478	9.80631	1.2958	0.199461	0.999858	-4.51832
RZPDp9027I126Q	POLR3K	RZPDp9027I126Q	0.217034	8.77614	1.29495	0.199754	0.999858	-4.51881
RZPDp9028K2210Q	ACAT2	RZPDp9028K2210Q	-0.129034	7.43532	-1.29492	0.199763	0.999858	-4.51883
RZPDp9028M1014Q	STN1	RZPDp9028M1014Q	0.083611	7.16176	1.29452	0.199899	0.999858	-4.51906
RZPDp9028B227Q	PRDX5	RZPDp9028B227Q	-0.148925	7.63558	-1.2939	0.200112	0.999858	-4.51941
RZPDp9028F1912Q	RAC1	RZPDp9028F1912Q	-0.065973	6.81145	-1.29385	0.200129	0.999858	-4.51944
RZPDp9028B1016Q	ATF4	RZPDp9028B1016Q	-0.0967911	6.96846	-1.29336	0.200299	0.999858	-4.51973
RZPDp9027I1410Q	NBEA	RZPDp9027I1410Q	0.124132	7.53799	1.29333	0.20031	0.999858	-4.51974
RZPDp9028M055Q	SMG5	RZPDp9028M055Q	0.120597	7.01159	1.2933	0.20032	0.999858	-4.51976
RZPDp9027G043Q	DHX16	RZPDp9027G043Q	-0.141498	8.63816	-1.29325	0.200338	0.999858	-4.51979
RZPDp9028A1217Q	SPAG7	RZPDp9028A1217Q	0.113396	6.93094	1.29286	0.200471	0.999858	-4.52001
RZPDp9027N1913Q	WBP1L	RZPDp9027N1913Q	0.232875	9.09122	1.2927	0.200526	0.999858	-4.52011
RZPDp9027J022Q	KIDINS220	RZPDp9027J022Q	0.141826	8.53056	1.29268	0.200532	0.999858	-4.52012
RZPDp9028H1010Q	TOP3B	RZPDp9028H1010Q	-0.137988	7.23955	-1.29214	0.200717	0.999858	-4.52043
RZPDp9027N1619Q	NT5DC2	RZPDp9027N1619Q	0.191734	8.00011	1.29169	0.200874	0.999858	-4.52069
RZPDp9027A1714Q	DYNLL1	RZPDp9027A1714Q	0.240423	10.1282	1.29145	0.200956	0.999858	-4.52083
RZPDp9028I0720Q	RNF166	RZPDp9028I0720Q	-0.126544	7.00578	-1.291	0.201109	0.999858	-4.52108
RZPDp9028L211Q	GALNT10	RZPDp9028L211Q	-0.250348	7.89298	-1.29074	0.201201	0.999858	-4.52123
RZPDp9027B099Q	KANK3	RZPDp9027B099Q	0.163446	9.01675	1.29059	0.201252	0.999858	-4.52132
RZPDp9028K0416Q	NR4A2	RZPDp9028K0416Q	-0.104219	6.73856	-1.29056	0.201264	0.999858	-4.52134
RZPDp9027B062Q	AAAS	RZPDp9027B062Q	0.156263	9.02319	1.29044	0.201302	0.999858	-4.5214
RZPDp9028J0318Q	ZNF101	RZPDp9028J0318Q	0.122154	6.88128	1.29041	0.201315	0.999858	-4.52142
RZPDp9028A1919Q	PLEC	RZPDp9028A1919Q	-0.0588317	6.79055	-1.28922	0.201726	0.999858	-4.52211
RZPDp9028P2110Q	SCAF1	RZPDp9028P2110Q	-0.0838138	7.18023	-1.28864	0.201925	0.999858	-4.52244
RZPDp9028H0913Q	CANX	RZPDp9028H0913Q	-0.0952647	6.89462	-1.28856	0.201952	0.999858	-4.52248
RZPDp9027E023Q	CDC37	RZPDp9027E023Q	0.150577	8.76518	1.28843	0.201997	0.999858	-4.52256
RZPDp9028M2112Q	PRPF8	RZPDp9028M2112Q	-0.106738	7.00707	-1.2883	0.202042	0.999858	-4.52263
RZPDp9027C0617Q	PFN1	RZPDp9027C0617Q	-0.130285	8.59112	-1.28791	0.202177	0.999858	-4.52286
RZPDp9028L1019Q	HSPA8	RZPDp9028L1019Q	-0.141174	7.32066	-1.28791	0.202178	0.999858	-4.52286
RZPDp9028L1410Q	IGHMBP2	RZPDp9028L1410Q	-0.123513	7.2633	-1.28782	0.202211	0.999858	-4.52291
RZPDp9028B1815Q	RGS14	RZPDp9028B1815Q	-0.152543	7.19857	-1.28741	0.20235	0.999858	-4.52314
RZPDp9028K2221Q	CYFIP2	RZPDp9028K2221Q	-0.0961002	6.83305	-1.28718	0.202429	0.999858	-4.52328
RZPDp9028C2420Q	SEPTIN9	RZPDp9028C2420Q	0.141644	6.91866	1.28704	0.20248	0.999858	-4.52336
RZPDp9027K099Q	RPL26	RZPDp9027K099Q	-0.26063	9.33276	-1.28697	0.202502	0.999858	-4.5234
RZPDp9027I1518Q	ZNF232	RZPDp9027I1518Q	0.4216	9.26488	1.28694	0.202514	0.999858	-4.52342
RZPDp9028K086Q	MMRN2	RZPDp9028K086Q	-0.133719	7.17208	-1.28682	0.202556	0.999858	-4.52349
RZPDp9027D1112Q	WASHC1	RZPDp9027D1112Q	-0.159449	9.16452	-1.28635	0.202718	0.999858	-4.52375
RZPDp9028N1116Q	RPL11	RZPDp9028N1116Q	-0.225681	7.86245	-1.28615	0.202789	0.999858	-4.52387
RZPDp9027D135Q	PTPN23	RZPDp9027D135Q	-0.140557	7.40048	-1.28602	0.202834	0.999858	-4.52394
RZPDp9027B0119Q	GET3	RZPDp9027B0119Q	-0.259863	8.63457	-1.2859	0.202875	0.999858	-4.52401
RZPDp9028D0517Q	BCL3	RZPDp9028D0517Q	-0.0994364	6.91196	-1.28497	0.2032	0.999858	-4.52455
RZPDp9027E0417Q	PRMT1	RZPDp9027E0417Q	0.183668	9.16971	1.28495	0.203204	0.999858	-4.52455
RZPDp9028E1820Q	TOR1AIP1	RZPDp9028E1820Q	-0.102645	6.87775	-1.28444	0.203382	0.999858	-4.52485
RZPDp9028N0418Q	NOTCH2NLB	RZPDp9028N0418Q	0.0632382	6.81897	1.28413	0.203489	0.999858	-4.52502
RZPDp9027C1720Q	SLC25A4	RZPDp9027C1720Q	-0.178493	8.05976	-1.28404	0.203522	0.999858	-4.52508
RZPDp9027F1714Q	ARRDC1-AS1	RZPDp9027F1714Q	0.165001	9.88097	1.28314	0.203833	0.999858	-4.52559
RZPDp9028M2215Q	NLRP1	RZPDp9028M2215Q	-0.113057	7.55614	-1.28285	0.203936	0.999858	-4.52576
RZPDp9028D1317Q	NRBP2	RZPDp9028D1317Q	0.197582	7.63632	1.28278	0.203961	0.999858	-4.5258
RZPDp9028C102Q	ISYNA1	RZPDp9028C102Q	-0.136394	7.88441	-1.28274	0.203973	0.999858	-4.52582
RZPDp9027N159Q	FAM13C	RZPDp9027N159Q	0.176256	8.52316	1.28274	0.203974	0.999858	-4.52582
RZPDp9027N075Q	BICRA	RZPDp9027N075Q	0.200425	8.77991	1.2825	0.204057	0.999858	-4.52596
RZPDp9028G1320Q	ANKHD1	RZPDp9028G1320Q	-0.0981269	6.74121	-1.28208	0.204203	0.999858	-4.5262
RZPDp9027C134Q	EVL	RZPDp9027C134Q	-0.160738	8.32926	-1.28195	0.20425	0.999858	-4.52627
RZPDp9028D1512Q	IKZF3	RZPDp9028D1512Q	0.0917846	6.98829	1.2818	0.204301	0.999858	-4.52636
RZPDp9027D082Q	ZBTB18	RZPDp9027D082Q	-0.323634	8.81086	-1.28164	0.204357	0.999858	-4.52645
RZPDp9028J1512Q	RABGGTB	RZPDp9028J1512Q	-0.0857924	6.90224	-1.2816	0.204371	0.999858	-4.52647
RZPDp9028M1911Q	SART1	RZPDp9028M1911Q	0.0856359	7.04987	1.28157	0.204383	0.999858	-4.52649
RZPDp9028N089Q	ARIH2	RZPDp9028N089Q	-0.191067	8.20505	-1.28073	0.204675	0.999858	-4.52697
RZPDp9028E056Q	TRMT12	RZPDp9028E056Q	0.10852	7.29649	1.28004	0.204916	0.999858	-4.52736
RZPDp9028K037Q	BYSL	RZPDp9028K037Q	0.27482	8.12604	1.27995	0.204948	0.999858	-4.52741
RZPDp9028M0819Q	SF3B2	RZPDp9028M0819Q	0.0780651	6.77329	1.27994	0.204951	0.999858	-4.52742
RZPDp9028L034Q	RTKN	RZPDp9028L034Q	-0.171324	8.59388	-1.27963	0.20506	0.999858	-4.5276
RZPDp9028K147Q	NBAS	RZPDp9028K147Q	-0.0966129	7.14119	-1.27962	0.205062	0.999858	-4.5276
RZPDp9028I0211Q	ADGRE5	RZPDp9028I0211Q	0.0780628	7.11201	1.27879	0.205353	0.999858	-4.52807
RZPDp9027O2314Q	RNF220	RZPDp9027O2314Q	-0.196036	9.75021	-1.27834	0.205512	0.999858	-4.52833
RZPDp9027F037Q	VDAC1	RZPDp9027F037Q	0.110001	7.80381	1.2783	0.205525	0.999858	-4.52835
RZPDp9028B0513Q	EPRS1	RZPDp9028B0513Q	-0.113456	6.75615	-1.27824	0.205547	0.999858	-4.52839
RZPDp9028C0712Q	VIRMA	RZPDp9028C0712Q	0.141497	7.41233	1.2782	0.20556	0.999858	-4.52841
RZPDp9028F2420Q	DDX5	RZPDp9028F2420Q	0.0852389	6.77394	1.27774	0.205719	0.999858	-4.52867
RZPDp9028K1711Q	RAP2B	RZPDp9028K1711Q	-0.126372	7.14695	-1.27768	0.205744	0.999858	-4.52871
RZPDp9027H2018Q	LRRC47	RZPDp9027H2018Q	-0.190337	8.346	-1.27743	0.205831	0.999858	-4.52885
RZPDp9027N212Q	VAPA	RZPDp9027N212Q	0.142695	9.27325	1.27701	0.205978	0.999858	-4.52909
RZPDp9027G036Q	IFT140	RZPDp9027G036Q	-0.134755	7.80403	-1.2767	0.206085	0.999858	-4.52926
RZPDp9028M098Q	F8A1	RZPDp9028M098Q	-0.12253	7.62033	-1.27621	0.206257	0.999858	-4.52954
RZPDp9028O225Q	MYH14	RZPDp9028O225Q	-0.17453	7.86107	-1.27575	0.206421	0.999858	-4.52981
RZPDp9028D1214Q	RAB40C	RZPDp9028D1214Q	-0.31733	8.37489	-1.27555	0.206491	0.999858	-4.52992
RZPDp9028N041Q	PACSIN3	RZPDp9028N041Q	0.12009	8.04203	1.27473	0.206778	0.999858	-4.53038
RZPDp9027M0710Q	DENND3	RZPDp9027M0710Q	0.227248	9.08944	1.27465	0.206807	0.999858	-4.53043
RZPDp9027O079Q	THRA	RZPDp9027O079Q	-0.159518	8.77837	-1.2744	0.206894	0.999858	-4.53057
RZPDp9028K231Q	TNS1	RZPDp9028K231Q	-0.250002	8.51261	-1.27429	0.206933	0.999858	-4.53063
RZPDp9028K145Q	ZNF236	RZPDp9028K145Q	-0.116669	7.39192	-1.27426	0.206946	0.999858	-4.53066
RZPDp9027J2214Q	SF3A2	RZPDp9027J2214Q	-0.14437	8.72962	-1.27424	0.206952	0.999858	-4.53066
RZPDp9027D093Q	PHLDA1	RZPDp9027D093Q	-0.201923	8.93826	-1.27352	0.207205	0.999858	-4.53107
RZPDp9028H032Q	ADCY1	RZPDp9028H032Q	0.0978423	7.16562	1.27336	0.20726	0.999858	-4.53116
RZPDp9027L012Q	UPF3A	RZPDp9027L012Q	0.137389	8.97538	1.2733	0.207284	0.999858	-4.5312
RZPDp9028F0314Q	ELK1	RZPDp9028F0314Q	-0.0784774	6.94868	-1.2724	0.207601	0.999858	-4.53171
RZPDp9027B0618Q	BSG	RZPDp9027B0618Q	0.291336	9.67745	1.27207	0.207717	0.999858	-4.5319
RZPDp9028I0511Q	CSRP1	RZPDp9028I0511Q	-0.174334	7.59037	-1.27144	0.207939	0.999858	-4.53225
RZPDp9027E178Q	ASAP3	RZPDp9027E178Q	0.127876	8.05238	1.27132	0.207981	0.999858	-4.53232
RZPDp9028A2320Q	MYO5A	RZPDp9028A2320Q	-0.223435	7.97368	-1.27113	0.20805	0.999858	-4.53243
RZPDp9028N0110Q	YTHDC1	RZPDp9028N0110Q	-0.0679243	6.95016	-1.27105	0.208076	0.999858	-4.53247
RZPDp9028A176Q	ITGB4	RZPDp9028A176Q	0.129736	7.40199	1.27104	0.208082	0.999858	-4.53248
RZPDp9027N216Q	FAM163B	RZPDp9027N216Q	0.231948	9.96185	1.27015	0.208397	0.999858	-4.53299
RZPDp9028O0113Q	GOLPH3	RZPDp9028O0113Q	0.0938966	6.74061	1.27005	0.20843	0.999858	-4.53304
RZPDp9027F2311Q	ZKSCAN2	RZPDp9027F2311Q	0.244893	9.63346	1.26992	0.208477	0.999858	-4.53311
RZPDp9028J1418Q	YEATS2	RZPDp9028J1418Q	-0.0750401	6.93257	-1.26952	0.20862	0.999858	-4.53334
RZPDp9027G163Q	UBXN1	RZPDp9027G163Q	-0.139805	8.7422	-1.26938	0.208667	0.999858	-4.53342
RZPDp9027A206Q	ZNF408	RZPDp9027A206Q	0.172082	8.85953	1.26883	0.208863	0.999858	-4.53373
RZPDp9027E1116Q	XPO7	RZPDp9027E1116Q	0.243587	9.59858	1.26839	0.209018	0.999858	-4.53398
RZPDp9028A1419Q	HMGN2	RZPDp9028A1419Q	-0.115497	6.89808	-1.26834	0.209036	0.999858	-4.53401
RZPDp9027M0210Q	CXXC1	RZPDp9027M0210Q	0.126717	7.93088	1.26822	0.209081	0.999858	-4.53408
RZPDp9028J1020Q	YTHDC2	RZPDp9028J1020Q	-0.153388	7.20459	-1.26813	0.209111	0.999858	-4.53413
RZPDp9028O1911Q	PSMB4	RZPDp9028O1911Q	-0.130873	7.24936	-1.26807	0.209131	0.999858	-4.53416
RZPDp9028G2010Q	SWI5	RZPDp9028G2010Q	-0.116399	7.34792	-1.26802	0.20915	0.999858	-4.53419
RZPDp9028K1615Q	ADSL	RZPDp9028K1615Q	-0.268631	8.21224	-1.26796	0.209173	0.999858	-4.53423
RZPDp9028A1813Q	PRRC2A	RZPDp9028A1813Q	-0.106576	6.90133	-1.26742	0.209363	0.999858	-4.53453
RZPDp9027C1911Q	RUVBL1	RZPDp9027C1911Q	-0.127642	7.95742	-1.26722	0.209436	0.999858	-4.53464
RZPDp9027M174Q	NUSAP1	RZPDp9027M174Q	0.170156	9.66027	1.26711	0.209473	0.999858	-4.5347
RZPDp9027L1018Q	HNRNPA1	RZPDp9027L1018Q	-0.146304	7.75258	-1.26666	0.209634	0.999858	-4.53496
RZPDp9028I2211Q	CTCF	RZPDp9028I2211Q	-0.133329	7.40602	-1.26655	0.209673	0.999858	-4.53502
RZPDp9027N183Q	TBC1D7	RZPDp9027N183Q	0.148167	8.40012	1.26609	0.209836	0.999858	-4.53528
RZPDp9027M2217Q	PEBP1	RZPDp9027M2217Q	-0.230562	8.80627	-1.26582	0.209931	0.999858	-4.53543
RZPDp9028F2019Q	SCNM1	RZPDp9028F2019Q	-0.094537	6.8739	-1.26564	0.209995	0.999858	-4.53553
RZPDp9028N0815Q	KRT18	RZPDp9028N0815Q	0.135248	7.40689	1.26556	0.210025	0.999858	-4.53558
RZPDp9028L177Q	GRAP	RZPDp9028L177Q	-0.0889142	6.99053	-1.26513	0.210177	0.999858	-4.53582
RZPDp9027E059Q	TRIO	RZPDp9027E059Q	0.192462	8.94977	1.26495	0.210243	0.999858	-4.53593
RZPDp9028P0615Q	SAP30BP	RZPDp9028P0615Q	-0.126734	7.07359	-1.26375	0.210668	0.999858	-4.5366
RZPDp9028E0418Q	TMCO6	RZPDp9028E0418Q	-0.0956402	6.88746	-1.2636	0.210722	0.999858	-4.53668
RZPDp9028A0115Q	AARS1	RZPDp9028A0115Q	-0.193152	7.42856	-1.26328	0.210837	0.999858	-4.53687
RZPDp9028K2020Q	ANAPC1P2	RZPDp9028K2020Q	-0.201822	7.79754	-1.26308	0.21091	0.999858	-4.53698
RZPDp9027L206Q	NMRAL1	RZPDp9027L206Q	-0.172755	8.72811	-1.26306	0.210915	0.999858	-4.53699
RZPDp9028L1517Q	DGUOK	RZPDp9028L1517Q	-0.104943	6.84671	-1.26281	0.211005	0.999858	-4.53713
RZPDp9028E117Q	CKMT1A	RZPDp9028E117Q	-0.144282	7.96373	-1.2628	0.211011	0.999858	-4.53714
RZPDp9027A175Q	CORO1A	RZPDp9027A175Q	0.14808	7.80418	1.26274	0.211032	0.999858	-4.53717
RZPDp9027N1413Q	RPL13	RZPDp9027N1413Q	0.189577	8.86379	1.26266	0.21106	0.999858	-4.53722
RZPDp9027J156Q	ARHGEF2	RZPDp9027J156Q	0.173959	8.91004	1.26234	0.211175	0.999858	-4.5374
RZPDp9028O1813Q	SEPTIN2	RZPDp9028O1813Q	-0.192794	7.23688	-1.26227	0.211199	0.999858	-4.53744
RZPDp9028N021Q	LTBP3	RZPDp9028N021Q	0.214238	8.12551	1.26214	0.211246	0.999858	-4.53751
RZPDp9027F0114Q	AMFR	RZPDp9027F0114Q	0.309446	9.24532	1.26207	0.211269	0.999858	-4.53754
RZPDp9028B213Q	TUBB	RZPDp9028B213Q	-0.137317	7.316	-1.262	0.211294	0.999858	-4.53758
RZPDp9027F075Q	PSMA1	RZPDp9027F075Q	0.346126	8.69476	1.26199	0.211299	0.999858	-4.53759
RZPDp9028O093Q	IGKC	RZPDp9028O093Q	-0.195315	8.13525	-1.26172	0.211396	0.999858	-4.53774
RZPDp9027A031Q	PRPF40B	RZPDp9027A031Q	-0.215218	8.86707	-1.26151	0.211469	0.999858	-4.53786
RZPDp9028O0921Q	LAS1L	RZPDp9028O0921Q	-0.0584788	6.74403	-1.26121	0.211579	0.999858	-4.53803
RZPDp9027G1811Q	DDX5	RZPDp9027G1811Q	-0.137824	7.9348	-1.26119	0.211584	0.999858	-4.53804
RZPDp9028N0515Q	MVP	RZPDp9028N0515Q	-0.174415	7.29305	-1.26101	0.211651	0.999858	-4.53815
RZPDp9028I0610Q	BAZ1B	RZPDp9028I0610Q	0.107312	7.28696	1.26083	0.211713	0.999858	-4.53824
RZPDp9027H046Q	H1-0	RZPDp9027H046Q	0.147449	8.24629	1.25988	0.212055	0.999858	-4.53878
RZPDp9027G049Q	SNHG29	RZPDp9027G049Q	-0.135361	8.20316	-1.25986	0.212063	0.999858	-4.53879
RZPDp9027L1719Q	PABPN1	RZPDp9027L1719Q	0.204807	8.09918	1.25942	0.212218	0.999858	-4.53904
RZPDp9027I0716Q	SF3B1	RZPDp9027I0716Q	-0.182062	8.28229	-1.25938	0.212232	0.999858	-4.53906
RZPDp9027H134Q	BEND5	RZPDp9027H134Q	0.221946	7.83068	1.25931	0.212258	0.999858	-4.5391
RZPDp9028H038Q	RANBP3	RZPDp9028H038Q	-0.191503	7.77495	-1.25834	0.212608	0.999858	-4.53965
RZPDp9027N066Q	NARF	RZPDp9027N066Q	0.350723	9.47733	1.25832	0.212615	0.999858	-4.53966
RZPDp9027E0415Q	TNKS1BP1	RZPDp9027E0415Q	0.25859	9.38933	1.2579	0.212766	0.999858	-4.53989
RZPDp9028B1110Q	IDS	RZPDp9028B1110Q	0.341508	7.59717	1.25764	0.212858	0.999858	-4.54004
RZPDp9027E248Q	RPL6	RZPDp9027E248Q	0.144629	8.47956	1.25655	0.213252	0.999858	-4.54065
RZPDp9028J1220Q	EIF4G2	RZPDp9028J1220Q	0.0603488	6.81011	1.25651	0.213265	0.999858	-4.54067
RZPDp9028B0717Q	PTPRC	RZPDp9028B0717Q	0.1511	7.01838	1.25624	0.213361	0.999858	-4.54082
RZPDp9028A1415Q	THAP4	RZPDp9028A1415Q	0.144881	7.63305	1.25524	0.213724	0.999858	-4.54139
RZPDp9028C2012Q	COL18A1	RZPDp9028C2012Q	-0.0827801	7.02331	-1.25503	0.213798	0.999858	-4.5415
RZPDp9028N1419Q	SRA1	RZPDp9028N1419Q	-0.0871792	6.83698	-1.25499	0.213812	0.999858	-4.54152
RZPDp9028L2012Q	PCBP1	RZPDp9028L2012Q	-0.0934502	7.17002	-1.25489	0.213849	0.999858	-4.54158
RZPDp9028C2111Q	ETS2	RZPDp9028C2111Q	-0.191699	7.32829	-1.25477	0.213891	0.999858	-4.54164
RZPDp9028M1112Q	CAPNS1	RZPDp9028M1112Q	-0.0832139	7.02751	-1.25473	0.213909	0.999858	-4.54167
RZPDp9028D0412Q	SMARCC1	RZPDp9028D0412Q	-0.124264	7.15075	-1.25448	0.213999	0.999858	-4.54181
RZPDp9028K183Q	LGALS3BP	RZPDp9028K183Q	0.0888804	7.50742	1.25429	0.214066	0.999858	-4.54192
RZPDp9027J0815Q	NDRG1	RZPDp9027J0815Q	0.128939	8.49553	1.25408	0.214143	0.999858	-4.54204
RZPDp9028L1511Q	STOML2	RZPDp9028L1511Q	-0.117607	7.15515	-1.254	0.214171	0.999858	-4.54208
RZPDp9028P1720Q	POLR2J3	RZPDp9028P1720Q	-0.0848105	6.72407	-1.25391	0.214204	0.999858	-4.54213
RZPDp9028G0616Q	APBB1	RZPDp9028G0616Q	-0.133121	7.27349	-1.25346	0.214365	0.999858	-4.54238
RZPDp9028G0718Q	ZHX1	RZPDp9028G0718Q	0.0960728	6.8808	1.25321	0.214458	0.999858	-4.54252
RZPDp9028C2116Q	ARHGEF1	RZPDp9028C2116Q	-0.0795773	7.15871	-1.25309	0.214501	0.999858	-4.54259
RZPDp9027K2217Q	TPM3	RZPDp9027K2217Q	-0.127964	8.18375	-1.25307	0.214507	0.999858	-4.5426
RZPDp9028P0914Q	CCT2	RZPDp9028P0914Q	-0.115078	7.09409	-1.25297	0.214543	0.999858	-4.54265
RZPDp9028D2413Q	EIF6	RZPDp9028D2413Q	0.125722	7.00345	1.25293	0.214556	0.999858	-4.54267
RZPDp9028M136Q	ERI2	RZPDp9028M136Q	-0.0897967	7.09836	-1.25272	0.214635	0.999858	-4.5428
RZPDp9028A1912Q	SF3B2	RZPDp9028A1912Q	-0.121178	7.1454	-1.25269	0.214643	0.999858	-4.54281
RZPDp9028M1919Q	FOSB	RZPDp9028M1919Q	-0.0602502	6.71333	-1.25257	0.214689	0.999858	-4.54288
RZPDp9028H204Q	LTBP2	RZPDp9028H204Q	-0.173127	7.6157	-1.25227	0.214797	0.999858	-4.54305
RZPDp9028L0218Q	ZFP36L2	RZPDp9028L0218Q	0.0990205	6.96442	1.25209	0.214862	0.999858	-4.54315
RZPDp9027H208Q	AARS1	RZPDp9027H208Q	-0.212967	8.71116	-1.25173	0.21499	0.999858	-4.54335
RZPDp9027G244Q	NDUFV1	RZPDp9027G244Q	0.127683	9.38722	1.25161	0.215034	0.999858	-4.54341
RZPDp9028H1312Q	EFR3A	RZPDp9028H1312Q	-0.0704467	6.81767	-1.25148	0.215083	0.999858	-4.54349
RZPDp9028J123Q	ARHGEF9	RZPDp9028J123Q	0.169831	8.02421	1.25136	0.215124	0.999858	-4.54355
RZPDp9028O025Q	CAVIN1	RZPDp9028O025Q	-0.13279	7.55263	-1.2513	0.215148	0.999858	-4.54359
RZPDp9028I186Q	AGRN	RZPDp9028I186Q	-0.122071	7.31658	-1.25093	0.215283	0.999858	-4.5438
RZPDp9028B142Q	INTS1	RZPDp9028B142Q	0.202572	7.69253	1.25076	0.215343	0.999858	-4.54389
RZPDp9028F022Q	TPM1	RZPDp9028F022Q	-0.0875498	7.21944	-1.25008	0.215589	0.999858	-4.54427
RZPDp9028C036Q	MUC2	RZPDp9028C036Q	0.214872	7.90598	1.25003	0.215607	0.999858	-4.5443
RZPDp9028C2313Q	LRRFIP1	RZPDp9028C2313Q	0.125147	7.28152	1.24963	0.215755	0.999858	-4.54452
RZPDp9028H035Q	KRT17	RZPDp9028H035Q	-0.125622	7.54857	-1.24913	0.215936	0.999858	-4.5448
RZPDp9028L186Q	RPL18A	RZPDp9028L186Q	-0.172753	7.60309	-1.24826	0.21625	0.999858	-4.54528
RZPDp9027M222Q	TUBGCP6	RZPDp9027M222Q	0.317276	9.22563	1.24826	0.216253	0.999858	-4.54529
RZPDp9028K2218Q	ARPC4	RZPDp9028K2218Q	-0.0997563	7.06911	-1.24776	0.216435	0.999858	-4.54556
RZPDp9027G0814Q	GALK2	RZPDp9027G0814Q	-0.202074	10.1321	-1.24752	0.216522	0.999858	-4.5457
RZPDp9027A184Q	NPM1	RZPDp9027A184Q	0.243638	8.29895	1.24722	0.216631	0.999858	-4.54587
RZPDp9028F0211Q	PSMC6	RZPDp9028F0211Q	0.0789807	7.02475	1.24684	0.216769	0.999858	-4.54608
RZPDp9028D1720Q	LSM2	RZPDp9028D1720Q	-0.163619	7.34163	-1.24622	0.216993	0.999858	-4.54642
RZPDp9027E157Q	RPAIN	RZPDp9027E157Q	0.143059	7.87498	1.24594	0.217097	0.999858	-4.54658
RZPDp9028J224Q	PSAP	RZPDp9028J224Q	-0.140685	7.57397	-1.24588	0.21712	0.999858	-4.54661
RZPDp9027G2214Q	RASGEF1C	RZPDp9027G2214Q	-0.195755	10.0165	-1.24587	0.217124	0.999858	-4.54662
RZPDp9028F0512Q	CPSF2	RZPDp9028F0512Q	-0.118109	7.02445	-1.24573	0.217173	0.999858	-4.54669
RZPDp9028O221Q	PRDX5	RZPDp9028O221Q	-0.0868267	7.1251	-1.24546	0.217273	0.999858	-4.54684
RZPDp9027J129Q	ROBO2	RZPDp9027J129Q	0.143342	8.57714	1.24531	0.217328	0.999858	-4.54693
RZPDp9028A026Q	NACA	RZPDp9028A026Q	0.133855	7.48913	1.24509	0.217406	0.999858	-4.54705
RZPDp9028H0710Q	CLSTN3	RZPDp9028H0710Q	-0.0981441	7.42694	-1.24461	0.217582	0.999858	-4.54732
RZPDp9028C0519Q	RNF20	RZPDp9028C0519Q	-0.107843	6.86408	-1.24453	0.217611	0.999858	-4.54736
RZPDp9027E076Q	EFS	RZPDp9027E076Q	0.180946	9.71259	1.24419	0.217737	0.999858	-4.54755
RZPDp9028O052Q	NEURL4	RZPDp9028O052Q	-0.116701	7.49807	-1.24405	0.217787	0.999858	-4.54763
RZPDp9028J187Q	ZYX	RZPDp9028J187Q	0.149564	7.57002	1.24386	0.217856	0.999858	-4.54773
RZPDp9027B059Q	MIER2	RZPDp9027B059Q	0.315302	9.47684	1.24359	0.217954	0.999858	-4.54788
RZPDp9027D2119Q	MAGI1	RZPDp9027D2119Q	-0.299016	8.77814	-1.24349	0.217992	0.999858	-4.54794
RZPDp9027C0213Q	OGT	RZPDp9027C0213Q	-0.0769076	7.31219	-1.24279	0.21825	0.999858	-4.54833
RZPDp9028H0918Q	MAD1L1	RZPDp9028H0918Q	-0.142067	7.07829	-1.2427	0.218281	0.999858	-4.54838
RZPDp9028F0216Q	GPBP1L1	RZPDp9028F0216Q	0.0683678	6.91481	1.24265	0.2183	0.999858	-4.54841
RZPDp9028M128Q	BABAM2	RZPDp9028M128Q	0.11323	7.38917	1.24258	0.218324	0.999858	-4.54844
RZPDp9028E122Q	BAG6	RZPDp9028E122Q	0.0830632	7.37774	1.24236	0.218407	0.999858	-4.54857
RZPDp9027F176Q	RUSC1	RZPDp9027F176Q	0.219378	9.44739	1.24195	0.218556	0.999858	-4.54879
RZPDp9028I033Q	LRP1	RZPDp9028I033Q	0.0827479	7.23082	1.24184	0.218597	0.999858	-4.54885
RZPDp9027N0816Q	TNFRSF25	RZPDp9027N0816Q	0.238137	10.175	1.24175	0.218628	0.999858	-4.5489
RZPDp9027O1010Q	BRD3	RZPDp9027O1010Q	-0.164379	9.89372	-1.24121	0.218827	0.999858	-4.5492
RZPDp9028I1719Q	UNC45A	RZPDp9028I1719Q	-0.106097	7.223	-1.24087	0.218952	0.999858	-4.54939
RZPDp9027O234Q	C1orf131	RZPDp9027O234Q	-0.159442	9.61255	-1.24034	0.219147	0.999858	-4.54969
RZPDp9028D201Q	PRRC2B	RZPDp9028D201Q	-0.0976464	6.98607	-1.24012	0.219227	0.999858	-4.54981
RZPDp9027M1720Q	ZNF827	RZPDp9027M1720Q	-0.165878	7.31977	-1.23997	0.219283	0.999858	-4.54989
RZPDp9027J2113Q	ELP2	RZPDp9027J2113Q	0.255248	8.216	1.23993	0.219297	0.999858	-4.54991
RZPDp9028A0120Q	POLA1	RZPDp9028A0120Q	0.193912	6.87335	1.23983	0.219333	0.999858	-4.54997
RZPDp9027M0110Q	SMARCD1	RZPDp9027M0110Q	0.413366	9.76957	1.23921	0.219563	0.999858	-4.55031
RZPDp9028B1218Q	PAIP1	RZPDp9028B1218Q	0.111611	7.19272	1.23914	0.219587	0.999858	-4.55035
RZPDp9028F2114Q	ATP6AP1	RZPDp9028F2114Q	-0.0926504	7.04418	-1.23911	0.219599	0.999858	-4.55037
RZPDp9028A236Q	ZNF653	RZPDp9028A236Q	-0.116867	7.33508	-1.23894	0.219661	0.999858	-4.55046
RZPDp9027L0618Q	TBR1	RZPDp9027L0618Q	-0.218697	8.5061	-1.23833	0.219886	0.999858	-4.5508
RZPDp9027B109Q	RPL7	RZPDp9027B109Q	-0.159934	8.05005	-1.23812	0.219965	0.999858	-4.55092
RZPDp9027A203Q	GLG1	RZPDp9027A203Q	0.14008	8.69742	1.23793	0.220036	0.999858	-4.55102
RZPDp9027F084Q	DCTN2	RZPDp9027F084Q	0.378455	8.91495	1.23787	0.220058	0.999858	-4.55106
RZPDp9028N0119Q	ZNF439	RZPDp9028N0119Q	0.0782664	6.83603	1.23785	0.220064	0.999858	-4.55107
RZPDp9027M095Q	POLE2	RZPDp9027M095Q	0.154688	7.98301	1.23711	0.220335	0.999858	-4.55147
RZPDp9028J159Q	NOP2	RZPDp9028J159Q	0.0984807	7.28185	1.23705	0.220359	0.999858	-4.55151
RZPDp9028A169Q	CYB5B	RZPDp9028A169Q	-0.108305	7.36487	-1.23703	0.220367	0.999858	-4.55152
RZPDp9027P1611Q	PUM1	RZPDp9027P1611Q	-0.275493	10.3944	-1.23644	0.220584	0.999858	-4.55184
RZPDp9027A075Q	CAPZB	RZPDp9027A075Q	0.150055	8.59432	1.23629	0.220639	0.999858	-4.55193
RZPDp9028O014Q	HNRNPH1	RZPDp9028O014Q	-0.180118	7.66822	-1.23614	0.220695	0.999858	-4.55201
RZPDp9027F231Q	UBE2L3	RZPDp9027F231Q	0.168748	8.02829	1.23581	0.220816	0.999858	-4.55219
RZPDp9028M145Q	ROCK2	RZPDp9028M145Q	0.124404	7.59685	1.23565	0.220874	0.999858	-4.55228
RZPDp9028P2014Q	MRPL4	RZPDp9028P2014Q	-0.129788	7.12924	-1.23526	0.22102	0.999858	-4.5525
RZPDp9028B0917Q	CSRNP1	RZPDp9028B0917Q	-0.164982	7.44061	-1.23506	0.221093	0.999858	-4.5526
RZPDp9028P076Q	GOLGA4	RZPDp9028P076Q	-0.1875	7.51737	-1.23489	0.221154	0.999858	-4.5527
RZPDp9028G221Q	BCAR1	RZPDp9028G221Q	-0.0835396	7.00762	-1.23466	0.221241	0.999858	-4.55283
[truncated: 12,994 more rows]

## Sheet: Table S5
geneSet	description	enrichment Score	normalized Enrichment Score	pValue	FDR	size	leading Edge Num	userId
R-HSA-382551	Transport of small molecules	0.566517	1.95571	0.0017094	0.0902551	14	10	ABCF1;AP2A1;ATP1A3;ATP6V1B2;CALM3;GNAS;NR1H2;PSMF1;SLC35B2;SLC44A1
R-HSA-5653656	Vesicle-mediated transport	0.366322	1.47093	0.0853242	0.925652	20	9	ACBD3;AP2A1;ARFIP2;CALM3;COL1A1;CUX1;DYNC1I2;KLC2;PPP6R1
R-HSA-199991	Membrane Trafficking	0.332922	1.30992	0.16609	1	19	8	ACBD3;AP2A1;ARFIP2;CALM3;CUX1;DYNC1I2;KLC2;PPP6R1
R-HSA-597592	Post-translational protein modification	0.284856	1.25943	0.212171	1	29	16	BIRC2;CALM3;DYNC1I2;FBXL16;FBXW4;FN1;GOLM1;MBD1;NPM1;NR1H2;NUP188;PPP6R1;PSMD1;PSMF1;SPSB3;UBE2Q2
R-HSA-74160	Gene expression (Transcription)	0.241867	1.15008	0.280507	1	37	8	CALM3;COL1A1;NR1H2;RBM8A;SAP30BP;SMARCE1;SRSF9;ZNF266
R-HSA-73857	RNA Polymerase II Transcription	0.222222	1.03184	0.428797	1	34	7	CALM3;COL1A1;NR1H2;RBM8A;SMARCE1;SRSF9;ZNF266
R-HSA-162582	Signal Transduction	0.199019	1.01607	0.458199	1	49	8	AP2A1;ATP6V1B2;CALM3;COL1A1;PPP1CA;RTN4;SQSTM1;TLE2
R-HSA-109582	Hemostasis	0.258153	0.954176	0.524561	1	16	3	CALM3;COL1A1;MAFF
R-HSA-372790	Signaling by GPCR	0.282374	0.942365	0.506045	1	12	4	CALM3;GNAS;PPP1CA;PREX1
R-HSA-388396	GPCR downstream signalling	0.282374	0.942365	0.506045	1	12	4	CALM3;GNAS;PPP1CA;PREX1
R-HSA-1280218	Adaptive Immune System	0.211843	0.898741	0.599354	1	25	7	AP2A1;CALM3;COL1A1;DYNC1I2;FBXL16;FBXW4;UBE2Q2
R-HSA-168256	Immune System	0.166706	0.874595	0.631098	1	57	11	ACLY;AP2A1;ATP6V1B2;CALM3;COL1A1;FBXL16;FBXW4;IL4R;SQSTM1;TANK;UBE2Q2
R-HSA-556833	Metabolism of lipids	0.242506	0.863094	0.649737	1	15	7	ACLY;NFYC;NR1H2;PPP1CA;SLC44A1;SMARCD3;VAPA
R-HSA-212436	Generic Transcription Pathway	0.190074	0.845354	0.664516	1	29	5	CALM3;COL1A1;NR1H2;SMARCE1;ZNF266
R-HSA-392499	Metabolism of proteins	0.168523	0.838323	0.6976	1	45	15	CALM3;DYNC1I2;EEF1B2;FBXL16;FBXW4;FN1;GOLM1;KHSRP;NFYC;NR1H2;NUP188;PPP6R1;PSMF1;SPSB3;UBE2Q2
R-HSA-983169	Class I MHC mediated antigen processing & presentation	0.262455	0.827538	0.697023	0.97501	11	3	FBXL16;FBXW4;UBE2Q2
R-HSA-5663205	Infectious disease	0.225057	0.806735	0.68386	0.951534	15	2	AP2A1;CALM3
R-HSA-1430728	Metabolism	0.135568	0.662799	0.901082	0.997587	42	15	ACLY;CALM3;DTYMK;GART;GNAS;NFYC;NR1H2;NUP188;PODXL2;PPP1CA;PSMF1;SLC35B2;SLC44A1;SMARCD3;VAPA
R-HSA-72203	Processing of Capped Intron-Containing Pre-mRNA	0.186116	0.594856	0.924866	0.96653	11	4	NUP188;RBM22;RBM8A;SRSF9
R-HSA-8953854	Metabolism of RNA	0.134101	0.571291	0.939189	0.939737	25	23	DHX37;ELAVL1;ERCC3;FUS;HNRNPA1;KHSRP;METTL3;NOP56;NUP188;PQBP1;PSMC3;PSMD1;PSMF1;RBM22;RBM8A;RPL27;RPLP0;SKIV2L;SMG5;SRSF3;SRSF9;SUPT5H;YWHAB
R-HSA-195258	RHO GTPase Effectors	-0.160193	-0.569314	0.947494	0.954913	12	5	ARPC4;BUB1B;MYH9;PKN1;TUBA1B
R-HSA-2262752	Cellular responses to stress	-0.18254	-0.62786	0.902222	0.988763	11	11	CABIN1;DYNC1I2;EEF1A1;GSR;NUP188;PHC1;PSMC3;PSMD1;PSMF1;TUBA1B;UBN1
R-HSA-1280215	Cytokine Signaling in Immune system	-0.182449	-0.780012	0.723039	0.878387	19	2	PIK3R2;PLCG1
R-HSA-8953897	Cellular responses to external stimuli	-0.230379	-0.810085	0.693735	0.914472	12	6	CABIN1;CHMP4A;EEF1A1;GSR;PHC1;TUBA1B
R-HSA-6798695	Neutrophil degranulation	-0.218794	-0.899704	0.575829	0.840201	19	18	ARHGAP9;ATAD3B;CNN2;CTSC;DOCK2;DPP7;EEF1A1;GAA;GOLGA7;GPI;HLA-B;PSMC3;PSMD1;S100A9;SERPINB1;SLC27A2;STK10;VAPA
R-HSA-8878171	Transcriptional regulation by RUNX1	-0.303101	-0.987286	0.463801	0.758942	10	4	KMT2C;PHC1;PRKCQ;SMARCB1
R-HSA-1640170	Cell Cycle	-0.280304	-1.03449	0.428571	0.745962	13	3	BUB1B;LMNA;MCM2
R-HSA-69278	Cell Cycle, Mitotic	-0.312049	-1.07613	0.37415	0.766514	11	3	BUB1B;LMNA;MCM2
R-HSA-1643685	Disease	-0.245539	-1.17841	0.241287	0.653652	27	5	LMNA;PEBP1;PIK3R2;PLCG1;RPL36A
R-HSA-168249	Innate Immune System	-0.235259	-1.19594	0.237333	0.769631	35	10	ARPC4;ATAD3B;CTSC;EEF1A1;GPI;ICAM3;PIK3R2;PLCG1;PRKCQ;RIPK1
R-HSA-422475	Axon guidance	-0.330095	-1.40216	0.13217	0.461423	19	4	AGAP2;PIK3R2;PLCG1;RPL36A
R-HSA-1266738	Developmental Biology	-0.346297	-1.51968	0.0600522	0.41243	22	8	AGAP2;ARPC4;DRAP1;KMT2C;PIK3R2;PLCG1;PRKCQ;RPL36A
R-HSA-5663202	Diseases of signal transduction	-0.493579	-1.6945	0.0310263	0.317117	11	4	LMNA;PEBP1;PIK3R2;PLCG1

## Sheet: Table S6
row.names	names	SYMBOL	logFC	AveExpr	t	P.Value	adj.P.Val	B
34	RZPDp9028J033Q	MAFF	1.03942	8.33867	4.24179	4.82859e-05	0.0209129	1.81119
9	RZPDp9027A226Q	HPRT1	0.963866	8.10102	4.90535	3.46727e-06	0.00559967	4.13569
641	RZPDp9027F028Q	EFTUD2	0.931465	9.98312	2.63915	0.00959182	0.224353	-2.7528
45	RZPDp9027C026Q	PSMC4	0.922541	7.66325	4.01003	0.000114626	0.0381907	1.0526
124	RZPDp9027O2317Q	PCMT1	0.898323	9.08756	3.51098	0.000662092	0.0800544	-0.475133
146	RZPDp9027F2012Q	ADK	0.895478	9.15854	3.44361	0.000829032	0.0851348	-0.669589
1295	RZPDp9027A2015Q	EFCC1	0.891576	10.6603	2.26844	0.0253721	0.293748	-3.55279
757	RZPDp9027M1313Q	FMNL1	0.880223	8.34126	2.55717	0.0119987	0.237645	-2.93887
605	RZPDp9027H2213Q	ISYNA1	0.865809	8.53792	2.66768	0.00886291	0.219639	-2.68689
32	RZPDp9027I246Q	HDAC2	0.860807	7.39231	4.26981	4.34064e-05	0.0200625	1.90485
977	RZPDp9027J2019Q	ARFIP2	0.850369	9.56039	2.41384	0.0175367	0.268708	-3.25175
144	RZPDp9027B2213Q	TUBGCP6	0.849737	9.15678	3.44546	0.00082395	0.0851348	-0.664277
46	RZPDp9028H221Q	AXIN2	0.84917	7.94999	4.00209	0.000118007	0.0384625	1.02714
516	RZPDp9027H2211Q	FBXW5	0.838422	8.9703	2.77151	0.00661387	0.192174	-2.44178
371	RZPDp9027M0413Q	RPS3A	0.837665	9.18338	2.94842	0.00394613	0.158291	-2.00596
120	RZPDp9027J0719Q	LUM	0.810988	8.4455	3.53589	0.000608818	0.0760667	-0.40249
234	RZPDp9027A149Q	WDR62	0.802701	8.08539	3.18567	0.00190765	0.122129	-1.38654
650	RZPDp9027A0815Q	CYC1	0.801141	10.5704	2.63135	0.00980056	0.225751	-2.77074
317	RZPDp9027M059Q	PEPD	0.796659	7.91332	3.02088	0.00317359	0.149743	-1.82096
39	RZPDp9027J106Q	AKR1B1	0.794155	9.08198	4.13415	7.24174e-05	0.0278399	1.45519
209	RZPDp9027N1919Q	PSME1	0.792862	9.071	3.22944	0.00166126	0.119174	-1.26802
892	RZPDp9027G1011Q	RO60	0.791623	9.82951	2.46885	0.015187	0.25479	-3.13354
1236	RZPDp9027M138Q	UBL7	0.784353	8.46895	2.29078	0.0239974	0.290823	-3.50763
82	RZPDp9028A172Q	SH2B2	0.77678	8.39309	3.74554	0.000295922	0.053158	0.224205
570	RZPDp9027E027Q	GPT2	0.768563	8.87827	2.70621	0.00795782	0.209303	-2.59686
205	RZPDp9027H2318Q	RINT1	0.768062	8.57864	3.24264	0.00159299	0.115836	-1.23201
637	RZPDp9027B0310Q	ARFIP2	0.765309	8.57917	2.64198	0.00951727	0.223793	-2.7463
1728	RZPDp9027F0811Q	ADK	0.764907	10.5597	2.11347	0.0369572	0.320659	-3.85509
592	RZPDp9028B083Q	BCORL1	0.764645	8.34406	2.67799	0.00861196	0.218073	-2.6629
668	RZPDp9028J092Q	DAXX	0.757429	8.80805	2.61689	0.0101981	0.228762	-2.80384
1497	RZPDp9027B1611Q	ITM2C	0.756561	10.0452	2.19559	0.0303483	0.303838	-3.69732
182	RZPDp9028E082Q	ELF3	0.754915	8.72213	3.32876	0.00120803	0.0995161	-0.994261
999	RZPDp9027A2310Q	FAM102A	0.74985	8.8639	2.40478	0.0179533	0.2692	-3.27099
1044	RZPDp9027A0515Q	RPS15	0.72971	9.54272	2.38801	0.0187477	0.269238	-3.30645
11	RZPDp9027M206Q	PABPC1	0.724455	7.50793	4.81992	4.92725e-06	0.00625562	3.82469
964	RZPDp9027M1113Q	NSMF	0.723012	8.85136	2.42221	0.0171595	0.266677	-3.23391
1093	RZPDp9028B081Q	ULK1	0.722944	9.07055	2.35565	0.020369	0.279181	-3.37423
239	RZPDp9027P1119Q	AKAP6	0.720946	8.62879	3.16981	0.00200505	0.123807	-1.42917
453	RZPDp9028N2420Q	PBX2	0.716786	9.23894	2.83601	0.00549286	0.181243	-2.28551
1556	RZPDp9027N0611Q	CYFIP2	0.714442	10.0332	2.17533	0.0318747	0.307012	-3.73674
197	RZPDp9028F201Q	CLU	0.711636	8.68442	3.2754	0.00143472	0.109124	-1.14216
1718	RZPDp9027N0411Q	ATG2A	0.711395	9.76441	2.1158	0.0367536	0.320374	-3.85068
709	RZPDp9027L1112Q	CDKN3	0.711349	8.6039	2.58979	0.0109825	0.232216	-2.86544
1208	RZPDp9028M031Q	TRADD	0.710746	8.73192	2.30239	0.0233089	0.289076	-3.484
1190	RZPDp9027D1616Q	ARMCX3	0.709775	8.67512	2.31186	0.0227604	0.286562	-3.46465
1701	RZPDp9027C0711Q	CEBPZ	0.709143	10.1416	2.12024	0.0363692	0.320374	-3.8423
1047	RZPDp9027I1110Q	EIF6	0.705873	8.5511	2.38515	0.0188865	0.270327	-3.31248
871	RZPDp9027G0210Q	ABHD12	0.705826	8.91977	2.48338	0.0146155	0.251366	-3.10193
255	RZPDp9027K2313Q	RPS4X	0.704586	9.15688	3.14783	0.00214768	0.126275	-1.48796
640	RZPDp9027B126Q	JMJD6	0.703845	11.5248	2.64048	0.00955672	0.223881	-2.74975
1159	RZPDp9027I0216Q	VPS33B	0.699828	8.97624	2.32624	0.0219493	0.283737	-3.43513
1647	RZPDp9028K152Q	TRADD	0.697855	8.42085	2.14396	0.0343711	0.312667	-3.79715
400	RZPDp9028F1420Q	LMF2	0.697532	9.09602	2.89739	0.00459051	0.170727	-2.13401
282	RZPDp9027J1919Q	NCL	0.695639	7.83466	3.07385	0.00270008	0.143554	-1.68338
803	RZPDp9027M016Q	CSNK2B	0.690071	9.14889	2.52792	0.0129806	0.242365	-3.00399
573	RZPDp9027F0213Q	PISD	0.689669	9.2378	2.70411	0.00800483	0.209453	-2.60179
399	RZPDp9027F053Q	TNKS1BP1	0.688106	8.52927	2.8999	0.0045566	0.170727	-2.12774
148	RZPDp9027F1116Q	RPL4	0.68604	9.66128	3.43854	0.000843063	0.0854057	-0.684087
2033	RZPDp9027I1611Q	SIAH1	0.682849	10.3704	2.00905	0.0471279	0.346533	-4.04778
858	RZPDp9027M2016Q	UXT	0.679423	9.81982	2.49331	0.0142356	0.248304	-3.08022
613	RZPDp9027M0513Q	ZBTB18	0.677086	9.16425	2.65833	0.00909602	0.222219	-2.70855
763	RZPDp9027L1919Q	RPS27A	0.675803	9.03111	2.55273	0.0121432	0.237766	-2.94878
242	RZPDp9028G193Q	ANXA11	0.674804	9.18672	3.16862	0.00201254	0.123807	-1.43236
1713	RZPDp9027H1013Q	RHOBTB2	0.673867	9.26444	2.11722	0.0366303	0.320374	-3.848
62	RZPDp9028N072Q	THRA	0.672597	8.14343	3.85583	0.000200278	0.0484318	0.564632
705	RZPDp9027K2215Q	MAP1LC3A	0.6725	8.71489	2.59266	0.0108968	0.231739	-2.85894
1363	RZPDp9027O2111Q	MON1A	0.671887	9.64738	2.24292	0.0270272	0.296115	-3.6039
107	RZPDp9028C121Q	SETD1B	0.670493	8.39474	3.6156	0.000464279	0.0650555	-0.167444
1697	RZPDp9027A1615Q	ZNF622	0.669377	9.70371	2.12248	0.0361763	0.319618	-3.83805
1289	RZPDp9027M0815Q	GNAS	0.664699	8.89371	2.26975	0.0252899	0.293748	-3.55016
156	RZPDp9028J233Q	GPC1	0.664406	7.89218	3.40964	0.000927509	0.0881566	-0.76651
1722	RZPDp9027M2319Q	MXI1	0.663337	8.60609	2.11504	0.0368201	0.320374	-3.85212
201	RZPDp9028F241Q	ANXA11	0.6605	7.8833	3.25411	0.00153583	0.11456	-1.20065
258	RZPDp9027D1114Q	UBC	0.65751	9.5446	3.13861	0.00221031	0.128027	-1.51253
1463	RZPDp9027N066Q	NARF	0.657341	9.38365	2.21088	0.0292382	0.299637	-3.66733
1840	RZPDp9027E2411Q	HADHA	0.65377	9.68496	2.07695	0.040275	0.32789	-3.92349
35	RZPDp9028O211Q	CPSF1	0.653115	8.47874	4.2389	4.88195e-05	0.0209129	1.80152
1956	RZPDp9027J1310Q	SQLE	0.652835	8.85344	2.03093	0.0448183	0.343414	-4.00814
851	RZPDp9028C191Q	KLF6	0.652519	8.2063	2.49744	0.0140805	0.247927	-3.07117
224	RZPDp9027G0918Q	LINGO1	0.651057	8.69228	3.201	0.00181775	0.121515	-1.34519
362	RZPDp9028E243Q	SFTPB	0.650447	7.67045	2.95483	0.00387144	0.158291	-1.98975
306	RZPDp9027A1110Q	NBEA	0.648744	7.88233	3.03588	0.00303228	0.148335	-1.78221
545	RZPDp9027K1412Q	DENND5A	0.64855	9.27355	2.72719	0.00750122	0.205801	-2.54739
734	RZPDp9028H091Q	RALBP1	0.647698	7.88771	2.57167	0.0115368	0.235611	-2.90632
916	RZPDp9027E1815Q	TMEM183A	0.647532	9.65672	2.45144	0.0158985	0.260224	-3.17121
626	RZPDp9027G2119Q	NACAD	0.645787	9.15465	2.64767	0.00936869	0.223404	-2.73319
270	RZPDp9028J181Q	BCL6	0.645378	7.75503	3.09887	0.00250001	0.138824	-1.61771
645	RZPDp9027K1918Q	TUBGCP4	0.642097	8.89773	2.63528	0.00969498	0.225259	-2.76172
379	RZPDp9028N231Q	SPATA2	0.639833	8.22167	2.94376	0.00400134	0.158291	-2.01773
1126	RZPDp9027G0719Q	MAPK12	0.639706	9.64193	2.33943	0.0212275	0.282649	-3.40789
774	RZPDp9027O1115Q	COPB2	0.638964	8.81606	2.54683	0.0123378	0.238837	-2.96195
748	RZPDp9027B1211Q	USP11	0.637078	8.93825	2.56171	0.0118523	0.237454	-2.92869
116	RZPDp9027B1716Q	GLMN	0.636594	8.71594	3.57429	0.000534569	0.069093	-0.289764
1939	RZPDp9027I0111Q	CFL1	0.636211	9.28281	2.03759	0.0441346	0.341264	-3.996
395	RZPDp9027C122Q	PFKM	0.635941	9.0133	2.91333	0.00437946	0.166046	-2.0942
1260	RZPDp9027M027Q	MCM2	0.632393	8.31467	2.28149	0.0245611	0.291969	-3.52646
1058	RZPDp9027A2319Q	MICAL1	0.627941	8.23478	2.3779	0.0192416	0.272492	-3.32772
1247	RZPDp9027G1413Q	GBF1	0.627678	9.2184	2.28638	0.0242631	0.291221	-3.51656
170	RZPDp9028L172Q	APBB1IP	0.627612	8.22285	3.37012	0.0010559	0.0931246	-0.878332
1819	RZPDp9028L233Q	AEBP1	0.626583	8.83511	2.08333	0.0396774	0.327039	-3.91162
1175	RZPDp9027J0213Q	FDFT1	0.626511	8.49652	2.31946	0.0223285	0.284778	-3.44906
728	RZPDp9027I1811Q	USF2	0.624902	9.93838	2.57419	0.0114582	0.235611	-2.90064
299	RZPDp9028K104Q	TPSB2	0.623615	8.24832	3.04049	0.00299001	0.148335	-1.77026
731	RZPDp9027L1712Q	XRN2	0.62101	8.6087	2.5725	0.0115109	0.235611	-2.90445
2027	RZPDp9027I1310Q	OLFM1	0.620885	8.49823	2.01119	0.0468975	0.346533	-4.04392
1669	RZPDp9027B2316Q	RPL18	0.620616	9.61382	2.13658	0.0349818	0.314119	-3.81123
256	RZPDp9027K0712Q	EIF3K	0.619618	8.75467	3.14619	0.00215869	0.126427	-1.49233
799	RZPDp9027O0714Q	TBCD	0.618527	9.76272	2.52995	0.0129103	0.242056	-2.99949
1022	RZPDp9027D1819Q	GGPS1	0.61647	8.28541	2.39483	0.018421	0.2692	-3.29206
1799	RZPDp9027J079Q	GNAO1	0.615282	9.10165	2.08983	0.0390769	0.32567	-3.89949
141	RZPDp9028F041Q	MEPCE	0.614826	7.81455	3.45302	0.000803524	0.0851348	-0.642585
1300	RZPDp9027O1919Q	EIF3L	0.614693	8.43764	2.26542	0.0255633	0.294438	-3.55887
1040	RZPDp9027G0615Q	CIC	0.614239	9.78838	2.38874	0.0187124	0.2692	-3.30491
1102	RZPDp9028B0320Q	RPL37A	0.613814	8.57053	2.35071	0.0206275	0.280236	-3.38452
566	RZPDp9027E0614Q	USP20	0.612959	8.86239	2.711	0.0078515	0.207792	-2.5856
544	RZPDp9027G1919Q	NUDT5	0.612492	8.00238	2.7281	0.00748199	0.205801	-2.54524
1715	RZPDp9027L1516Q	SSR2	0.611413	8.97953	2.11678	0.0366687	0.320374	-3.84884
521	RZPDp9027P0418Q	TFAP4	0.611083	8.64225	2.76722	0.00669549	0.192679	-2.45208
1367	RZPDp9027L0519Q	EXOC3	0.610812	8.46608	2.24195	0.0270921	0.296115	-3.60584
1002	RZPDp9027A2212Q	NSUN5P1	0.608323	8.63461	2.4027	0.0180504	0.2692	-3.27541
273	RZPDp9027P1212Q	NES	0.606579	8.09993	3.08969	0.00257181	0.140966	-1.64187
656	RZPDp9028K213Q	GCDH	0.605828	8.34536	2.62719	0.00991346	0.226574	-2.78028
529	RZPDp9027D0915Q	TUBA1A	0.605036	7.96258	2.75333	0.00696565	0.197422	-2.48528
714	RZPDp9027B1512Q	MICU1	0.604883	9.60412	2.58693	0.0110683	0.23242	-2.87191
505	RZPDp9027B1917Q	ZNF133	0.604622	8.66275	2.77916	0.00647079	0.191154	-2.4234
585	RZPDp9027E2418Q	ATP1A1	0.603763	8.2642	2.69122	0.00829957	0.21271	-2.63203
931	RZPDp9027F1711Q	VPS51	0.603364	9.55468	2.44416	0.0162046	0.260403	-3.18689
686	RZPDp9027N0819Q	CDCA5	0.602403	8.36835	2.60578	0.0105132	0.229208	-2.82915
86	RZPDp9028G222Q	B4GALT2	0.601877	8.18162	3.71885	0.000324884	0.0561134	0.142909
730	RZPDp9028D102Q	SNRNP35	0.599453	8.24973	2.57349	0.01148	0.235611	-2.90222
1740	RZPDp9027I0515Q	LRRC4B	0.598728	8.88234	2.1101	0.037253	0.320803	-3.86144
776	RZPDp9027M0712Q	PGAP6	0.598599	9.17931	2.54573	0.0123745	0.238854	-2.96441
1332	RZPDp9027A1218Q	GDPD1	0.5975	8.88081	2.25378	0.0263115	0.295399	-3.58221
[truncated: 14,860 more rows]

## Sheet: Table S7
geneSet	description	enrichment Score	normalized Enrichment Score	pValue	FDR	size	leading Edge Num	userId
[truncated: 40 more rows]

[truncated: 3 more sheets: Table S8, Table S9, Table S10]
